# Supplementary material for: Comparative Phenotypic Analysis of the Major Fungal Pathogens Candida parapsilosis and Candida albicans
Source: PLoS Pathog. 2014 Sep 18;10(9):e1004365. doi: 10.1371/journal.ppat.1004365 (PMC4169492; doi:10.1371/journal.ppat.1004365)
Supplement: Table S4 — GO-term enrichment for RNA-seq experiments. (XLS) [file ppat.1004365.s008.xls]

## Sheet: Upregulated in Biofilm
Table S4. Gene Ontology results for genes upregulated in biofilms compared to planktonic cells.
Legend:
GOID:	Gene Ontology ID as annotated in the Candida Genome Database (CGD) for C. parapsilosis
GO_term	Gene Ontology term associated to GOID
Biological Process
GOID	GO_term	Cluster frequency	Background frequency	Corrected P-value	False discovery rate	Gene(s) annotated to the term	Directly Annotated GOID List
55085	transmembrane transport	73 out of 575 genes, 12.7%	316 out of 5259 background genes, 6.0%	1.13e-07	0	GNP1:FRP3:orf19.1308:FCY21:orf19.136:orf19.1867:CFL4:SGE1:PEX12:HGT8:NAG3:NAG4:OPT1:HGT14:XUT1:DIP5:PUT4:HIP1:orf19.321:orf19.3232:GIT1:orf19.341:CTR1:GEF2:AGP3:MAL31:PEX4:orf19.4090:orf19.4174:GAP1:orf19.4337:GAP4:orf19.4550:HGT17:TPO4:orf19.4779:FTH1:orf19.4940:HSP70:DAL7:MUP1:JEN2:NGT1:HGT19:MDR1:FRP1:PEX5:RCH1:OPT7:DUR4:orf19.5720:HGT10:OPT8:PEX1:FLU1:GAP6:orf19.6691:PTR22:DAL9:orf19.6976:GAP…	6791:8655:15727:6513:15749:15840:51701:70778:6635:19740:43091:15802:35879:15794:15677:33215:35672:15833:15813:30447:6631:44416:6821:6849:55085:15753:42906:15903:6863:6820:10106:32975:15861:71216:55114:15851:72530:6556:35442:6808:6847:16558:15884:6855:15743:34605:42938:97080:15893:15718:6827:15846:15847:6825:10509:15758:44117:16560:34226:6457:44182:70509:44690:16562:6835:15696:6817:8645:19631:3425…
19395	fatty acid oxidation	11 out of 575 genes, 1.9%	12 out of 5259 background genes, 0.2%	2.63e-07	0	ALK8:PEX11:FOX2:POX1-3:PXP2:orf19.4122:CAT2:PEX5:ANT1:ECI1:POT1	9437:6635:42760:30447:6084:6631:16558:9062:45733:10430:15867:15976:6637:16560:45333:48252:42758:6097:19395:44011:7031:42318:16559:6625:9405
34440	lipid oxidation	11 out of 575 genes, 1.9%	12 out of 5259 background genes, 0.2%	2.63e-07	0	ALK8:PEX11:FOX2:POX1-3:PXP2:orf19.4122:CAT2:PEX5:ANT1:ECI1:POT1	9437:6635:42760:30447:6084:6631:16558:9062:45733:10430:15867:15976:6637:16560:45333:48252:42758:6097:19395:44011:7031:42318:16559:6625:9405
72329	monocarboxylic acid catabolic process	17 out of 575 genes, 3.0%	29 out of 5259 background genes, 0.6%	5.34e-07	0	FOX2:POX1-3:PXP2:HGT14:orf19.345:orf19.4122:SPS20:CTN1:CAT2:MLS1:PEX5:ANT1:FDH1:ECI1:ICL1:POT1:UGA1	9437:6635:42760:30447:6631:6084:55085:42183:55114:16558:9062:45733:15867:6540:6546:6066:15976:6637:30437:15758:6536:16560:45333:15942:43605:9450:19631:42758:34599:8643:6097:44011:7031:42318:6625:9405
55114	oxidation-reduction process	77 out of 575 genes, 13.4%	354 out of 5259 background genes, 6.7%	7.11e-07	0	ALK8:PEX11:FOX2:UCF1:SMM1:orf19.1366:orf19.1461:POX1-3:PXP2:ACS1:GPD1:CFL4:CYC3:orf19.2175:GDH2:orf19.225:COX7:orf19.2282:orf19.2284:ADH5:orf19.3045:DAO1:OYE32:orf19.3139:AMO2:orf19.345:orf19.3544:IDP2:PPG1:SCS7:PUT2:orf19.4122:orf19.4273:PUT1:CIT1:orf19.4449:orf19.4504:CTN1:CAT2:ERG251:OSM2:orf19.541:orf19.5565:FRP1:PEX5:orf19.5728:AMO1:ALD5:SUR2:orf19.6066:HMX1:orf19.6143:CAT1:ANT1:FDH1:ECI1:or…	9060:30448:5975:71210:9437:51701:71248:6081:9712:6635:44262:15677:42760:33215:6099:36245:30447:6084:6801:6631:71475:46356:71454:45454:6102:6116:6123:10106:1315:71216:42183:55114:6520:6744:16558:6537:71494:9062:45733:10430:6979:34641:15867:6540:6546:10133:6807:45329:6066:304:6827:90002:19413:6114:15976:19654:6400:15680:6637:6915:6085:42744:16560:45333:7094:30148:6101:44182:5977:36180:6112:15942:42…
15893	drug transport	18 out of 575 genes, 3.1%	33 out of 5259 background genes, 0.6%	8.26e-07	0	orf19.1308:CDR3:FCY21:orf19.136:SGE1:NAG3:NAG4:orf19.341:CNT:orf19.4550:TPO4:orf19.4779:MDR1:FLU1:orf19.6691:TPO2:orf19.7336:orf19.7648	8655:15749:15802:15833:55085:15903:6863:32975:15861:71216:72530:6556:6855:15893:15847:15858:10509:8645:46618:34599:15848:15862:6810:42493:15809:45332:296:9405:35690:15856
9062	fatty acid catabolic process	12 out of 575 genes, 2.1%	15 out of 5259 background genes, 0.3%	8.72e-07	0	FOX2:POX1-3:PXP2:orf19.4122:SPS20:CAT2:MLS1:PEX5:ANT1:ECI1:ICL1:POT1	9437:6635:42760:30447:6631:6084:16558:9062:45733:15867:15976:6637:30437:16560:45333:42758:6097:44011:7031:42318:6625:9405
16054	organic acid catabolic process	25 out of 575 genes, 4.3%	64 out of 5259 background genes, 1.2%	3.64e-06	0	FOX2:POX1-3:PXP2:ARO10:HGT14:ARO80:orf19.345:ALT1:CAR1:PUT2:orf19.4122:SPS20:PUT1:CTN1:CAT2:MLS1:LAP3:PEX5:CAR2:ANT1:FDH1:ECI1:ICL1:POT1:UGA1	30448:9437:6635:45944:42760:30447:6631:6084:55085:6591:42183:55114:6559:16558:6537:9062:45733:9074:15867:6540:6546:10133:6066:6552:15976:6637:949:1300:30437:15758:6536:16560:45333:90368:15942:43605:6527:6523:6561:9450:19631:6351:42758:46677:6524:34599:8643:6097:44011:122:19547:7031:951:950:43418:42318:6508:6569:6625:35690:9405
46395	carboxylic acid catabolic process	25 out of 575 genes, 4.3%	64 out of 5259 background genes, 1.2%	3.64e-06	0	FOX2:POX1-3:PXP2:ARO10:HGT14:ARO80:orf19.345:ALT1:CAR1:PUT2:orf19.4122:SPS20:PUT1:CTN1:CAT2:MLS1:LAP3:PEX5:CAR2:ANT1:FDH1:ECI1:ICL1:POT1:UGA1	30448:9437:6635:45944:42760:30447:6631:6084:55085:6591:42183:55114:6559:16558:6537:9062:45733:9074:15867:6540:6546:10133:6066:6552:15976:6637:949:1300:30437:15758:6536:16560:45333:90368:15942:43605:6527:6523:6561:9450:19631:6351:42758:46677:6524:34599:8643:6097:44011:122:19547:7031:951:950:43418:42318:6508:6569:6625:35690:9405
32787	monocarboxylic acid metabolic process	33 out of 575 genes, 5.7%	104 out of 5259 background genes, 2.0%	6.01e-06	0	ALK8:PEX11:FOX2:POX1-3:PXP2:ACS1:HGT14:FAA21:CTN3:ACH1:orf19.345:FAT1:SCS7:orf19.4122:SPS20:CTN1:CAT2:ERG251:MLS1:CYB2:PEX5:ALD5:SUR2:ANT1:FDH1:ECI1:PEX1:ICL1:orf19.7131:POT1:ERG3:UGA1:UGA11	71469:36178:71210:9437:6635:42760:30447:6084:6631:19679:55085:10034:42183:55114:71216:16558:6089:9448:9062:45733:52002:10430:15867:6540:6546:45329:6066:90002:19413:15976:6083:19654:6637:6085:36244:30437:44410:15758:6536:16560:45333:1676:30148:44182:36180:15942:43605:6696:9450:48252:16562:19631:42758:34599:8643:6097:19395:44011:16573:7031:15909:71585:71276:6675:42318:19427:38:16559:35690:6625:9405…
44282	small molecule catabolic process	27 out of 575 genes, 4.7%	78 out of 5259 background genes, 1.5%	1.86e-05	0	FOX2:POX1-3:PXP2:ARO10:HGT14:ARO80:orf19.345:ALT1:CAR1:PUT2:orf19.4122:SPS20:PUT1:CTN1:CAT2:MLS1:LAP3:PEX5:CAR2:ANT1:ARD:FDH1:ECI1:ICL1:POT1:DUR1,2:UGA1	71469:30448:9437:19740:6635:45944:42760:30447:6631:6084:55085:19571:43419:6591:42183:55114:6559:16558:6537:9062:45733:9074:15867:6540:6546:10133:6066:6552:15976:6637:949:19528:1300:30437:15758:6536:16560:45333:90368:15942:43605:6527:6523:6561:9450:19631:6351:42758:46677:6524:34599:8643:6097:44011:122:19547:7031:951:950:43418:42318:6508:6569:6625:35690:9405
6635	fatty acid beta-oxidation	9 out of 575 genes, 1.6%	10 out of 5259 background genes, 0.2%	1.89e-05	0	FOX2:POX1-3:PXP2:orf19.4122:CAT2:PEX5:ANT1:ECI1:POT1	9437:6635:42760:30447:6631:6084:16558:9062:45733:15867:15976:6637:16560:45333:42758:6097:44011:7031:42318:6625:9405
44712	single-organism catabolic process	27 out of 575 genes, 4.7%	79 out of 5259 background genes, 1.5%	2.55e-05	0	FOX2:POX1-3:PXP2:ARO10:HGT14:ARO80:orf19.345:ALT1:CAR1:PUT2:orf19.4122:SPS20:PUT1:CTN1:CAT2:MLS1:LAP3:PEX5:CAR2:ANT1:ARD:FDH1:ECI1:ICL1:POT1:DUR1,2:UGA1	71469:30448:9437:19740:6635:45944:42760:30447:6631:6084:55085:19571:43419:6591:42183:55114:6559:16558:6537:9062:45733:9074:15867:6540:6546:10133:6066:6552:15976:6637:949:19528:1300:30437:15758:6536:16560:45333:90368:15942:43605:6527:6523:6561:9450:19631:6351:42758:46677:6524:34599:8643:6097:44011:122:19547:7031:951:950:43418:42318:6508:6569:6625:35690:9405
3333	amino acid transmembrane transport	17 out of 575 genes, 3.0%	36 out of 5259 background genes, 0.7%	4.23e-05	0	GNP1:orf19.1308:DIP5:PUT4:HIP1:orf19.321:AGP3:GAP1:GAP4:orf19.4940:MUP1:OPT7:GAP6:GAP2:orf19.7056:orf19.7566:CAN1	6791:70778:43091:15802:15813:30447:55085:32975:6808:15893:15846:34226:44182:44690:15809:3333:34775:42939:6865:42883:35690
15849	organic acid transport	26 out of 575 genes, 4.5%	80 out of 5259 background genes, 1.5%	0.00014	0	GNP1:FRP3:orf19.1308:orf19.1867:DIP5:PUT4:HIP1:orf19.321:FAT1:AGP3:GAP1:orf19.4337:GAP4:orf19.4779:orf19.4940:MUP1:JEN2:OPT7:orf19.5720:GAP6:orf19.6976:GAP2:orf19.7056:JEN1:orf19.7566:CAN1	6791:15727:70778:19740:43091:15802:35879:15813:30447:6849:55085:32975:6808:6847:15884:15743:97080:15893:15718:15846:34226:44182:44690:6835:15696:15809:3333:34775:42939:15909:6865:38:42883:35690
46942	carboxylic acid transport	26 out of 575 genes, 4.5%	80 out of 5259 background genes, 1.5%	0.00014	0	GNP1:FRP3:orf19.1308:orf19.1867:DIP5:PUT4:HIP1:orf19.321:FAT1:AGP3:GAP1:orf19.4337:GAP4:orf19.4779:orf19.4940:MUP1:JEN2:OPT7:orf19.5720:GAP6:orf19.6976:GAP2:orf19.7056:JEN1:orf19.7566:CAN1	6791:15727:70778:19740:43091:15802:35879:15813:30447:6849:55085:32975:6808:6847:15884:15743:97080:15893:15718:15846:34226:44182:44690:6835:15696:15809:3333:34775:42939:15909:6865:38:42883:35690
6631	fatty acid metabolic process	22 out of 575 genes, 3.8%	61 out of 5259 background genes, 1.2%	0.00017	0	ALK8:PEX11:FOX2:POX1-3:PXP2:FAA21:ACH1:FAT1:SCS7:orf19.4122:SPS20:CAT2:ERG251:MLS1:PEX5:SUR2:ANT1:ECI1:PEX1:ICL1:POT1:ERG3	71469:71210:9437:6635:42760:30447:6084:6631:19679:10034:71216:55114:16558:9062:45733:10430:15867:90002:15976:6083:6637:30437:16560:45333:1676:30148:44182:36180:6696:48252:16562:42758:6097:19395:44011:7031:15909:71585:71276:6675:42318:38:16559:35690:6625:9405:6633
6820	anion transport	37 out of 575 genes, 6.4%	147 out of 5259 background genes, 2.8%	0.00062	0	GNP1:FRP3:orf19.1308:CDR3:orf19.1867:XUT1:orf19.2898:DIP5:PUT4:HIP1:orf19.321:orf19.3232:GIT1:FAT1:GEF2:AGP3:GAP1:orf19.4337:GAP4:orf19.4779:orf19.4940:DAL7:MUP1:JEN2:OPT7:orf19.5720:ANT1:orf19.6522:GAP6:DAL9:orf19.6976:GAP2:orf19.7056:JEN1:orf19.7566:orf19.7666:CAN1	6791:15727:70778:6635:19740:43091:15802:35879:15794:15813:30447:6821:6849:55085:42906:6820:32975:15851:6808:6847:15884:15743:15867:97080:15893:15718:15846:46713:6623:34226:44182:44690:6835:15696:6817:46618:1407:15747:6810:15809:3333:34775:42939:7031:15909:45332:6865:38:42883:35690:6878
6865	amino acid transport	19 out of 575 genes, 3.3%	51 out of 5259 background genes, 1.0%	0.00067	0	GNP1:orf19.1308:DIP5:PUT4:HIP1:orf19.321:AGP3:GAP1:GAP4:orf19.4779:orf19.4940:MUP1:OPT7:GAP6:orf19.6976:GAP2:orf19.7056:orf19.7566:CAN1	6791:70778:43091:15802:15813:30447:55085:32975:6808:15884:15893:15846:34226:44182:44690:15809:3333:34775:42939:6865:42883:35690
44242	cellular lipid catabolic process	14 out of 575 genes, 2.4%	30 out of 5259 background genes, 0.6%	0.00081	0	FOX2:POX1-3:PXP2:orf19.4122:SPS20:CAT2:orf19.4699:MLS1:PLC1:PEX5:ANT1:ECI1:ICL1:POT1	9437:6635:42760:30447:6631:6084:1402:9395:6642:16558:9062:45733:15867:7114:34501:32958:15976:19433:35556:6637:30437:16560:45333:44182:34644:42758:6097:44011:51783:7031:7165:71276:71585:42318:6625:9405
6811	ion transport	52 out of 575 genes, 9.0%	250 out of 5259 background genes, 4.8%	0.00224	0	GNP1:FRP3:orf19.1308:CDR3:orf19.1655.3:orf19.1867:CFL4:COX17:SMF3:XUT1:orf19.2898:DIP5:PUT4:HIP1:orf19.321:orf19.3232:GIT1:CTR1:FAT1:GEF2:AGP3:GAP1:orf19.4337:orf19.4449:GAP4:HSP30:TPO4:orf19.4779:FTH1:orf19.4940:DAL7:MUP1:JEN2:FRP1:RCH1:OPT7:orf19.5720:ANT1:orf19.6522:FLU1:GAP6:DAL9:orf19.6976:GAP2:orf19.7056:orf19.7077:FTR1:JEN1:orf19.7566:orf19.7666:DUR31:CAN1	6791:15727:15840:71248:70778:6635:19740:43091:15802:35879:15794:15677:33215:15833:15813:30447:6801:6821:6849:55085:42906:32780:15903:6820:10106:32975:71216:55114:15851:6808:6847:15884:6855:15743:15867:97080:15893:15718:6950:6827:15846:15847:46713:15680:6825:6623:44117:34226:44182:70509:44690:6835:15696:6817:46618:1407:6812:6811:15747:15848:6826:6810:6897:15809:3333:34775:42939:7031:15909:45332:68…
15711	organic anion transport	30 out of 575 genes, 5.2%	115 out of 5259 background genes, 2.2%	0.00334	0	GNP1:FRP3:orf19.1308:CDR3:orf19.1867:XUT1:DIP5:PUT4:HIP1:orf19.321:GIT1:FAT1:AGP3:GAP1:orf19.4337:GAP4:orf19.4779:orf19.4940:MUP1:JEN2:OPT7:orf19.5720:ANT1:GAP6:orf19.6976:GAP2:orf19.7056:JEN1:orf19.7566:CAN1	6791:15727:70778:6635:19740:43091:15802:35879:15794:15813:30447:6849:55085:42906:32975:15851:6808:6847:15884:15743:15867:97080:15893:15718:15846:34226:44182:44690:6835:15696:6817:46618:1407:15747:6810:15809:3333:34775:42939:7031:15909:45332:6865:38:42883:35690
16042	lipid catabolic process	14 out of 575 genes, 2.4%	33 out of 5259 background genes, 0.6%	0.00336	0	FOX2:POX1-3:PXP2:orf19.4122:SPS20:CAT2:orf19.4699:MLS1:PLC1:PEX5:ANT1:ECI1:ICL1:POT1	9437:6635:42760:30447:6631:6084:1402:9395:6642:16558:9062:45733:15867:7114:34501:32958:15976:19433:35556:6637:30437:16560:45333:44182:34644:42758:6097:44011:51783:7031:7165:71276:71585:42318:6625:9405
Molecular Function
GOID	GO_term	Cluster frequency	Background frequency	Corrected P-value	False discovery rate	Gene(s) annotated to the term	Directly Annotated GOID List
22857	transmembrane transporter activity	67 out of 575 genes, 11.7%	295 out of 5259 background genes, 5.6%	4.94e-07	0	GNP1:FRP3:orf19.1308:CDR3:FCY21:orf19.136:orf19.1867:SGE1:HGT8:NAG3:NAG4:SIT1:COX7:OPT1:HGT14:XUT1:orf19.2898:DIP5:PUT4:HIP1:orf19.321:orf19.3232:GIT1:orf19.341:CTR1:GEF2:AGP3:MAL31:orf19.4090:CNT:orf19.4174:GAP1:orf19.4337:GAP4:HSP30:orf19.4550:HGT17:TPO4:orf19.4779:orf19.4940:DAL7:MUP1:JEN2:NGT1:HGT19:MDR1:orf19.5720:HGT10:ANT1:orf19.6522:FLU1:GAP6:orf19.6691:PTR22:DAL9:GAP2:orf19.7056:HGT13:TP…	15182:15123:102:5313:5506:5507:42937:5247:15169:15296:51119:297:15293:15203:15204:15191:5216:5355:42936:5290:15606:5215:5452:15391:16597:4129:15297:35673:5548:295:97079:15194:15238:8028:5415:15140:42907:5524:80139:5381:15306:15145:42626:15535:71916:15093:10174:15212:34257:15193:15181:15355:8519:8559:15489:42929:15244:15174:15188:15183:15129:15572:2060:15343:5315:15295:5427:15205:1406:15143:15197:…
15238	drug transmembrane transporter activity	18 out of 575 genes, 3.1%	34 out of 5259 background genes, 0.6%	5.01e-07	0	orf19.1308:FCY21:orf19.136:SGE1:NAG3:NAG4:orf19.341:CNT:orf19.4550:TPO4:orf19.4779:MDR1:FLU1:orf19.6691:TPO2:orf19.7336:orf19.7648:CAN1	15182:297:15293:15203:5290:15606:16597:15297:15238:5415:15145:10174:15212:15181:8559:15244:15174:15188:15205:15189
90484	drug transporter activity	18 out of 575 genes, 3.1%	34 out of 5259 background genes, 0.6%	5.01e-07	0	orf19.1308:FCY21:orf19.136:SGE1:NAG3:NAG4:orf19.341:CNT:orf19.4550:TPO4:orf19.4779:MDR1:FLU1:orf19.6691:TPO2:orf19.7336:orf19.7648:CAN1	15182:297:15293:15203:5290:15606:16597:15297:15238:5415:15145:10174:15212:15181:8559:15244:15174:15188:15205:15189
16491	oxidoreductase activity	75 out of 575 genes, 13.0%	352 out of 5259 background genes, 6.7%	1.04e-06	0	ALK8:FOX2:SMM1:orf19.1366:orf19.1461:POX1-3:PXP2:GPD1:CFL4:TRX2:orf19.2114:orf19.2175:GDH2:orf19.225:COX7:orf19.2282:orf19.2284:ADH5:AHP1:orf19.3045:DAO1:OYE32:orf19.3139:AMO2:orf19.345:orf19.3544:GTT12:IDP2:SCS7:PUT2:SPS20:PUT1:orf19.4504:ERG251:orf19.4843:CYB2:OSM2:orf19.541:orf19.5565:AYR2:FRP1:orf19.5728:orf19.5763:AMO1:ALD5:SUR2:orf19.5879:orf19.604:orf19.6066:HMX1:orf19.6143:CAT1:ARD:FDH1:o…	170:4460:51287:5506:8270:5507:4090:16722:8692:16641:16491:16614:16747:16620:47770:8379:4364:4129:18685:3997:4096:4491:18576:5515:8199:48038:5496:4616:3857:4300:20037:293:3842:50660:4392:8131:9013:16616:4352:4367:8670:3995:16712:4030:9055:47066:8785:42803:4602:4846:104:8336:19825:4657:4450:16175:10181:80132:248:50662:16706:42602:17150:8863:16156:15035:47002
5215	transporter activity	74 out of 575 genes, 12.9%	364 out of 5259 background genes, 6.9%	1.13e-05	0	GNP1:FRP3:orf19.1308:CDR3:FCY21:orf19.136:orf19.1867:SGE1:HGT8:SMF3:NAG3:NAG4:SIT1:COX7:PTR2:OPT1:HGT14:XUT1:orf19.2898:DIP5:PUT4:HIP1:orf19.321:orf19.3232:GIT1:orf19.341:CTR1:FAT1:GEF2:AGP3:MAL31:orf19.4090:CNT:orf19.4174:GAP1:orf19.4337:GAP4:HSP30:orf19.4550:HGT17:TPO4:orf19.4779:orf19.4940:DAL7:MUP1:JEN2:NGT1:HGT19:MDR1:OPT7:DUR4:orf19.5720:HGT10:OPT8:ANT1:orf19.6522:FLU1:GAP6:orf19.6691:PTR22…	15182:15123:102:5313:5506:5507:42937:5247:15169:15296:51119:297:15293:15203:15204:15191:5216:5355:42936:5290:15606:5215:5452:15391:16597:4129:15297:35673:5548:295:31957:97079:15194:15238:8028:8517:5415:15140:42907:80139:5524:5381:15306:15145:42626:15198:71916:15535:5324:15093:10174:34257:15212:15193:15181:15355:8559:8519:15489:15244:42929:15174:15188:15183:15129:15572:2060:15343:5315:15295:5427:1…
5342	organic acid transmembrane transporter activity	23 out of 575 genes, 4.0%	65 out of 5259 background genes, 1.2%	4.3e-05	0	GNP1:FRP3:orf19.1308:orf19.1867:XUT1:DIP5:PUT4:HIP1:orf19.321:AGP3:GAP1:orf19.4337:GAP4:orf19.4940:MUP1:JEN2:orf19.5720:GAP6:GAP2:orf19.7056:JEN1:orf19.7566:CAN1	15182:15123:102:5313:15203:15191:5290:15391:16597:97079:15194:15238:8028:15140:42907:15306:15193:15181:15355:8519:15174:15188:15183:15129:2060:15143:15171:15189:5310
8509	anion transmembrane transporter activity	31 out of 575 genes, 5.4%	106 out of 5259 background genes, 2.0%	4.61e-05	0	GNP1:FRP3:orf19.1308:orf19.1867:orf19.2898:DIP5:PUT4:HIP1:orf19.321:orf19.3232:GIT1:GEF2:AGP3:GAP1:orf19.4337:GAP4:orf19.4940:DAL7:MUP1:JEN2:orf19.5720:ANT1:orf19.6522:GAP6:DAL9:GAP2:orf19.7056:JEN1:orf19.7566:orf19.7666:CAN1	15182:15123:102:5313:5247:15169:15296:15203:15191:5290:5452:16597:295:97079:15194:15238:8028:15140:80139:15306:15193:15181:15355:8519:15174:15188:15183:15129:5315:1406:15171:15189:5310
22891	substrate-specific transmembrane transporter activity	57 out of 575 genes, 9.9%	263 out of 5259 background genes, 5.0%	5.21e-05	0	GNP1:FRP3:orf19.1308:FCY21:orf19.136:orf19.1867:HGT8:NAG3:NAG4:SIT1:COX7:OPT1:HGT14:XUT1:orf19.2898:DIP5:PUT4:HIP1:orf19.321:orf19.3232:GIT1:CTR1:GEF2:AGP3:MAL31:orf19.4090:CNT:orf19.4174:GAP1:orf19.4337:GAP4:HSP30:HGT17:TPO4:orf19.4940:DAL7:MUP1:JEN2:NGT1:HGT19:orf19.5720:HGT10:ANT1:orf19.6522:FLU1:GAP6:PTR22:DAL9:GAP2:orf19.7056:HGT13:FTR1:JEN1:orf19.7566:orf19.7666:DUR31:CAN1	15182:15123:102:5313:5506:5507:42937:5247:15169:15296:51119:297:15293:15203:15204:15191:5216:5355:42936:5290:15606:5452:15391:16597:4129:35673:295:97079:15194:15238:8028:5415:15140:42907:80139:5381:15306:15145:71916:15535:15093:10174:34257:15212:15193:15181:15355:8519:15489:42929:15174:15188:15183:15129:15572:2060:15343:5315:15295:5427:1406:15205:15143:15088:15197:15171:15189:1901584:5310
46943	carboxylic acid transmembrane transporter activity	22 out of 575 genes, 3.8%	63 out of 5259 background genes, 1.2%	0.0001	0	GNP1:FRP3:orf19.1308:orf19.1867:DIP5:PUT4:HIP1:orf19.321:AGP3:GAP1:orf19.4337:GAP4:orf19.4940:MUP1:JEN2:orf19.5720:GAP6:GAP2:orf19.7056:JEN1:orf19.7566:CAN1	15182:15123:102:5313:15203:15191:5290:16597:97079:15194:15238:8028:15140:15306:15193:15181:15355:8519:15174:15188:15183:15129:15171:15189:5310
15144	carbohydrate transmembrane transporter activity	12 out of 575 genes, 2.1%	22 out of 5259 background genes, 0.4%	0.00019	0	HGT8:NAG3:NAG4:HGT14:MAL31:orf19.4090:HGT17:JEN2:HGT19:HGT10:HGT13:JEN1	51119:5355:97079:15238:8028:15306:15145:15535:15355:15129:15295:5310
1901476	carbohydrate transporter activity	12 out of 575 genes, 2.1%	22 out of 5259 background genes, 0.4%	0.00019	0	HGT8:NAG3:NAG4:HGT14:MAL31:orf19.4090:HGT17:JEN2:HGT19:HGT10:HGT13:JEN1	51119:5355:97079:15238:8028:15306:15145:15535:15355:15129:15295:5310
51119	sugar transmembrane transporter activity	12 out of 575 genes, 2.1%	22 out of 5259 background genes, 0.4%	0.00019	0	HGT8:NAG3:NAG4:HGT14:MAL31:orf19.4090:HGT17:JEN2:HGT19:HGT10:HGT13:JEN1	51119:5355:97079:15238:8028:15306:15145:15535:15355:15129:15295:5310
16289	CoA hydrolase activity	6 out of 575 genes, 1.0%	6 out of 5259 background genes, 0.1%	0.00052	0	orf19.3029:ACH1:orf19.4122:TES15:orf19.5216:TES1	4778:3986:3860:47617:8775
15171	amino acid transmembrane transporter activity	16 out of 575 genes, 2.8%	40 out of 5259 background genes, 0.8%	0.00054	0	GNP1:orf19.1308:DIP5:PUT4:HIP1:orf19.321:AGP3:GAP1:GAP4:orf19.4940:MUP1:GAP6:GAP2:orf19.7056:orf19.7566:CAN1	15182:102:5313:15203:15191:5290:16597:15194:15238:15193:15181:15174:15188:15183:15171:15189
22892	substrate-specific transporter activity	62 out of 575 genes, 10.8%	317 out of 5259 background genes, 6.0%	0.00066	0	GNP1:FRP3:orf19.1308:CDR3:FCY21:orf19.136:orf19.1867:HGT8:NAG3:NAG4:SIT1:COX7:PTR2:OPT1:HGT14:XUT1:orf19.2898:DIP5:PUT4:HIP1:orf19.321:orf19.3232:GIT1:CTR1:FAT1:GEF2:AGP3:MAL31:orf19.4090:CNT:orf19.4174:GAP1:orf19.4337:GAP4:HSP30:HGT17:TPO4:orf19.4940:DAL7:MUP1:JEN2:NGT1:HGT19:OPT7:orf19.5720:HGT10:OPT8:ANT1:orf19.6522:FLU1:GAP6:PTR22:DAL9:GAP2:orf19.7056:HGT13:FTR1:JEN1:orf19.7566:orf19.7666:DUR…	15182:15123:102:5313:5506:5507:42937:5247:15169:15296:51119:297:15293:15203:15204:15191:5216:5355:42936:5290:15606:5215:5452:15391:16597:4129:35673:5548:295:31957:97079:15194:15238:8028:5415:15140:42907:80139:5524:5381:15306:15145:42626:15198:71916:15535:5324:15093:10174:34257:15212:15193:15181:15355:8519:15489:42929:15174:15188:15183:15129:15572:2060:15343:5315:15295:5427:1406:15205:15143:15088:…
8514	organic anion transmembrane transporter activity	24 out of 575 genes, 4.2%	80 out of 5259 background genes, 1.5%	0.00073	0	GNP1:FRP3:orf19.1308:orf19.1867:DIP5:PUT4:HIP1:orf19.321:GIT1:AGP3:GAP1:orf19.4337:GAP4:orf19.4940:MUP1:JEN2:orf19.5720:ANT1:GAP6:GAP2:orf19.7056:JEN1:orf19.7566:CAN1	15182:15123:102:5313:15169:15203:15191:5290:16597:295:97079:15194:15238:8028:15140:15306:15193:15181:15355:8519:15174:15188:15183:15129:5315:1406:15171:15189:5310
15293	symporter activity	11 out of 575 genes, 1.9%	23 out of 5259 background genes, 0.4%	0.00302	0	XUT1:orf19.3232:orf19.4090:CNT:DAL7:JEN2:HGT10:orf19.6522:DAL9:JEN1:orf19.7666	15296:51119:15293:5355:15391:97079:15238:8028:5415:42907:15306:15535:10174:15355:15129:2060:15295:15143:5310
15294	solute:cation symporter activity	11 out of 575 genes, 1.9%	23 out of 5259 background genes, 0.4%	0.00302	0	XUT1:orf19.3232:orf19.4090:CNT:DAL7:JEN2:HGT10:orf19.6522:DAL9:JEN1:orf19.7666	15296:51119:15293:5355:15391:97079:15238:8028:5415:42907:15306:15535:10174:15355:15129:2060:15295:15143:5310
15145	monosaccharide transmembrane transporter activity	9 out of 575 genes, 1.6%	16 out of 5259 background genes, 0.3%	0.00374	0	HGT8:NAG3:NAG4:HGT14:orf19.4090:HGT17:HGT19:HGT10:HGT13	51119:5355:15238:15145:15535:15295
16712	oxidoreductase activity, acting on paired donors, with incorporation or reduction of molecular oxygen, reduced flavin or flavoprotein as one donor, and incorporation of one atom of oxygen	5 out of 575 genes, 0.9%	5 out of 5259 background genes, 0.1%	0.00486	0	ALK8:orf19.5728:ALK6:orf19.7512:ALK2	5506:18685:20037:16712:9055:19825
15179	L-amino acid transmembrane transporter activity	9 out of 575 genes, 1.6%	17 out of 5259 background genes, 0.3%	0.00718	0	GNP1:orf19.1308:DIP5:orf19.321:AGP3:GAP1:MUP1:GAP2:CAN1	15182:102:5313:15203:15191:5290:16597:15194:15238:15193:15181:15174:15188:15183:15171:15189
15291	secondary active transmembrane transporter activity	17 out of 575 genes, 3.0%	53 out of 5259 background genes, 1.0%	0.00842	0	OPT1:XUT1:orf19.2898:orf19.3232:GIT1:orf19.4090:CNT:DAL7:MUP1:JEN2:HGT10:orf19.6522:orf19.6691:DAL9:JEN1:orf19.7648:orf19.7666	102:15169:15296:51119:15293:5355:5452:15391:15297:35673:97079:15238:8028:5415:42907:80139:15306:15535:10174:15355:15129:2060:5315:15295:5427:1406:15143:15197:1901584:5310
15075	ion transmembrane transporter activity	43 out of 575 genes, 7.5%	212 out of 5259 background genes, 4.0%	0.01061	0	GNP1:FRP3:orf19.1308:orf19.1867:SIT1:COX7:XUT1:orf19.2898:DIP5:PUT4:HIP1:orf19.321:orf19.3232:GIT1:CTR1:GEF2:AGP3:orf19.4090:CNT:GAP1:orf19.4337:GAP4:HSP30:TPO4:orf19.4940:DAL7:MUP1:JEN2:orf19.5720:HGT10:ANT1:orf19.6522:FLU1:GAP6:DAL9:GAP2:orf19.7056:FTR1:JEN1:orf19.7566:orf19.7666:DUR31:CAN1	15182:15123:102:5313:5506:5507:5247:15169:15296:51119:15203:297:15293:15204:15191:5355:5216:5290:15606:5452:15391:16597:4129:295:97079:15194:15238:8028:5415:15140:42907:80139:5381:15306:15535:15093:10174:15193:15181:15355:8519:15489:42929:15174:15188:15183:15129:2060:15343:5315:15295:1406:15143:15088:15171:15189:5310
20037	heme binding	12 out of 575 genes, 2.1%	33 out of 5259 background genes, 0.6%	0.03344	0	ALK8:orf19.1397:SCS7:orf19.4459:CYB2:OSM2:orf19.5728:CAT1:ALK6:CSA1:orf19.7512:ALK2	4460:5506:18685:4096:5515:20037:16712:9055:104:19825:80132:16156
Cellular Component
GOID	GO_term	Cluster frequency	Background frequency	Corrected P-value	False discovery rate	Gene(s) annotated to the term	Directly Annotated GOID List
42579	microbody	37 out of 575 genes, 6.4%	82 out of 5259 background genes, 1.6%	3.66e-13	0	PEX11:FOX2:orf19.1448.1:orf19.164:POX1-3:PXP2:GPD1:orf19.1777:PEX12:FAA21:CTN3:ACH1:FAT1:PEX4:orf19.4122:SPS20:CIT1:CAT2:MLS1:CYB2:OSM2:TES1:orf19.5449:PEX5:SRR1:CAT1:ANT1:AAT21:ECI1:PEX1:PNC1:orf19.6830:orf19.6838:ICL1:orf19.7288:POT1:orf19.86	5737:5829:5758:5777:5739:5783:5938:5782:5868:30133:5779:9514:16021:5881:5759:31235:9277:5643:5634:32153:5778:5811:5576:9331
5777	peroxisome	37 out of 575 genes, 6.4%	82 out of 5259 background genes, 1.6%	3.66e-13	0	PEX11:FOX2:orf19.1448.1:orf19.164:POX1-3:PXP2:GPD1:orf19.1777:PEX12:FAA21:CTN3:ACH1:FAT1:PEX4:orf19.4122:SPS20:CIT1:CAT2:MLS1:CYB2:OSM2:TES1:orf19.5449:PEX5:SRR1:CAT1:ANT1:AAT21:ECI1:PEX1:PNC1:orf19.6830:orf19.6838:ICL1:orf19.7288:POT1:orf19.86	5737:5829:5758:5777:5739:5783:5938:5782:5868:30133:5779:9514:16021:5881:5759:31235:9277:5643:32153:5634:5778:5811:5576:9331
9514	glyoxysome	15 out of 575 genes, 2.6%	28 out of 5259 background genes, 0.5%	4.87e-06	0	FOX2:FAA21:ACH1:CIT1:CAT2:MLS1:CYB2:OSM2:TES1:ANT1:orf19.6830:orf19.6838:ICL1:orf19.7288:POT1	5829:5758:5777:5739:5782:5779:9514:5634
31907	microbody lumen	9 out of 575 genes, 1.6%	11 out of 5259 background genes, 0.2%	1.49e-05	0	orf19.164:POX1-3:SPS20:MLS1:SRR1:CAT1:ICL1:POT1:orf19.86	5737:5829:5758:5739:5777:5782:9514:5759:9277:5634
5782	peroxisomal matrix	9 out of 575 genes, 1.6%	11 out of 5259 background genes, 0.2%	1.49e-05	0	orf19.164:POX1-3:SPS20:MLS1:SRR1:CAT1:ICL1:POT1:orf19.86	5737:5829:5758:5739:5777:5782:9514:5759:9277:5634
44438	microbody part	14 out of 575 genes, 2.4%	30 out of 5259 background genes, 0.6%	0.00012	0	PEX11:orf19.164:POX1-3:PEX12:SPS20:MLS1:PEX5:SRR1:CAT1:ANT1:PEX1:ICL1:POT1:orf19.86	5737:5829:5758:5777:5739:5783:5782:5779:9514:5759:9277:5634:5778
44439	peroxisomal part	14 out of 575 genes, 2.4%	30 out of 5259 background genes, 0.6%	0.00012	0	PEX11:orf19.164:POX1-3:PEX12:SPS20:MLS1:PEX5:SRR1:CAT1:ANT1:PEX1:ICL1:POT1:orf19.86	5737:5829:5758:5777:5739:5783:5782:5779:9514:5759:9277:5634:5778

## Sheet: Downregulated in Biofilm
Table S4. Gene Ontology results for genes downregulated in biofilms compared to planktonic cells.
Legend:
GOID:	Gene Ontology ID as annotated in the Candida Genome Database (CGD) for C. parapsilosis
GO_term	Gene Ontology term associated to GOID
Biological Process
GOID	GO_term	Cluster frequency	Background frequency	Corrected P-value	False discovery rate	Gene(s) annotated to the term	Directly Annotated GOID List
6412	translation	125 out of 630 genes, 19.8%	239 out of 5259 background genes, 4.5%	2.02e-52	0	VAS1:orf19.1409.1:TEF1:RPS26A:RPL3:RPL12:RPS7A:orf19.1967:RPL11:orf19.2275:RPL2:RPL29:RPS17B:RPL9B:orf19.2382:DPS1-1:orf19.2438:orf19.2478.1:orf19.2520:CDC60:orf19.2650.1:CAM1-1:SES1:TYS1:RPL28:RPL10:TIF34:RPP1A:RPL13:RPS16A:RPS1:RPL6:orf19.3061.1:UBI3:TMA19:TIF:RPS21B:RPS21:orf19.3367:RPL32:RPL10A:RPL23A:MRPL10:ERF1:orf19.3572.3:orf19.3690.2:EFB1:RPL43A:orf19.4018:HTS1:GCD6:orf19.4149.1:CEF3:RPS…	398:43936:9060:6413:51701:723:32968:6353:30447:27:6631:6427:42274:463:43558:6429:447:6434:462:6421:42254:71216:6433:43066:7163:6437:70150:6995:6450:56:17148:910:2:469:36180:31929:6406:16567:6414:71470:2109:7005:32543:2000805:28:32006:30490:6446:6422:34599:9267:6436:2181:6419:33108:6412:16070:6438:45903:461:2188:6415:479:6409:6424:70321:6407:36170:6428:35690:6435
1901576	organic substance biosynthetic process	261 out of 630 genes, 41.4%	1123 out of 5259 background genes, 21.4%	2.51e-31	0	HHF1:ACS2:orf19.1110:orf19.1137:VRG4:HOM3:VAS1:orf19.1409.1:TEF1:APT1:RPS26A:STT3:orf19.1495:POB3:RPL3:RPL12:RAD50:RPS7A:RKI1:orf19.1761:LYS1:HIS3:HHT2:HHF22:orf19.1967:ARO2:CDC45:orf19.200:ATP18:RPL11:SPE3:RFA2:orf19.2275:WBP1:orf19.2306:RPL2:RPL29:RPS17B:RPL9B:MIS11:POL2:orf19.2382:SSU72:DPS1-1:orf19.2438:orf19.2478.1:orf19.2520:LYS12:orf19.2529:TRP2:MET6:CDC60:orf19.2650.1:CAM1-1:SES1:TYS1:RPC…	32:60261:6974:6261:32889:71163:1178:45944:70602:84:30447:30491:7049:463:48478:6281:16126:48315:55085:43558:6567:6429:71361:7004:9272:6434:6227:9097:70791:722:42766:42254:71712:9052:8615:45461:30174:43066:71459:9113:45899:1900101:6546:46081:9085:2001165:6165:8295:6233:35955:2001209:6038:9082:76:6090:31494:1901319:6564:44182:6334:917:727:31929:6273:71470:61392:42276:6351:15784:6366:30702:18065:3046…
44249	cellular biosynthetic process	256 out of 630 genes, 40.6%	1100 out of 5259 background genes, 20.9%	1.37e-30	0	HHF1:ACS2:orf19.1110:orf19.1137:VRG4:HOM3:VAS1:orf19.1409.1:TEF1:APT1:RPS26A:STT3:orf19.1495:POB3:RPL3:RPL12:RAD50:RPS7A:RKI1:orf19.1761:LYS1:HIS3:HHT2:HHF22:orf19.1967:ARO2:CDC45:orf19.200:ATP18:RPL11:SPE3:RFA2:orf19.2275:WBP1:orf19.2306:RPL2:RPL29:RPS17B:RPL9B:MIS11:POL2:orf19.2382:SSU72:DPS1-1:orf19.2438:orf19.2478.1:orf19.2520:LYS12:orf19.2529:TRP2:MET6:CDC60:orf19.2650.1:CAM1-1:SES1:TYS1:RPC…	32:60261:6974:6261:71163:1178:45944:70602:84:30447:30491:7049:463:48478:6281:16126:48315:55085:43558:6567:6429:71361:7004:9272:6434:6227:9097:70791:722:42766:42254:71712:9052:8615:45461:30174:43066:71459:9113:45899:1900101:6546:46081:9085:2001165:6165:8295:6233:35955:2001209:6038:9082:76:31494:1901319:6564:44182:6334:917:727:31929:6273:71470:61392:42276:6351:15784:6366:30702:18065:30466:71441:622…
9058	biosynthetic process	263 out of 630 genes, 41.7%	1158 out of 5259 background genes, 22.0%	9.64e-30	0	HHF1:ACS2:orf19.1110:orf19.1137:orf19.1180:VRG4:HOM3:VAS1:orf19.1409.1:TEF1:APT1:RPS26A:STT3:orf19.1495:POB3:RPL3:RPL12:RAD50:RPS7A:RKI1:orf19.1761:LYS1:HIS3:HHT2:HHF22:orf19.1967:ARO2:CDC45:orf19.200:ATP18:RPL11:SPE3:RFA2:orf19.2275:WBP1:orf19.2306:RPL2:RPL29:RPS17B:RPL9B:MIS11:POL2:orf19.2382:SSU72:DPS1-1:orf19.2438:orf19.2478.1:orf19.2520:LYS12:orf19.2529:TRP2:MET6:CDC60:orf19.2650.1:CAM1-1:SE…	32:60261:6974:6261:32889:71163:1178:45944:70602:84:30447:30491:7049:463:48478:6281:16126:48315:55085:43558:6567:6429:71361:7004:9272:6434:6227:9097:70791:722:42766:42254:71712:9052:8615:45461:30174:43066:71459:9113:45899:1900101:6546:46081:9085:2001165:6165:8295:6233:35955:2001209:6038:9082:16226:76:6090:31494:1901319:6564:44182:6334:917:727:31929:6273:71470:61392:42276:6351:15784:6366:30702:1806…
9059	macromolecule biosynthetic process	173 out of 630 genes, 27.5%	702 out of 5259 background genes, 13.3%	5.1e-21	0	HHF1:VRG4:VAS1:orf19.1409.1:TEF1:RPS26A:STT3:POB3:RPL3:RPL12:RAD50:RPS7A:orf19.1761:HHT2:HHF22:orf19.1967:CDC45:orf19.200:RPL11:RFA2:orf19.2275:WBP1:RPL2:RPL29:RPS17B:RPL9B:POL2:orf19.2382:SSU72:DPS1-1:orf19.2438:orf19.2478.1:orf19.2520:orf19.2529:CDC60:orf19.2650.1:CAM1-1:SES1:TYS1:RPC31:RPL28:CBF1:CDC68:RPL10:TIF34:RPP1A:RPL13:RPS16A:RPS1:RPL6:orf19.3035:orf19.3061.1:UBI3:TMA19:DUT1:TIF:RPS21B:…	32:60261:6261:71163:1178:45944:70602:84:30447:30491:7049:463:48478:6281:48315:55085:43558:6429:7004:9272:6434:722:42766:42254:71712:30174:43066:71459:45899:1900101:46081:2001165:2001209:6038:76:31494:44182:6334:917:727:31929:6273:71470:42276:6351:15784:6366:30702:18065:30466:71441:45004:34599:32784:90329:6267:90529:35863:2000045:60303:2188:9263:479:34613:1015:9405:33314:9060:43935:723:2000220:635…
34645	cellular macromolecule biosynthetic process	172 out of 630 genes, 27.3%	697 out of 5259 background genes, 13.3%	6.18e-21	0	HHF1:VRG4:VAS1:orf19.1409.1:TEF1:RPS26A:STT3:POB3:RPL3:RPL12:RAD50:RPS7A:orf19.1761:HHT2:HHF22:orf19.1967:CDC45:orf19.200:RPL11:RFA2:orf19.2275:WBP1:RPL2:RPL29:RPS17B:RPL9B:POL2:orf19.2382:SSU72:DPS1-1:orf19.2438:orf19.2478.1:orf19.2520:orf19.2529:CDC60:orf19.2650.1:CAM1-1:SES1:TYS1:RPC31:RPL28:CBF1:CDC68:RPL10:TIF34:RPP1A:RPL13:RPS16A:RPS1:RPL6:orf19.3035:orf19.3061.1:UBI3:TMA19:DUT1:TIF:RPS21B:…	32:60261:6261:71163:1178:45944:70602:84:30447:30491:7049:463:48478:6281:48315:55085:43558:6429:7004:9272:6434:722:42766:42254:71712:30174:43066:71459:45899:1900101:46081:2001165:2001209:6038:76:31494:44182:6334:917:727:31929:6273:71470:42276:6351:15784:6366:30702:30466:71441:45004:34599:32784:90329:6267:90529:35863:2000045:60303:2188:9263:479:34613:1015:9405:33314:9060:43935:723:2000220:6353:6297…
44267	cellular protein metabolic process	204 out of 630 genes, 32.4%	988 out of 5259 background genes, 18.8%	2.18e-15	0	HHF1:ACS2:SSA2:DBF2:VRG4:orf19.1273:VAS1:TRA1:orf19.1409.1:TEF1:RPS26A:STT3:RPL3:RPL12:RPS7A:orf19.1761:HHF22:orf19.1967:KAR2:RPL11:RFA2:orf19.2275:WBP1:orf19.2299:RPL2:RPL29:RPS17B:CDC48:RPL9B:orf19.2382:SSU72:DPS1-1:MSI3:orf19.2438:orf19.2478.1:orf19.2520:MGE1:orf19.2529:SHP1:CDC60:orf19.2650.1:CAM1-1:SES1:TYS1:orf19.2828:RPL28:RPL10:TIF34:RPP1A:RPL13:RPS16A:RPS1:RPL6:orf19.3035:orf19.3061.1:UB…	32:6974:1178:45944:70602:921:30447:30491:7049:463:48478:6281:18293:48315:55085:43558:6429:7004:6434:1402:33047:6458:45292:722:6325:42766:42254:11:71712:492:208:18027:30950:6405:43066:51518:15031:742:1900101:7114:6546:16320:2001165:8361:6165:10731:31030:6121:226:71285:2001209:43248:6749:51084:80129:44182:6334:917:727:31929:320:6511:71470:7023:280:15784:1901673:10696:30702:42026:18065:30466:71441:1…
19538	protein metabolic process	205 out of 630 genes, 32.5%	1032 out of 5259 background genes, 19.6%	2.02e-13	0	HHF1:ACS2:SSA2:DBF2:VRG4:orf19.1273:VAS1:TRA1:orf19.1409.1:TEF1:RPS26A:STT3:RPL3:RPL12:RPS7A:orf19.1761:HHF22:orf19.1967:KAR2:RPL11:RFA2:orf19.2275:WBP1:orf19.2299:RPL2:RPL29:RPS17B:CDC48:RPL9B:orf19.2382:SSU72:DPS1-1:MSI3:orf19.2438:orf19.2478.1:orf19.2520:MGE1:orf19.2529:SHP1:CDC60:orf19.2650.1:CAM1-1:SES1:TYS1:orf19.2828:RPL28:RPL10:TIF34:RPP1A:RPL13:RPS16A:RPS1:RPL6:orf19.3035:orf19.3061.1:UB…	32:6974:1178:45944:70602:921:30447:30491:7049:463:48478:6281:18293:48315:55085:43558:6429:7004:6434:1402:33047:6458:45292:722:6325:42766:42254:11:71712:492:208:18027:30950:6405:43066:51518:15031:742:1900101:7114:6546:16320:2001165:8361:6165:10731:31030:6121:226:71285:2001209:43248:6749:51084:80129:44182:6334:917:727:31929:320:6511:71470:7023:280:15784:1901673:10696:30702:42026:18065:30466:71441:1…
6520	cellular amino acid metabolic process	66 out of 630 genes, 10.5%	220 out of 5259 background genes, 4.2%	2.97e-10	0	HOM3:VAS1:orf19.1495:LYS1:HIS3:ARO2:SPE3:orf19.2306:MIS11:orf19.2382:DPS1-1:LYS12:TRP2:MET6:CDC60:SES1:TYS1:CBF1:PDC11:MET13:HOM6:LYS2:CPA2:ARG8:LYS4:HIS1:HTS1:ARO4:GLR1:HIS5:THR4:orf19.4306:GRS1:LYS22:CPA1:ILV6:ARO1:ARG5,6:IDH1:GCV3:MET3:DFR1:IDP1:WRS1:SER33:MET4:ILV1:SER1:ARG3:THS1:ALA1:IDH2:LEU4:SAM2:ARG4:orf19.6701:DED81:MEU1:GUS1:LEU2:LYS9:ARG1:MIS12:ILV5:THR1:MET14	45944:6567:6429:6434:9097:70791:71459:9113:6546:9085:10731:8295:9082:6090:6749:6564:34599:96:6730:9405:43935:162:9073:6353:44416:9257:19878:103:6421:6537:9303:9088:42450:61427:6526:6110:9396:46685:46084:19655:32006:6422:6097:46452:9165:71276:71585:30436:6424:6357:9090:9116:6543:6427:6792:46654:45454:9070:6102:6338:6559:19379:6437:34605:90069:6555:1900189:46686:2:34508:7059:9249:32543:10811:6355:6…
44238	primary metabolic process	378 out of 630 genes, 60.0%	2444 out of 5259 background genes, 46.5%	4.18e-10	0	HTA2:orf19.1052:HHF1:HHT21:ACS2:SSA2:GUK1:orf19.1137:DBF2:VRG4:HOM3:TUB4:SEC23:orf19.1273:VAS1:orf19.1356:orf19.1389:TRA1:orf19.1409.1:TEF1:APT1:RPS26A:STT3:orf19.1495:POB3:RPL3:YCG1:RPL12:RAD50:RNA1:RPS7A:RKI1:orf19.1761:RAP1:LYS1:HIS3:HHT2:HHF22:orf19.1967:ARO2:CDC45:orf19.200:KAR2:ATP18:RPL11:SPE3:RFA2:orf19.2275:WBP1:orf19.2299:orf19.2306:RPL2:RPL29:RPS17B:CDC48:RPL9B:MIS11:POL2:orf19.2382:SS…	32:31848:6261:32889:1178:84:30447:6002:7049:463:31589:48478:55085:43558:6429:71361:7004:6227:48311:33047:6458:9097:722:6325:42766:42254:18027:45461:30174:43066:51518:9113:45899:742:1900101:7114:16320:51666:2001165:8361:1901919:31030:6121:6233:35955:226:71285:2001209:9082:76:6749:51084:80129:6564:19660:917:31929:71470:7023:34484:6351:42026:18065:30466:6228:45004:32784:46938:6267:10697:6302:34517:9…
8652	cellular amino acid biosynthetic process	47 out of 630 genes, 7.5%	129 out of 5259 background genes, 2.5%	4.45e-10	0	HOM3:orf19.1495:LYS1:HIS3:ARO2:SPE3:orf19.2306:MIS11:LYS12:TRP2:MET6:CBF1:MET13:HOM6:LYS2:CPA2:LYS4:HIS1:ARO4:HIS5:THR4:orf19.4306:LYS22:CPA1:ILV6:ARO1:ARG5,6:IDH1:MET3:DFR1:IDP1:SER33:ILV1:SER1:ARG3:IDH2:LEU4:SAM2:ARG4:MEU1:LEU2:LYS9:ARG1:MIS12:ILV5:THR1:MET14	9097:9113:9082:6564:9405:43935:44416:6537:9303:42450:61427:6526:6110:9396:46084:6097:9165:9116:6543:46654:19379:90069:6555:7059:44030:1900375:9092:6099:55114:6556:19509:61432:9086:70409:9098:6567:70791:71459:6546:9085:8295:6730:162:9073:9257:19878:103:9088:46452:71276:71585:30436:9090:6792:9070:6102:6338:34605:2:34508:6355:19344:1900478:46656:10045:909:6545:9099:105:35690:15940
1901607	alpha-amino acid biosynthetic process	40 out of 630 genes, 6.3%	104 out of 5259 background genes, 2.0%	3.75e-09	0	HOM3:orf19.1495:LYS1:HIS3:orf19.2306:MIS11:LYS12:TRP2:MET6:CBF1:MET13:HOM6:LYS2:CPA2:LYS4:HIS1:HIS5:THR4:orf19.4306:LYS22:CPA1:ARG5,6:IDH1:MET3:DFR1:IDP1:SER33:ILV1:SER1:ARG3:IDH2:LEU4:ARG4:MEU1:LEU2:LYS9:ARG1:MIS12:THR1:MET14	9097:9113:6564:9405:44416:6537:9303:42450:61427:6526:6110:9396:46084:6097:9165:9116:6543:46654:19379:90069:6555:7059:44030:1900375:9092:6099:55114:19509:61432:9086:70409:9098:6567:70791:71459:6546:9085:6730:162:9257:19878:103:9088:46452:71276:71585:30436:9090:6792:9070:6102:6338:34605:34508:6355:19344:1900478:46656:10045:6545:9099:105:35690
44237	cellular metabolic process	387 out of 630 genes, 61.4%	2550 out of 5259 background genes, 48.5%	3.89e-09	0	HTA2:orf19.1052:HHF1:HHT21:ACS2:SSA2:orf19.1110:GUK1:orf19.1137:DBF2:VRG4:HOM3:TUB4:PHO4:SEC23:orf19.1273:VAS1:orf19.1356:orf19.1389:TRA1:orf19.1409.1:TEF1:APT1:RPS26A:STT3:orf19.1495:POB3:RPL3:YCG1:RPL12:RAD50:RNA1:RPS7A:RKI1:orf19.1761:RAP1:LYS1:HIS3:HHT2:HHF22:LSC2:orf19.1967:ARO2:CDC45:orf19.200:KAR2:ATP18:RPL11:SPE3:RFA2:orf19.2275:WBP1:orf19.2299:orf19.2306:RPL2:RPL29:RPS17B:CDC48:RPL9B:MIS…	16237:32:31848:6261:32889:1178:84:30447:6002:7049:463:48478:55085:43558:6429:71361:7004:6227:48311:33047:6458:9097:722:6325:42766:42254:18027:45461:30174:43066:51518:9113:45899:742:1900101:7114:16320:51666:2001165:8361:1901919:31030:6121:6233:35955:226:71285:2001209:9082:76:6749:51084:80129:6564:19660:917:31929:71470:7023:34484:6351:42026:18065:30466:6228:45004:32784:46938:6267:10697:6302:34517:9…
71704	organic substance metabolic process	385 out of 630 genes, 61.1%	2537 out of 5259 background genes, 48.2%	5.13e-09	0	HTA2:orf19.1052:HHF1:HHT21:ACS2:SSA2:orf19.1110:GUK1:orf19.1137:DBF2:VRG4:HOM3:TUB4:SEC23:orf19.1273:VAS1:orf19.1356:orf19.1389:TRA1:orf19.1409.1:TEF1:APT1:RPS26A:STT3:orf19.1495:POB3:RPL3:YCG1:RPL12:RAD50:RNA1:RPS7A:RKI1:orf19.1761:RAP1:LYS1:HIS3:HHT2:HHF22:LSC2:orf19.1967:ARO2:CDC45:orf19.200:KAR2:ATP18:RPL11:SPE3:RFA2:orf19.2275:WBP1:orf19.2299:orf19.2306:RPL2:RPL29:RPS17B:CDC48:RPL9B:MIS11:PO…	16237:32:31848:6261:32889:1178:84:30447:6002:7049:463:31589:48478:55085:43558:6429:71361:7004:6227:48311:33047:6458:9097:722:6325:42766:42254:18027:45461:30174:43066:51518:9113:45899:742:1900101:7114:16320:51666:2001165:8361:1901919:31030:6121:6233:35955:226:71285:2001209:9082:76:6749:51084:80129:6564:19660:917:31929:71470:7023:34484:6351:42026:18065:30466:6228:45004:32784:46938:6267:10697:6302:3…
1901564	organonitrogen compound metabolic process	108 out of 630 genes, 17.1%	490 out of 5259 background genes, 9.3%	3.66e-08	0	orf19.1110:GUK1:orf19.1137:HOM3:TUB4:SEC23:VAS1:APT1:orf19.1495:RKI1:LYS1:HIS3:ARO2:ATP18:SPE3:orf19.2306:MIS11:orf19.2382:DPS1-1:LYS12:TRP2:MET6:CDC60:RSR1:SES1:TYS1:CBF1:PDC11:MET13:HOM6:LYS2:CPA2:ATP3:orf19.3259:DUT1:RHO3:ATP4:ATP20:ARG8:LYS4:orf19.3859:ADE13:PGI1:PSD2:HIS1:HTS1:ARO4:GLR1:HIS5:THR4:orf19.4306:YNK1:GRS1:TAL1:LYS22:CPA1:ILV6:ARO1:ARG5,6:IDH1:ADE12:MTS1:URA1:ADE17:SPC3:GCV3:AGM1:…	30447:6429:6227:48311:9097:9113:51666:6233:226:9082:6749:6564:6228:46938:90529:35863:6098:96:6679:90338:9405:71963:61508:43935:44416:6421:6537:46777:6260:9303:42450:61427:6526:6110:9396:46685:46084:42821:32006:6097:6106:9165:6424:6357:43936:9116:916:6543:51726:6913:6427:35786:46654:45454:6168:46037:6032:19379:6437:90069:6555:30010:1900189:46686:10590:7059:9249:32543:36151:6525:9267:44030:6419:218…
16053	organic acid biosynthetic process	52 out of 630 genes, 8.3%	170 out of 5259 background genes, 3.2%	5.7e-08	0	HOM3:orf19.1495:LYS1:HIS3:ARO2:SPE3:orf19.2306:MIS11:LYS12:TRP2:MET6:CBF1:MET13:HOM6:LYS2:CPA2:LYS4:orf19.3859:HIS1:ARO4:HIS5:THR4:orf19.4306:LYS22:CPA1:ILV6:ARO1:ARG5,6:orf19.4812:IDH1:FAD3:MET3:DFR1:IDP1:SER33:ILV1:SER1:ARG3:IDH2:LEU4:SAM2:ARG4:MEU1:LEU2:LYS9:ARG1:MIS12:orf19.819:ILV5:THR1:MET14:LKH1	9097:9113:9082:6564:18065:9405:43935:44416:6537:9303:42450:61427:6526:6110:9396:46084:6097:9165:9116:6543:19370:46654:19379:90069:6555:7059:44030:1900375:9092:6099:55114:6556:19509:9107:61432:9086:70409:9098:9059:6567:70791:71459:6546:9085:8295:30163:6730:6508:162:9073:9257:19878:103:9088:44255:30148:46452:71276:71585:30436:9090:6636:30497:6792:9070:6102:6338:34605:2:34508:6355:19344:1900478:4665…
46394	carboxylic acid biosynthetic process	52 out of 630 genes, 8.3%	170 out of 5259 background genes, 3.2%	5.7e-08	0	HOM3:orf19.1495:LYS1:HIS3:ARO2:SPE3:orf19.2306:MIS11:LYS12:TRP2:MET6:CBF1:MET13:HOM6:LYS2:CPA2:LYS4:orf19.3859:HIS1:ARO4:HIS5:THR4:orf19.4306:LYS22:CPA1:ILV6:ARO1:ARG5,6:orf19.4812:IDH1:FAD3:MET3:DFR1:IDP1:SER33:ILV1:SER1:ARG3:IDH2:LEU4:SAM2:ARG4:MEU1:LEU2:LYS9:ARG1:MIS12:orf19.819:ILV5:THR1:MET14:LKH1	9097:9113:9082:6564:18065:9405:43935:44416:6537:9303:42450:61427:6526:6110:9396:46084:6097:9165:9116:6543:19370:46654:19379:90069:6555:7059:44030:1900375:9092:6099:55114:6556:19509:9107:61432:9086:70409:9098:9059:6567:70791:71459:6546:9085:8295:30163:6730:6508:162:9073:9257:19878:103:9088:44255:30148:46452:71276:71585:30436:9090:6636:30497:6792:9070:6102:6338:34605:2:34508:6355:19344:1900478:4665…
1901566	organonitrogen compound biosynthetic process	74 out of 630 genes, 11.7%	289 out of 5259 background genes, 5.5%	5.84e-08	0	orf19.1110:orf19.1137:HOM3:APT1:orf19.1495:RKI1:LYS1:HIS3:ARO2:ATP18:SPE3:orf19.2306:MIS11:LYS12:TRP2:MET6:CBF1:MET13:HOM6:LYS2:CPA2:ATP3:ATP4:ATP20:LYS4:orf19.3859:ADE13:PSD2:HIS1:ARO4:HIS5:THR4:orf19.4306:YNK1:LYS22:CPA1:ILV6:ARO1:ARG5,6:IDH1:ADE12:MTS1:URA1:ADE17:AGM1:MET3:DFR1:CHS1:IDP1:ATP19:SER33:ATP5:ILV1:SER1:ATP14:orf19.5597.1:ARG3:ATP2:orf19.5660.1:IDH2:LEU4:SAM2:ARG4:MEU1:LEU2:orf19.73…	30447:6227:9097:9113:6233:9082:6564:6228:46938:90529:6098:6679:9405:61508:43935:44416:6537:46777:9303:42450:61427:6526:6110:9396:46084:42821:6097:6106:9165:43936:9116:916:6543:35786:46654:6168:19379:90069:6555:7059:44030:36170:1900375:9092:30448:6235:6099:15986:6045:6207:55114:6556:19509:6656:34221:31505:44209:42776:61432:9229:9086:70409:9098:6189:6974:48315:6567:70791:9052:8615:71459:6546:9085:6…
1901605	alpha-amino acid metabolic process	44 out of 630 genes, 7.0%	132 out of 5259 background genes, 2.5%	8.49e-08	0	HOM3:orf19.1495:LYS1:HIS3:orf19.2306:MIS11:LYS12:TRP2:MET6:CBF1:PDC11:MET13:HOM6:LYS2:CPA2:ARG8:LYS4:HIS1:HIS5:THR4:orf19.4306:LYS22:CPA1:ARG5,6:IDH1:GCV3:MET3:DFR1:IDP1:SER33:ILV1:SER1:ARG3:IDH2:LEU4:SAM2:ARG4:MEU1:LEU2:LYS9:ARG1:MIS12:THR1:MET14	9097:9113:6564:9405:43935:44416:6537:9303:42450:61427:6526:6110:9396:46084:6097:9165:9116:6543:46654:19379:90069:6555:7059:9249:6525:44030:6569:1900375:9092:6099:55114:6556:19509:19464:61432:9086:70409:9098:6567:70791:71459:6546:9085:6090:6730:162:9257:19878:103:9088:19655:46452:71276:71585:30436:9090:6792:9070:6102:6338:6559:34605:34508:6355:19344:1900478:46656:949:10045:909:6545:9099:105:35690
9987	cellular process	514 out of 630 genes, 81.6%	3738 out of 5259 background genes, 71.1%	1.27e-07	0	orf19.1012:MAD2:HTA2:orf19.1052:CDC3:HHF1:HHT21:ACS2:SSA2:orf19.1110:GUK1:orf19.1137:DBF2:VRG4:HOM3:TUB4:PHO4:SEC23:orf19.1273:VAS1:RBT1:orf19.1356:orf19.1389:TRA1:orf19.1409.1:DUO1:TEF1:APT1:RPS26A:STT3:orf19.1495:TIM17:AMN1:POB3:ZRT2:RPL3:YCG1:RPL12:RAD50:RNA1:TOM6:orf19.1672:BZZ1:RPS7A:RKI1:ARF3:orf19.1761:RAP1:LYS1:HIS3:MDM10:HHT2:HHF22:LSC2:NUF2:orf19.1967:ARO2:CDC45:orf19.200:KAR2:HGT7:ATP1…	2000601:16237:32:60565:31848:6261:32889:45324:1178:84:30447:6002:2000689:7049:463:6843:31589:48478:55085:43558:6429:71361:7004:6227:33047:48311:6458:9097:16239:722:6325:42766:42254:15691:18027:45461:30174:43066:51518:9113:45899:742:1900101:7114:34090:16320:45048:51666:2001165:8361:1901919:31030:6121:6233:44774:35955:226:71285:10674:2001209:9082:76:32220:6749:51084:80129:7019:1900239:6564:19660:91…
10467	gene expression	162 out of 630 genes, 25.7%	860 out of 5259 background genes, 16.4%	1.41e-07	0	HHF1:VAS1:orf19.1356:orf19.1409.1:TEF1:RPS26A:RPL3:RPL12:RPS7A:HHT2:HHF22:orf19.1967:orf19.200:RPL11:orf19.2275:orf19.2299:RPL2:RPL29:RPS17B:RPL9B:orf19.2382:SSU72:DPS1-1:orf19.2438:orf19.2478.1:orf19.2520:CDC60:orf19.2650.1:CAM1-1:SES1:TYS1:RPC31:RPL28:CBF1:CDC68:RPL10:TIF34:RPP1A:RPL13:RPS16A:TSR2:RPS1:RPL6:orf19.3035:orf19.3061.1:UBI3:NOP1:orf19.3259:TMA19:TIF:RPS21B:RPS21:orf19.3367:RPL32:RPL…	6261:1178:30447:463:43558:6429:6458:42766:42254:43066:45899:7114:2001165:2001209:31929:71470:6351:42026:30466:32784:60303:2188:1015:9405:2143:9060:43935:723:6631:447:6421:6303:9303:61427:6110:6369:2000805:32006:34729:31126:6424:43044:43618:43936:51726:51701:6352:6913:27:6427:42797:6306:6437:90069:17148:30847:7059:16567:32543:70898:90262:9267:44030:6419:2181:33108:16584:6407:36170:1900375:6435:646…
19752	carboxylic acid metabolic process	77 out of 630 genes, 12.2%	322 out of 5259 background genes, 6.1%	7.96e-07	0	ACS2:HOM3:VAS1:orf19.1495:LYS1:HIS3:ARO2:SPE3:orf19.2306:MIS11:orf19.2382:DPS1-1:LYS12:TRP2:MET6:CDC60:SES1:TYS1:CBF1:PDC11:MET13:HOM6:LYS2:CPA2:CDC19:ARG8:LYS4:orf19.3859:ADE13:HIS1:HTS1:ARO4:GLR1:HIS5:THR4:orf19.4306:GRS1:LYS22:orf19.4520:CPA1:ILV6:ARO1:ARG5,6:orf19.4812:IDH1:ADE12:FAD3:GCV3:MET3:DFR1:IDP1:WRS1:SER33:MET4:orf19.5420:ILV1:SER1:ARG3:THS1:ALA1:IDH2:LEU4:SAM2:ARG4:orf19.6701:DED81:…	30447:6429:9097:9113:9082:6749:6564:18065:46938:96:9405:43935:6631:44416:6421:6537:9303:42450:70317:61427:6526:6110:9396:46685:46084:32006:6097:6106:9165:6424:6357:9116:6543:19370:6427:46654:45454:19379:6437:90069:6555:15976:1900189:46686:7059:9249:32543:6525:9267:44030:6419:2181:36170:6569:1900375:6435:9092:6099:36245:55114:6556:19509:9107:70150:19464:6083:61432:6436:9086:1302:70409:9098:6189:90…
51029	rRNA transport	11 out of 630 genes, 1.7%	12 out of 5259 background genes, 0.2%	1.1e-06	0	RPS26A:RNA1:RPS10:RPS21:RPS5:RPS15:RPS19A:RPS3:YST1:RPS18:RPS28B	447:6348:2181:51383:6606:6407:469:28:461:6399:46827:30702:45903:42274:30490:6412:6404:56:54:70:16072
6407	rRNA export from nucleus	11 out of 630 genes, 1.7%	12 out of 5259 background genes, 0.2%	1.1e-06	0	RPS26A:RNA1:RPS10:RPS21:RPS5:RPS15:RPS19A:RPS3:YST1:RPS18:RPS28B	447:6348:2181:51383:6606:6407:469:28:461:6399:46827:30702:45903:42274:30490:6412:6404:56:54:70:16072
8152	metabolic process	406 out of 630 genes, 64.4%	2798 out of 5259 background genes, 53.2%	1.24e-06	0	HTA2:orf19.1052:HHF1:HHT21:ACS2:SSA2:orf19.1110:GUK1:orf19.1137:orf19.1180:DBF2:VRG4:HOM3:TUB4:PHO4:SEC23:orf19.1273:VAS1:orf19.1356:orf19.1389:TRA1:orf19.1409.1:FRE10:TEF1:APT1:RPS26A:STT3:orf19.1495:POB3:RPL3:YCG1:RPL12:RAD50:RNA1:RPS7A:RKI1:orf19.1761:RAP1:LYS1:HIS3:HHT2:HHF22:LSC2:orf19.1967:ARO2:CDC45:orf19.200:KAR2:ATP18:RPL11:SPE3:RFA2:orf19.2269:orf19.2275:WBP1:orf19.2299:orf19.2306:RPL2:…	16237:32:31848:6261:32889:1178:84:30447:6002:7049:463:31589:48478:55085:43558:6429:71361:7004:6227:48311:33047:6458:9097:722:6325:42766:42254:18027:45461:30174:43066:51518:9113:45899:742:1900101:7114:16320:51666:2001165:8361:1901919:31030:6121:6233:35955:226:71285:2001209:9082:76:6749:51084:80129:6564:19660:917:31929:71470:7023:34484:6351:42026:18065:30466:6228:45004:32784:46938:6267:10697:6302:3…
43436	oxoacid metabolic process	78 out of 630 genes, 12.4%	332 out of 5259 background genes, 6.3%	1.48e-06	0	ACS2:HOM3:VAS1:orf19.1495:LYS1:HIS3:ARO2:SPE3:orf19.2306:MIS11:orf19.2382:DPS1-1:LYS12:TRP2:MET6:CDC60:SES1:TYS1:CBF1:PDC11:MET13:HOM6:LYS2:CPA2:CDC19:ARG8:LYS4:orf19.3859:ADE13:HIS1:HTS1:ARO4:GLR1:HIS5:THR4:orf19.4306:GRS1:LYS22:orf19.4520:CPA1:ILV6:ARO1:ARG5,6:orf19.4812:IDH1:ADE12:FAD3:GCV3:MET3:DFR1:IDP1:WRS1:SER33:MET4:orf19.5420:orf19.5455:ILV1:SER1:ARG3:THS1:ALA1:IDH2:LEU4:SAM2:ARG4:orf19.…	16237:30447:6429:9097:9113:9082:6749:6564:18065:46938:96:9405:43935:6631:2000769:44416:6421:6537:9303:42450:70317:61427:6526:6110:9396:46685:46084:32006:6097:6797:6106:9165:6424:6357:9116:6543:19370:6427:46654:45454:19379:6437:90069:6555:15976:1900189:46686:7059:9249:32543:6525:9267:44030:6419:2181:36170:6569:1900375:6435:9092:6099:36245:55114:6556:19509:9107:70150:19464:6083:61432:6436:9086:1302…
6082	organic acid metabolic process	78 out of 630 genes, 12.4%	333 out of 5259 background genes, 6.3%	1.72e-06	0	ACS2:HOM3:VAS1:orf19.1495:LYS1:HIS3:ARO2:SPE3:orf19.2306:MIS11:orf19.2382:DPS1-1:LYS12:TRP2:MET6:CDC60:SES1:TYS1:CBF1:PDC11:MET13:HOM6:LYS2:CPA2:CDC19:ARG8:LYS4:orf19.3859:ADE13:HIS1:HTS1:ARO4:GLR1:HIS5:THR4:orf19.4306:GRS1:LYS22:orf19.4520:CPA1:ILV6:ARO1:ARG5,6:orf19.4812:IDH1:ADE12:FAD3:GCV3:MET3:DFR1:IDP1:WRS1:SER33:MET4:orf19.5420:orf19.5455:ILV1:SER1:ARG3:THS1:ALA1:IDH2:LEU4:SAM2:ARG4:orf19.…	16237:30447:6429:9097:9113:9082:6749:6564:18065:46938:96:9405:43935:6631:2000769:44416:6421:6537:9303:42450:70317:61427:6526:6110:9396:46685:46084:32006:6097:6797:6106:9165:6424:6357:9116:6543:19370:6427:46654:45454:19379:6437:90069:6555:15976:1900189:46686:7059:9249:32543:6525:9267:44030:6419:2181:36170:6569:1900375:6435:9092:6099:36245:55114:6556:19509:9107:70150:19464:6083:61432:6436:9086:1302…
9066	aspartate family amino acid metabolic process	21 out of 630 genes, 3.3%	42 out of 5259 background genes, 0.8%	2.29e-06	0	HOM3:orf19.1495:LYS1:orf19.2306:LYS12:MET6:CBF1:MET13:HOM6:LYS2:LYS4:THR4:orf19.4306:LYS22:MET3:ILV1:SAM2:MEU1:LYS9:THR1:MET14	9097:43935:44416:6537:9303:61427:6110:46084:9116:19379:90069:6555:7059:44030:1900375:9092:55114:6556:19509:61432:9086:6567:71459:9085:6730:19878:103:9088:71276:71585:9090:6792:6338:34605:34508:6355:19344:1900478:909:9099
9067	aspartate family amino acid biosynthetic process	19 out of 630 genes, 3.0%	36 out of 5259 background genes, 0.7%	4.33e-06	0	HOM3:orf19.1495:LYS1:orf19.2306:LYS12:MET6:CBF1:MET13:HOM6:LYS2:LYS4:THR4:orf19.4306:LYS22:MET3:MEU1:LYS9:THR1:MET14	44416:6537:9303:61427:6110:46084:9116:19379:90069:6555:7059:44030:1900375:9092:55114:19509:61432:9086:71459:9085:6730:19878:103:9088:71276:71585:9090:6792:6338:34605:34508:6355:19344:1900478
2181	cytoplasmic translation	19 out of 630 genes, 3.0%	37 out of 5259 background genes, 0.7%	7.93e-06	0	orf19.1409.1:RPL2:RPL29:RPL9B:orf19.2478.1:TIF34:RPL6:TMA19:orf19.3572.3:orf19.3690.2:RPL17B:RPL15A:THS1:RPG1A:orf19.6599.1:orf19.6882.1:YST1:HCR1:RPL39	30447:71470:2188:447:27:9267:2181:6407:36170:6435:462:28:461:70321:34599:6450:6412:6413:71216:36180:35690
44281	small molecule metabolic process	119 out of 630 genes, 18.9%	607 out of 5259 background genes, 11.5%	8.11e-06	0	ACS2:GUK1:orf19.1137:HOM3:TUB4:SEC23:VAS1:APT1:orf19.1495:RKI1:LYS1:HIS3:ARO2:ATP18:SPE3:orf19.2306:MIS11:orf19.2382:DPS1-1:LYS12:TRP2:MET6:CDC60:RSR1:SES1:TYS1:CBF1:PDC11:MET13:HOM6:LYS2:CPA2:ATP3:DUT1:RHO3:CDC19:ATP4:ERG9:ATP20:ARG8:LYS4:orf19.3859:ADE13:PGI1:SAH1:PSD2:HIS1:HTS1:ARO4:GLR1:HIS5:THR4:orf19.4306:YNK1:GRS1:TAL1:ERG20:LYS22:orf19.4520:CPA1:ILV6:ARO1:ARG5,6:orf19.4812:IDH1:ADE12:URA1…	16237:30447:55085:6429:6227:48311:9097:9113:51666:6233:226:9082:6749:6564:34484:18065:6228:46938:35863:6098:96:9263:90338:9405:71963:9060:61508:43935:6631:2000769:44416:6421:6537:46777:6260:9303:42450:70317:61427:6526:6110:9396:46685:46084:42821:32006:6097:6797:6106:9165:6424:6357:71456:6021:9116:6543:51726:19370:6913:45337:6427:35786:9061:46654:45454:6168:46037:19379:6437:90069:6555:30010:15976:…
44711	single-organism biosynthetic process	64 out of 630 genes, 10.2%	262 out of 5259 background genes, 5.0%	1.08e-05	0	HOM3:orf19.1495:RKI1:LYS1:HIS3:ARO2:SPE3:orf19.2306:MIS11:LYS12:TRP2:MET6:CBF1:PDC11:MET13:HOM6:LYS2:CPA2:ERG9:LYS4:orf19.3859:PSD2:HIS1:ARO4:HIS5:THR4:orf19.4306:ERG20:LYS22:CPA1:ILV6:ARO1:ARG5,6:orf19.4812:IDH1:ADE12:FAD3:MET3:DFR1:IDP1:SER33:ILV1:SER1:ARG3:IDH2:LEU4:MVD:TUP1:SAM2:orf19.6662:ARG4:MEU1:LEU2:orf19.7306:OPI3:LYS9:ARG1:MIS12:INO1:orf19.819:ILV5:THR1:MET14:LKH1	30447:9097:45461:9113:35955:9082:6564:18065:46938:6098:16337:9405:43935:44416:6537:9303:42450:45827:70317:61427:6526:43486:6110:9396:46084:42821:6097:70873:6106:9165:6021:9116:6543:19370:10914:45337:46654:71280:2001020:19379:90069:6555:45892:7059:44409:9267:44030:43156:6342:16584:36170:6569:1900375:9092:30448:6099:55114:6744:6556:8299:19509:9107:51834:6656:1198:1900429:61432:9086:70409:9098:7070:…
44283	small molecule biosynthetic process	62 out of 630 genes, 9.8%	253 out of 5259 background genes, 4.8%	1.66e-05	0	HOM3:orf19.1495:RKI1:LYS1:HIS3:ARO2:SPE3:orf19.2306:MIS11:LYS12:TRP2:MET6:CBF1:PDC11:MET13:HOM6:LYS2:CPA2:ERG9:LYS4:orf19.3859:PSD2:HIS1:ARO4:HIS5:THR4:orf19.4306:ERG20:LYS22:CPA1:ILV6:ARO1:ARG5,6:orf19.4812:IDH1:FAD3:MET3:DFR1:IDP1:SER33:ILV1:SER1:ARG3:IDH2:LEU4:MVD:SAM2:orf19.6662:ARG4:MEU1:LEU2:orf19.7306:OPI3:LYS9:ARG1:MIS12:INO1:orf19.819:ILV5:THR1:MET14:LKH1	9097:9113:9082:6564:18065:6098:9405:43935:44416:6537:9303:42450:70317:61427:6526:6110:9396:46084:42821:6097:9165:6021:9116:6543:19370:45337:46654:19379:90069:6555:7059:44030:36170:6569:1900375:9092:6099:55114:6744:6556:8299:19509:9107:6656:61432:9086:70409:9098:9059:16126:6567:70791:9052:8615:71459:6546:9085:8295:6090:30163:6730:6508:162:9073:9257:19878:103:9088:44255:45333:30148:19655:46452:7127…
15985	energy coupled proton transport, down electrochemical gradient	11 out of 630 genes, 1.7%	14 out of 5259 background genes, 0.3%	2.65e-05	0	ATP18:ATP3:ATP4:ATP20:ATP19:ATP5:ATP14:orf19.5597.1:ATP2:orf19.5660.1:ATP16	35786:15986:42776:42407:15991:33615
15986	ATP synthesis coupled proton transport	11 out of 630 genes, 1.7%	14 out of 5259 background genes, 0.3%	2.65e-05	0	ATP18:ATP3:ATP4:ATP20:ATP19:ATP5:ATP14:orf19.5597.1:ATP2:orf19.5660.1:ATP16	35786:15986:42776:42407:15991:33615
9145	purine nucleoside triphosphate biosynthetic process	12 out of 630 genes, 1.9%	17 out of 5259 background genes, 0.3%	4.22e-05	0	ATP18:ATP3:ATP4:ATP20:YNK1:ATP19:ATP5:ATP14:orf19.5597.1:ATP2:orf19.5660.1:ATP16	6228:61508:46777:35786:30448:15986:42776:6974:6165:6979:6183:6241:42407:51211:15991:33615
9206	purine ribonucleoside triphosphate biosynthetic process	12 out of 630 genes, 1.9%	17 out of 5259 background genes, 0.3%	4.22e-05	0	ATP18:ATP3:ATP4:ATP20:YNK1:ATP19:ATP5:ATP14:orf19.5597.1:ATP2:orf19.5660.1:ATP16	6228:61508:46777:35786:30448:15986:42776:6974:6165:6979:6183:6241:42407:51211:15991:33615
9142	nucleoside triphosphate biosynthetic process	13 out of 630 genes, 2.1%	20 out of 5259 background genes, 0.4%	4.93e-05	0	orf19.1137:ATP18:ATP3:ATP4:ATP20:YNK1:ATP19:ATP5:ATP14:orf19.5597.1:ATP2:orf19.5660.1:ATP16	6227:6233:6228:61508:46777:35786:30448:6235:15986:42776:6974:6165:6979:6183:6241:42407:51211:15991:33615
9201	ribonucleoside triphosphate biosynthetic process	12 out of 630 genes, 1.9%	18 out of 5259 background genes, 0.3%	0.00011	0	ATP18:ATP3:ATP4:ATP20:YNK1:ATP19:ATP5:ATP14:orf19.5597.1:ATP2:orf19.5660.1:ATP16	6228:61508:46777:35786:30448:15986:42776:6974:6165:6979:6183:6241:42407:51211:15991:33615
6754	ATP biosynthetic process	11 out of 630 genes, 1.7%	16 out of 5259 background genes, 0.3%	0.00025	0	ATP18:ATP3:ATP4:ATP20:ATP19:ATP5:ATP14:orf19.5597.1:ATP2:orf19.5660.1:ATP16	35786:15986:42776:42407:15991:33615
42451	purine nucleoside biosynthetic process	16 out of 630 genes, 2.5%	33 out of 5259 background genes, 0.6%	0.00037	0	APT1:ATP18:ATP3:ATP4:ATP20:ADE13:YNK1:ADE12:ATP19:ATP5:ATP14:orf19.5597.1:ATP2:orf19.5660.1:SAM2:ATP16	6228:46938:61508:43935:46777:46084:6106:35786:6168:6555:30448:15986:6556:44209:42776:6189:6974:6165:44208:6979:6183:71276:71585:70814:6241:42407:51211:15991:909:33615
46129	purine ribonucleoside biosynthetic process	16 out of 630 genes, 2.5%	33 out of 5259 background genes, 0.6%	0.00037	0	APT1:ATP18:ATP3:ATP4:ATP20:ADE13:YNK1:ADE12:ATP19:ATP5:ATP14:orf19.5597.1:ATP2:orf19.5660.1:SAM2:ATP16	6228:46938:61508:43935:46777:46084:6106:35786:6168:6555:30448:15986:6556:44209:42776:6189:6974:6165:44208:6979:6183:71276:71585:70814:6241:42407:51211:15991:909:33615
42455	ribonucleoside biosynthetic process	17 out of 630 genes, 2.7%	37 out of 5259 background genes, 0.7%	0.00041	0	APT1:ATP18:ATP3:ATP4:ATP20:ADE13:YNK1:ADE12:URA1:ATP19:ATP5:ATP14:orf19.5597.1:ATP2:orf19.5660.1:SAM2:ATP16	6228:46938:61508:43935:46777:46084:6106:35786:6168:6555:30448:15986:6207:55114:6556:44209:42776:6189:6974:6165:44208:6979:6183:71276:71585:70814:6222:6241:42407:51211:15991:909:33615
9163	nucleoside biosynthetic process	17 out of 630 genes, 2.7%	37 out of 5259 background genes, 0.7%	0.00041	0	APT1:ATP18:ATP3:ATP4:ATP20:ADE13:YNK1:ADE12:URA1:ATP19:ATP5:ATP14:orf19.5597.1:ATP2:orf19.5660.1:SAM2:ATP16	6228:46938:61508:43935:46777:46084:6106:35786:6168:6555:30448:15986:6207:55114:6556:44209:42776:6189:6974:6165:44208:6979:6183:71276:71585:70814:6222:6241:42407:51211:15991:909:33615
72522	purine-containing compound biosynthetic process	20 out of 630 genes, 3.2%	50 out of 5259 background genes, 1.0%	0.0006	0	APT1:ATP18:MIS11:MET6:ATP3:ATP4:ATP20:ADE13:YNK1:ADE12:ADE17:ATP19:ATP5:SER1:ATP14:orf19.5597.1:ATP2:orf19.5660.1:SAM2:ATP16	9113:6564:6228:46938:61508:43935:44416:46777:46084:6106:35786:6168:6555:44030:30448:15986:55114:6556:44209:42776:9086:6189:6974:6546:6165:6730:44208:9257:6979:6183:71276:71585:70814:6241:34605:42407:46656:51211:15991:909:33615
9156	ribonucleoside monophosphate biosynthetic process	16 out of 630 genes, 2.5%	35 out of 5259 background genes, 0.7%	0.00102	0	APT1:ATP18:ATP3:ATP4:ATP20:ADE13:ADE12:URA1:ADE17:ATP19:ATP5:ATP14:orf19.5597.1:ATP2:orf19.5660.1:ATP16	46938:46084:6106:35786:6168:15986:6207:55114:44209:42776:6189:44208:71276:71585:70814:6222:42407:15991:33615
44260	cellular macromolecule metabolic process	271 out of 630 genes, 43.0%	1806 out of 5259 background genes, 34.3%	0.00135	0	HTA2:orf19.1052:HHF1:HHT21:ACS2:SSA2:DBF2:VRG4:orf19.1273:VAS1:orf19.1356:orf19.1389:TRA1:orf19.1409.1:TEF1:RPS26A:STT3:POB3:RPL3:YCG1:RPL12:RAD50:RNA1:RPS7A:orf19.1761:RAP1:HHT2:HHF22:orf19.1967:CDC45:orf19.200:KAR2:RPL11:RFA2:orf19.2275:WBP1:orf19.2299:RPL2:RPL29:RPS17B:CDC48:RPL9B:POL2:orf19.2382:SSU72:DPS1-1:MSI3:orf19.2438:orf19.2478.1:orf19.2520:MGE1:orf19.2529:SHP1:CDC60:SMC3:orf19.2650.1:…	32:31848:6261:1178:84:30447:7049:463:48478:55085:43558:6429:7004:33047:6458:722:6325:42766:42254:18027:45461:30174:43066:51518:45899:742:1900101:7114:16320:2001165:8361:1901919:31030:6121:226:35955:71285:2001209:76:6749:51084:80129:917:31929:71470:7023:6351:42026:18065:30466:6228:45004:32784:6267:10697:6302:34517:90529:30100:35863:60303:6616:2188:9263:36177:1015:16337:9405:30518:33314:71963:51083…
9127	purine nucleoside monophosphate biosynthetic process	15 out of 630 genes, 2.4%	32 out of 5259 background genes, 0.6%	0.00155	0	APT1:ATP18:ATP3:ATP4:ATP20:ADE13:ADE12:ADE17:ATP19:ATP5:ATP14:orf19.5597.1:ATP2:orf19.5660.1:ATP16	46938:46084:6106:35786:6168:15986:44209:42776:6189:44208:71276:71585:70814:42407:15991:33615
9168	purine ribonucleoside monophosphate biosynthetic process	15 out of 630 genes, 2.4%	32 out of 5259 background genes, 0.6%	0.00155	0	APT1:ATP18:ATP3:ATP4:ATP20:ADE13:ADE12:ADE17:ATP19:ATP5:ATP14:orf19.5597.1:ATP2:orf19.5660.1:ATP16	46938:46084:6106:35786:6168:15986:44209:42776:6189:44208:71276:71585:70814:42407:15991:33615
9161	ribonucleoside monophosphate metabolic process	17 out of 630 genes, 2.7%	40 out of 5259 background genes, 0.8%	0.00164	0	GUK1:APT1:ATP18:ATP3:ATP4:ATP20:ADE13:ADE12:URA1:ADE17:ATP19:ATP5:ATP14:orf19.5597.1:ATP2:orf19.5660.1:ATP16	46938:46084:6106:35786:6168:46037:15986:6207:55114:44209:42776:6189:44208:71276:71585:70814:6222:42407:15991:33615
280	nuclear division	31 out of 630 genes, 4.9%	106 out of 5259 background genes, 2.0%	0.00173	0	MAD2:DBF2:TUB4:POB3:YCG1:RNA1:orf19.1672:NUF2:CDC48:POL2:SHP1:SMC3:orf19.3035:orf19.3459:SGO1:SEP7:DAD3:CDC14:SMC1:POL30:KIN3:ARP4:DYN1:CDC5:CSE4:GIN1:orf19.6789:orf19.6843:IRR1:TUB1:MCD1	60565:6261:1178:30447:48478:48311:33047:42766:45899:34090:16320:31030:44774:76:7019:917:30466:45004:6302:34517:60303:9405:33314:71963:31110:723:61166:2000220:6297:30970:6348:35853:51177:6303:70058:34080:45:30437:43486:70550:32880:31031:6369:40023:1902002:10212:43044:6357:7064:1900182:1990116:7052:6284:43987:31565:34087:10032:9847:6301:30473:1900461:10964:7076:710:9267:7130:51383:51304:31573:10458…
71822	protein complex subunit organization	75 out of 630 genes, 11.9%	370 out of 5259 background genes, 7.0%	0.00225	0	HTA2:orf19.1052:CDC3:HHF1:HHT21:DBF2:TUB4:orf19.1273:DUO1:POB3:RNA1:TOM6:BZZ1:MDM10:HHT2:HHF22:ATP18:CDC48:MLC1:USO1:orf19.2650.1:CDC68:RPL10:CDC12:orf19.3035:orf19.3122.2:HTA3:PRE9:ERF1:SGO1:DAD2:ATP4:SEP7:orf19.3686:ASF1:ATP20:DAD3:ARC40:orf19.3994:CEF3:orf19.4230:orf19.4437:NHP6A:SEC24:HCM1:orf19.4952.1:ACT1:DAD1:ATP19:KIN3:orf19.5433:ATP14:MIF2:ARP4:orf19.5660.1:DYN1:CDC5:TUP1:CSE4:TPM2:HSP90…	2000601:6261:1178:30447:2000689:33047:48311:6458:42766:45461:45899:34090:16320:51666:8361:31030:35955:32220:80129:7019:917:51260:71470:34551:42026:30466:32784:34517:30100:60303:9651:16337:9405:30518:71963:31110:43935:723:34316:61166:2000220:6337:70584:35066:30970:6348:46777:7021:6303:9303:45827:48280:30150:34080:43486:6457:1:33955:32880:31031:6369:2000805:34729:70873:40023:22:43044:6357:43618:439…
1901659	glycosyl compound biosynthetic process	17 out of 630 genes, 2.7%	41 out of 5259 background genes, 0.8%	0.00249	0	APT1:ATP18:ATP3:ATP4:ATP20:ADE13:YNK1:ADE12:URA1:ATP19:ATP5:ATP14:orf19.5597.1:ATP2:orf19.5660.1:SAM2:ATP16	6228:46938:61508:43935:46777:46084:6106:35786:6168:6555:30448:15986:6207:55114:6556:44209:42776:6189:6974:6165:44208:6979:6183:71276:71585:70814:6222:6241:42407:51211:15991:909:33615
48285	organelle fission	32 out of 630 genes, 5.1%	113 out of 5259 background genes, 2.1%	0.00255	0	MAD2:DBF2:TUB4:POB3:YCG1:RNA1:orf19.1672:NUF2:CDC48:POL2:SHP1:SMC3:orf19.3035:orf19.3459:SGO1:SEP7:DAD3:CDC14:SMC1:POL30:KIN3:ARP4:DYN1:CDC5:CSE4:GIN1:orf19.6789:orf19.6843:DNM1:IRR1:TUB1:MCD1	60565:6261:1178:30447:48478:48311:33047:42766:45899:34090:16320:31030:44774:76:7019:917:51260:30466:45004:6302:34517:60303:9405:33314:71963:31110:723:61166:2000220:6297:30970:6348:35853:51177:6303:70058:34080:45:30437:43486:70550:1:33955:32880:31031:6369:40023:1902002:10212:43044:6357:7064:1900182:1990116:7052:6284:43987:31565:34087:10032:9847:6301:30473:1900461:10964:7076:710:9267:7130:51383:513…
9124	nucleoside monophosphate biosynthetic process	16 out of 630 genes, 2.5%	37 out of 5259 background genes, 0.7%	0.00258	0	APT1:ATP18:ATP3:ATP4:ATP20:ADE13:ADE12:URA1:ADE17:ATP19:ATP5:ATP14:orf19.5597.1:ATP2:orf19.5660.1:ATP16	46938:46084:6106:35786:6168:15986:6207:55114:44209:42776:6189:44208:71276:71585:70814:6222:42407:15991:33615
9126	purine nucleoside monophosphate metabolic process	16 out of 630 genes, 2.5%	37 out of 5259 background genes, 0.7%	0.00258	0	GUK1:APT1:ATP18:ATP3:ATP4:ATP20:ADE13:ADE12:ADE17:ATP19:ATP5:ATP14:orf19.5597.1:ATP2:orf19.5660.1:ATP16	46938:46084:6106:35786:6168:46037:15986:44209:42776:6189:44208:71276:71585:70814:42407:15991:33615
9167	purine ribonucleoside monophosphate metabolic process	16 out of 630 genes, 2.5%	37 out of 5259 background genes, 0.7%	0.00258	0	GUK1:APT1:ATP18:ATP3:ATP4:ATP20:ADE13:ADE12:ADE17:ATP19:ATP5:ATP14:orf19.5597.1:ATP2:orf19.5660.1:ATP16	46938:46084:6106:35786:6168:46037:15986:44209:42776:6189:44208:71276:71585:70814:42407:15991:33615
9123	nucleoside monophosphate metabolic process	17 out of 630 genes, 2.7%	42 out of 5259 background genes, 0.8%	0.00373	0	GUK1:APT1:ATP18:ATP3:ATP4:ATP20:ADE13:ADE12:URA1:ADE17:ATP19:ATP5:ATP14:orf19.5597.1:ATP2:orf19.5660.1:ATP16	46938:46084:6106:35786:6168:46037:15986:6207:55114:44209:42776:6189:44208:71276:71585:70814:6222:42407:15991:33615
9260	ribonucleotide biosynthetic process	17 out of 630 genes, 2.7%	42 out of 5259 background genes, 0.8%	0.00373	0	APT1:ATP18:ATP3:ATP4:ATP20:ADE13:YNK1:ADE12:URA1:ADE17:ATP19:ATP5:ATP14:orf19.5597.1:ATP2:orf19.5660.1:ATP16	6228:46938:61508:46777:46084:6106:35786:6168:30448:15986:6207:55114:44209:42776:6189:6974:6165:44208:6979:6183:71276:71585:70814:6222:6241:42407:51211:15991:33615
6164	purine nucleotide biosynthetic process	16 out of 630 genes, 2.5%	38 out of 5259 background genes, 0.7%	0.00397	0	APT1:ATP18:ATP3:ATP4:ATP20:ADE13:YNK1:ADE12:ADE17:ATP19:ATP5:ATP14:orf19.5597.1:ATP2:orf19.5660.1:ATP16	6228:46938:61508:46777:46084:6106:35786:6168:30448:15986:44209:42776:6189:6974:6165:44208:6979:6183:71276:71585:70814:6241:42407:51211:15991:33615
9152	purine ribonucleotide biosynthetic process	16 out of 630 genes, 2.5%	38 out of 5259 background genes, 0.7%	0.00397	0	APT1:ATP18:ATP3:ATP4:ATP20:ADE13:YNK1:ADE12:ADE17:ATP19:ATP5:ATP14:orf19.5597.1:ATP2:orf19.5660.1:ATP16	6228:46938:61508:46777:46084:6106:35786:6168:30448:15986:44209:42776:6189:6974:6165:44208:6979:6183:71276:71585:70814:6241:42407:51211:15991:33615
278	mitotic cell cycle	50 out of 630 genes, 7.9%	218 out of 5259 background genes, 4.1%	0.00401	0	MAD2:DBF2:TUB4:DUO1:POB3:YCG1:RNA1:NUF2:CDC48:POL2:SHP1:RSR1:SMC3:INN1:orf19.3035:CCN1:orf19.3459:SGO1:DAD2:SEP7:DAD3:CDC14:INT1:HSL1:SMC1:SWI4:POL30:SWI6:SWE1:DAD1:CDC6:AXL2:KIN3:MIF2:ARP4:HOF1:DYN1:CDC5:CSE4:GIN1:orf19.6787:orf19.6789:orf19.6843:MCM1:CLB4:IRR1:ASE1:YRB1:CHT3:MCD1	60565:6261:1178:84:30447:48478:31589:33047:42766:30174:45899:34090:16320:51666:8361:31030:44774:226:76:7019:917:7155:30466:45004:6267:10697:6302:34517:60303:9405:33314:31110:723:61166:2000220:6297:30970:6348:46777:35853:51177:6303:70058:6260:34080:45:30437:43486:70550:1197:32880:31031:6369:40023:1902002:22:30866:10212:43044:6357:7064:1900182:36178:1900445:51726:6913:51255:61408:1990116:31291:7052…
43933	macromolecular complex subunit organization	98 out of 630 genes, 15.6%	531 out of 5259 background genes, 10.1%	0.0046	0	HTA2:orf19.1052:CDC3:HHF1:HHT21:DBF2:TUB4:orf19.1273:DUO1:POB3:RPL3:RPL12:RNA1:TOM6:BZZ1:MDM10:HHT2:HHF22:CDC45:orf19.200:ATP18:RPL11:RPS17B:CDC48:MLC1:USO1:orf19.2650.1:CBF1:CDC68:RPL10:RPL6:CDC12:orf19.3035:UBI3:orf19.3122.2:HTA3:PRE9:ERF1:SGO1:DAD2:ATP4:TIF4631:SEP7:orf19.3686:ASF1:ATP20:DAD3:ARC40:orf19.3994:orf19.4149.1:CEF3:orf19.4230:orf19.4437:NHP6A:MDN1:SEC24:HCM1:orf19.4952.1:ACT1:DAD1:…	2000601:6261:1178:84:30447:2000689:33047:48311:6458:42254:42766:45461:30174:45899:34090:16320:51666:2001165:8361:31030:35955:2001209:32220:80129:7019:917:51260:71470:6351:34551:42026:30466:32784:6267:34517:30100:60303:9651:1015:16337:9405:30518:33314:71963:31110:43935:723:34316:61166:2000220:6337:70584:35066:30970:447:6348:46777:7021:6303:9303:45827:48280:30150:34080:61427:43486:6457:6110:1:33955…
46034	ATP metabolic process	11 out of 630 genes, 1.7%	20 out of 5259 background genes, 0.4%	0.00619	0	ATP18:ATP3:ATP4:ATP20:ATP19:ATP5:ATP14:orf19.5597.1:ATP2:orf19.5660.1:ATP16	35786:15986:42776:42407:15991:33615
43170	macromolecule metabolic process	273 out of 630 genes, 43.3%	1851 out of 5259 background genes, 35.2%	0.00625	0	HTA2:orf19.1052:HHF1:HHT21:ACS2:SSA2:DBF2:VRG4:orf19.1273:VAS1:orf19.1356:orf19.1389:TRA1:orf19.1409.1:TEF1:RPS26A:STT3:POB3:RPL3:YCG1:RPL12:RAD50:RNA1:RPS7A:orf19.1761:RAP1:HHT2:HHF22:orf19.1967:CDC45:orf19.200:KAR2:RPL11:RFA2:orf19.2275:WBP1:orf19.2299:RPL2:RPL29:RPS17B:CDC48:RPL9B:POL2:orf19.2382:SSU72:DPS1-1:MSI3:orf19.2438:orf19.2478.1:orf19.2520:MGE1:orf19.2529:SHP1:CDC60:SMC3:orf19.2650.1:…	32:31848:6261:1178:84:30447:7049:463:48478:55085:43558:6429:7004:33047:6458:722:6325:42766:42254:18027:45461:30174:43066:51518:45899:742:1900101:7114:16320:2001165:8361:1901919:31030:6121:226:35955:71285:2001209:76:6749:51084:80129:917:31929:71470:7023:6351:42026:18065:30466:6228:45004:32784:6267:10697:6302:34517:90529:30100:35863:60303:6616:2188:9263:36177:1015:16337:9405:30518:33314:71963:51083…
32506	cytokinetic process	29 out of 630 genes, 4.6%	102 out of 5259 background genes, 1.9%	0.00722	0	CDC3:DBF2:TUB4:MLC1:RSR1:INN1:CDC12:ENG1:DSE1:SEP7:orf19.3751:SCW11:PMT4:CDC14:INT1:CBK1:ACT1:CHS1:AXL2:KIN3:HOF1:DYN1:CDC5:orf19.6240:MYO1:IQG1:orf19.6787:ASE1:CHT3	32:30447:2000689:31589:51518:1900101:51666:31030:7019:917:7155:71470:90529:30100:9405:71963:33109:61166:2000220:752:16998:35853:60237:30437:43486:36168:32880:31031:40023:22:30866:6357:45861:43936:916:36178:10969:31579:51255:7052:30476:43987:6032:78:31565:30010:1766:71520:9847:36244:30473:1900461:7076:9267:51304:10458:1900233:36170:920:51276:30448:45840:5975:31566:1901648:6997:1900442:6903:31505:7…
6414	translational elongation	10 out of 630 genes, 1.6%	17 out of 5259 background genes, 0.3%	0.00766	0	TEF1:CAM1-1:RPP1A:EFB1:CEF3:RPP2B:orf19.5943.1:RPP2A:RPP0:RPP1B	43558:43066:31929:723:51701:27:6414:6415:6409:6412
6334	nucleosome assembly	12 out of 630 genes, 1.9%	24 out of 5259 background genes, 0.5%	0.00828	0	HTA2:orf19.1052:HHF1:HHT21:HHT2:HHF22:CDC68:HTA3:ASF1:CSE4:orf19.6625:orf19.6843	6261:45899:30466:32784:43935:6337:35066:6348:6303:9303:34080:43486:34729:6357:43618:6352:6306:6336:44030:70911:6335:34401:34724:60261:6974:6281:6334:70481:30702:122:30543:6368:7094:16573:32968:70
910	cytokinesis	33 out of 630 genes, 5.2%	125 out of 5259 background genes, 2.4%	0.00955	0	CDC3:DBF2:TUB4:MLC1:RSR1:INN1:CDC12:ENG1:ERF1:DSE1:SEP7:orf19.3751:ARC40:SCW11:PMT4:CDC14:INT1:CBK1:ACT1:CHS1:AXL2:KIN3:HOF1:DYN1:CDC5:orf19.6240:MYO1:TPM2:IQG1:GIN4:orf19.6787:ASE1:CHT3	32:30447:2000689:31589:51518:1900101:51666:8361:31030:32220:7019:917:7155:71470:90529:30100:9405:71963:33109:61166:2000220:752:16998:46777:35853:60237:30437:43486:36168:32880:31031:40023:22:30866:6357:45861:43936:916:36178:10969:31579:51255:7052:30476:43987:6032:78:31565:30010:1766:71520:9847:36244:30473:51017:1900461:7076:9267:51304:10458:1900233:36170:920:51276:30448:45840:5975:31566:1901648:69…
Molecular Function
GOID	GO_term	Cluster frequency	Background frequency	Corrected P-value	False discovery rate	Gene(s) annotated to the term	Directly Annotated GOID List
3735	structural constituent of ribosome	100 out of 630 genes, 15.9%	156 out of 5259 background genes, 3.0%	4.45e-53	0	orf19.1409.1:RPS26A:RPL3:RPL12:RPS7A:orf19.1967:RPL11:orf19.2275:RPL2:RPL29:RPS17B:RPL9B:orf19.2438:orf19.2478.1:orf19.2520:orf19.2639:orf19.2650.1:RPL28:RPL10:RPP1A:RPL13:RPS16A:RPS1:RPL6:orf19.3061.1:UBI3:orf19.3205:RPS21B:RPS21:orf19.3367:RPL32:RPL10A:RPL23A:MRPL10:orf19.3572.3:orf19.3690.2:orf19.3755:orf19.3797:orf19.3938:RPL43A:orf19.397:orf19.4018:orf19.4149.1:RPS13:RPS5:RPL17B:RPL20B:RPS6A…	3906:3735:19843:31386:46872:166:70181:70180:3723:8097:16740:4525:4784
5198	structural molecule activity	119 out of 630 genes, 18.9%	253 out of 5259 background genes, 4.8%	7.3e-44	0	CDC3:TUB4:orf19.1409.1:RPS26A:RPL3:RPL12:orf19.1672:RPS7A:NUF2:orf19.1967:RPL11:orf19.2275:RPL2:RPL29:RPS17B:RPL9B:orf19.2438:orf19.2478.1:orf19.2520:orf19.2639:orf19.2650.1:RPL28:RPL10:RPP1A:RPL13:RPS16A:RPS1:RPL6:CDC12:orf19.3061.1:UBI3:orf19.3205:RPS21B:RPS21:orf19.3367:RPL32:RPL10A:RPL23A:MRPL10:DAD2:orf19.3572.3:orf19.3690.2:orf19.3755:ATP20:orf19.3797:orf19.3938:RPL43A:orf19.397:orf19.4018:…	3906:3735:19843:43130:15450:46872:5200:166:70181:10485:4784:46961:5525:5198:4708:5524:31386:32947:46982:5545:3924:42803:4713:70180:8017:3723:8097:16740:4525:5078
46933	proton-transporting ATP synthase activity, rotational mechanism	8 out of 630 genes, 1.3%	11 out of 5259 background genes, 0.2%	0.0018	0	ATP18:ATP3:ATP19:ATP5:ATP14:orf19.5597.1:ATP2:ATP16	46933:43531:46961:5524:16887
36094	small molecule binding	117 out of 630 genes, 18.6%	672 out of 5259 background genes, 12.8%	0.00221	0	CDC3:ACS2:SSA2:orf19.1110:orf19.1137:DBF2:HOM3:TUB4:VAS1:orf19.1389:TEF1:RAD50:ARF3:LSC2:ARO2:orf19.2310:CDC48:MIS11:POL2:orf19.2382:DPS1-1:MSI3:MGE1:LYS12:CDC60:RSR1:SMC3:SES1:TYS1:PDC11:HOM6:orf19.2965:LYS2:CDC12:orf19.3035:orf19.3037:MSH2:CCT7:CPA2:TIF:orf19.3459:RHO3:SEP7:orf19.3751:TCP1:HTS1:GLR1:CEF3:GCD11:INT1:HSL1:YNK1:SMC1:GRS1:orf19.4437:NDH51:orf19.4502:ARL1:ILV6:MDN1:ARO1:CRP1:ARG5,6:…	46933:5543:4712:4449:4828:19003:16491:4617:3866:4072:4585:400:4674:3690:32947:4831:3743:16597:16880:9041:4788:287:31072:4340:8865:4774:4813:4821:2161:4017:8569:3682:5198:4871:3984:5524:3688:4812:4362:4003:62:42623:4413:4004:4329:51010:43047:47433:31490:4816:50661:3887:3697:4055:339:4775:4765:4764:35064:31177:4708:3677:4550:5545:3680:49:16887:404:993:8144:51880:30976:31370:10181:4019:51082:5085:39…
97159	organic cyclic compound binding	202 out of 630 genes, 32.1%	1305 out of 5259 background genes, 24.8%	0.00267	0	HTA2:orf19.1052:CDC3:HHF1:HHT21:ACS2:SSA2:orf19.1110:orf19.1137:DBF2:TUB4:PHO4:VAS1:orf19.1389:TEF1:POB3:RAD50:ARF3:orf19.1757:RAP1:LYS1:HHT2:HHF22:LSC2:ARO2:CDC45:orf19.200:RFA2:orf19.2310:CDC48:RPL9B:MIS11:POL2:CCP1:orf19.2382:DPS1-1:HAC1:MSI3:RIM1:MGE1:LYS12:CDC60:RSR1:SMC3:CAM1-1:SES1:TYS1:RPL28:CBF1:PDC11:HOM6:orf19.2965:TIF34:RPL6:CDC12:orf19.3035:orf19.3037:MSH2:NOP1:CCT7:CPA2:HTA3:TIF:RPS…	45142:46933:3747:5543:4712:4449:44377:70181:4828:19003:16491:4617:3866:400:4674:3690:32947:4831:3743:175:16880:9041:981:4788:19843:287:31072:987:4340:8865:978:4774:4813:4821:4017:2161:8569:3682:5198:4871:5524:3688:5527:1191:70180:4812:5528:4362:4003:42623:982:4413:3906:4004:4329:51010:3684:8649:47433:43047:31490:4816:50661:3887:3713:3697:4055:339:4775:4765:4764:35064:4708:4550:3677:42162:3700:554…
1901363	heterocyclic compound binding	201 out of 630 genes, 31.9%	1299 out of 5259 background genes, 24.7%	0.00293	0	HTA2:orf19.1052:CDC3:HHF1:HHT21:ACS2:SSA2:orf19.1110:orf19.1137:DBF2:TUB4:PHO4:VAS1:orf19.1389:TEF1:POB3:RAD50:ARF3:orf19.1757:RAP1:LYS1:HHT2:HHF22:LSC2:ARO2:CDC45:orf19.200:RFA2:orf19.2310:CDC48:RPL9B:MIS11:POL2:CCP1:orf19.2382:DPS1-1:HAC1:MSI3:RIM1:MGE1:LYS12:CDC60:RSR1:SMC3:CAM1-1:SES1:TYS1:RPL28:CBF1:PDC11:HOM6:orf19.2965:TIF34:RPL6:CDC12:orf19.3035:orf19.3037:MSH2:NOP1:CCT7:CPA2:HTA3:TIF:RPS…	45142:46933:3747:5543:4712:4449:44377:70181:4828:19003:16491:4617:3866:400:4674:3690:32947:4831:3743:175:16880:9041:981:4788:19843:287:31072:987:4340:8865:978:4774:4813:4821:4017:2161:8569:3682:5198:4871:5524:3688:5527:1191:70180:4812:5528:4362:4003:42623:982:4413:3906:4004:4329:51010:3684:8649:47433:43047:31490:4816:50661:3887:3713:3697:4055:339:4775:4765:4764:35064:4708:4550:3677:42162:3700:554…
8135	translation factor activity, nucleic acid binding	16 out of 630 genes, 2.5%	42 out of 5259 background genes, 0.8%	0.00459	0	TEF1:CAM1-1:TIF34:TIF:ERF1:EFB1:GCD6:CEF3:GCD11:NIP1:FUN12:TIF11:RPG1A:PRT1:orf19.6748:HCR1	3747:19003:3743:5524:4004:49:16887:16779:5085:43022:31369:33592:16149:3746:5515:5525:166:43565:3924
44769	ATPase activity, coupled to transmembrane movement of ions, rotational mechanism	11 out of 630 genes, 1.7%	22 out of 5259 background genes, 0.4%	0.00508	0	ATP18:ATP3:ATP4:ATP20:ATP19:ATP5:ATP14:orf19.5597.1:ATP2:orf19.5660.1:ATP16	46933:5198:5524:16887:43531:46961
166	nucleotide binding	111 out of 630 genes, 17.6%	646 out of 5259 background genes, 12.3%	0.00758	0.0022	CDC3:ACS2:SSA2:orf19.1110:orf19.1137:DBF2:TUB4:VAS1:orf19.1389:TEF1:RAD50:ARF3:LSC2:ARO2:orf19.2310:CDC48:MIS11:POL2:orf19.2382:DPS1-1:MSI3:MGE1:LYS12:CDC60:RSR1:SMC3:SES1:TYS1:HOM6:orf19.2965:CDC12:orf19.3035:orf19.3037:MSH2:CCT7:CPA2:TIF:orf19.3459:RHO3:SEP7:orf19.3751:TCP1:HTS1:GLR1:CEF3:GCD11:INT1:HSL1:YNK1:SMC1:GRS1:orf19.4437:NDH51:orf19.4502:ARL1:MDN1:ARO1:CRP1:ARG5,6:IDH1:ADE12:SWE1:CBK1:…	46933:5543:4712:4449:4828:19003:16491:4617:3866:400:4674:3690:32947:4831:3743:16880:9041:4788:287:31072:4340:8865:4774:4813:4821:4017:2161:8569:3682:5198:4871:5524:3688:4812:4362:4003:42623:4413:4004:4329:51010:43047:31490:4816:50661:3887:3697:4055:339:4775:4765:4764:35064:4708:3677:4550:5545:3680:49:16887:404:993:8144:51880:31370:10181:4019:51082:5085:3991:4478:5078:4008:3735:43022:1901916:31369…
1901265	nucleoside phosphate binding	111 out of 630 genes, 17.6%	646 out of 5259 background genes, 12.3%	0.00758	0.002	CDC3:ACS2:SSA2:orf19.1110:orf19.1137:DBF2:TUB4:VAS1:orf19.1389:TEF1:RAD50:ARF3:LSC2:ARO2:orf19.2310:CDC48:MIS11:POL2:orf19.2382:DPS1-1:MSI3:MGE1:LYS12:CDC60:RSR1:SMC3:SES1:TYS1:HOM6:orf19.2965:CDC12:orf19.3035:orf19.3037:MSH2:CCT7:CPA2:TIF:orf19.3459:RHO3:SEP7:orf19.3751:TCP1:HTS1:GLR1:CEF3:GCD11:INT1:HSL1:YNK1:SMC1:GRS1:orf19.4437:NDH51:orf19.4502:ARL1:MDN1:ARO1:CRP1:ARG5,6:IDH1:ADE12:SWE1:CBK1:…	46933:5543:4712:4449:4828:19003:16491:4617:3866:400:4674:3690:32947:4831:3743:16880:9041:4788:287:31072:4340:8865:4774:4813:4821:4017:2161:8569:3682:5198:4871:5524:3688:4812:4362:4003:42623:4413:4004:4329:51010:43047:31490:4816:50661:3887:3697:4055:339:4775:4765:4764:35064:4708:3677:4550:5545:3680:49:16887:404:993:8144:51880:31370:10181:4019:51082:5085:3991:4478:5078:4008:3735:43022:1901916:31369…
5488	binding	295 out of 630 genes, 46.8%	2067 out of 5259 background genes, 39.3%	0.00971	0.0018	orf19.1012:MAD2:HTA2:orf19.1052:CDC3:HHF1:HHT21:ACS2:SSA2:orf19.1110:orf19.1137:orf19.1180:DBF2:HOM3:TUB4:PHO4:SEC23:orf19.1273:VAS1:orf19.1389:DUO1:TEF1:orf19.1495:POB3:RAD50:orf19.1672:ARF3:orf19.1757:RAP1:LYS1:HHT2:HHF22:LSC2:NUF2:ARO2:CDC45:orf19.200:KAR2:RFA2:orf19.2310:CDC48:RPL9B:MIS11:POL2:CCP1:orf19.2382:DPS1-1:MLC1:HAC1:MSI3:RIM1:MGE1:LYS12:SHP1:MET6:CDC60:RSR1:SMC3:CAM1-1:SES1:TYS1:orf…	45142:5543:4712:5516:4449:44377:4338:5099:4617:4409:70273:4585:16747:30955:32947:4618:16597:175:43014:5094:4788:19843:31072:4340:978:4774:4813:4821:4017:2161:8569:5198:3984:5524:3688:5527:52862:4362:4003:62:15266:982:4413:3906:4329:3684:47433:43047:31490:50661:3887:3713:3697:8092:4765:30276:4550:4177:3680:49:3824:3992:993:30976:1671:15450:3879:1135:8289:10181:4866:4743:5085:15197:1054:4190:3991:1…
Cellular Component
GOID	GO_term	Cluster frequency	Background frequency	Corrected P-value	False discovery rate	Gene(s) annotated to the term	Directly Annotated GOID List
5840	ribosome	115 out of 630 genes, 18.3%	249 out of 5259 background genes, 4.7%	2.9e-41	0	orf19.1409.1:RPS26A:RPL3:RPL12:RPS7A:orf19.1967:RPL11:orf19.2275:RPL2:RPL29:RPS17B:CDC48:RPL9B:orf19.2438:orf19.2478.1:orf19.2520:orf19.2639:orf19.2650.1:RPL10:RPP1A:RPL13:RPS16A:RPS1:RPL6:orf19.3037:orf19.3061.1:UBI3:NOP1:orf19.3185:orf19.3205:TMA19:RPS21B:RPS21:orf19.3367:RPL32:RPL10A:RPL23A:MRPL10:orf19.3572.3:orf19.3690.2:orf19.3755:orf19.3797:EFB1:orf19.3938:RPL43A:orf19.397:orf19.4018:orf19…	5763:9986:97002:32040:31415:42645:31966:5762:16021:42788:30687:5886:790:15934:5844:228:22625:34098:30686:30445:22627:15935:36266:5761:5737:30061:5829:1990112:5840:5739:19867:5854:837:5743:30688:31428:5819:5730:16020:5634:22626:43332:10494:5576:5853
44391	ribosomal subunit	65 out of 630 genes, 10.3%	130 out of 5259 background genes, 2.5%	1.2e-24	0	orf19.1409.1:orf19.1967:RPL2:RPL29:CDC48:RPL9B:orf19.2438:orf19.2478.1:orf19.2520:orf19.2639:orf19.2650.1:RPS1:RPL6:UBI3:orf19.3205:RPS21B:RPS21:orf19.3367:RPL32:RPL10A:MRPL10:orf19.3572.3:orf19.3690.2:orf19.3755:orf19.3797:orf19.3938:orf19.397:orf19.4018:orf19.4149.1:RPS13:RPS5:RPL17B:RPS6A:RPL15A:orf19.498:FUN12:MRPS9:orf19.5420:orf19.549:orf19.5684:orf19.585:RPS15:RPS19A:RPL16A:MRPL8:orf19.613…	5763:9986:97002:32040:31966:5762:16021:5886:790:15934:22625:34098:30686:30445:22627:15935:36266:30061:1990112:5829:5840:5739:837:5743:30688:16020:5730:5634:43332:5576
43228	non-membrane-bounded organelle	215 out of 630 genes, 34.1%	984 out of 5259 background genes, 18.7%	1.26e-20	0	MAD2:HTA2:orf19.1052:CDC3:HHF1:HHT21:ACS2:DBF2:TUB4:TRA1:orf19.1409.1:DUO1:RPS26A:POB3:RPL3:YCG1:RPL12:BZZ1:RPS7A:RAP1:HHT2:HHF22:NUF2:orf19.1967:CDC45:RPL11:RFA2:orf19.2275:RPL2:RPL29:RPS17B:CDC48:RPL9B:POL2:MLC1:orf19.2438:orf19.2478.1:RIM1:orf19.2520:SMC3:orf19.2639:orf19.2650.1:INN1:CBF1:CDC68:RPL10:RPP1A:RPL13:RPS16A:RPS1:RPL6:CDC12:orf19.3035:orf19.3037:orf19.3061.1:UBI3:MSH2:NOP1:orf19.318…	5666:5724:5763:5628:9986:42645:30864:31966:51286:785:798:5881:5816:70210:5826:31617:775:31261:5688:33597:5887:32153:22625:923:243:5662:22627:31560:44697:16593:36266:46695:33698:31298:5940:5840:31933:19867:932:5635:30688:31982:31262:30015:71958:43332:1400:5853:812:32432:31011:31415:794:71541:30874:31618:35101:35327:30687:5880:228:8023:783:32301:31105:34098:5935:776:30445:15935:5761:124:131:1990112…
43232	intracellular non-membrane-bounded organelle	215 out of 630 genes, 34.1%	984 out of 5259 background genes, 18.7%	1.26e-20	0	MAD2:HTA2:orf19.1052:CDC3:HHF1:HHT21:ACS2:DBF2:TUB4:TRA1:orf19.1409.1:DUO1:RPS26A:POB3:RPL3:YCG1:RPL12:BZZ1:RPS7A:RAP1:HHT2:HHF22:NUF2:orf19.1967:CDC45:RPL11:RFA2:orf19.2275:RPL2:RPL29:RPS17B:CDC48:RPL9B:POL2:MLC1:orf19.2438:orf19.2478.1:RIM1:orf19.2520:SMC3:orf19.2639:orf19.2650.1:INN1:CBF1:CDC68:RPL10:RPP1A:RPL13:RPS16A:RPS1:RPL6:CDC12:orf19.3035:orf19.3037:orf19.3061.1:UBI3:MSH2:NOP1:orf19.318…	5666:5724:5763:5628:9986:42645:30864:31966:51286:785:798:5881:5816:70210:5826:31617:775:31261:5688:33597:5887:32153:22625:923:243:5662:22627:31560:44697:16593:36266:46695:33698:31298:5940:5840:31933:19867:932:5635:30688:31982:31262:30015:71958:43332:1400:5853:812:32432:31011:31415:794:71541:30874:31618:35101:35327:30687:5880:228:8023:783:32301:31105:34098:5935:776:30445:15935:5761:124:131:1990112…
22626	cytosolic ribosome	41 out of 630 genes, 6.5%	68 out of 5259 background genes, 1.3%	5.04e-19	0	orf19.1409.1:RPL2:RPL29:CDC48:RPL9B:orf19.2478.1:RPS1:RPL6:UBI3:orf19.3185:RPS21B:RPS21:RPL32:orf19.3572.3:orf19.3690.2:orf19.4149.1:CEF3:RPS13:RPS5:RPL17B:RPS6A:RPL15A:FUN12:GCN1:orf19.5943.1:RPS19A:RPS23A:RPS22A:RPS27:RPS3:RPS20:orf19.6415.1:RPS12:RPS8A:orf19.6882.1:ASC1:YST1:RPS28B:orf19.7617:RPL39:RPS9B	9986:22625:22627:36266:5840:30688:43332:31415:34098:30445:1990112:16020:5634:5576:5886:790:30686:837:22626:32040:16021:5844:5829:5739:5730
5829	cytosol	261 out of 630 genes, 41.4%	1340 out of 5259 background genes, 25.5%	1.89e-18	0	orf19.1012:CDC3:ACS2:SSA2:orf19.1137:DBF2:HOM3:orf19.1273:VAS1:orf19.1409.1:TEF1:APT1:RPS26A:orf19.1495:POB3:RPL3:YCG1:RPL12:RNA1:RPS7A:orf19.1761:RAP1:HIS3:NUF2:ARO2:CDC45:RPS10:RPL11:SPE3:RFA2:orf19.2269:orf19.2299:orf19.2306:RPL2:RPL29:RPS17B:CDC48:RPL9B:MIS11:CCP1:orf19.2382:SSU72:DPS1-1:SYS3:MLC1:MSI3:orf19.2468:orf19.2478.1:TRP2:MET6:CDC60:SMC3:CAM1-1:SES1:TYS1:orf19.2828:PDC11:MET13:RPL10:…	5666:8250:5628:9986:42645:30864:46658:31966:51286:785:5881:798:30008:329:5816:5759:5826:31617:31261:5851:32153:22625:243:5971:42597:5662:17053:22627:30121:31560:30126:36266:31298:5940:5840:932:8541:5635:5950:70971:30688:5801:31982:15:31262:71958:34515:31201:43332:1400:18444:5853:43529:17102:42175:812:139:32432:31011:31415:794:71541:30134:35101:30687:228:42719:783:32301:31105:34098:5935:776:30445:…
44445	cytosolic part	56 out of 630 genes, 8.9%	124 out of 5259 background genes, 2.4%	3.06e-18	0	SSA2:orf19.1273:orf19.1409.1:RPL2:RPL29:CDC48:RPL9B:orf19.2478.1:RPS1:RPL6:UBI3:orf19.3122.2:orf19.3185:CCT7:RPS21B:RPS21:RPL32:PRE9:orf19.3572.3:orf19.3690.2:ENO1:TCP1:orf19.4149.1:CEF3:RPS13:orf19.4230:RPS5:RPL17B:RPS6A:RPL15A:RPN1:FUN12:GCN1:SGT2:orf19.5943.1:RPS19A:RPS23A:RPS22A:RPS27:RPS3:RPS20:orf19.6415.1:YKE2:RPS12:RPS8A:orf19.6882.1:ASC1:YST1:PRE3:RPS28B:PUP2:orf19.7199:PUP1:orf19.7617:R…	9986:329:22625:22627:36266:5840:8541:5635:30688:15:34515:43332:31415:34098:30445:5832:1990112:16020:5634:5576:19773:324:5886:790:30686:5622:8540:837:5839:9277:22626:32040:16021:5844:72380:30446:5829:5783:5739:19774:5730:16272
30529	ribonucleoprotein complex	134 out of 630 genes, 21.3%	524 out of 5259 background genes, 10.0%	2.24e-17	0	SSA2:orf19.1409.1:RPS26A:RPL3:RPL12:RPS7A:orf19.1967:RPL11:orf19.2275:RPL2:RPL29:RPS17B:CDC48:RPL9B:MSI3:orf19.2438:orf19.2478.1:orf19.2520:orf19.2639:orf19.2650.1:RPL10:TIF34:RPP1A:RPL13:RPS16A:RPS1:RPL6:orf19.3037:orf19.3061.1:UBI3:NOP1:orf19.3185:orf19.3205:TMA19:RPS21B:RPS21:orf19.3367:RPL32:RPL10A:RPL23A:MRPL10:orf19.3572.3:TIF4631:orf19.3690.2:orf19.3755:orf19.3797:EFB1:orf19.3938:RPL43A:or…	5763:5684:9986:42645:31966:329:5688:22625:243:22627:36266:5840:19867:932:30688:30015:43332:5853:42175:31415:71541:30687:228:34098:30445:5832:15935:5686:5761:131:1990112:5682:43614:5685:5819:31428:16020:5634:10494:5576:16281:5732:5762:42788:5886:790:15934:16282:30686:71004:5737:5854:837:5743:9277:22626:5850:97002:32040:16021:71540:5844:46540:30446:30061:5829:5739:5730:5846:34399
44444	cytoplasmic part	444 out of 630 genes, 70.5%	2855 out of 5259 background genes, 54.3%	2.47e-16	0	orf19.1012:CDC3:ACS2:SSA2:orf19.1137:DBF2:VRG4:HOM3:TUB4:SEC23:orf19.1273:VAS1:orf19.1356:orf19.1409.1:orf19.1426:TEF1:APT1:RPS26A:STT3:orf19.1495:TIM17:POB3:ZRT2:RPL3:YCG1:RPL12:RAD50:RNA1:TOM6:orf19.1672:TOS1:BZZ1:RPS7A:orf19.1761:RAP1:HIS3:MDM10:LSC2:NUF2:orf19.1967:ARO2:CDC45:KAR2:ATP18:RPS10:RPL11:SPE3:RFA2:orf19.2269:orf19.2275:WBP1:orf19.2299:orf19.2306:RPL2:RPL29:ERP5:RPS17B:CDC48:RPL9B:M…	5666:8250:5763:5628:276:9986:5744:42645:30864:36286:46658:31966:51286:785:798:5881:30008:329:5816:70210:5750:5759:5826:31617:31261:5688:5851:5887:32153:22625:923:9898:243:5971:42597:5662:17053:22627:30121:31560:44697:46695:36266:30126:31298:44284:5940:5840:33254:19867:932:8541:5635:275:5950:70971:5960:30688:32865:5801:31982:15:31262:30015:71958:34515:31201:43332:1400:18444:5784:5853:43529:17102:4…
32991	macromolecular complex	304 out of 630 genes, 48.3%	1726 out of 5259 background genes, 32.8%	2.41e-15	0	orf19.1012:MAD2:HTA2:orf19.1052:CDC3:HHF1:HHT21:SSA2:DBF2:TUB4:SEC23:orf19.1273:TRA1:orf19.1409.1:DUO1:RPS26A:STT3:TIM17:POB3:RPL3:YCG1:RPL12:RAD50:TOM6:orf19.1672:RPS7A:orf19.1761:RAP1:MDM10:HHT2:HHF22:NUF2:orf19.1967:CDC45:KAR2:ATP18:RPL11:RFA2:orf19.2275:WBP1:RPL2:RPL29:RPS17B:CDC48:RPL9B:POL2:SSU72:MLC1:MSI3:orf19.2438:orf19.2478.1:orf19.2520:MGE1:orf19.2533.1:TRP2:SMC3:orf19.2639:PCL1:orf19.…	5666:8250:5669:5684:276:9986:5744:30864:36286:51286:798:5881:30008:70210:5759:5688:33597:32153:5662:22627:30121:31560:44697:36266:46695:33254:8541:5950:5960:32865:31982:15:31262:30015:34515:32299:18444:5784:5853:812:5789:139:31415:794:30874:35101:35327:5880:8023:783:32301:34098:776:5761:124:131:5768:307:5794:5938:71261:5685:5845:10494:5741:778:32160:19773:31965:5658:324:780:5762:42788:16460:5756:…
5737	cytoplasm	480 out of 630 genes, 76.2%	3274 out of 5259 background genes, 62.3%	6.1e-13	0	orf19.1012:CDC3:ACS2:SSA2:orf19.1110:GUK1:orf19.1137:orf19.1180:DBF2:VRG4:HOM3:TUB4:PHO4:SEC23:orf19.1273:VAS1:orf19.1356:orf19.1389:orf19.1409.1:orf19.1426:TEF1:APT1:RPS26A:STT3:orf19.1495:TIM17:AMN1:POB3:ZRT2:RPL3:YCG1:RPL12:RAD50:RNA1:TOM6:orf19.1672:TOS1:BZZ1:RPS7A:RKI1:orf19.1757:orf19.1761:RAP1:LYS1:HIS3:MDM10:LSC2:NUF2:orf19.1967:ARO2:CDC45:KAR2:ATP18:RPS10:RPL11:SPE3:RFA2:orf19.2269:orf19…	5666:8250:276:9986:5744:30864:36286:46658:51286:798:5881:30008:70210:5759:5688:5887:32153:42597:5662:22627:30121:31560:44697:46695:36266:33254:8541:5950:5960:32865:31982:15:31262:30015:34515:18444:5784:5853:812:5789:139:31415:794:30874:35101:5880:783:32301:34098:776:5761:124:131:5768:5794:5938:71261:5685:31305:9897:10494:5741:778:32160:19773:31965:5658:324:5762:42788:16460:35267:5756:786:15629:35…
22627	cytosolic small ribosomal subunit	22 out of 630 genes, 3.5%	29 out of 5259 background genes, 0.6%	9e-13	0	RPS1:UBI3:RPS21B:RPS21:orf19.4149.1:RPS13:RPS5:RPS6A:FUN12:RPS19A:RPS23A:RPS22A:RPS27:RPS3:RPS20:orf19.6415.1:RPS12:RPS8A:ASC1:YST1:RPS28B:RPS9B	9986:22627:30686:5730:5840:30688:30445:16020:5634:5576:32040:16021:5739
15935	small ribosomal subunit	32 out of 630 genes, 5.1%	59 out of 5259 background genes, 1.1%	1.1e-12	0	orf19.2438:orf19.2520:orf19.2650.1:RPS1:UBI3:RPS21B:RPS21:orf19.3938:orf19.4018:orf19.4149.1:RPS13:RPS5:RPS6A:orf19.498:FUN12:MRPS9:RPS15:RPS19A:RPS23A:RPS22A:RPS27:RPS3:RPS20:orf19.6415.1:RPS12:RPS8A:orf19.688:ASC1:YST1:RPS28B:RPS9B:MRP17	9986:22627:30686:5730:5763:31966:5840:30688:30445:15935:16020:5634:5576:32040:16021:5739
9986	cell surface	53 out of 630 genes, 8.4%	152 out of 5259 background genes, 2.9%	2.28e-11	0	SSA2:RBT1:FRE10:TEF1:RPL3:TOS1:RPS7A:KAR2:RPS10:CDC48:PGA26:orf19.2478.1:MET6:PGA54:PGA38:PGA59:PDC11:RPL10:RPL13:RPL6:ENG1:CDC19:YWP1:PGK1:PHR1:EFB1:SCW11:CHT2:ENO1:CEF3:INT1:TAL1:RPL17B:RPL20B:RPS6A:PGA6:RPL14:ACT1:CHS1:RBR1:ATP2:EGD2:RPL19A:HSP90:SAM2:PLB3:TPI1:RPS8A:RPL4B:RBE1:INO1:CHT3:PGA14	9986:30864:46658:51286:42597:22627:36266:15:5853:812:34098:43187:5794:9897:5741:31965:324:42788:35267:15629:30686:5737:5884:5854:30428:22626:45121:9514:34099:30446:5829:5783:30479:33101:5730:5628:329:5621:22625:5940:5840:5635:43332:32432:31011:5935:30445:5832:1990112:16020:5634:5576:5886:790:5622:142:837:9277:5933:5754:32040:16021:5844:5739:1411
15934	large ribosomal subunit	33 out of 630 genes, 5.2%	71 out of 5259 background genes, 1.4%	1.34e-10	0	orf19.1409.1:orf19.1967:RPL2:RPL29:CDC48:RPL9B:orf19.2478.1:orf19.2639:RPL6:orf19.3205:orf19.3367:RPL32:RPL10A:MRPL10:orf19.3572.3:orf19.3690.2:orf19.3755:orf19.3797:orf19.397:RPL17B:RPL15A:orf19.5420:orf19.549:orf19.5684:orf19.585:RPL16A:MRPL8:orf19.6136:orf19.6565:orf19.6882.1:orf19.7485:orf19.7675:RPL39	9986:36266:34098:5762:97002:30061:5829:5730:31966:22625:43332:1990112:16020:5634:5576:5886:790:15934:837:5743:32040:16021:5739
44464	cell part	556 out of 630 genes, 88.3%	4105 out of 5259 background genes, 78.1%	6.51e-10	0	orf19.1012:MAD2:HTA2:orf19.1052:CDC3:HHF1:HHT21:ACS2:SSA2:orf19.1110:GUK1:orf19.1137:orf19.1180:DBF2:VRG4:HOM3:TUB4:PHO4:SEC23:orf19.1273:VAS1:RBT1:orf19.1356:orf19.1389:TRA1:orf19.1409.1:FRE10:orf19.1426:DUO1:TEF1:APT1:RPS26A:STT3:orf19.1495:TIM17:AMN1:POB3:ZRT2:RPL3:YCG1:RPL12:RAD50:RNA1:TOM6:orf19.1672:TOS1:BZZ1:RPS7A:RKI1:ARF3:orf19.1757:orf19.1761:RAP1:LYS1:HIS3:MDM10:HHT2:HHF22:LSC2:NUF2:or…	5666:8250:5669:5684:276:9986:5744:30864:36286:46658:51286:798:5881:30008:70210:5759:5688:33597:5887:32153:42597:5662:22627:30121:31560:44697:36266:46695:33254:8541:5950:5960:32865:31982:15:31262:30015:34515:32299:18444:5784:5853:812:5789:139:31415:794:30874:35101:35327:5880:8023:783:32301:34098:776:5761:124:131:5768:43187:307:5794:5938:71261:5685:31305:5845:9897:10494:5741:778:32160:19773:31965:5…
5623	cell	556 out of 630 genes, 88.3%	4105 out of 5259 background genes, 78.1%	6.51e-10	0	orf19.1012:MAD2:HTA2:orf19.1052:CDC3:HHF1:HHT21:ACS2:SSA2:orf19.1110:GUK1:orf19.1137:orf19.1180:DBF2:VRG4:HOM3:TUB4:PHO4:SEC23:orf19.1273:VAS1:RBT1:orf19.1356:orf19.1389:TRA1:orf19.1409.1:FRE10:orf19.1426:DUO1:TEF1:APT1:RPS26A:STT3:orf19.1495:TIM17:AMN1:POB3:ZRT2:RPL3:YCG1:RPL12:RAD50:RNA1:TOM6:orf19.1672:TOS1:BZZ1:RPS7A:RKI1:ARF3:orf19.1757:orf19.1761:RAP1:LYS1:HIS3:MDM10:HHT2:HHF22:LSC2:NUF2:or…	5666:8250:5669:5684:276:9986:5744:30864:36286:46658:51286:798:5881:30008:70210:5759:5688:33597:5887:32153:42597:5662:22627:30121:31560:44697:36266:46695:33254:8541:5950:5960:32865:31982:15:31262:30015:34515:32299:18444:5784:5853:812:5789:139:31415:794:30874:35101:35327:5880:8023:783:32301:34098:776:5761:124:131:5768:43187:307:5794:5938:71261:5685:31305:5845:9897:10494:5741:778:32160:19773:31965:5…
5622	intracellular	531 out of 630 genes, 84.3%	3934 out of 5259 background genes, 74.8%	2.54e-07	0	orf19.1012:MAD2:HTA2:orf19.1052:CDC3:HHF1:HHT21:ACS2:SSA2:orf19.1110:GUK1:orf19.1137:orf19.1180:DBF2:VRG4:HOM3:TUB4:PHO4:SEC23:orf19.1273:VAS1:orf19.1356:orf19.1389:TRA1:orf19.1409.1:orf19.1426:DUO1:TEF1:APT1:RPS26A:STT3:orf19.1495:TIM17:AMN1:POB3:ZRT2:RPL3:YCG1:RPL12:RAD50:RNA1:TOM6:orf19.1672:TOS1:BZZ1:RPS7A:RKI1:ARF3:orf19.1757:orf19.1761:RAP1:LYS1:HIS3:MDM10:HHT2:HHF22:LSC2:NUF2:orf19.1967:AR…	5666:8250:5669:5684:276:9986:5744:30864:36286:46658:51286:798:5881:30008:70210:5759:5688:33597:5887:32153:42597:5662:22627:30121:31560:44697:36266:46695:33254:8541:5950:5960:32865:31982:15:31262:30015:34515:32299:18444:5784:5853:812:5789:139:31415:794:30874:35101:35327:5880:8023:783:32301:34098:776:5761:124:131:5768:307:5794:5938:71261:5685:31305:5845:9897:10494:5741:778:32160:19773:31965:5658:32…
44424	intracellular part	529 out of 630 genes, 84.0%	3917 out of 5259 background genes, 74.5%	3.01e-07	0	orf19.1012:MAD2:HTA2:orf19.1052:CDC3:HHF1:HHT21:ACS2:SSA2:orf19.1110:GUK1:orf19.1137:orf19.1180:DBF2:VRG4:HOM3:TUB4:PHO4:SEC23:orf19.1273:VAS1:orf19.1356:orf19.1389:TRA1:orf19.1409.1:orf19.1426:DUO1:TEF1:APT1:RPS26A:STT3:orf19.1495:TIM17:AMN1:POB3:ZRT2:RPL3:YCG1:RPL12:RAD50:RNA1:TOM6:orf19.1672:TOS1:BZZ1:RPS7A:RKI1:orf19.1757:orf19.1761:RAP1:LYS1:HIS3:MDM10:HHT2:HHF22:LSC2:NUF2:orf19.1967:ARO2:CD…	5666:8250:5669:5684:276:9986:5744:30864:36286:46658:51286:798:5881:30008:70210:5759:5688:33597:5887:32153:42597:5662:22627:30121:31560:44697:36266:46695:33254:8541:5950:5960:32865:31982:15:31262:30015:34515:32299:18444:5784:5853:812:5789:139:31415:794:30874:35101:35327:5880:8023:783:32301:34098:776:5761:124:131:5768:307:5794:5938:71261:5685:31305:5845:9897:10494:5741:778:32160:19773:31965:5658:32…
45259	proton-transporting ATP synthase complex	11 out of 630 genes, 1.7%	14 out of 5259 background genes, 0.3%	5.97e-06	0	ATP18:ATP3:ATP4:ATP20:ATP19:ATP5:ATP14:orf19.5597.1:ATP2:orf19.5660.1:ATP16	9986:276:5741:5756:5829:275:16020:5886:5754:274
5753	mitochondrial proton-transporting ATP synthase complex	11 out of 630 genes, 1.7%	14 out of 5259 background genes, 0.3%	5.97e-06	0	ATP18:ATP3:ATP4:ATP20:ATP19:ATP5:ATP14:orf19.5597.1:ATP2:orf19.5660.1:ATP16	9986:276:5741:5756:5829:275:16020:5886:5754:274
22625	cytosolic large ribosomal subunit	14 out of 630 genes, 2.2%	24 out of 5259 background genes, 0.5%	2.32e-05	0	orf19.1409.1:RPL2:RPL29:CDC48:RPL9B:orf19.2478.1:RPL6:RPL32:orf19.3572.3:orf19.3690.2:RPL17B:RPL15A:orf19.6882.1:RPL39	9986:36266:34098:5829:5730:22625:43332:1990112:16020:5634:5576:5886:790:837:5739
5759	mitochondrial matrix	41 out of 630 genes, 6.5%	154 out of 5259 background genes, 2.9%	0.00012	0	orf19.1967:orf19.2275:RIM1:orf19.2520:MGE1:orf19.2639:orf19.2650.1:orf19.3205:LSC1:orf19.3367:MRPL10:orf19.3755:ARG8:orf19.3797:orf19.3938:orf19.397:GCF1:orf19.4018:YHM2:ILV6:orf19.4727:ARG5,6:IDH1:orf19.498:IDP1:MRPS9:orf19.5433:orf19.549:ARG3:orf19.5684:IDH2:orf19.585:MRPL8:orf19.6136:orf19.6565:orf19.688:HSP60:orf19.7485:orf19.7675:ILV5:MRP17	5759:5761:5762:97002:5962:30061:5829:5730:5763:42645:31966:5634:5576:5886:5777:5743:5749:5948:16021:1405:5739
43229	intracellular organelle	478 out of 630 genes, 75.9%	3543 out of 5259 background genes, 67.4%	0.00015	0	orf19.1012:MAD2:HTA2:orf19.1052:CDC3:HHF1:HHT21:ACS2:SSA2:GUK1:orf19.1137:orf19.1180:DBF2:VRG4:TUB4:PHO4:SEC23:VAS1:orf19.1356:TRA1:orf19.1409.1:DUO1:TEF1:APT1:RPS26A:STT3:orf19.1495:TIM17:AMN1:POB3:ZRT2:RPL3:YCG1:RPL12:RAD50:RNA1:TOM6:orf19.1672:TOS1:BZZ1:RPS7A:RKI1:orf19.1757:orf19.1761:RAP1:HIS3:MDM10:HHT2:HHF22:LSC2:NUF2:orf19.1967:ARO2:CDC45:orf19.200:KAR2:ATP18:RPL11:SPE3:RFA2:orf19.2269:or…	5666:8250:5669:5684:276:9986:5744:30864:36286:46658:51286:798:5881:30008:70210:5759:5688:33597:5887:32153:42597:5662:22627:30121:31560:44697:36266:46695:33254:8541:5950:5960:32865:31982:15:31262:30015:34515:32299:18444:5784:5853:812:5789:139:31415:794:30874:35101:35327:5880:8023:783:32301:34098:776:5761:124:131:5768:307:5794:5938:71261:5685:31305:9897:10494:5741:778:32160:19773:31965:5658:324:780…
43226	organelle	478 out of 630 genes, 75.9%	3544 out of 5259 background genes, 67.4%	0.00016	0	orf19.1012:MAD2:HTA2:orf19.1052:CDC3:HHF1:HHT21:ACS2:SSA2:GUK1:orf19.1137:orf19.1180:DBF2:VRG4:TUB4:PHO4:SEC23:VAS1:orf19.1356:TRA1:orf19.1409.1:DUO1:TEF1:APT1:RPS26A:STT3:orf19.1495:TIM17:AMN1:POB3:ZRT2:RPL3:YCG1:RPL12:RAD50:RNA1:TOM6:orf19.1672:TOS1:BZZ1:RPS7A:RKI1:orf19.1757:orf19.1761:RAP1:HIS3:MDM10:HHT2:HHF22:LSC2:NUF2:orf19.1967:ARO2:CDC45:orf19.200:KAR2:ATP18:RPL11:SPE3:RFA2:orf19.2269:or…	5666:8250:5669:5684:276:9986:5744:30864:36286:46658:51286:798:5881:30008:70210:5759:5688:33597:5887:32153:42597:5662:22627:30121:31560:44697:36266:46695:33254:8541:5950:5960:32865:31982:15:31262:30015:34515:32299:18444:5784:5853:812:5789:139:31415:794:30874:35101:35327:5880:8023:783:32301:34098:776:5761:124:131:5768:307:5794:5938:71261:5685:31305:9897:10494:5741:778:32160:19773:31965:5658:324:780…
1990104	DNA bending complex	9 out of 630 genes, 1.4%	12 out of 5259 background genes, 0.2%	0.00026	0	HTA2:orf19.1052:HHF1:HHT21:RAP1:HHT2:HHF22:HTA3:CSE4	812:783:776:780:786:31934:5829:775:31298:31933:31011:31618:5634:43505:790:5727:788:5739
786	nucleosome	9 out of 630 genes, 1.4%	12 out of 5259 background genes, 0.2%	0.00026	0	HTA2:orf19.1052:HHF1:HHT21:RAP1:HHT2:HHF22:HTA3:CSE4	812:783:776:780:786:31934:5829:775:31298:31933:31011:31618:5634:43505:790:5727:788:5739
313	organellar ribosome	25 out of 630 genes, 4.0%	76 out of 5259 background genes, 1.4%	0.00039	0	orf19.1967:orf19.2275:orf19.2520:orf19.2639:orf19.2650.1:orf19.3205:orf19.3367:MRPL10:orf19.3755:orf19.3797:orf19.3938:orf19.397:orf19.4018:orf19.498:MRPS9:orf19.549:orf19.5684:orf19.585:MRPL8:orf19.6136:orf19.6565:orf19.688:orf19.7485:orf19.7675:MRP17	5761:5762:97002:30061:5829:5730:5763:42645:31966:5634:5743:16021:5739
5761	mitochondrial ribosome	25 out of 630 genes, 4.0%	76 out of 5259 background genes, 1.4%	0.00039	0	orf19.1967:orf19.2275:orf19.2520:orf19.2639:orf19.2650.1:orf19.3205:orf19.3367:MRPL10:orf19.3755:orf19.3797:orf19.3938:orf19.397:orf19.4018:orf19.498:MRPS9:orf19.549:orf19.5684:orf19.585:MRPL8:orf19.6136:orf19.6565:orf19.688:orf19.7485:orf19.7675:MRP17	5761:5762:97002:30061:5829:5730:5763:42645:31966:5634:5743:16021:5739
44429	mitochondrial part	84 out of 630 genes, 13.3%	436 out of 5259 background genes, 8.3%	0.00101	0	TIM17:TOM6:MDM10:orf19.1967:ATP18:orf19.2275:CDC48:CCP1:RIM1:orf19.2520:MGE1:orf19.2639:orf19.2650.1:QCR9:LSP1:orf19.3205:ATP3:MRS7:LSC1:orf19.3367:MRPL10:ATP4:ERG9:orf19.3755:ATP20:ARG8:orf19.3782.2:orf19.3797:orf19.3938:orf19.397:GCF1:orf19.4016:orf19.4018:SDH4:PAM18:YHM2:YNK1:NDH51:TIM10:TIM12:ILV6:orf19.4727:ARG5,6:IDH1:URA1:orf19.4865:orf19.498:DPM1:IDP1:MRPS9:ATP19:ATP5:orf19.5433:orf19.549…	9986:276:5744:36286:5759:36266:32865:5789:34098:5761:31305:5741:5762:5756:1401:97002:5962:5742:30061:5829:5783:31304:5747:5730:42721:5763:42645:31966:5750:22625:9898:44284:275:43332:42175:30176:36362:42719:1990112:32126:16020:5634:5576:5886:790:19898:5777:30173:837:5743:5754:5749:274:5948:16021:1405:5758:5739:35339
5618	cell wall	31 out of 630 genes, 4.9%	113 out of 5259 background genes, 2.1%	0.00174	0	CDC3:SSA2:RBT1:TEF1:TOS1:MET6:RSR1:PGA59:PDC11:ENG1:CDC19:YWP1:DSE1:PGK1:PHR1:SCW11:CHT2:ENO1:CEF3:RPS6A:PGA6:HSP90:SAM2:PRT1:TPI1:orf19.7104:RBE1:INO1:CHT3:XYL2:PGA14	9986:46658:22627:15:131:43187:5938:9897:10494:32160:324:30686:5737:30428:22626:45121:144:30446:5829:5783:33101:5628:329:5621:5940:5635:1400:71541:31105:5935:30445:5832:43614:16020:5634:32168:5576:5619:5886:16282:5622:9277:32040:71540:5844:5739:1411
9277	fungal-type cell wall	31 out of 630 genes, 4.9%	113 out of 5259 background genes, 2.1%	0.00174	0	CDC3:SSA2:RBT1:TEF1:TOS1:MET6:RSR1:PGA59:PDC11:ENG1:CDC19:YWP1:DSE1:PGK1:PHR1:SCW11:CHT2:ENO1:CEF3:RPS6A:PGA6:HSP90:SAM2:PRT1:TPI1:orf19.7104:RBE1:INO1:CHT3:XYL2:PGA14	9986:46658:22627:15:131:43187:5938:9897:10494:32160:324:30686:5737:30428:22626:45121:144:30446:5829:5783:33101:5628:329:5621:5940:5635:1400:71541:31105:5935:30445:5832:43614:16020:5634:32168:5576:5619:5886:16282:5622:9277:32040:71540:5844:5739:1411
32155	cell division site part	17 out of 630 genes, 2.7%	44 out of 5259 background genes, 0.8%	0.00179	0	CDC3:DBF2:TUB4:MLC1:INN1:CDC12:SEP7:CDC14:INT1:ACT1:HOF1:orf19.6240:MYO1:TPM2:CRN1:IQG1:GIN4	9986:30864:51286:31560:44697:31982:812:131:5938:778:32160:16460:35267:15629:35838:44732:5874:5884:31521:30428:9514:144:928:5829:30479:5730:30869:5628:5816:5826:923:5940:43332:1400:32432:31011:31105:5935:32178:71341:5634:32168:5885:30139:5619:142:31097:31561:5933:5824:34973:5822:1411
5576	extracellular region	29 out of 630 genes, 4.6%	103 out of 5259 background genes, 2.0%	0.002	0	ACS2:RBT1:TEF1:TOS1:KAR2:SPE3:MET6:RPS1:ENG1:UBI3:YWP1:PHR1:SCW11:CHT2:ENO1:YNK1:RPS5:TAL1:RPL17B:orf19.4502:IDP1:GCN1:GSP1:MEU1:RPS18:PUP2:RBE1:CHT3:PET9	9986:46658:22627:15:34515:43187:5794:19773:31965:324:30686:5839:30428:22626:45121:34099:30446:5829:5783:33101:5730:42645:5621:22625:5840:5635:228:5935:30445:16020:5634:5576:5886:5622:5777:5743:9277:5758:5739
5739	mitochondrion	153 out of 630 genes, 24.3%	934 out of 5259 background genes, 17.8%	0.00219	0	SSA2:VRG4:VAS1:orf19.1356:TEF1:TIM17:RAD50:TOM6:MDM10:LSC2:orf19.1967:ATP18:orf19.2275:CDC48:MIS11:CCP1:orf19.2382:orf19.2438:RIM1:orf19.2520:MGE1:LYS12:orf19.2639:orf19.2650.1:QCR9:RPL28:CBF1:MET13:orf19.3035:LSP1:orf19.3185:orf19.3205:CPA2:ATP3:TMA19:HTA3:MRS7:orf19.3357:LSC1:orf19.3367:FMP27:RPL23A:MRPL10:ATP4:TIF4631:ERG9:PGK1:orf19.3686:orf19.3755:ATP20:ARG8:orf19.3782.2:orf19.3797:LYS4:PGI1…	276:9986:5744:36286:51286:70210:5759:32153:22627:46695:36266:5960:32865:15:812:5789:31415:30874:34098:776:5761:124:5794:31305:9897:10494:5741:324:5762:5756:786:44732:1401:5737:31934:22626:97002:5962:5742:34990:30446:30061:5829:5783:31304:5747:5730:42721:5763:42645:31966:329:5750:22625:9898:44284:5840:19867:932:275:43332:17102:42175:30176:31011:36362:228:42719:30445:5832:15935:30870:1990112:32126:…
30312	external encapsulating structure	31 out of 630 genes, 4.9%	115 out of 5259 background genes, 2.2%	0.00258	0	CDC3:SSA2:RBT1:TEF1:TOS1:MET6:RSR1:PGA59:PDC11:ENG1:CDC19:YWP1:DSE1:PGK1:PHR1:SCW11:CHT2:ENO1:CEF3:RPS6A:PGA6:HSP90:SAM2:PRT1:TPI1:orf19.7104:RBE1:INO1:CHT3:XYL2:PGA14	9986:46658:22627:15:131:43187:5938:9897:10494:32160:324:30686:5737:30428:22626:45121:144:30446:5829:5783:33101:5628:329:5621:5940:5635:1400:71541:31105:5935:30445:5832:43614:16020:5634:32168:5576:5619:5886:16282:5622:9277:32040:71540:5844:5739:1411
315	organellar large ribosomal subunit	16 out of 630 genes, 2.5%	41 out of 5259 background genes, 0.8%	0.00292	0	orf19.1967:orf19.2639:orf19.3205:orf19.3367:MRPL10:orf19.3755:orf19.3797:orf19.397:orf19.549:orf19.5684:orf19.585:MRPL8:orf19.6136:orf19.6565:orf19.7485:orf19.7675	5762:97002:30061:5829:5730:31966:5634:5743:16021
5762	mitochondrial large ribosomal subunit	16 out of 630 genes, 2.5%	41 out of 5259 background genes, 0.8%	0.00292	0	orf19.1967:orf19.2639:orf19.3205:orf19.3367:MRPL10:orf19.3755:orf19.3797:orf19.397:orf19.549:orf19.5684:orf19.585:MRPL8:orf19.6136:orf19.6565:orf19.7485:orf19.7675	5762:97002:30061:5829:5730:31966:5634:5743:16021
276	mitochondrial proton-transporting ATP synthase complex, coupling factor F(o)	7 out of 630 genes, 1.1%	9 out of 5259 background genes, 0.2%	0.00341	0	ATP18:ATP4:ATP20:ATP19:ATP5:ATP14:orf19.5660.1	276:5886:274
45263	proton-transporting ATP synthase complex, coupling factor F(o)	7 out of 630 genes, 1.1%	9 out of 5259 background genes, 0.2%	0.00341	0	ATP18:ATP4:ATP20:ATP19:ATP5:ATP14:orf19.5660.1	276:5886:274
5852	eukaryotic translation initiation factor 3 complex	7 out of 630 genes, 1.1%	9 out of 5259 background genes, 0.2%	0.00341	0	TIF34:NIP1:orf19.51:RPG1A:PRT1:orf19.6748:HCR1	131:10494:5829:71541:43614:5634:16282:9277:71540:5852:34399
44815	DNA packaging complex	10 out of 630 genes, 1.6%	18 out of 5259 background genes, 0.3%	0.00346	0	HTA2:orf19.1052:HHF1:HHT21:YCG1:RAP1:HHT2:HHF22:HTA3:CSE4	812:783:776:780:786:31934:5829:775:31298:31933:31011:31618:5634:43505:790:5727:788:5739:799
142	cellular bud neck contractile ring	9 out of 630 genes, 1.4%	15 out of 5259 background genes, 0.3%	0.00422	0	MLC1:INN1:INT1:ACT1:HOF1:orf19.6240:MYO1:TPM2:IQG1	9986:30864:51286:31560:44697:31982:812:131:16460:35267:15629:5884:31521:144:9514:5829:30479:5628:5816:5826:5940:32432:31011:5935:32178:71341:5634:142:31561:5933:1411
5826	actomyosin contractile ring	11 out of 630 genes, 1.7%	22 out of 5259 background genes, 0.4%	0.00466	0	MLC1:INN1:CDC14:INT1:ACT1:HOF1:orf19.6240:MYO1:TPM2:CRN1:IQG1	9986:30864:51286:31560:44697:31982:812:131:778:16460:35267:15629:35838:44732:5884:31521:30428:144:9514:5829:30479:5730:30869:5628:5816:5826:5940:32432:31011:5935:32178:71341:5634:5885:30139:31097:142:31561:5933:1411
70938	contractile ring	11 out of 630 genes, 1.7%	22 out of 5259 background genes, 0.4%	0.00466	0	MLC1:INN1:CDC14:INT1:ACT1:HOF1:orf19.6240:MYO1:TPM2:CRN1:IQG1	9986:30864:51286:31560:44697:31982:812:131:778:16460:35267:15629:35838:44732:5884:31521:30428:144:9514:5829:30479:5730:30869:5628:5816:5826:5940:32432:31011:5935:32178:71341:5634:5885:30139:31097:142:31561:5933:1411
30446	hyphal cell wall	16 out of 630 genes, 2.5%	46 out of 5259 background genes, 0.9%	0.0158	0	SSA2:RBT1:TEF1:TOS1:MET6:PDC11:CDC19:YWP1:PGK1:PHR1:ENO1:HSP90:SAM2:TPI1:INO1:XYL2	9986:46658:15:9897:324:5737:30428:45121:30446:5829:33101:329:5621:30445:5832:16020:5634:5576:5886:5622:9277:5844:5739

## Sheet: Gene deletions
Table Sc. Gene Ontology results forbiofilms from gene deletions compared to WT biofilm.
Legend:
GOID:	Gene Ontology ID as annotated in the Candida Genome Database (CGD) for C. parapsilosis
GO_term	Gene Ontology term associated to GOID
Results for ACE2 KO (upregulated genes)
GOID	GO_term	Cluster frequency	Background frequency	Corrected P-value	False discovery rate	Gene(s) annotated to the term	Directly Annotated GOID List
Biological Process
6826	iron ion transport	7 out of 245 genes, 2.9%	14 out of 5984 background genes, 0.2%	0.0003	0	CPAR2_210100:CPAR2_300620:CPAR2_401740:FRP1:CPAR2_602990:FET3:FTR1	44117:55114:6827:70627:6826:9405:1516:35690:15677:10106:33215:6897
34755	iron ion transmembrane transport	5 out of 245 genes, 2.0%	7 out of 5984 background genes, 0.1%	0.00141	0	CPAR2_210100:FRP1:CPAR2_602990:FET3:FTR1	44117:55114:6827:70627:9405:35690:1516:15677:33215:10106:6897
6827	high-affinity iron ion transport	5 out of 245 genes, 2.0%	7 out of 5984 background genes, 0.1%	0.00141	0	CPAR2_210100:FRP1:CPAR2_602990:FET3:FTR1	44117:55114:6827:70627:9405:35690:1516:15677:33215:10106:6897
41	transition metal ion transport	9 out of 245 genes, 3.7%	33 out of 5984 background genes, 0.6%	0.00295	0	CPAR2_205460:CPAR2_210100:CPAR2_300620:CPAR2_303120:CPAR2_401740:FRP1:CPAR2_602990:FET3:FTR1	44117:55114:70627:43324:6826:1516:15677:33215:6897:6827:60003:6879:34759:9405:35690:6878:6825:10106:34599
30150	protein import into mitochondrial matrix	7 out of 245 genes, 2.9%	22 out of 5984 background genes, 0.4%	0.01159	0.004	CPAR2_102810:CPAR2_104030:CPAR2_105820:CPAR2_106940:CPAR2_211560:CPAR2_700590:CPAR2_807690	6457:2:10892:7163:6616:34605:50821:9636:15833:6950:30150:42026:43335:70096
7005	mitochondrion organization	24 out of 245 genes, 9.8%	238 out of 5984 background genes, 4.0%	0.02207	0.0067	CPAR2_102810:CPAR2_104030:CPAR2_105820:CPAR2_106940:MTP1:CPAR2_202900:CPAR2_205840:CPAR2_208880:CPAR2_211560:CPAR2_213170:CPAR2_300510:CPAR2_400600:CPAR2_401760:CPAR2_500070:CPAR2_503120:CPAR2_503820:CPAR2_503970:CPAR2_600370:YHM2:CPAR2_700590:CPAR2_700780:MRPL4:CPAR2_801520:CPAR2_807690	6457:30001:2:33108:46337:10892:7163:2001246:36164:6616:34605:50821:9636:15833:45039:33615:32543:45040:6950:6843:30150:34551:15986:42026:32048:43335:70096:33617:15742:42407
6839	mitochondrial transport	11 out of 245 genes, 4.5%	69 out of 5984 background genes, 1.2%	0.06251	0.0086	CPAR2_102810:CPAR2_104030:CPAR2_105820:CPAR2_106940:CPAR2_205600:CPAR2_205840:CPAR2_211560:CPAR2_400600:YHM2:CPAR2_700590:CPAR2_807690	6457:2:10892:7163:6616:34605:50821:9636:15833:45039:45040:6950:6843:30150:42026:43335:70096:15742:6850
65002	intracellular protein transmembrane transport	11 out of 245 genes, 4.5%	72 out of 5984 background genes, 1.2%	0.09292	0.0075	CPAR2_102810:CPAR2_104030:CPAR2_105820:CPAR2_106940:CPAR2_205840:CPAR2_211560:CPAR2_400600:CPAR2_402360:CPAR2_700590:CPAR2_807690:CPAR2_808530	6457:2:10892:7163:6616:34605:50821:9636:15833:45039:45040:6950:31204:30150:42026:43335:70096
71806	protein transmembrane transport	11 out of 245 genes, 4.5%	72 out of 5984 background genes, 1.2%	0.09292	0.0067	CPAR2_102810:CPAR2_104030:CPAR2_105820:CPAR2_106940:CPAR2_205840:CPAR2_211560:CPAR2_400600:CPAR2_402360:CPAR2_700590:CPAR2_807690:CPAR2_808530	6457:2:10892:7163:6616:34605:50821:9636:15833:45039:45040:6950:31204:30150:42026:43335:70096
Molecular Function
5507	copper ion binding	6 out of 245 genes, 2.4%	16 out of 5984 background genes, 0.3%	0.00399	0	CPAR2_202900:CPAR2_205460:CPAR2_303120:CPAR2_401730:CPAR2_603590:FET3	5507:166:4322:19829:16531:16491
16722	oxidoreductase activity, oxidizing metal ions	4 out of 245 genes, 1.6%	9 out of 5984 background genes, 0.2%	0.04669	0.09	CPAR2_300620:CPAR2_401740:FRP1:FET3	5507:4322:8823:293
Cellular Component
5743	mitochondrial inner membrane	21 out of 245 genes, 8.6%	158 out of 5984 background genes, 2.6%	0.00024	0	CPAR2_102810:CPAR2_104030:CPAR2_105820:CPAR2_200870:CPAR2_205600:CPAR2_206680:CPAR2_209870:CPAR2_209880:CPAR2_213170:CPAR2_303330:CPAR2_400600:CPAR2_401730:CPAR2_401760:CPAR2_500070:CPAR2_503820:CPAR2_600210:CPAR2_600370:CPAR2_700590:CPAR2_700780:CPAR2_800850:CPAR2_805860	1405:44284:276:5829:5758:5744:42653:31966:275:5886:5743:31305:42719:5634:31314:5751:42721:5761
5740	mitochondrial envelope	31 out of 245 genes, 12.7%	305 out of 5984 background genes, 5.1%	0.00032	0.01	CPAR2_100440:CPAR2_102810:CPAR2_104030:CPAR2_105820:CPAR2_108460:CPAR2_200870:CPAR2_202900:CPAR2_205600:CPAR2_205840:CPAR2_206680:CPAR2_209870:CPAR2_209880:CPAR2_213170:CPAR2_303330:CPAR2_400600:CPAR2_401730:CPAR2_401760:CPAR2_500070:CPAR2_502270:CPAR2_503120:CPAR2_503820:CPAR2_600210:CPAR2_600370:CPAR2_700590:CPAR2_700780:CPAR2_702000:CPAR2_702500:CPAR2_800850:CPAR2_801770:CPAR2_805860:CPAR2_807…	1405:44284:276:5829:5744:5758:5739:42653:31966:214:329:275:16021:5759:5886:5743:31305:42719:5740:5634:5742:5751:31314:42721:5741:5761:31307
44429	mitochondrial part	39 out of 245 genes, 15.9%	435 out of 5984 background genes, 7.3%	0.00033	0.0067	CPAR2_100440:CPAR2_102810:CPAR2_104030:CPAR2_105820:MTP1:CPAR2_108460:CPAR2_200870:CPAR2_202900:CPAR2_203600:CPAR2_205600:CPAR2_205840:CPAR2_206680:CPAR2_209870:CPAR2_209880:CPAR2_211560:CPAR2_213170:CPAR2_302710:CPAR2_303330:CPAR2_400600:CPAR2_401730:CPAR2_401760:CPAR2_500070:CPAR2_502270:CPAR2_503120:CPAR2_503820:CPAR2_503970:CPAR2_600210:CPAR2_600370:CPAR2_601520:YHM2:CPAR2_700590:CPAR2_700780…	1405:44284:276:5829:5744:5758:5739:42645:42653:31966:214:5762:329:275:16021:5759:5886:5743:31305:42719:5740:5634:5742:5751:31314:42721:5741:5761:31307
19866	organelle inner membrane	21 out of 245 genes, 8.6%	165 out of 5984 background genes, 2.8%	0.0005	0.015	CPAR2_102810:CPAR2_104030:CPAR2_105820:CPAR2_200870:CPAR2_205600:CPAR2_206680:CPAR2_209870:CPAR2_209880:CPAR2_213170:CPAR2_303330:CPAR2_400600:CPAR2_401730:CPAR2_401760:CPAR2_500070:CPAR2_503820:CPAR2_600210:CPAR2_600370:CPAR2_700590:CPAR2_700780:CPAR2_800850:CPAR2_805860	1405:44284:276:5829:5758:5744:42653:31966:275:5886:5743:31305:42719:5634:5751:31314:42721:5761
44455	mitochondrial membrane part	18 out of 245 genes, 7.3%	137 out of 5984 background genes, 2.3%	0.0017	0.02	CPAR2_102810:CPAR2_104030:CPAR2_105820:CPAR2_200870:CPAR2_205840:CPAR2_206680:CPAR2_209870:CPAR2_209880:CPAR2_213170:CPAR2_400600:CPAR2_401760:CPAR2_500070:CPAR2_503820:CPAR2_600210:CPAR2_600370:CPAR2_700590:CPAR2_700780:CPAR2_807690	1405:44284:276:5829:5758:5744:42653:275:5886:31305:42719:5634:5742:5751:31314:42721:31307
31966	mitochondrial membrane	26 out of 245 genes, 10.6%	260 out of 5984 background genes, 4.3%	0.00311	0.02	CPAR2_102810:CPAR2_104030:CPAR2_105820:CPAR2_200870:CPAR2_205600:CPAR2_205840:CPAR2_206680:CPAR2_209870:CPAR2_209880:CPAR2_213170:CPAR2_303330:CPAR2_400600:CPAR2_401730:CPAR2_401760:CPAR2_500070:CPAR2_502270:CPAR2_503820:CPAR2_600210:CPAR2_600370:CPAR2_700590:CPAR2_700780:CPAR2_702500:CPAR2_800850:CPAR2_801770:CPAR2_805860:CPAR2_807690	1405:44284:276:5829:5758:5744:42653:31966:214:275:5886:5743:31305:42719:5634:5742:5751:31314:42721:5741:5761:31307
5758	mitochondrial intermembrane space	10 out of 245 genes, 4.1%	55 out of 5984 background genes, 0.9%	0.01082	0.0229	CPAR2_100440:CPAR2_200870:CPAR2_202900:CPAR2_400600:CPAR2_401730:CPAR2_500070:CPAR2_503120:CPAR2_503820:CPAR2_600370:CPAR2_702000	5829:5758:329:5759:5886:5743:31305:42719:5634:5751:31314:42721:5761
31970	organelle envelope lumen	10 out of 245 genes, 4.1%	60 out of 5984 background genes, 1.0%	0.0233	0.02	CPAR2_100440:CPAR2_200870:CPAR2_202900:CPAR2_400600:CPAR2_401730:CPAR2_500070:CPAR2_503120:CPAR2_503820:CPAR2_600370:CPAR2_702000	5829:5758:329:5759:5886:5743:31305:42719:5634:5751:31314:42721:5761
5739	mitochondrion	60 out of 245 genes, 24.5%	943 out of 5984 background genes, 15.8%	0.03354	0.0178	CPAR2_100390:CPAR2_100440:SFC1:CPAR2_102810:CPAR2_102930:CPAR2_103450:CPAR2_104030:CPAR2_105820:CPAR2_106940:MTP1:CPAR2_108460:CPAR2_200870:CPAR2_201550:CPAR2_202900:CPAR2_203520:CPAR2_203530:CPAR2_203600:CPAR2_203880:CPAR2_205600:CPAR2_205840:CPAR2_206020:CPAR2_206680:CPAR2_208880:CPAR2_209870:CPAR2_209880:CPAR2_211560:CPAR2_213170:CPAR2_300510:CPAR2_302710:CPAR2_303330:CPAR2_400600:CPAR2_401730…	276:9986:5744:42645:31966:5762:16021:329:5759:5886:5844:42719:5742:5832:30445:30446:5761:31307:1405:44284:5829:5758:5739:5777:5783:5794:42653:214:275:5743:5960:31305:5740:5634:31314:5751:42721:5576:5741
31967	organelle envelope	33 out of 245 genes, 13.5%	440 out of 5984 background genes, 7.4%	0.07547	0.028	CPAR2_100440:CPAR2_102810:CPAR2_104030:CPAR2_105820:CPAR2_108240:CPAR2_108460:CPAR2_200870:CPAR2_202900:CPAR2_204330:CPAR2_205600:CPAR2_205840:CPAR2_206680:CPAR2_209870:CPAR2_209880:CPAR2_213170:CPAR2_303330:CPAR2_400600:CPAR2_401730:CPAR2_401760:CPAR2_500070:CPAR2_502270:CPAR2_503120:CPAR2_503820:CPAR2_600210:CPAR2_600370:CPAR2_700590:CPAR2_700780:CPAR2_702000:CPAR2_702500:CPAR2_800850:CPAR2_801…	276:9986:5744:31966:329:16021:5759:5886:72380:42719:5742:5761:31307:1405:44284:5829:5758:5739:5783:42653:214:5635:275:5743:31305:5643:5740:5634:5751:31314:42721:5741
31975	envelope	33 out of 245 genes, 13.5%	440 out of 5984 background genes, 7.4%	0.07547	0.0255	CPAR2_100440:CPAR2_102810:CPAR2_104030:CPAR2_105820:CPAR2_108240:CPAR2_108460:CPAR2_200870:CPAR2_202900:CPAR2_204330:CPAR2_205600:CPAR2_205840:CPAR2_206680:CPAR2_209870:CPAR2_209880:CPAR2_213170:CPAR2_303330:CPAR2_400600:CPAR2_401730:CPAR2_401760:CPAR2_500070:CPAR2_502270:CPAR2_503120:CPAR2_503820:CPAR2_600210:CPAR2_600370:CPAR2_700590:CPAR2_700780:CPAR2_702000:CPAR2_702500:CPAR2_800850:CPAR2_801…	276:9986:5744:31966:329:16021:5759:5886:72380:42719:5742:5761:31307:1405:44284:5829:5758:5739:5783:42653:214:5635:275:5743:31305:5643:5740:5634:5751:31314:42721:5741
Results for ACE2 KO (downregulated genes)
GOID	GO_term	Cluster frequency	Background frequency	Corrected P-value	False discovery rate	Gene(s) annotated to the term	Directly Annotated GOID List
Biological Process
No significant results
Molecular Function
4553	hydrolase activity, hydrolyzing O-glycosyl compounds	9 out of 170 genes, 5.3%	44 out of 5984 background genes, 0.7%	0.00035	0	CPAR2_101080:CPAR2_106500:CPAR2_108890:CPAR2_200660:CPAR2_407410:CPAR2_502120:CPAR2_502140:CPAR2_603090:CPAR2_800050	52861:4553:52862:4338:42973:30247:8843
16798	hydrolase activity, acting on glycosyl bonds	9 out of 170 genes, 5.3%	54 out of 5984 background genes, 0.9%	0.00207	0.01	CPAR2_101080:CPAR2_106500:CPAR2_108890:CPAR2_200660:CPAR2_407410:CPAR2_502120:CPAR2_502140:CPAR2_603090:CPAR2_800050	52861:4553:52862:4338:42973:30247:8843
Cellular Component
9986	cell surface	16 out of 170 genes, 9.4%	104 out of 5984 background genes, 1.7%	3.52e-06	0	CPAR2_108890:CPAR2_200660:CPAR2_205670:CPAR2_209240:CPAR2_302140:RBT1:CPAR2_406150:CPAR2_407410:CPAR2_501710:CPAR2_502140:CPAR2_502160:CPAR2_503650:CPAR2_603090:CPAR2_700650:CPAR2_801880:CPAR2_807880	5829:9986:5840:32040:5783:43187:46658:324:51286:33101:5635:5621:5886:5844:9277:5634:30428:22626:5935:30445:5576:30446:45121
5576	extracellular region	15 out of 170 genes, 8.8%	104 out of 5984 background genes, 1.7%	2.36e-05	0	CPAR2_108890:CPAR2_200660:CPAR2_207330:CPAR2_302140:DAG7:RBT1:CPAR2_404810:CPAR2_407410:CPAR2_502140:CPAR2_502160:CPAR2_503650:CPAR2_603090:CPAR2_700650:CPAR2_800050:CPAR2_801850	9986:5783:43187:46658:324:9514:33101:5635:5621:9277:30428:5935:30445:5576:45121:30446
30312	external encapsulating structure	15 out of 170 genes, 8.8%	105 out of 5984 background genes, 1.8%	2.69e-05	0	CPAR2_108890:CPAR2_200660:CPAR2_205670:CPAR2_209240:CPAR2_302140:RBT1:ALS3:CPAR2_407410:CPAR2_501710:CPAR2_502140:CPAR2_502160:CPAR2_503650:CPAR2_603090:CPAR2_603340:CPAR2_807880	5829:9986:5783:43187:46658:324:51286:33101:5635:5621:5886:5844:9277:5618:30428:22626:5935:30445:5576:45121:30446
5618	cell wall	15 out of 170 genes, 8.8%	105 out of 5984 background genes, 1.8%	2.69e-05	0	CPAR2_108890:CPAR2_200660:CPAR2_205670:CPAR2_209240:CPAR2_302140:RBT1:ALS3:CPAR2_407410:CPAR2_501710:CPAR2_502140:CPAR2_502160:CPAR2_503650:CPAR2_603090:CPAR2_603340:CPAR2_807880	5829:9986:5783:43187:46658:324:51286:33101:5635:5621:5886:5844:9277:5618:30428:22626:5935:30445:5576:45121:30446
9277	fungal-type cell wall	14 out of 170 genes, 8.2%	104 out of 5984 background genes, 1.7%	0.00014	0	CPAR2_108890:CPAR2_200660:CPAR2_205670:CPAR2_209240:CPAR2_302140:RBT1:CPAR2_407410:CPAR2_501710:CPAR2_502140:CPAR2_502160:CPAR2_503650:CPAR2_603090:CPAR2_603340:CPAR2_807880	5829:9986:5783:43187:46658:324:51286:33101:5635:5621:5886:5844:9277:30428:22626:5935:30445:5576:45121:30446
30445	yeast-form cell wall	7 out of 170 genes, 4.1%	35 out of 5984 background genes, 0.6%	0.00593	0	CPAR2_205670:CPAR2_209240:CPAR2_302140:CPAR2_407410:CPAR2_501710:CPAR2_502140:CPAR2_807880	9986:5829:5783:46658:51286:33101:5621:5886:5844:30428:22626:30445:5576:45121:30446
31298	replication fork protection complex	5 out of 170 genes, 2.9%	21 out of 5984 background genes, 0.4%	0.03214	0.0029	CPAR2_104750:CPAR2_104870:CPAR2_200330:CPAR2_202500:CPAR2_801440	5737:31298:5829:42555:5656:790:811:31261:784:97373
42555	MCM complex	3 out of 170 genes, 1.8%	6 out of 5984 background genes, 0.1%	0.05541	0.0025	CPAR2_104750:CPAR2_202500:CPAR2_801440	5737:31298:5829:42555:5656:790:31261:784:97373
43596	nuclear replication fork	6 out of 170 genes, 3.5%	37 out of 5984 background genes, 0.6%	0.0705	0.0067	CPAR2_104750:CPAR2_104870:CPAR2_200330:CPAR2_202500:CPAR2_208640:CPAR2_801440	5737:31298:5829:5658:42555:5635:5656:790:811:31261:784:97373
5875	microtubule associated complex	4 out of 170 genes, 2.4%	15 out of 5984 background genes, 0.3%	0.08798	0.006	CPAR2_202310:CPAR2_214070:CPAR2_405870:CPAR2_806610	5829:5739:5777:5938:5868:5869:5881:235:5816:5875:5643:5634:51285
Results for BCR1 KO (upregulated genes)
GOID	GO_term	Cluster frequency	Background frequency	Corrected P-value	False discovery rate	Gene(s) annotated to the term	Directly Annotated GOID List
Biological Process
6096	glycolytic process	10 out of 503 genes, 2.0%	15 out of 5984 background genes, 0.3%	4.26e-05	0	CPAR2_101070:CPAR2_204260:PGI1:CPAR2_206020:CPAR2_207210:CPAR2_209240:CPAR2_211810:PDA1:CPAR2_602950:CPAR2_807980	6096:19660:32889:30448:46323:36180:51701:6000:44409:51156:6013:44416:6002:48315:9267:71216:55114:1302:6094:7163:46015:6098:32445:6995:8361:15992:46835:15976:6086:36170:70317:51211:42867:6090
6334	nucleosome assembly	11 out of 503 genes, 2.2%	24 out of 5984 background genes, 0.4%	0.00155	0	CPAR2_102280:CPAR2_103280:CPAR2_105280:CPAR2_107020:CPAR2_201970:CPAR2_203210:CPAR2_203220:CPAR2_400110:CPAR2_501930:CPAR2_800400:CPAR2_808870	1900239:43486:70:7094:43935:6334:32968:70481:90055:6337:7117:90053:35066:6335:34729:30702:6348:30466:71168:7089:44030:51574:6306:16573:9303:87:6606:6336:30543:34080:6357:70829:43618:35067:70911:30437
71103	DNA conformation change	19 out of 503 genes, 3.8%	78 out of 5984 background genes, 1.3%	0.02079	0.0067	CPAR2_102280:CPAR2_103280:CPAR2_105280:CPAR2_107020:CPAR2_200310:CPAR2_201880:CPAR2_201970:CPAR2_203210:CPAR2_203220:CPAR2_213410:CPAR2_400110:CPAR2_404670:CPAR2_405020:CPAR2_406600:CPAR2_501050:CPAR2_501930:CPAR2_800400:CPAR2_801900:CPAR2_808870	43935:36178:7131:6279:32968:6270:90055:84:30491:6337:7004:35066:6333:6348:31055:722:6306:70058:8608:6310:9303:87:6336:712:34087:44774:34080:10032:6289:6915:724:6265:36244:19:30437:1900239:70:43486:7094:70550:6334:727:16567:6406:70481:7117:7076:6268:90053:45184:6335:30702:34729:30466:71168:7089:97046:9267:44030:6267:16573:51574:6302:6606:30543:30261:6271:36170:6357:42790:43618:70829:35067:70911:70…
6259	DNA metabolic process	53 out of 503 genes, 10.5%	366 out of 5984 background genes, 6.1%	0.0575	0.02	CPAR2_100170:CPAR2_101900:CPAR2_102110:CPAR2_102280:CPAR2_103280:CPAR2_105020:CPAR2_105280:CPAR2_106300:CPAR2_107020:CPAR2_107830:CPAR2_200310:CPAR2_201880:CPAR2_201970:CPAR2_202510:CPAR2_203210:CPAR2_203220:CPAR2_204230:CPAR2_205400:CPAR2_207880:CPAR2_207980:CPAR2_210870:CPAR2_211690:CPAR2_213340:CPAR2_213410:CPAR2_301580:CPAR2_302400:CPAR2_400110:CPAR2_401210:CPAR2_402830:CPAR2_404640:CPAR2_404…	43007:43936:32:6974:6261:36178:1900439:71163:6279:6352:36182:45944:6270:61408:90055:30447:84:30491:48478:6281:7004:6333:71931:722:1900560:6284:42766:6468:6306:8608:45461:30174:45899:34605:6336:2001165:34087:51573:44774:10032:2001209:724:36166:6265:36244:76:6301:1900239:6368:7094:44182:6334:2:727:6312:16567:6273:82:10964:70481:42276:42148:710:7076:90053:6307:6311:6355:70898:30702:90262:30466:71168…
65004	protein-DNA complex assembly	19 out of 503 genes, 3.8%	85 out of 5984 background genes, 1.4%	0.07549	0.02	CPAR2_102280:CPAR2_103280:CPAR2_105020:CPAR2_105280:CPAR2_107020:CPAR2_201880:CPAR2_201970:CPAR2_203210:CPAR2_203220:CPAR2_400110:CPAR2_402830:CPAR2_404670:CPAR2_501030:CPAR2_501930:CPAR2_701080:CPAR2_701640:CPAR2_703980:CPAR2_800400:CPAR2_808870	71163:6279:45944:6270:90055:84:6792:6338:6306:30174:71459:6336:90069:1900239:7094:6334:727:34508:7059:82:70481:90053:70898:30702:30466:71168:7089:44030:16573:6267:6606:51097:6271:1900375:35067:70911:33314:51123:43935:32968:31938:6337:35066:103:6348:1900478:6303:9303:87:34080:30437:6972:61427:43486:70:6110:45945:6369:7117:6268:6335:34729:61432:9086:51574:30543:6357:70829:43618:35690
Molecular Function
3735	structural constituent of ribosome	36 out of 503 genes, 7.2%	156 out of 5984 background genes, 2.6%	3.82e-06	0	CPAR2_100640:CPAR2_102840:CPAR2_105970:CPAR2_105980:CPAR2_107470:CPAR2_109170:CPAR2_202240:CPAR2_202550:CPAR2_203600:CPAR2_205880:CPAR2_206780:CPAR2_207320:CPAR2_208930:CPAR2_209360:CPAR2_209410:CPAR2_210540:CPAR2_211210:CPAR2_211390:CPAR2_302470:CPAR2_302710:CPAR2_303640:CPAR2_401430:CPAR2_405330:MNP1:CPAR2_503730:CPAR2_504170:CPAR2_602160:CPAR2_602580:MRPL4:CPAR2_701820:CPAR2_702160:CPAR2_70244…	166:3735:19843:3723:8097
5198	structural molecule activity	41 out of 503 genes, 8.2%	256 out of 5984 background genes, 4.3%	0.01067	0	CPAR2_100640:CPAR2_102840:CPAR2_103890:CPAR2_105970:CPAR2_105980:CPAR2_107470:CPAR2_109170:CPAR2_201580:CPAR2_201840:CPAR2_202240:CPAR2_202550:CPAR2_203600:CPAR2_205880:CPAR2_206530:CPAR2_206780:CPAR2_207320:CPAR2_208930:CPAR2_209360:CPAR2_209410:CPAR2_210540:CPAR2_211210:CPAR2_211390:CPAR2_302470:CPAR2_302710:CPAR2_303640:CPAR2_401430:CPAR2_405330:MNP1:CPAR2_503730:CPAR2_504170:CPAR2_602160:CPAR…	46961:3735:5198:19843:15450:978:17025:5200:166:1106:8017:3723:8097
Cellular Component
43596	nuclear replication fork	15 out of 503 genes, 3.0%	37 out of 5984 background genes, 0.6%	2.63e-05	0	CPAR2_100170:CPAR2_105020:CPAR2_107020:CPAR2_201880:CPAR2_205400:CPAR2_207980:CPAR2_210870:CPAR2_213340:CPAR2_213410:CPAR2_404670:CPAR2_406600:CPAR2_500980:CPAR2_501930:CPAR2_701640:CPAR2_803200	5737:31298:33186:5829:5739:5658:794:42555:5635:8623:35101:30875:5656:8622:790:786:31390:775:31261:5662:781:43596:97373
32993	protein-DNA complex	29 out of 503 genes, 5.8%	122 out of 5984 background genes, 2.0%	4.49e-05	0	CPAR2_100170:CPAR2_102280:CPAR2_103280:CPAR2_105020:CPAR2_107020:CPAR2_107180:CPAR2_201580:CPAR2_201880:CPAR2_203210:CPAR2_203220:CPAR2_205400:CPAR2_206530:CPAR2_210870:CPAR2_213340:CPAR2_213410:CPAR2_400110:CPAR2_402100:CPAR2_404670:CPAR2_405020:CPAR2_406600:CPAR2_500980:CPAR2_501030:CPAR2_501930:CPAR2_701080:CPAR2_701640:CPAR2_701780:CPAR2_800400:CPAR2_801420:CPAR2_808870	778:33186:812:43505:5654:5658:794:31011:42555:31618:780:35101:788:790:786:775:31261:72686:33597:5662:776:5737:31298:5829:5739:51233:5727:31933:30998:5635:8623:799:5656:30875:8622:5643:5819:31934:5634:42729:781:43596:97373
5657	replication fork	16 out of 503 genes, 3.2%	47 out of 5984 background genes, 0.8%	0.00016	0	CPAR2_100170:CPAR2_105020:CPAR2_107020:CPAR2_201880:CPAR2_205400:CPAR2_207980:CPAR2_210870:CPAR2_213340:CPAR2_213410:CPAR2_404670:CPAR2_406600:CPAR2_500980:CPAR2_501930:CPAR2_701640:CPAR2_800580:CPAR2_803200	5724:33186:5658:794:42555:35101:790:786:31390:775:31261:5662:5737:31298:5829:5739:5635:8623:30875:5656:8622:5657:781:43596:97373
9986	cell surface	25 out of 503 genes, 5.0%	104 out of 5984 background genes, 1.7%	0.00025	0	CPAR2_100700:CPAR2_102710:CPAR2_103450:CPAR2_105970:XOG1:CPAR2_107470:CPAR2_202600:CPAR2_203060:CPAR2_207210:CPAR2_208800:CPAR2_209240:CPAR2_211810:CPAR2_213080:CPAR2_400860:CPAR2_401740:RBT1:CPAR2_500920:PDC11:CPAR2_503730:CPAR2_602950:CPAR2_603590:CPAR2_806310:YWP1:CPAR2_807980:CPAR2_808670	9986:32040:46658:324:9514:42788:5886:5887:22625:5811:30686:30445:30446:5737:131:5829:5940:5758:142:5840:5739:5854:935:9277:5730:5634:15:9897:5576
5840	ribosome	44 out of 503 genes, 8.7%	249 out of 5984 background genes, 4.2%	0.00032	0	CPAR2_100640:CPAR2_102710:CPAR2_102840:CPAR2_104970:CPAR2_105970:CPAR2_105980:CPAR2_107470:CPAR2_109170:CPAR2_202240:CPAR2_202550:CPAR2_203600:CPAR2_205880:CPAR2_206690:CPAR2_206780:CPAR2_207320:CPAR2_208930:CPAR2_209360:CPAR2_209410:CPAR2_210540:CPAR2_211210:CPAR2_211390:CPAR2_302470:CPAR2_302710:CPAR2_303640:CPAR2_303850:CPAR2_401430:CPAR2_405330:MNP1:CPAR2_503730:CPAR2_504170:CPAR2_602160:CPAR…	5763:9986:32040:42645:5762:42788:22625:30686:22627:5761:5737:5829:5840:5739:5854:5730:5634:22626
44454	nuclear chromosome part	40 out of 503 genes, 8.0%	222 out of 5984 background genes, 3.7%	0.0006	0	CPAR2_100170:CPAR2_102110:CPAR2_102280:CPAR2_103280:CPAR2_105020:CPAR2_106300:CPAR2_107020:CPAR2_107180:CPAR2_200310:CPAR2_201580:CPAR2_201880:CPAR2_203220:CPAR2_205400:CPAR2_206530:CPAR2_207880:CPAR2_207900:CPAR2_207980:CPAR2_210870:CPAR2_213340:CPAR2_213410:CPAR2_300250:CPAR2_402100:CPAR2_404670:CPAR2_405020:CPAR2_406600:CPAR2_500980:CPAR2_501030:CPAR2_501050:CPAR2_501930:CPAR2_601290:CPAR2_700…	5724:778:33186:795:812:43505:5654:5658:794:31011:42555:97047:31618:780:798:35101:70210:788:790:786:31390:775:31261:72686:33597:44732:5935:5662:776:34990:5737:31298:5940:5829:33309:5739:30907:51233:31933:5727:5635:30998:8623:799:30875:5656:8622:5657:5819:5643:31934:5634:42729:70822:408:781:43596:97373
228	nuclear chromosome	42 out of 503 genes, 8.3%	244 out of 5984 background genes, 4.1%	0.00115	0	CPAR2_100170:CPAR2_102110:CPAR2_102280:CPAR2_103280:CPAR2_105020:CPAR2_106300:CPAR2_107020:CPAR2_107180:CPAR2_200310:CPAR2_201580:CPAR2_201880:CPAR2_202510:CPAR2_203220:CPAR2_205400:CPAR2_206530:CPAR2_207880:CPAR2_207900:CPAR2_207980:CPAR2_210870:CPAR2_213340:CPAR2_213410:CPAR2_300250:CPAR2_402100:CPAR2_404670:CPAR2_405020:CPAR2_406600:CPAR2_500160:CPAR2_500980:CPAR2_501030:CPAR2_501050:CPAR2_501…	5724:778:33186:795:812:43505:5654:5658:794:31011:42555:97047:31618:780:798:35101:70210:788:790:786:31390:775:228:31261:72686:33597:32301:44732:5935:5662:776:34990:5737:31298:5940:5829:33309:5739:30907:51233:31933:5727:5635:30998:8623:799:30875:5656:8622:5657:32302:5819:5643:31934:5634:42729:70822:408:781:43596:97373
44427	chromosomal part	46 out of 503 genes, 9.1%	282 out of 5984 background genes, 4.7%	0.00179	0	CPAR2_100170:CPAR2_102110:CPAR2_102280:CPAR2_103280:CPAR2_105020:CPAR2_106300:CPAR2_107020:CPAR2_107180:CPAR2_200310:CPAR2_201580:CPAR2_201880:CPAR2_203210:CPAR2_203220:CPAR2_205400:CPAR2_206530:CPAR2_207880:CPAR2_207900:CPAR2_207980:CPAR2_210870:CPAR2_213340:CPAR2_213410:CPAR2_300250:CPAR2_301580:CPAR2_400110:CPAR2_402100:CPAR2_404670:CPAR2_404760:CPAR2_405020:CPAR2_406600:CPAR2_500980:CPAR2_501…	5724:778:33186:795:812:43505:5654:5658:794:31011:42555:97047:31618:780:798:35101:35327:70210:788:790:786:775:31390:31261:72686:33597:44732:5935:5662:776:34990:16593:5737:31298:5940:5829:33309:5739:30907:51233:31933:5727:5635:30998:8623:799:30875:5656:8622:5657:5819:5643:31934:5634:42729:70822:408:30915:781:43596:97373
5694	chromosome	48 out of 503 genes, 9.5%	306 out of 5984 background genes, 5.1%	0.00335	0	CPAR2_100170:CPAR2_102110:CPAR2_102280:CPAR2_103280:CPAR2_105020:CPAR2_106300:CPAR2_107020:CPAR2_107180:CPAR2_200310:CPAR2_201580:CPAR2_201880:CPAR2_202510:CPAR2_203210:CPAR2_203220:CPAR2_205400:CPAR2_206530:CPAR2_207880:CPAR2_207900:CPAR2_207980:CPAR2_210870:CPAR2_213340:CPAR2_213410:CPAR2_300250:CPAR2_301580:CPAR2_400110:CPAR2_402100:CPAR2_404670:CPAR2_404760:CPAR2_405020:CPAR2_406600:CPAR2_500…	5724:778:33186:43505:5654:5658:97047:780:798:70210:790:786:775:31261:33597:44732:5662:16593:5737:31298:5940:51233:31933:5727:5635:8623:8622:31934:42729:30915:43596:812:795:31011:794:42555:31618:35101:788:35327:31390:228:72686:32301:5935:776:34990:5829:33309:5739:30907:30998:5656:30875:799:32302:5657:5643:5819:5634:408:70822:781:97373
1990104	DNA bending complex	7 out of 503 genes, 1.4%	12 out of 5984 background genes, 0.2%	0.00412	0	CPAR2_102280:CPAR2_103280:CPAR2_107020:CPAR2_203210:CPAR2_203220:CPAR2_800400:CPAR2_808870	43505:780:786:31298:31933:5727:31934:812:31011:31618:788:776:5829:5739:5634
786	nucleosome	7 out of 503 genes, 1.4%	12 out of 5984 background genes, 0.2%	0.00412	0	CPAR2_102280:CPAR2_103280:CPAR2_107020:CPAR2_203210:CPAR2_203220:CPAR2_800400:CPAR2_808870	43505:780:786:31298:31933:5727:31934:812:31011:31618:788:776:5829:5739:5634
9277	fungal-type cell wall	22 out of 503 genes, 4.4%	104 out of 5984 background genes, 1.7%	0.01021	0	SAPP1:CPAR2_103450:XOG1:KRE1:CPAR2_207210:CPAR2_209240:CPAR2_211810:CPAR2_213080:CPAR2_213670:CPAR2_302620:CPAR2_400860:CPAR2_402920:RBT1:CPAR2_406820:CPAR2_500920:PDC11:CPAR2_602950:WSC1:CPAR2_806310:YWP1:CPAR2_807980:CPAR2_808670	9986:46658:324:5886:5737:935:9277:15:9514:5811:30445:30446:131:5829:5758:5739:5783:16020:5634:9897:5576
30312	external encapsulating structure	22 out of 503 genes, 4.4%	105 out of 5984 background genes, 1.8%	0.01192	0	SAPP1:CPAR2_103450:XOG1:KRE1:CPAR2_207210:CPAR2_209240:CPAR2_211810:CPAR2_213080:CPAR2_213670:CPAR2_302620:CPAR2_400860:CPAR2_402920:RBT1:CPAR2_406820:CPAR2_500920:PDC11:CPAR2_602950:WSC1:CPAR2_806310:YWP1:CPAR2_807980:CPAR2_808670	9986:46658:324:5886:5737:935:9277:15:9514:5811:30445:30446:131:5829:5758:5739:5783:16020:5634:9897:5576
5618	cell wall	22 out of 503 genes, 4.4%	105 out of 5984 background genes, 1.8%	0.01192	0	SAPP1:CPAR2_103450:XOG1:KRE1:CPAR2_207210:CPAR2_209240:CPAR2_211810:CPAR2_213080:CPAR2_213670:CPAR2_302620:CPAR2_400860:CPAR2_402920:RBT1:CPAR2_406820:CPAR2_500920:PDC11:CPAR2_602950:WSC1:CPAR2_806310:YWP1:CPAR2_807980:CPAR2_808670	9986:46658:324:5886:5737:935:9277:15:9514:5811:30445:30446:131:5829:5758:5739:5783:16020:5634:9897:5576
794	condensed nuclear chromosome	17 out of 503 genes, 3.4%	70 out of 5984 background genes, 1.2%	0.01244	0	CPAR2_102110:CPAR2_102280:CPAR2_107180:CPAR2_200310:CPAR2_201580:CPAR2_202510:CPAR2_206530:CPAR2_207880:CPAR2_213410:CPAR2_402100:CPAR2_405020:CPAR2_406600:CPAR2_501050:CPAR2_700560:CPAR2_701780:CPAR2_801420:CPAR2_801900	778:43505:5654:97047:780:798:775:33597:44732:5662:5737:5940:51233:5727:5635:42729:795:794:788:72686:5935:776:34990:5829:5739:30998:799:5819:5643:5634:781
44815	DNA packaging complex	8 out of 503 genes, 1.6%	18 out of 5984 background genes, 0.3%	0.01286	0	CPAR2_102280:CPAR2_103280:CPAR2_107020:CPAR2_203210:CPAR2_203220:CPAR2_405020:CPAR2_800400:CPAR2_808870	43505:780:786:31298:31933:5727:31934:812:31011:31618:788:776:5829:5739:799:5634
34990	nuclear mitotic cohesin complex	4 out of 503 genes, 0.8%	4 out of 5984 background genes, 0.1%	0.01313	0	CPAR2_102110:CPAR2_200310:CPAR2_700560:CPAR2_801900	798:34990:5829:5739
30446	hyphal cell wall	13 out of 503 genes, 2.6%	46 out of 5984 background genes, 0.8%	0.01818	0	CPAR2_207210:CPAR2_209240:CPAR2_211810:CPAR2_213080:CPAR2_400860:RBT1:CPAR2_406820:PDC11:CPAR2_602950:CPAR2_806310:YWP1:CPAR2_807980:CPAR2_808670	9986:46658:324:5886:5737:15:9514:5811:30445:30446:131:5829:5758:5739:5634:9897:5576
793	condensed chromosome	18 out of 503 genes, 3.6%	79 out of 5984 background genes, 1.3%	0.01858	0	CPAR2_102110:CPAR2_102280:CPAR2_107180:CPAR2_200310:CPAR2_201580:CPAR2_202510:CPAR2_206530:CPAR2_207880:CPAR2_213410:CPAR2_402100:CPAR2_404760:CPAR2_405020:CPAR2_406600:CPAR2_501050:CPAR2_700560:CPAR2_701780:CPAR2_801420:CPAR2_801900	778:43505:5654:97047:780:798:775:33597:44732:5662:5737:5940:51233:5727:5635:42729:30915:795:794:788:72686:5935:776:34990:5829:5739:30998:799:5819:5643:5634:781
22626	cytosolic ribosome	16 out of 503 genes, 3.2%	67 out of 5984 background genes, 1.1%	0.02577	0	CPAR2_102840:CPAR2_107470:CPAR2_109170:CPAR2_202240:CPAR2_205880:CPAR2_206690:CPAR2_206780:CPAR2_209360:CPAR2_209410:CPAR2_211390:CPAR2_602580:CPAR2_602960:CPAR2_701820:CPAR2_803410:CPAR2_805740:CPAR2_808930	9986:22625:22627:22626:5739:5730:5634
44445	cytosolic part	23 out of 503 genes, 4.6%	118 out of 5984 background genes, 2.0%	0.02638	0	CPAR2_101070:CPAR2_102840:CPAR2_107470:CPAR2_109170:CPAR2_202240:CPAR2_205880:CPAR2_206690:CPAR2_206780:CPAR2_207210:CPAR2_209360:CPAR2_209410:CPAR2_210030:CPAR2_210450:CPAR2_211390:CPAR2_401000:CPAR2_404530:CPAR2_602580:CPAR2_602960:CPAR2_701820:CPAR2_803410:CPAR2_805570:CPAR2_805740:CPAR2_808930	9986:19773:324:5886:5945:22625:22627:8541:2144:15:22626:34515:72380:5832:30445:30446:5739:5730:5634:5576
30894	replisome	7 out of 503 genes, 1.4%	15 out of 5984 background genes, 0.3%	0.02678	0	CPAR2_100170:CPAR2_205400:CPAR2_210870:CPAR2_213340:CPAR2_213410:CPAR2_406600:CPAR2_500980	5658:790:5662:31298:5635:8623:8622:794:35101:5829:781
43601	nuclear replisome	7 out of 503 genes, 1.4%	15 out of 5984 background genes, 0.3%	0.02678	0	CPAR2_100170:CPAR2_205400:CPAR2_210870:CPAR2_213340:CPAR2_213410:CPAR2_406600:CPAR2_500980	5658:790:5662:31298:5635:8623:8622:794:35101:5829:781
43228	non-membrane-bounded organelle	116 out of 503 genes, 23.1%	1015 out of 5984 background genes, 17.0%	0.03921	0	CPAR2_100170:CPAR2_100610:CPAR2_100640:CPAR2_100700:CPAR2_102110:CPAR2_102280:CPAR2_102710:CPAR2_102840:CPAR2_103280:CPAR2_103500:CPAR2_104970:CPAR2_105020:CPAR2_105570:CPAR2_105970:CPAR2_105980:CPAR2_106300:CPAR2_107020:CPAR2_107180:CPAR2_107470:CPAR2_109170:CPAR2_200310:CPAR2_201580:CPAR2_201880:CPAR2_202240:CPAR2_202510:CPAR2_202550:CPAR2_203210:CPAR2_203220:CPAR2_203600:CPAR2_204030:CPAR2_205…	5666:5724:5763:778:33186:5655:9986:43505:5654:5658:42645:97047:5762:780:798:329:5967:42788:5826:16460:70210:5886:790:786:775:31261:33597:5887:22625:44732:243:30686:5662:22627:31560:16593:5737:31298:5940:142:5840:5736:51233:31933:5727:31561:5854:31521:5635:8623:8622:31934:31982:5665:42729:22626:30915:43332:5751:43596:795:812:32040:32432:794:31011:42555:9514:31618:16021:35101:30687:35327:788:228:31…
43232	intracellular non-membrane-bounded organelle	116 out of 503 genes, 23.1%	1015 out of 5984 background genes, 17.0%	0.03921	0	CPAR2_100170:CPAR2_100610:CPAR2_100640:CPAR2_100700:CPAR2_102110:CPAR2_102280:CPAR2_102710:CPAR2_102840:CPAR2_103280:CPAR2_103500:CPAR2_104970:CPAR2_105020:CPAR2_105570:CPAR2_105970:CPAR2_105980:CPAR2_106300:CPAR2_107020:CPAR2_107180:CPAR2_107470:CPAR2_109170:CPAR2_200310:CPAR2_201580:CPAR2_201880:CPAR2_202240:CPAR2_202510:CPAR2_202550:CPAR2_203210:CPAR2_203220:CPAR2_203600:CPAR2_204030:CPAR2_205…	5666:5724:5763:778:33186:5655:9986:43505:5654:5658:42645:97047:5762:780:798:329:5967:42788:5826:16460:70210:5886:790:786:775:31261:33597:5887:22625:44732:243:30686:5662:22627:31560:16593:5737:31298:5940:142:5840:5736:51233:31933:5727:31561:5854:31521:5635:8623:8622:31934:31982:5665:42729:22626:30915:43332:5751:43596:795:812:32040:32432:794:31011:42555:9514:31618:16021:35101:30687:35327:788:228:31…
30892	mitotic cohesin complex	4 out of 503 genes, 0.8%	5 out of 5984 background genes, 0.1%	0.06129	0	CPAR2_102110:CPAR2_200310:CPAR2_700560:CPAR2_801900	798:34990:5829:5739
798	nuclear cohesin complex	4 out of 503 genes, 0.8%	5 out of 5984 background genes, 0.1%	0.06129	0	CPAR2_102110:CPAR2_200310:CPAR2_700560:CPAR2_801900	798:34990:5829:5739
8278	cohesin complex	4 out of 503 genes, 0.8%	5 out of 5984 background genes, 0.1%	0.06129	0	CPAR2_102110:CPAR2_200310:CPAR2_700560:CPAR2_801900	798:34990:5829:5739
31970	organelle envelope lumen	14 out of 503 genes, 2.8%	60 out of 5984 background genes, 1.0%	0.09054	0.0007	CPAR2_100440:CPAR2_101340:CPAR2_101390:CPAR2_200610:CPAR2_202900:CPAR2_211810:CPAR2_400600:CPAR2_500070:CPAR2_503120:CPAR2_503820:CPAR2_600370:CPAR2_700340:CPAR2_702000:CPAR2_807840	9986:329:5759:5886:5641:5737:5751:31314:42719:30446:5829:5758:31305:5634:42721:5576
Results for BCR1 KO (downregulated genes)
GOID	GO_term	Cluster frequency	Background frequency	Corrected P-value	False discovery rate	Gene(s) annotated to the term	Directly Annotated GOID List
Biological Process
16054	organic acid catabolic process	25 out of 392 genes, 6.4%	67 out of 5984 background genes, 1.1%	1.34e-10	0	CPAR2_100820:CPAR2_101230:CPAR2_104190:CPAR2_108570:CPAR2_110400:CPAR2_200790:CPAR2_203160:CPAR2_203270:CPAR2_205500:CPAR2_206730:CPAR2_211040:CPAR2_401300:CPAR2_402700:CPAR2_402710:CPAR2_404100:CPAR2_405810:CPAR2_501570:CPAR2_503040:CPAR2_701650:CPAR2_800020:MLS1:CPAR2_807600:CPAR2_807700:CPAR2_807710:CPAR2_807720	44117:16560:45333:90368:30448:70784:6543:9437:6635:19740:1080:42760:6523:6527:45944:19626:30447:6084:9450:55085:19631:6351:42758:6524:6591:6207:6097:55114:44011:6559:16573:6537:9062:70409:45733:9074:15867:45984:19547:6807:10133:7031:6066:6541:6552:950:951:70783:19551:19427:19654:42318:15976:6569:949:9405:6085:35690:1300
46395	carboxylic acid catabolic process	25 out of 392 genes, 6.4%	67 out of 5984 background genes, 1.1%	1.34e-10	0	CPAR2_100820:CPAR2_101230:CPAR2_104190:CPAR2_108570:CPAR2_110400:CPAR2_200790:CPAR2_203160:CPAR2_203270:CPAR2_205500:CPAR2_206730:CPAR2_211040:CPAR2_401300:CPAR2_402700:CPAR2_402710:CPAR2_404100:CPAR2_405810:CPAR2_501570:CPAR2_503040:CPAR2_701650:CPAR2_800020:MLS1:CPAR2_807600:CPAR2_807700:CPAR2_807710:CPAR2_807720	44117:16560:45333:90368:30448:70784:6543:9437:6635:19740:1080:42760:6523:6527:45944:19626:30447:6084:9450:55085:19631:6351:42758:6524:6591:6207:6097:55114:44011:6559:16573:6537:9062:70409:45733:9074:15867:45984:19547:6807:10133:7031:6541:6066:951:950:6552:70783:19551:19427:19654:42318:15976:6569:949:9405:6085:35690:1300
72329	monocarboxylic acid catabolic process	17 out of 392 genes, 4.3%	32 out of 5984 background genes, 0.5%	1.04e-09	0	CPAR2_110400:CPAR2_200790:CPAR2_205500:CPAR2_206730:CPAR2_211040:CPAR2_401300:CPAR2_402710:CPAR2_405810:CPAR2_501570:CPAR2_503040:CPAR2_701650:CPAR2_800020:MLS1:CPAR2_807600:CPAR2_807700:CPAR2_807710:CPAR2_807720	44117:16560:45333:70784:9437:6635:19740:1080:42760:45944:19626:30447:6084:9450:55085:19631:6351:42758:6097:44011:16573:9062:45733:15867:7031:6066:70783:19427:19654:42318:15976:9405:6085
44282	small molecule catabolic process	26 out of 392 genes, 6.6%	82 out of 5984 background genes, 1.4%	3.48e-09	0	CPAR2_100820:CPAR2_101230:CPAR2_104190:CPAR2_108570:CPAR2_110400:CPAR2_200790:CPAR2_203160:CPAR2_203270:CPAR2_205500:CPAR2_206730:CPAR2_211040:CPAR2_401300:CPAR2_402700:CPAR2_402710:CPAR2_404100:CPAR2_405810:CPAR2_501570:CPAR2_503040:CPAR2_603350:CPAR2_701650:CPAR2_800020:MLS1:CPAR2_807600:CPAR2_807700:CPAR2_807710:CPAR2_807720	44117:16560:45333:90368:30448:70784:6543:9437:6635:19740:1080:42760:6523:6527:45944:19626:30447:6084:9450:55085:19631:6351:42758:19571:6524:6591:6207:6097:55114:44011:6559:16573:6537:9062:70409:45733:9074:15867:45984:19547:6807:10133:7031:6541:6066:951:950:6552:70783:19551:19427:19654:42318:15976:6569:949:9405:6085:35690:19528:1300
19395	fatty acid oxidation	11 out of 392 genes, 2.8%	14 out of 5984 background genes, 0.2%	2.15e-08	0	CPAR2_204220:CPAR2_205500:CPAR2_206730:CPAR2_401300:CPAR2_402710:CPAR2_503040:CPAR2_800020:CPAR2_807600:CPAR2_807700:CPAR2_807710:CPAR2_807720	16560:45333:9437:6635:42760:30447:6084:48252:42758:6097:44011:45733:10430:15867:7031:42318:15976:9405
34440	lipid oxidation	11 out of 392 genes, 2.8%	14 out of 5984 background genes, 0.2%	2.15e-08	0	CPAR2_204220:CPAR2_205500:CPAR2_206730:CPAR2_401300:CPAR2_402710:CPAR2_503040:CPAR2_800020:CPAR2_807600:CPAR2_807700:CPAR2_807710:CPAR2_807720	16560:45333:9437:6635:42760:30447:6084:48252:42758:6097:44011:45733:10430:15867:7031:42318:15976:9405
9062	fatty acid catabolic process	12 out of 392 genes, 3.1%	18 out of 5984 background genes, 0.3%	5.85e-08	0	CPAR2_205500:CPAR2_206730:CPAR2_401300:CPAR2_402710:CPAR2_501570:CPAR2_503040:CPAR2_800020:MLS1:CPAR2_807600:CPAR2_807700:CPAR2_807710:CPAR2_807720	16560:45333:70784:9437:6635:42760:45944:19626:30447:6084:6351:42758:6097:44011:9062:45733:15867:7031:70783:42318:15976:9405
6635	fatty acid beta-oxidation	10 out of 392 genes, 2.6%	12 out of 5984 background genes, 0.2%	6.5e-08	0	CPAR2_205500:CPAR2_206730:CPAR2_401300:CPAR2_402710:CPAR2_503040:CPAR2_800020:CPAR2_807600:CPAR2_807700:CPAR2_807710:CPAR2_807720	16560:45333:9437:6635:42760:30447:6084:42758:6097:44011:45733:15867:7031:42318:15976:9405
32787	monocarboxylic acid metabolic process	26 out of 392 genes, 6.6%	107 out of 5984 background genes, 1.8%	2.38e-06	0	CPAR2_102550:CPAR2_103260:CPAR2_110400:CPAR2_200640:CPAR2_200790:CPAR2_201500:CPAR2_203980:CPAR2_204220:CPAR2_205500:CPAR2_206730:CPAR2_211040:ALD5:CPAR2_300930:CPAR2_401300:CPAR2_402710:CPAR2_405810:CPAR2_501570:CPAR2_502590:CPAR2_503040:CPAR2_701650:CPAR2_800020:MLS1:CPAR2_807600:CPAR2_807700:CPAR2_807710:CPAR2_807720	44117:16560:45333:1676:1410:44182:36178:70784:9437:36180:6635:19740:1080:42760:45944:35336:44409:19626:30447:6084:6631:48252:9450:16562:55085:19631:1900198:6351:42758:6097:55114:71216:16485:44011:16573:6089:9062:45733:71467:10430:52002:15867:7031:45329:15909:6066:70783:19413:19427:19654:42318:15976:6508:9405:6085:36244:44410
44712	single-organism catabolic process	43 out of 392 genes, 11.0%	268 out of 5984 background genes, 4.5%	1.89e-05	0	CPAR2_100370:CPAR2_100810:CPAR2_100820:CPAR2_101230:CPAR2_101350:CPAR2_104190:CPAR2_104990:GAL1:GAL10:GAL7:CPAR2_108570:CPAR2_110400:CPAR2_200790:CPAR2_203160:CPAR2_203270:CPAR2_205500:CPAR2_206730:CPAR2_211040:CPAR2_301460:CPAR2_400770:CPAR2_401300:CPAR2_402700:CPAR2_402710:CPAR2_404100:CPAR2_404300:CPAR2_405810:CPAR2_407360:CPAR2_501570:CPAR2_503040:CPAR2_601180:CPAR2_601350:CPAR2_603350:CPAR2_…	1900182:31137:1900439:1900445:6543:9437:97308:43709:3400:19740:7329:42760:45944:6147:19626:30447:6084:55085:48315:9409:9272:75306:30818:6559:9074:34605:15867:45984:34356:6995:34497:6807:10133:6541:44413:71333:15976:36166:9847:1300:43161:44406:19358:90368:44182:19933:6071:1080:71470:6527:6184:9450:19631:6351:42758:42843:32258:34599:44011:16573:60257:30242:6098:1901027:19547:7031:950:70783:10514:46…
55085	transmembrane transport	55 out of 392 genes, 14.0%	408 out of 5984 background genes, 6.8%	9.94e-05	0	CPAR2_100100:TNA1:CPAR2_100330:CPAR2_100470:CPAR2_100560:CPAR2_101860:CPAR2_102760:CPAR2_104450:CPAR2_106680:CPAR2_106690:CPAR2_106700:CPAR2_108340:CPAR2_108370:CPAR2_108710:CPAR2_200830:CPAR2_202850:CPAR2_203890:CPAR2_210080:CPAR2_210610:CPAR2_300520:CPAR2_300770:CPAR2_300930:CPAR2_301390:CPAR2_301640:HIP1:CPAR2_400160:CPAR2_400230:CPAR2_400790:CPAR2_401360:CPAR2_401450:CPAR2_402040:CPAR2_402410…	15798:36178:19740:33215:6821:6849:55085:6847:34605:15812:97080:6827:15810:36244:15758:44182:45916:16562:31204:15824:19631:34258:46618:34599:6986:1902269:15809:3333:747:44271:45332:6513:70778:6635:35879:15813:6631:15903:10106:55114:97319:6855:15890:50821:30150:10509:71383:16560:6457:36168:1902274:6835:15696:51865:1901583:43132:15764:42318:35690:6878
16042	lipid catabolic process	14 out of 392 genes, 3.6%	42 out of 5984 background genes, 0.7%	0.00017	0	CPAR2_100810:CPAR2_205500:CPAR2_206730:CPAR2_401300:CPAR2_402710:CPAR2_501570:CPAR2_503040:LIP1:CPAR2_800020:MLS1:CPAR2_807600:CPAR2_807700:CPAR2_807710:CPAR2_807720	9437:42760:45944:19626:30447:6084:15867:15976:6071:6351:42758:44011:7031:70783:9405:6635:16042:9062:45733:16560:45333:70784:6097:46475:42318:35690
44242	cellular lipid catabolic process	13 out of 392 genes, 3.3%	37 out of 5984 background genes, 0.6%	0.00023	0	CPAR2_100810:CPAR2_205500:CPAR2_206730:CPAR2_401300:CPAR2_402710:CPAR2_501570:CPAR2_503040:CPAR2_800020:MLS1:CPAR2_807600:CPAR2_807700:CPAR2_807710:CPAR2_807720	9437:42760:45944:19626:30447:6084:15867:15976:6071:6351:42758:44011:7031:70783:9405:6635:9062:45733:16560:45333:70784:6097:46475:42318:35690
30258	lipid modification	11 out of 392 genes, 2.8%	30 out of 5984 background genes, 0.5%	0.00123	0	CPAR2_204220:CPAR2_205500:CPAR2_206730:CPAR2_401300:CPAR2_402710:CPAR2_503040:CPAR2_800020:CPAR2_807600:CPAR2_807700:CPAR2_807710:CPAR2_807720	9437:42760:30447:6084:15867:15976:48252:42758:44011:7031:9405:6635:45733:10430:16560:45333:6097:42318
19752	carboxylic acid metabolic process	44 out of 392 genes, 11.2%	327 out of 5984 background genes, 5.5%	0.0022	0	CPAR2_100820:CPAR2_101230:CPAR2_102550:CPAR2_103260:CPAR2_104190:CPAR2_108570:CPAR2_110400:CPAR2_200640:CPAR2_200790:CPAR2_201500:CPAR2_203160:CPAR2_203270:CPAR2_203980:CPAR2_204220:CPAR2_205500:CPAR2_206730:CPAR2_211040:ARO3:ALD5:CPAR2_213450:CPAR2_300930:CPAR2_400400:CPAR2_401300:CPAR2_402700:CPAR2_402710:CPAR2_404100:CPAR2_405810:CPAR2_501570:CPAR2_502590:CPAR2_503040:CPAR2_601180:CPAR2_603360…	1410:36178:6543:9437:19740:44262:42760:45944:19626:30447:6084:9072:55085:6102:6520:6559:6089:71467:9074:15867:45984:6807:10133:45329:6541:15976:1300:36244:6749:1676:90368:44182:1080:6527:44409:46148:48252:9450:16562:19631:6351:42758:44011:16573:6098:19547:7031:950:70783:19427:6508:6569:9405:46416:30448:6635:35336:9073:6099:6631:46356:6591:6207:71216:55114:6537:9062:45733:10430:52002:6066:6552:194…
6631	fatty acid metabolic process	16 out of 392 genes, 4.1%	65 out of 5984 background genes, 1.1%	0.00238	0	CPAR2_102550:CPAR2_200640:CPAR2_204220:CPAR2_205500:CPAR2_206730:CPAR2_300930:CPAR2_401300:CPAR2_402710:CPAR2_501570:CPAR2_503040:CPAR2_800020:MLS1:CPAR2_807600:CPAR2_807700:CPAR2_807710:CPAR2_807720	9437:42760:45944:19626:30447:6084:15867:15976:1676:48252:16562:6351:42758:44011:7031:70783:9405:6635:35336:6631:9062:45733:10430:16560:45333:70784:6097:15909:42318
43436	oxoacid metabolic process	44 out of 392 genes, 11.2%	337 out of 5984 background genes, 5.6%	0.00495	0	CPAR2_100820:CPAR2_101230:CPAR2_102550:CPAR2_103260:CPAR2_104190:CPAR2_108570:CPAR2_110400:CPAR2_200640:CPAR2_200790:CPAR2_201500:CPAR2_203160:CPAR2_203270:CPAR2_203980:CPAR2_204220:CPAR2_205500:CPAR2_206730:CPAR2_211040:ARO3:ALD5:CPAR2_213450:CPAR2_300930:CPAR2_400400:CPAR2_401300:CPAR2_402700:CPAR2_402710:CPAR2_404100:CPAR2_405810:CPAR2_501570:CPAR2_502590:CPAR2_503040:CPAR2_601180:CPAR2_603360…	1410:36178:6543:9437:19740:44262:42760:45944:19626:30447:6084:9072:55085:6102:6520:6559:6089:71467:9074:15867:45984:6807:10133:45329:6541:15976:1300:36244:6749:1676:90368:44182:1080:6527:44409:46148:48252:9450:16562:19631:6351:42758:44011:16573:6098:19547:7031:950:70783:19427:6508:6569:9405:46416:30448:6635:35336:9073:6099:6631:46356:6591:6207:71216:55114:6537:9062:45733:10430:52002:6066:6552:194…
6082	organic acid metabolic process	44 out of 392 genes, 11.2%	338 out of 5984 background genes, 5.6%	0.00535	0	CPAR2_100820:CPAR2_101230:CPAR2_102550:CPAR2_103260:CPAR2_104190:CPAR2_108570:CPAR2_110400:CPAR2_200640:CPAR2_200790:CPAR2_201500:CPAR2_203160:CPAR2_203270:CPAR2_203980:CPAR2_204220:CPAR2_205500:CPAR2_206730:CPAR2_211040:ARO3:ALD5:CPAR2_213450:CPAR2_300930:CPAR2_400400:CPAR2_401300:CPAR2_402700:CPAR2_402710:CPAR2_404100:CPAR2_405810:CPAR2_501570:CPAR2_502590:CPAR2_503040:CPAR2_601180:CPAR2_603360…	1410:36178:6543:9437:19740:44262:42760:45944:19626:30447:6084:9072:55085:6102:6520:6559:6089:71467:9074:15867:45984:6807:10133:45329:6541:15976:1300:36244:6749:1676:90368:44182:1080:6527:44409:46148:48252:9450:16562:19631:6351:42758:44011:16573:6098:19547:7031:950:70783:19427:6508:6569:9405:46416:30448:6635:35336:9073:6099:6631:46356:6591:6207:71216:55114:6537:9062:45733:10430:52002:6066:6552:194…
15711	organic anion transport	21 out of 392 genes, 5.4%	116 out of 5984 background genes, 1.9%	0.01356	0.0011	CPAR2_100560:CPAR2_101860:CPAR2_104450:CPAR2_106680:CPAR2_106690:CPAR2_106700:CPAR2_200640:CPAR2_200830:CPAR2_202850:CPAR2_206730:CPAR2_210610:CPAR2_301640:HIP1:CPAR2_401360:CPAR2_402040:CPAR2_403600:CPAR2_403820:CDR1:CPAR2_600610:CPAR2_801820:CPAR2_808410	19740:6849:46488:55085:15914:6847:15812:15867:97080:15810:1676:44182:15824:46618:34599:1902269:15809:3333:7031:44271:45332:70778:6635:35879:35336:15813:15903:45717:6855:71383:2001247:1902274:6835:15696:43001:1901352:15909:35690
15849	organic acid transport	17 out of 392 genes, 4.3%	86 out of 5984 background genes, 1.4%	0.02721	0.008	CPAR2_100560:CPAR2_101860:CPAR2_104450:CPAR2_106680:CPAR2_106690:CPAR2_106700:CPAR2_200640:CPAR2_200830:CPAR2_202850:CPAR2_210610:CPAR2_301640:HIP1:CPAR2_401360:CPAR2_402040:CPAR2_403820:CPAR2_801820:CPAR2_808410	19740:6849:55085:6847:15812:97080:15810:1676:44182:15824:1902269:15809:3333:44271:70778:35879:35336:15813:1902274:6835:15696:15909:35690
46942	carboxylic acid transport	17 out of 392 genes, 4.3%	86 out of 5984 background genes, 1.4%	0.02721	0.0076	CPAR2_100560:CPAR2_101860:CPAR2_104450:CPAR2_106680:CPAR2_106690:CPAR2_106700:CPAR2_200640:CPAR2_200830:CPAR2_202850:CPAR2_210610:CPAR2_301640:HIP1:CPAR2_401360:CPAR2_402040:CPAR2_403820:CPAR2_801820:CPAR2_808410	19740:6849:55085:6847:15812:97080:15810:1676:44182:15824:1902269:15809:3333:44271:70778:35879:35336:15813:1902274:6835:15696:15909:35690
6820	anion transport	23 out of 392 genes, 5.9%	140 out of 5984 background genes, 2.3%	0.02774	0.0073	CPAR2_100560:CPAR2_101860:CPAR2_104450:CPAR2_106680:CPAR2_106690:CPAR2_106700:CPAR2_200640:CPAR2_200830:CPAR2_202850:CPAR2_206730:CPAR2_210610:CPAR2_301640:HIP1:CPAR2_401360:CPAR2_402040:CPAR2_403600:CPAR2_403820:CDR1:CPAR2_600610:CPAR2_601050:CPAR2_801260:CPAR2_801820:CPAR2_808410	19740:6821:6849:46488:55085:15914:6847:15812:15867:97080:15810:6814:1676:44182:15824:46618:34599:1902269:15809:3333:7031:44271:45332:15700:70778:6635:35879:35336:15813:15699:15903:45717:6855:71383:2001247:1902274:6835:15696:43001:1901352:15909:35690:6878
55114	oxidation-reduction process	47 out of 392 genes, 12.0%	405 out of 5984 background genes, 6.8%	0.05411	0.0087	CPAR2_101230:CPAR2_101310:CPAR2_101350:CPAR2_103840:CPAR2_104190:CPAR2_104430:CPAR2_109970:CPAR2_110400:CPAR2_201240:CPAR2_201500:CPAR2_201540:CPAR2_203780:CPAR2_203980:CPAR2_204210:CPAR2_204220:CPAR2_204430:CPAR2_205500:CPAR2_206270:CPAR2_206730:CPAR2_206990:CPAR2_207700:CPAR2_211430:ALD5:CPAR2_214150:CPAR2_301020:CPAR2_401300:CPAR2_402710:FRP1:CPAR2_405810:CPAR2_407610:CPAR2_500880:ADH:CPAR2_50…	9437:6081:44262:42760:33215:30447:6084:71454:6102:6089:15867:6807:10133:45329:6827:15976:7094:5977:48252:42758:42843:34599:44011:16573:6098:7031:19427:9405:6635:6099:46356:5978:10106:55114:6537:45733:10430:52002:6066:19413:19551:19654:6085:6915:44410:19568:16560:45333:6101:22900:7126:19388:16117:32956:6097:9408:9308:6573:42318:35690
19388	galactose catabolic process	4 out of 392 genes, 1.0%	5 out of 5984 background genes, 0.1%	0.07323	0.0083	CPAR2_101350:GAL1:GAL10:GAL7	9272:42843:34599:60257:46835:55114:42149:42125:19568:1900429:33499:19388:15757:1403:52574:411
Molecular Function
16712	oxidoreductase activity, acting on paired donors, with incorporation or reduction of molecular oxygen, reduced flavin or flavoprotein as one donor, and incorporation of one atom of oxygen	7 out of 392 genes, 1.8%	9 out of 5984 background genes, 0.2%	3.85e-05	0	CPAR2_203780:CPAR2_204210:CPAR2_204220:CPAR2_206990:CPAR2_503950:CPAR2_600870:CPAR2_800520	16712:19825:18685:20037:5506:9055
3995	acyl-CoA dehydrogenase activity	5 out of 392 genes, 1.3%	5 out of 5984 background genes, 0.1%	0.00028	0	CPAR2_201240:CPAR2_807600:CPAR2_807700:CPAR2_807710:CPAR2_807720	50660:3997:3995
43169	cation binding	60 out of 392 genes, 15.3%	498 out of 5984 background genes, 8.3%	0.00038	0	CPAR2_100820:CPAR2_101310:CPAR2_101730:NCE103:CPAR2_103840:CPAR2_104430:GAL7:CPAR2_108570:CPAR2_109450:CPAR2_109760:CPAR2_109930:CPAR2_200790:CPAR2_202930:CPAR2_203160:CPAR2_203270:CPAR2_203540:CPAR2_203720:CPAR2_203780:CPAR2_204210:CPAR2_204220:CPAR2_204550:BCR1:CPAR2_206990:CPAR2_210420:CPAR2_210620:CPAR2_211420:CPAR2_213840:CPAR2_300520:CPAR2_301460:CPAR2_301730:CPAR2_302890:CPAR2_302900:CPAR2…	4008:44654:51287:16531:5506:8270:5507:16491:43169:4070:16597:16880:18685:981:3987:51087:287:987:978:46872:30145:1094:4736:1010:4088:8108:48038:32450:5524:1093:1191:1077:20037:4089:4151:90369:982:1190:8131:166:3714:43565:16712:1078:9055:3677:4575:3700:3922:44653:50177:5509:19825:30976:3676:16208:8168:50483:4075:4450:1102:8892:4053:3712:4555
46914	transition metal ion binding	49 out of 392 genes, 12.5%	378 out of 5984 background genes, 6.3%	0.00049	0	CPAR2_100820:CPAR2_101310:CPAR2_101730:NCE103:CPAR2_103840:CPAR2_104430:GAL7:CPAR2_108570:CPAR2_109760:CPAR2_200790:CPAR2_202930:CPAR2_203540:CPAR2_203780:CPAR2_204210:CPAR2_204220:CPAR2_204550:BCR1:CPAR2_206990:CPAR2_210420:CPAR2_210620:CPAR2_211420:CPAR2_213840:CPAR2_300520:CPAR2_301460:CPAR2_301730:CPAR2_302900:CPAR2_400190:CPAR2_401180:CPAR2_401470:CPAR2_404980:CPAR2_405270:CPAR2_405470:CPAR2…	16531:5506:8270:5507:16491:18685:981:51087:987:978:30145:1094:1010:8108:48038:1093:1191:1077:20037:4089:90369:982:1190:8131:3714:43565:16712:1078:9055:3677:3700:19825:3676:8168:1102:8892:4053:3712
46872	metal ion binding	57 out of 392 genes, 14.5%	491 out of 5984 background genes, 8.2%	0.00233	0	CPAR2_100820:CPAR2_101310:CPAR2_101730:NCE103:CPAR2_103840:CPAR2_104430:GAL7:CPAR2_108570:CPAR2_109450:CPAR2_109760:CPAR2_200790:CPAR2_202930:CPAR2_203160:CPAR2_203270:CPAR2_203540:CPAR2_203720:CPAR2_203780:CPAR2_204210:CPAR2_204220:CPAR2_204550:BCR1:CPAR2_206990:CPAR2_210420:CPAR2_210620:CPAR2_211420:CPAR2_213840:CPAR2_300520:CPAR2_301460:CPAR2_301730:CPAR2_302890:CPAR2_302900:CPAR2_400190:CPAR2…	4008:51287:16531:5506:8270:5507:16491:4070:16597:18685:981:51087:287:987:46872:978:30145:1094:4736:1010:4088:8108:48038:5524:1093:1191:1077:20037:4151:4089:90369:982:1190:8131:166:3714:43565:16712:1078:9055:3677:3700:3922:50177:5509:19825:30976:3676:8168:50483:4450:4075:1102:8892:4053:4555:3712
3997	acyl-CoA oxidase activity	4 out of 392 genes, 1.0%	4 out of 5984 background genes, 0.1%	0.00442	0	CPAR2_807600:CPAR2_807700:CPAR2_807710:CPAR2_807720	3997:50660:3995
8514	organic anion transmembrane transporter activity	17 out of 392 genes, 4.3%	84 out of 5984 background genes, 1.4%	0.00565	0	TNA1:CPAR2_100560:CPAR2_104450:CPAR2_106680:CPAR2_106690:CPAR2_106700:CPAR2_200830:CPAR2_202850:CPAR2_206730:CPAR2_210610:HIP1:CPAR2_401360:CPAR2_402040:CPAR2_403820:CPAR2_601050:CPAR2_801820:CPAR2_808410	15123:5313:15105:15297:295:97079:15193:15355:8519:15184:15183:15129:8508:15663:15292:15171:15104:5310
4497	monooxygenase activity	9 out of 392 genes, 2.3%	26 out of 5984 background genes, 0.4%	0.00568	0	MNX1:CPAR2_203780:CPAR2_204210:CPAR2_204220:CPAR2_206990:CPAR2_503950:CPAR2_504050:CPAR2_600870:CPAR2_800520	5506:18678:18685:20037:16712:9055:4502:19825
8270	zinc ion binding	39 out of 392 genes, 9.9%	303 out of 5984 background genes, 5.1%	0.00696	0	CPAR2_100820:CPAR2_101310:CPAR2_101730:NCE103:CPAR2_103840:GAL7:CPAR2_108570:CPAR2_109760:CPAR2_200790:CPAR2_202930:CPAR2_203540:CPAR2_204550:BCR1:CPAR2_210620:CPAR2_211420:CPAR2_300520:CPAR2_301460:CPAR2_301730:CPAR2_302900:CPAR2_400190:CPAR2_401180:CPAR2_401470:CPAR2_404980:CPAR2_405270:CPAR2_405470:CPAR2_501290:CPAR2_501570:CPAR2_502870:CPAR2_602450:CPAR2_602540:CPAR2_602830:CPAR2_700880:CPAR2…	8270:16491:981:51087:987:978:30145:1094:1010:8108:1093:1191:1077:4089:90369:982:1190:3714:43565:1078:3677:3700:3676:8168:1102:8892:4053:3712
20037	heme binding	11 out of 392 genes, 2.8%	40 out of 5984 background genes, 0.7%	0.00827	0	CPAR2_104080:CPAR2_201500:CPAR2_201540:CPAR2_203780:CPAR2_204210:CPAR2_204220:CPAR2_206990:CPAR2_210420:CPAR2_503950:CPAR2_600870:CPAR2_800520	4460:5506:18685:20037:16712:9055:104:19825:10181:16156
46906	tetrapyrrole binding	11 out of 392 genes, 2.8%	40 out of 5984 background genes, 0.7%	0.00827	0	CPAR2_104080:CPAR2_201500:CPAR2_201540:CPAR2_203780:CPAR2_204210:CPAR2_204220:CPAR2_206990:CPAR2_210420:CPAR2_503950:CPAR2_600870:CPAR2_800520	4460:5506:18685:20037:16712:9055:104:19825:10181:16156
46943	carboxylic acid transmembrane transporter activity	15 out of 392 genes, 3.8%	71 out of 5984 background genes, 1.2%	0.01008	0	CPAR2_100560:CPAR2_104450:CPAR2_106680:CPAR2_106690:CPAR2_106700:CPAR2_200830:CPAR2_202850:CPAR2_210610:HIP1:CPAR2_401360:CPAR2_402040:CPAR2_403820:CPAR2_601050:CPAR2_801820:CPAR2_808410	15123:5313:15105:15297:97079:15193:15355:8519:15184:15183:15129:8508:15292:15171:15104:5310
16491	oxidoreductase activity	48 out of 392 genes, 12.2%	412 out of 5984 background genes, 6.9%	0.01164	0	CPAR2_101230:CPAR2_101310:CPAR2_101350:MNX1:CPAR2_103600:CPAR2_103840:CPAR2_104190:CPAR2_104430:CPAR2_105480:CPAR2_109970:CPAR2_201240:CPAR2_201500:CPAR2_201540:CPAR2_203780:CPAR2_203980:CPAR2_204210:CPAR2_204220:CPAR2_204430:CPAR2_206990:CPAR2_207700:CPAR2_211430:ALD5:CPAR2_212940:CPAR2_214150:FRP1:CPAR2_407610:CPAR2_500880:ADH:CPAR2_503040:CPAR2_503950:CPAR2_504050:CPAR2_600160:CPAR2_600270:CPA…	4460:51287:5506:8270:5507:4032:18678:16722:8692:16491:4364:18685:3997:4029:287:32866:4491:1990042:48038:4616:3857:8442:4300:20037:293:46577:50660:70402:8131:16616:4352:3729:3995:16712:4030:9055:4602:104:4502:19825:16651:4657:4450:16175:10181:50662:47935:16156:47002
5342	organic acid transmembrane transporter activity	15 out of 392 genes, 3.8%	72 out of 5984 background genes, 1.2%	0.01199	0	CPAR2_100560:CPAR2_104450:CPAR2_106680:CPAR2_106690:CPAR2_106700:CPAR2_200830:CPAR2_202850:CPAR2_210610:HIP1:CPAR2_401360:CPAR2_402040:CPAR2_403820:CPAR2_601050:CPAR2_801820:CPAR2_808410	15123:5313:15105:15297:97079:15193:15355:8519:15184:15183:15129:8508:15292:15171:15104:5310
8509	anion transmembrane transporter activity	18 out of 392 genes, 4.6%	101 out of 5984 background genes, 1.7%	0.01947	0.0013	TNA1:CPAR2_100560:CPAR2_104450:CPAR2_106680:CPAR2_106690:CPAR2_106700:CPAR2_200830:CPAR2_202850:CPAR2_206730:CPAR2_210610:HIP1:CPAR2_401360:CPAR2_402040:CPAR2_403820:CPAR2_601050:CPAR2_801260:CPAR2_801820:CPAR2_808410	15123:5313:5247:15105:15297:295:97079:15193:15355:8519:15184:15183:15129:8508:15663:15292:15171:15104:5310
22857	transmembrane transporter activity	38 out of 392 genes, 9.7%	309 out of 5984 background genes, 5.2%	0.02418	0.0025	TNA1:CPAR2_100560:CPAR2_104450:CPAR2_106680:CPAR2_106690:CPAR2_106700:CPAR2_108340:CPAR2_108370:CPAR2_200830:CPAR2_202850:CPAR2_203720:CPAR2_206730:CPAR2_206850:CPAR2_209780:CPAR2_210080:CPAR2_210610:CPAR2_301390:HIP1:CPAR2_400790:CPAR2_401360:CPAR2_401450:CPAR2_402040:CPAR2_402410:CPAR2_403600:CPAR2_403820:CDR1:CPAR2_407200:CPAR2_503880:CPAR2_504080:CPAR2_600460:CPAR2_600750:CPAR2_601050:CPAR2_6…	5365:4008:15123:5313:5247:15203:15293:15105:5355:22891:15297:5548:295:97079:46872:15238:5415:5524:42626:15266:4012:10174:166:34257:15193:15355:8559:8519:15184:15244:15183:15129:8508:15572:8144:15663:15292:5427:15171:15104:1901584:5310
48037	cofactor binding	25 out of 392 genes, 6.4%	170 out of 5984 background genes, 2.8%	0.02431	0.0024	CPAR2_100480:CPAR2_101350:CPAR2_104430:CPAR2_104460:GAL10:GAL102:CPAR2_201240:CPAR2_201500:CPAR2_203270:CPAR2_204430:CPAR2_207700:CPAR2_211040:CPAR2_213450:GRP2:CPAR2_400400:CPAR2_402700:CPAR2_404100:CPAR2_407610:CPAR2_601180:CPAR2_801250:CPAR2_804200:CPAR2_807600:CPAR2_807700:CPAR2_807710:CPAR2_807720	8483:4460:51287:5507:3997:287:32866:48038:4616:8793:8442:20037:4034:46577:50660:70402:4587:8131:3978:30246:16616:3729:3995:8460:4021:50177:3824:30976:47536:4450:10181:3867:50662:47935:4793:30170
981	sequence-specific DNA binding RNA polymerase II transcription factor activity	19 out of 392 genes, 4.8%	113 out of 5984 background genes, 1.9%	0.02805	0.0033	CPAR2_101730:CPAR2_108570:CPAR2_109760:CPAR2_110380:CPAR2_200790:CPAR2_211180:CPAR2_301730:CPAR2_302900:CPAR2_400190:CPAR2_401180:CPAR2_401470:CPAR2_405270:CPAR2_501290:CPAR2_501570:CPAR2_700880:CPAR2_704370:CPAR2_802440:CPAR2_806830:MRR1	8270:981:987:978:1094:1010:46983:1093:1191:1077:982:1190:51019:3714:43565:1078:3677:3700:1102:1103:1133:3712
1071	nucleic acid binding transcription factor activity	24 out of 392 genes, 6.1%	166 out of 5984 background genes, 2.8%	0.04377	0.0032	CPAR2_101730:CPAR2_108570:CPAR2_109760:CPAR2_110380:CPAR2_200790:BCR1:CPAR2_211180:CPAR2_301730:CPAR2_302900:CPAR2_400190:CPAR2_401180:CPAR2_401470:CPAR2_405270:CPAR2_501290:CPAR2_501570:CPAR2_700880:CPAR2_704370:CPAR2_800440:CPAR2_802440:CPAR2_804070:CPAR2_805000:CPAR2_805900:CPAR2_806830:MRR1	977:8270:981:987:978:1094:1010:46983:1093:1191:1077:982:1190:51019:3714:43565:1078:3677:3700:1102:1103:1133:3712
3700	sequence-specific DNA binding transcription factor activity	24 out of 392 genes, 6.1%	166 out of 5984 background genes, 2.8%	0.04377	0.003	CPAR2_101730:CPAR2_108570:CPAR2_109760:CPAR2_110380:CPAR2_200790:BCR1:CPAR2_211180:CPAR2_301730:CPAR2_302900:CPAR2_400190:CPAR2_401180:CPAR2_401470:CPAR2_405270:CPAR2_501290:CPAR2_501570:CPAR2_700880:CPAR2_704370:CPAR2_800440:CPAR2_802440:CPAR2_804070:CPAR2_805000:CPAR2_805900:CPAR2_806830:MRR1	977:8270:981:987:978:1094:1010:46983:1093:1191:1077:982:1190:51019:3714:43565:1078:3677:3700:1102:1103:1133:3712
22891	substrate-specific transmembrane transporter activity	34 out of 392 genes, 8.7%	275 out of 5984 background genes, 4.6%	0.05124	0.0029	TNA1:CPAR2_100560:CPAR2_104450:CPAR2_106680:CPAR2_106690:CPAR2_106700:CPAR2_108340:CPAR2_108370:CPAR2_200830:CPAR2_202850:CPAR2_203720:CPAR2_206730:CPAR2_206850:CPAR2_209780:CPAR2_210080:CPAR2_210610:CPAR2_301390:HIP1:CPAR2_400790:CPAR2_401360:CPAR2_401450:CPAR2_402040:CPAR2_402410:CPAR2_403820:CPAR2_503880:CPAR2_504080:CPAR2_600460:CPAR2_601050:CPAR2_602760:CPAR2_701650:CPAR2_800720:CPAR2_801260…	5365:4008:15123:5313:5247:15203:15293:15105:5355:22891:15297:295:97079:46872:15238:5415:15266:10174:166:34257:15193:15355:8519:15184:15183:15129:8508:15572:15663:15292:5427:15171:15104:1901584:5310
Cellular Component
42579	microbody	23 out of 392 genes, 5.9%	82 out of 5984 background genes, 1.4%	1.62e-07	0	CPAR2_100100:CPAR2_102550:CPAR2_105480:CPAR2_201240:CPAR2_201500:CPAR2_201540:CPAR2_205500:CPAR2_206730:CPAR2_209850:CPAR2_300930:CPAR2_401300:CPAR2_402710:CPAR2_407450:CPAR2_503040:CPAR2_504090:CPAR2_800020:CPAR2_801040:CIT1:MLS1:CPAR2_807600:CPAR2_807700:CPAR2_807710:CPAR2_807720	5829:5758:5739:5777:32153:5634:5778:5782:5938:5779:30133:9514:16021
5777	peroxisome	23 out of 392 genes, 5.9%	82 out of 5984 background genes, 1.4%	1.62e-07	0	CPAR2_100100:CPAR2_102550:CPAR2_105480:CPAR2_201240:CPAR2_201500:CPAR2_201540:CPAR2_205500:CPAR2_206730:CPAR2_209850:CPAR2_300930:CPAR2_401300:CPAR2_402710:CPAR2_407450:CPAR2_503040:CPAR2_504090:CPAR2_800020:CPAR2_801040:CIT1:MLS1:CPAR2_807600:CPAR2_807700:CPAR2_807710:CPAR2_807720	5829:5758:5739:5777:32153:5634:5778:5782:5938:30133:5779:9514:16021
9514	glyoxysome	11 out of 392 genes, 2.8%	27 out of 5984 background genes, 0.5%	5.86e-05	0	CPAR2_102550:CPAR2_105480:CPAR2_201240:CPAR2_201500:CPAR2_201540:CPAR2_206730:CPAR2_209850:CPAR2_401300:CPAR2_503040:CIT1:MLS1	5829:5758:5777:5739:5634:5782:5779:9514
31224	intrinsic component of membrane	62 out of 392 genes, 15.8%	551 out of 5984 background genes, 9.2%	0.00143	0	TNA1:CPAR2_100330:CPAR2_100470:CPAR2_100560:CPAR2_101860:CPAR2_102760:CPAR2_106690:CPAR2_106700:CPAR2_108340:CPAR2_108370:CPAR2_108710:CPAR2_201560:CPAR2_203160:CPAR2_203720:CPAR2_203890:CPAR2_206730:CPAR2_206850:CPAR2_209150:CPAR2_210080:CPAR2_210610:CPAR2_300770:CPAR2_301390:CPAR2_301640:CPAR2_302140:HIP1:CPAR2_400160:CPAR2_400230:CPAR2_400660:CPAR2_400790:CPAR2_401450:RHD3:CPAR2_402040:CPAR2_4…	30176:9986:5789:31965:46658:506:51286:5934:9514:329:16021:5621:5886:30658:32153:5887:5742:30445:30446:31307:51285:5737:5768:5829:328:30137:5777:5739:5783:31207:5794:5938:5779:33101:32126:9277:1411:5802:30428:31201:5576:45121
16021	integral component of membrane	60 out of 392 genes, 15.3%	528 out of 5984 background genes, 8.8%	0.0015	0	TNA1:CPAR2_100330:CPAR2_100470:CPAR2_100560:CPAR2_101860:CPAR2_102760:CPAR2_106690:CPAR2_106700:CPAR2_108340:CPAR2_108370:CPAR2_108710:CPAR2_201560:CPAR2_203160:CPAR2_203720:CPAR2_203890:CPAR2_206730:CPAR2_206850:CPAR2_209150:CPAR2_210080:CPAR2_210610:CPAR2_300770:CPAR2_301390:CPAR2_301640:HIP1:CPAR2_400160:CPAR2_400230:CPAR2_400660:CPAR2_400790:CPAR2_401450:CPAR2_402040:CPAR2_402410:CPAR2_403600…	30176:9986:5789:31965:506:51286:5934:9514:329:16021:5886:30658:5887:32153:5742:31307:51285:5737:5768:5829:328:30137:5777:31207:5783:5739:5794:5938:5779:32126:9277:5802:1411:31201:45121
Results for CPH2 KO (upregulated genes)
GOID	GO_term	Cluster frequency	Background frequency	Corrected P-value	False discovery rate	Gene(s) annotated to the term	Directly Annotated GOID List
Biological Process
6091	generation of precursor metabolites and energy	41 out of 590 genes, 6.9%	120 out of 5984 background genes, 2.0%	2.32e-10	0	CPAR2_100440:CPAR2_101070:CPAR2_101410:KGD1:CPAR2_103180:CPAR2_103800:CPAR2_103910:CPAR2_103940:CPAR2_108460:CPAR2_203600:CPAR2_203760:CPAR2_204260:CPAR2_204580:PGI1:CPAR2_206020:CPAR2_207210:COX4:CPAR2_209250:CPAR2_209870:CPAR2_209880:CPAR2_210070:CPAR2_211610:CPAR2_211810:AAC1:CPAR2_400470:CPAR2_400800:CPAR2_401730:MNP1:CYC1:PDA1:CPAR2_500290:PDC11:CPAR2_602950:CPAR2_603020:AOX2:CPAR2_800850:CP…	6096:9060:32889:30448:288:51701:12501:44262:45944:44114:8298:51156:6099:6013:44416:6002:18293:55085:19564:48315:9061:6102:6123:40009:55114:71216:6559:6744:6537:42149:6094:7163:6979:15867:8361:6121:15976:6086:949:16226:6915:1300:15866:51211:6090:30437:15886:6122:6461:10230:45333:19660:46323:36180:6007:6000:44409:7005:19655:1901003:34484:9267:44011:1302:6412:46015:32445:6098:6106:22904:15992:71276:…
45333	cellular respiration	31 out of 590 genes, 5.3%	83 out of 5984 background genes, 1.4%	1.56e-08	0	CPAR2_100440:CPAR2_101410:KGD1:CPAR2_103180:CPAR2_103800:CPAR2_103910:CPAR2_103940:CPAR2_108460:CPAR2_203600:CPAR2_203760:CPAR2_204580:COX4:CPAR2_209250:CPAR2_209870:CPAR2_209880:CPAR2_210070:CPAR2_211610:AAC1:CPAR2_400470:CPAR2_400800:CPAR2_401730:MNP1:CYC1:CPAR2_500290:CPAR2_603020:AOX2:CPAR2_800850:CPAR2_803970:CPAR2_804860:CPAR2_806050:CPAR2_808200	9060:30448:288:12501:44262:45944:44114:8298:6099:48315:18293:55085:19564:9061:6102:6123:40009:6744:6537:42149:6979:15867:6121:16226:6915:1300:15866:30437:15886:6461:6122:10230:45333:6007:7005:1901003:34484:44011:1302:6412:6106:22904:71585:71276:51646:36170:6108:35690:33617:71456:6839
55114	oxidation-reduction process	82 out of 590 genes, 13.9%	405 out of 5984 background genes, 6.8%	5.93e-08	0	CPAR2_100440:CPAR2_101410:CPAR2_101680:CPAR2_102630:KGD1:CPAR2_103180:CPAR2_103800:CPAR2_103910:CPAR2_103940:CPAR2_106820:CPAR2_108460:CPAR2_110090:CPAR2_110430:CPAR2_200520:CPAR2_202600:CPAR2_203520:CPAR2_203530:CPAR2_203600:CPAR2_203760:CPAR2_204260:CPAR2_204580:PGI1:CPAR2_206680:ARG5,6:COX4:CPAR2_209250:CPAR2_209870:CPAR2_209880:CPAR2_209910:CPAR2_210070:CPAR2_210130:CPAR2_210140:CPAR2_211610:…	6096:9060:6006:30448:288:12501:44262:45944:15677:44114:8298:51156:6099:6801:6013:44416:6002:18293:7623:55085:19564:48315:9061:52565:45454:6882:6102:6116:6123:40009:55114:6559:6744:16558:6537:42149:6094:7163:19379:6979:15867:6066:6950:6121:7160:15976:6086:46210:949:9082:16226:6915:1300:15866:51211:6090:9051:30437:15886:6461:6122:44406:6526:10230:45333:19660:46323:44182:2:6007:19430:909:71451:7005:…
9145	purine nucleoside triphosphate biosynthetic process	14 out of 590 genes, 2.4%	19 out of 5984 background genes, 0.3%	6.25e-08	0	CPAR2_101390:CPAR2_104130:CPAR2_104710:ATP1:CPAR2_200290:CPAR2_201840:CPAR2_208740:CPAR2_213170:CPAR2_402220:CPAR2_402770:CPAR2_503440:CPAR2_600210:CPAR2_700780:CPAR2_803150	6974:61508:30448:35786:15986:46777:6241:6979:51211:15991:42407:6461:42776:6183:6228:33615
9206	purine ribonucleoside triphosphate biosynthetic process	14 out of 590 genes, 2.4%	19 out of 5984 background genes, 0.3%	6.25e-08	0	CPAR2_101390:CPAR2_104130:CPAR2_104710:ATP1:CPAR2_200290:CPAR2_201840:CPAR2_208740:CPAR2_213170:CPAR2_402220:CPAR2_402770:CPAR2_503440:CPAR2_600210:CPAR2_700780:CPAR2_803150	6974:61508:30448:35786:15986:46777:6241:6979:51211:15991:42407:6461:42776:6183:6228:33615
7005	mitochondrion organization	57 out of 590 genes, 9.7%	238 out of 5984 background genes, 4.0%	8.98e-08	0	CPAR2_100240:CPAR2_102810:CPAR2_104030:CPAR2_104710:CPAR2_104970:CPAR2_105050:CPAR2_105820:CPAR2_106030:CPAR2_106280:CPAR2_107820:CPAR2_107830:CPAR2_108100:CPAR2_108670:CPAR2_109120:TUF1:CPAR2_200610:CPAR2_201110:CPAR2_201840:CPAR2_202900:HSP60:CPAR2_203760:CPAR2_205840:CPAR2_209510:CPAR2_210500:CPAR2_211560:CPAR2_211580:CPAR2_213170:CPAR2_302470:CPAR2_303070:CPAR2_400600:CPAR2_401130:CPAR2_40124…	45861:51204:9060:30448:288:51131:6413:12501:2001246:6813:8298:6353:97250:6843:35786:15986:32048:70096:6458:40009:55114:70124:6310:34605:50821:70150:30150:6970:43335:9082:6915:9847:42407:32981:6627:6457:33619:2:1:36164:6414:7005:7007:45039:32543:46685:6355:72670:34551:42026:15742:34599:70131:90297:6515:8053:51604:1302:30001:46337:33108:10892:9100:70159:32079:33615:45040:15992:1101:6424:51646:6508:…
15985	energy coupled proton transport, down electrochemical gradient	13 out of 590 genes, 2.2%	17 out of 5984 background genes, 0.3%	1.45e-07	0	CPAR2_104130:CPAR2_104710:ATP1:CPAR2_200290:CPAR2_201840:CPAR2_208740:CPAR2_213170:CPAR2_402220:CPAR2_402770:CPAR2_503440:CPAR2_600210:CPAR2_700780:CPAR2_803150	35786:15986:15991:42407:6461:42776:33615
15986	ATP synthesis coupled proton transport	13 out of 590 genes, 2.2%	17 out of 5984 background genes, 0.3%	1.45e-07	0	CPAR2_104130:CPAR2_104710:ATP1:CPAR2_200290:CPAR2_201840:CPAR2_208740:CPAR2_213170:CPAR2_402220:CPAR2_402770:CPAR2_503440:CPAR2_600210:CPAR2_700780:CPAR2_803150	35786:15986:15991:42407:6461:42776:33615
9201	ribonucleoside triphosphate biosynthetic process	14 out of 590 genes, 2.4%	20 out of 5984 background genes, 0.3%	1.89e-07	0	CPAR2_101390:CPAR2_104130:CPAR2_104710:ATP1:CPAR2_200290:CPAR2_201840:CPAR2_208740:CPAR2_213170:CPAR2_402220:CPAR2_402770:CPAR2_503440:CPAR2_600210:CPAR2_700780:CPAR2_803150	6974:61508:30448:35786:15986:46777:6241:6979:51211:15991:42407:6461:42776:6183:6228:33615
9060	aerobic respiration	25 out of 590 genes, 4.2%	63 out of 5984 background genes, 1.1%	3.44e-07	0	CPAR2_100440:CPAR2_101410:KGD1:CPAR2_103180:CPAR2_103800:CPAR2_103910:CPAR2_103940:CPAR2_203600:CPAR2_203760:CPAR2_204580:COX4:CPAR2_209250:CPAR2_211610:AAC1:CPAR2_400470:CPAR2_400800:CPAR2_401730:MNP1:CPAR2_500290:CPAR2_603020:AOX2:CPAR2_803970:CPAR2_804860:CPAR2_806050:CPAR2_808200	9060:30448:288:12501:44262:45944:44114:8298:6099:48315:18293:55085:19564:9061:6102:6123:40009:6744:6537:42149:6979:15867:6121:16226:6915:1300:15866:30437:15886:6461:6122:10230:6007:7005:1901003:34484:44011:1302:6412:6106:71585:71276:51646:36170:6108:35690:33617:71456:6839
15980	energy derivation by oxidation of organic compounds	33 out of 590 genes, 5.6%	103 out of 5984 background genes, 1.7%	3.97e-07	0	CPAR2_100440:CPAR2_101410:KGD1:CPAR2_103180:CPAR2_103800:CPAR2_103910:CPAR2_103940:CPAR2_108460:CPAR2_203600:CPAR2_203760:CPAR2_204260:CPAR2_204580:COX4:CPAR2_209250:CPAR2_209870:CPAR2_209880:CPAR2_210070:CPAR2_211610:AAC1:CPAR2_400470:CPAR2_400800:CPAR2_401730:MNP1:CYC1:CPAR2_500290:PDC11:CPAR2_603020:AOX2:CPAR2_800850:CPAR2_803970:CPAR2_804860:CPAR2_806050:CPAR2_808200	6096:9060:30448:288:12501:44262:45944:44114:8298:51156:6099:6013:6002:48315:18293:55085:19564:9061:6102:6123:40009:6559:6744:6537:42149:6979:15867:6121:949:16226:6915:1300:15866:6090:30437:15886:6461:6122:10230:45333:19660:46323:6007:7005:19655:1901003:34484:44011:1302:6412:6106:22904:71585:71276:51646:36170:6569:6108:35690:33617:71456:6839
6754	ATP biosynthetic process	13 out of 590 genes, 2.2%	18 out of 5984 background genes, 0.3%	4.77e-07	0	CPAR2_104130:CPAR2_104710:ATP1:CPAR2_200290:CPAR2_201840:CPAR2_208740:CPAR2_213170:CPAR2_402220:CPAR2_402770:CPAR2_503440:CPAR2_600210:CPAR2_700780:CPAR2_803150	35786:15986:15991:42407:6461:42776:33615
9142	nucleoside triphosphate biosynthetic process	14 out of 590 genes, 2.4%	22 out of 5984 background genes, 0.4%	1.29e-06	0	CPAR2_101390:CPAR2_104130:CPAR2_104710:ATP1:CPAR2_200290:CPAR2_201840:CPAR2_208740:CPAR2_213170:CPAR2_402220:CPAR2_402770:CPAR2_503440:CPAR2_600210:CPAR2_700780:CPAR2_803150	6974:61508:30448:35786:15986:46777:6241:6979:51211:15991:42407:6461:42776:6183:6228:33615
42451	purine nucleoside biosynthetic process	17 out of 590 genes, 2.9%	34 out of 5984 background genes, 0.6%	3.58e-06	0	CPAR2_101390:CPAR2_104130:CPAR2_104710:ATP1:CPAR2_200290:CPAR2_201840:CPAR2_207990:CPAR2_208740:CPAR2_213170:CPAR2_402220:CPAR2_402770:CPAR2_503440:CPAR2_600210:CPAR2_602110:CPAR2_700780:CPAR2_803150:CPAR2_803640	6974:61508:43935:30448:6270:35786:15986:6172:6556:46777:6241:6979:6555:51211:15991:42407:6461:909:46084:46939:42776:6183:6228:46938:6106:33615:71585:71276:70814:44208
46129	purine ribonucleoside biosynthetic process	17 out of 590 genes, 2.9%	34 out of 5984 background genes, 0.6%	3.58e-06	0	CPAR2_101390:CPAR2_104130:CPAR2_104710:ATP1:CPAR2_200290:CPAR2_201840:CPAR2_207990:CPAR2_208740:CPAR2_213170:CPAR2_402220:CPAR2_402770:CPAR2_503440:CPAR2_600210:CPAR2_602110:CPAR2_700780:CPAR2_803150:CPAR2_803640	6974:61508:43935:30448:6270:35786:15986:6172:6556:46777:6241:6979:6555:51211:15991:42407:6461:909:46084:46939:42776:6183:6228:46938:6106:33615:71585:71276:70814:44208
46034	ATP metabolic process	13 out of 590 genes, 2.2%	22 out of 5984 background genes, 0.4%	1.9e-05	0	CPAR2_104130:CPAR2_104710:ATP1:CPAR2_200290:CPAR2_201840:CPAR2_208740:CPAR2_213170:CPAR2_402220:CPAR2_402770:CPAR2_503440:CPAR2_600210:CPAR2_700780:CPAR2_803150	35786:15986:15991:42407:6461:42776:33615
42455	ribonucleoside biosynthetic process	17 out of 590 genes, 2.9%	38 out of 5984 background genes, 0.6%	3.02e-05	0	CPAR2_101390:CPAR2_104130:CPAR2_104710:ATP1:CPAR2_200290:CPAR2_201840:CPAR2_207990:CPAR2_208740:CPAR2_213170:CPAR2_402220:CPAR2_402770:CPAR2_503440:CPAR2_600210:CPAR2_602110:CPAR2_700780:CPAR2_803150:CPAR2_803640	6974:61508:43935:30448:6270:35786:15986:6172:6556:46777:6241:6979:6555:51211:15991:42407:6461:909:46084:46939:42776:6183:6228:46938:6106:33615:71585:71276:70814:44208
9163	nucleoside biosynthetic process	17 out of 590 genes, 2.9%	38 out of 5984 background genes, 0.6%	3.02e-05	0	CPAR2_101390:CPAR2_104130:CPAR2_104710:ATP1:CPAR2_200290:CPAR2_201840:CPAR2_207990:CPAR2_208740:CPAR2_213170:CPAR2_402220:CPAR2_402770:CPAR2_503440:CPAR2_600210:CPAR2_602110:CPAR2_700780:CPAR2_803150:CPAR2_803640	6974:61508:43935:30448:6270:35786:15986:6172:6556:46777:6241:6979:6555:51211:15991:42407:6461:909:46084:46939:42776:6183:6228:46938:6106:33615:71585:71276:70814:44208
9127	purine nucleoside monophosphate biosynthetic process	15 out of 590 genes, 2.5%	33 out of 5984 background genes, 0.6%	0.00015	0	CPAR2_104130:CPAR2_104710:ATP1:CPAR2_200290:CPAR2_201840:CPAR2_208740:CPAR2_213170:CPAR2_402220:CPAR2_402770:CPAR2_503440:CPAR2_600210:CPAR2_602110:CPAR2_700780:CPAR2_803150:CPAR2_803640	6270:35786:15986:6172:15991:42407:6461:46084:46939:42776:46938:6106:33615:71585:71276:70814:44208
9168	purine ribonucleoside monophosphate biosynthetic process	15 out of 590 genes, 2.5%	33 out of 5984 background genes, 0.6%	0.00015	0	CPAR2_104130:CPAR2_104710:ATP1:CPAR2_200290:CPAR2_201840:CPAR2_208740:CPAR2_213170:CPAR2_402220:CPAR2_402770:CPAR2_503440:CPAR2_600210:CPAR2_602110:CPAR2_700780:CPAR2_803150:CPAR2_803640	6270:35786:15986:6172:15991:42407:6461:46084:46939:42776:46938:6106:33615:71585:71276:70814:44208
1901659	glycosyl compound biosynthetic process	17 out of 590 genes, 2.9%	42 out of 5984 background genes, 0.7%	0.00018	0	CPAR2_101390:CPAR2_104130:CPAR2_104710:ATP1:CPAR2_200290:CPAR2_201840:CPAR2_207990:CPAR2_208740:CPAR2_213170:CPAR2_402220:CPAR2_402770:CPAR2_503440:CPAR2_600210:CPAR2_602110:CPAR2_700780:CPAR2_803150:CPAR2_803640	6974:61508:43935:30448:6270:35786:15986:6172:6556:46777:6241:6979:6555:51211:15991:42407:6461:909:46084:46939:42776:6183:6228:46938:6106:33615:71585:71276:70814:44208
42775	mitochondrial ATP synthesis coupled electron transport	11 out of 590 genes, 1.9%	19 out of 5984 background genes, 0.3%	0.00034	0	CPAR2_103180:CPAR2_103800:CPAR2_103940:COX4:CPAR2_209870:CPAR2_209880:CPAR2_210070:CPAR2_400800:CYC1:CPAR2_803970:CPAR2_806050	9060:45944:6099:48315:18293:6123:40009:6121:16226:30437:6122
9152	purine ribonucleotide biosynthetic process	16 out of 590 genes, 2.7%	39 out of 5984 background genes, 0.7%	0.00034	0	CPAR2_101390:CPAR2_104130:CPAR2_104710:ATP1:CPAR2_200290:CPAR2_201840:CPAR2_208740:CPAR2_213170:CPAR2_402220:CPAR2_402770:CPAR2_503440:CPAR2_600210:CPAR2_602110:CPAR2_700780:CPAR2_803150:CPAR2_803640	6974:61508:30448:6270:35786:15986:6172:46777:6241:6979:51211:15991:42407:6461:46084:46939:42776:6183:6228:46938:6106:33615:71585:71276:70814:44208
6839	mitochondrial transport	22 out of 590 genes, 3.7%	69 out of 5984 background genes, 1.2%	0.00041	0	CPAR2_100240:CPAR2_102810:CPAR2_104030:CPAR2_105050:CPAR2_105820:CPAR2_108670:HSP60:CPAR2_205840:CPAR2_211560:AAC1:CPAR2_400600:CPAR2_401240:CPAR2_402220:CPAR2_402540:CPAR2_500400:YHM2:CPAR2_700590:CPAR2_801330:CPAR2_802570:MGE1:CPAR2_807690:CPAR2_807840	9060:51131:6843:55085:19564:9061:70096:6458:40009:55114:6979:34605:50821:15867:30150:6970:90374:43335:6915:15866:9847:15991:15886:6627:6457:33619:2:6007:45039:46685:1901003:42776:34484:42026:15742:34599:6515:51604:10892:32079:45040:1101:6508:6879:45041:71456:6839
6006	glucose metabolic process	13 out of 590 genes, 2.2%	27 out of 5984 background genes, 0.5%	0.00048	0	CPAR2_202600:CPAR2_203520:CPAR2_204260:PGI1:CPAR2_211810:ZWF1:AAC1:PDC11:CPAR2_602950:CPAR2_800530:CPAR2_803750:CPAR2_804740:CPAR2_808670	6096:9060:6006:30448:51701:44262:51156:6013:44416:6002:55085:19564:48315:9061:55114:6559:16558:6094:7163:6979:15867:7160:15976:949:6915:15866:51211:6090:9051:15886:44406:19660:46323:6007:19655:1901003:34484:34599:6098:42542:6108:6569:72593:71456:6839
6164	purine nucleotide biosynthetic process	16 out of 590 genes, 2.7%	40 out of 5984 background genes, 0.7%	0.00051	0	CPAR2_101390:CPAR2_104130:CPAR2_104710:ATP1:CPAR2_200290:CPAR2_201840:CPAR2_208740:CPAR2_213170:CPAR2_402220:CPAR2_402770:CPAR2_503440:CPAR2_600210:CPAR2_602110:CPAR2_700780:CPAR2_803150:CPAR2_803640	6974:61508:30448:6270:35786:15986:6172:46777:6241:6979:51211:15991:42407:6461:46084:46939:42776:6183:6228:46938:6106:33615:71585:71276:70814:44208
72522	purine-containing compound biosynthetic process	18 out of 590 genes, 3.1%	51 out of 5984 background genes, 0.9%	0.00089	0	CPAR2_101390:CPAR2_104130:CPAR2_104710:ATP1:CPAR2_200290:CPAR2_201840:CPAR2_207990:CPAR2_208740:CPAR2_213170:CPAR2_402220:CPAR2_402770:CPAR2_503440:CPAR2_600210:CPAR2_602110:CPAR2_700780:CPAR2_802800:CPAR2_803150:CPAR2_803640	6974:61508:43935:30448:6270:44416:35786:15986:6172:6556:46777:6241:6979:6555:51211:15991:42407:6461:909:46084:46939:42776:6183:6228:46938:9086:44030:6106:33615:71585:71276:70814:44208
15992	proton transport	15 out of 590 genes, 2.5%	37 out of 5984 background genes, 0.6%	0.00097	0	CPAR2_101070:CPAR2_104130:CPAR2_104710:ATP1:CPAR2_109120:CPAR2_200290:CPAR2_201840:CPAR2_208740:CPAR2_213170:CPAR2_402220:CPAR2_402770:CPAR2_503440:CPAR2_600210:CPAR2_700780:CPAR2_803150	6096:51204:6813:6002:35786:15986:15991:42407:6461:42776:33615:15992
6818	hydrogen transport	15 out of 590 genes, 2.5%	38 out of 5984 background genes, 0.6%	0.00146	0	CPAR2_101070:CPAR2_104130:CPAR2_104710:ATP1:CPAR2_109120:CPAR2_200290:CPAR2_201840:CPAR2_208740:CPAR2_213170:CPAR2_402220:CPAR2_402770:CPAR2_503440:CPAR2_600210:CPAR2_700780:CPAR2_803150	6096:51204:6813:6002:35786:15986:15991:42407:6461:42776:33615:15992
9126	purine nucleoside monophosphate metabolic process	15 out of 590 genes, 2.5%	38 out of 5984 background genes, 0.6%	0.00146	0	CPAR2_104130:CPAR2_104710:ATP1:CPAR2_200290:CPAR2_201840:CPAR2_208740:CPAR2_213170:CPAR2_402220:CPAR2_402770:CPAR2_503440:CPAR2_600210:CPAR2_602110:CPAR2_700780:CPAR2_803150:CPAR2_803640	6270:35786:15986:6172:15991:42407:6461:46084:46939:42776:46938:6106:33615:71585:71276:70814:44208
9167	purine ribonucleoside monophosphate metabolic process	15 out of 590 genes, 2.5%	38 out of 5984 background genes, 0.6%	0.00146	0	CPAR2_104130:CPAR2_104710:ATP1:CPAR2_200290:CPAR2_201840:CPAR2_208740:CPAR2_213170:CPAR2_402220:CPAR2_402770:CPAR2_503440:CPAR2_600210:CPAR2_602110:CPAR2_700780:CPAR2_803150:CPAR2_803640	6270:35786:15986:6172:15991:42407:6461:46084:46939:42776:46938:6106:33615:71585:71276:70814:44208
70585	protein localization to mitochondrion	19 out of 590 genes, 3.2%	58 out of 5984 background genes, 1.0%	0.00164	0	CPAR2_100240:CPAR2_102810:CPAR2_104030:CPAR2_105050:CPAR2_105820:CPAR2_108670:CPAR2_109120:HSP60:CPAR2_205840:CPAR2_211560:CPAR2_400600:CPAR2_401240:CPAR2_402540:CPAR2_500400:CPAR2_700590:CPAR2_802570:MGE1:CPAR2_807690:CPAR2_807840	51204:51131:6813:70096:6458:40009:55114:34605:50821:30150:6970:43335:6915:9847:6627:6457:33619:2:45039:46685:42026:34599:6515:51604:10892:32079:45040:15992:1101:6508:6879:45041
72655	establishment of protein localization to mitochondrion	19 out of 590 genes, 3.2%	58 out of 5984 background genes, 1.0%	0.00164	0	CPAR2_100240:CPAR2_102810:CPAR2_104030:CPAR2_105050:CPAR2_105820:CPAR2_108670:CPAR2_109120:HSP60:CPAR2_205840:CPAR2_211560:CPAR2_400600:CPAR2_401240:CPAR2_402540:CPAR2_500400:CPAR2_700590:CPAR2_802570:MGE1:CPAR2_807690:CPAR2_807840	51204:51131:6813:70096:6458:40009:55114:34605:50821:30150:6970:43335:6915:9847:6627:6457:33619:2:45039:46685:42026:34599:6515:51604:10892:32079:45040:15992:1101:6508:6879:45041
9260	ribonucleotide biosynthetic process	16 out of 590 genes, 2.7%	43 out of 5984 background genes, 0.7%	0.00165	0	CPAR2_101390:CPAR2_104130:CPAR2_104710:ATP1:CPAR2_200290:CPAR2_201840:CPAR2_208740:CPAR2_213170:CPAR2_402220:CPAR2_402770:CPAR2_503440:CPAR2_600210:CPAR2_602110:CPAR2_700780:CPAR2_803150:CPAR2_803640	6974:61508:30448:6270:35786:15986:6172:46777:6241:6979:51211:15991:42407:6461:46084:46939:42776:6183:6228:46938:6106:33615:71585:71276:70814:44208
6626	protein targeting to mitochondrion	18 out of 590 genes, 3.1%	53 out of 5984 background genes, 0.9%	0.00172	0	CPAR2_100240:CPAR2_102810:CPAR2_104030:CPAR2_105050:CPAR2_105820:CPAR2_108670:HSP60:CPAR2_205840:CPAR2_211560:CPAR2_400600:CPAR2_401240:CPAR2_402540:CPAR2_500400:CPAR2_700590:CPAR2_802570:MGE1:CPAR2_807690:CPAR2_807840	51131:70096:6458:40009:55114:34605:50821:30150:6970:43335:6915:9847:6627:6457:33619:2:45039:46685:42026:34599:6515:51604:10892:32079:45040:1101:6508:6879:45041
1902600	hydrogen ion transmembrane transport	13 out of 590 genes, 2.2%	30 out of 5984 background genes, 0.5%	0.00217	0	CPAR2_104130:CPAR2_104710:ATP1:CPAR2_200290:CPAR2_201840:CPAR2_208740:CPAR2_213170:CPAR2_402220:CPAR2_402770:CPAR2_503440:CPAR2_600210:CPAR2_700780:CPAR2_803150	35786:15986:15991:42407:6461:42776:33615
22904	respiratory electron transport chain	12 out of 590 genes, 2.0%	26 out of 5984 background genes, 0.4%	0.00241	0	CPAR2_103180:CPAR2_103800:CPAR2_103940:COX4:CPAR2_209870:CPAR2_209880:CPAR2_210070:CPAR2_400800:CYC1:CPAR2_800850:CPAR2_803970:CPAR2_806050	9060:45944:6099:48315:18293:6123:40009:6121:16226:30437:6122:22904
6096	glycolytic process	9 out of 590 genes, 1.5%	15 out of 5984 background genes, 0.3%	0.00291	0	CPAR2_101070:CPAR2_204260:PGI1:CPAR2_206020:CPAR2_207210:CPAR2_211810:PDA1:CPAR2_602950:CPAR2_807980	6096:32889:30448:51701:51156:6013:44416:6002:48315:55114:71216:6094:7163:8361:15976:6086:51211:19660:46323:36180:6000:44409:9267:1302:46015:32445:6098:15992:46835:36170:42867
9156	ribonucleoside monophosphate biosynthetic process	15 out of 590 genes, 2.5%	40 out of 5984 background genes, 0.7%	0.00316	0	CPAR2_104130:CPAR2_104710:ATP1:CPAR2_200290:CPAR2_201840:CPAR2_208740:CPAR2_213170:CPAR2_402220:CPAR2_402770:CPAR2_503440:CPAR2_600210:CPAR2_602110:CPAR2_700780:CPAR2_803150:CPAR2_803640	6270:35786:15986:6172:15991:42407:6461:46084:46939:42776:46938:6106:33615:71585:71276:70814:44208
6122	mitochondrial electron transport, ubiquinol to cytochrome c	7 out of 590 genes, 1.2%	9 out of 5984 background genes, 0.2%	0.00319	0	CPAR2_103180:CPAR2_103800:CPAR2_103940:CPAR2_210070:CPAR2_400800:CYC1:CPAR2_806050	9060:48315:6123:40009:16226:6122
42773	ATP synthesis coupled electron transport	11 out of 590 genes, 1.9%	23 out of 5984 background genes, 0.4%	0.00422	0	CPAR2_103180:CPAR2_103800:CPAR2_103940:COX4:CPAR2_209870:CPAR2_209880:CPAR2_210070:CPAR2_400800:CYC1:CPAR2_803970:CPAR2_806050	9060:45944:6099:48315:18293:6123:40009:6121:16226:30437:6122
6119	oxidative phosphorylation	11 out of 590 genes, 1.9%	23 out of 5984 background genes, 0.4%	0.00422	0	CPAR2_103180:CPAR2_103800:CPAR2_103940:COX4:CPAR2_209870:CPAR2_209880:CPAR2_210070:CPAR2_400800:CYC1:CPAR2_803970:CPAR2_806050	9060:45944:6099:48315:18293:6123:40009:6121:16226:30437:6122
6461	protein complex assembly	45 out of 590 genes, 7.6%	230 out of 5984 background genes, 3.8%	0.00497	0	CPAR2_100380:CPAR2_103280:CPAR2_104130:CPAR2_104710:CPAR2_104970:CPAR2_106280:CPAR2_106360:CPAR2_107020:CPAR2_200610:CPAR2_200850:CPAR2_201110:CPAR2_201840:CPAR2_202340:CPAR2_202630:CPAR2_202900:HSP60:CPAR2_203760:CPAR2_205840:CPAR2_206160:CPAR2_208740:CPAR2_209510:CPAR2_210030:CPAR2_210500:CPAR2_213130:CPAR2_213170:CPAR2_302470:CPAR2_303070:CPAR2_401730:CPAR2_402770:CPAR2_403750:CPAR2_404530:CPA…	6974:9060:43935:30448:51131:51726:723:12501:32968:30447:97250:30433:35786:35066:15986:70096:6458:71216:492:7021:70072:6303:45899:34605:50821:6887:30150:42981:30010:6289:43248:42407:80129:6461:32981:43161:43486:6457:44182:6334:36180:6511:6406:70481:1900429:32543:34551:42026:34729:30466:10499:70131:9267:30163:51604:1302:7264:2181:30001:33108:70682:33615:45040:36170:6508:6357:9405:35690:45041:33617:…
46390	ribose phosphate biosynthetic process	16 out of 590 genes, 2.7%	47 out of 5984 background genes, 0.8%	0.00642	0	CPAR2_101390:CPAR2_104130:CPAR2_104710:ATP1:CPAR2_200290:CPAR2_201840:CPAR2_208740:CPAR2_213170:CPAR2_402220:CPAR2_402770:CPAR2_503440:CPAR2_600210:CPAR2_602110:CPAR2_700780:CPAR2_803150:CPAR2_803640	6974:61508:30448:6270:35786:15986:6172:46777:6241:6979:51211:15991:42407:6461:46084:46939:42776:6183:6228:46938:6106:33615:71585:71276:70814:44208
9124	nucleoside monophosphate biosynthetic process	15 out of 590 genes, 2.5%	42 out of 5984 background genes, 0.7%	0.00643	0	CPAR2_104130:CPAR2_104710:ATP1:CPAR2_200290:CPAR2_201840:CPAR2_208740:CPAR2_213170:CPAR2_402220:CPAR2_402770:CPAR2_503440:CPAR2_600210:CPAR2_602110:CPAR2_700780:CPAR2_803150:CPAR2_803640	6270:35786:15986:6172:15991:42407:6461:46084:46939:42776:46938:6106:33615:71585:71276:70814:44208
Molecular Function
15078	hydrogen ion transmembrane transporter activity	24 out of 590 genes, 4.1%	58 out of 5984 background genes, 1.0%	7.35e-08	0	CPAR2_101410:CPAR2_103180:CPAR2_103800:CPAR2_103940:CPAR2_104130:CPAR2_104710:ATP1:CPAR2_200290:CPAR2_200610:CPAR2_201840:COX4:CPAR2_208740:CPAR2_209870:CPAR2_209880:CPAR2_213170:CPAR2_400800:CPAR2_402220:CPAR2_402770:CPAR2_503440:CPAR2_600210:CPAR2_600370:CPAR2_700780:CPAR2_803150:CPAR2_806050	46961:46933:5198:5524:8270:46872:43531:8121:4129:51537:16887
3735	structural constituent of ribosome	42 out of 590 genes, 7.1%	156 out of 5984 background genes, 2.6%	1.89e-07	0	CPAR2_103030:CPAR2_105600:CPAR2_106440:CPAR2_109350:CPAR2_109940:CPAR2_200270:CPAR2_202200:CPAR2_202330:CPAR2_202550:CPAR2_203410:CPAR2_203600:CPAR2_204190:CPAR2_205880:CPAR2_206780:CPAR2_207320:CPAR2_208930:CPAR2_209360:CPAR2_209410:CPAR2_210020:CPAR2_300230:CPAR2_302470:CPAR2_302710:CPAR2_303360:CPAR2_303640:CPAR2_304090:CPAR2_304170:CPAR2_401430:CPAR2_403460:MNP1:CPAR2_501830:CPAR2_503450:CPAR…	3735:19843:3723:16740
46933	proton-transporting ATP synthase activity, rotational mechanism	10 out of 590 genes, 1.7%	11 out of 5984 background genes, 0.2%	2.58e-07	0	CPAR2_104710:ATP1:CPAR2_200290:CPAR2_208740:CPAR2_213170:CPAR2_402220:CPAR2_503440:CPAR2_600210:CPAR2_700780:CPAR2_803150	46961:46933:5524:43531:16887
44769	ATPase activity, coupled to transmembrane movement of ions, rotational mechanism	13 out of 590 genes, 2.2%	22 out of 5984 background genes, 0.4%	5.01e-06	0	CPAR2_104130:CPAR2_104710:ATP1:CPAR2_200290:CPAR2_201840:CPAR2_208740:CPAR2_213170:CPAR2_402220:CPAR2_402770:CPAR2_503440:CPAR2_600210:CPAR2_700780:CPAR2_803150	46961:46933:5198:5524:43531:16887
16491	oxidoreductase activity	76 out of 590 genes, 12.9%	412 out of 5984 background genes, 6.9%	7.2e-06	0	CPAR2_101410:CPAR2_101680:CPAR2_102630:KGD1:CPAR2_103180:CPAR2_103800:CPAR2_103910:CPAR2_103940:CPAR2_105790:CPAR2_106820:CPAR2_107920:CPAR2_108460:CPAR2_110090:CPAR2_110430:CPAR2_200520:CPAR2_200610:CPAR2_201550:CPAR2_203520:CPAR2_204580:CPAR2_206960:ARG5,6:COX4:CPAR2_209510:CPAR2_209870:CPAR2_209880:CPAR2_209910:CPAR2_210130:CPAR2_210140:CPAR2_211610:CPAR2_213080:CPAR2_300580:CPAR2_300620:CPAR2…	51287:5506:4449:8270:5507:4090:8198:8121:4742:16491:4316:15036:3690:8379:19171:4364:4791:4129:51920:9916:32542:4489:287:46872:4312:46983:4784:4314:4365:4616:4128:15039:16966:8137:16971:20037:8106:293:4318:50660:4739:9013:16616:50661:43565:3959:3729:51539:51864:4315:43236:4608:48037:1078:4313:9055:3677:4604:8177:3862:4602:8941:19825:4319:30976:16651:3942:32454:4450:4345:33743:4591:8823:4455:8897:1…
15077	monovalent inorganic cation transmembrane transporter activity	24 out of 590 genes, 4.1%	71 out of 5984 background genes, 1.2%	8.77e-06	0	CPAR2_101410:CPAR2_103180:CPAR2_103800:CPAR2_103940:CPAR2_104130:CPAR2_104710:ATP1:CPAR2_200290:CPAR2_200610:CPAR2_201840:COX4:CPAR2_208740:CPAR2_209870:CPAR2_209880:CPAR2_213170:CPAR2_400800:CPAR2_402220:CPAR2_402770:CPAR2_503440:CPAR2_600210:CPAR2_600370:CPAR2_700780:CPAR2_803150:CPAR2_806050	46933:8270:43531:8121:4129:46872:5198:5524:46961:16887:51537
46961	proton-transporting ATPase activity, rotational mechanism	12 out of 590 genes, 2.0%	21 out of 5984 background genes, 0.4%	3.07e-05	0	CPAR2_104130:CPAR2_104710:ATP1:CPAR2_200290:CPAR2_201840:CPAR2_208740:CPAR2_213170:CPAR2_402220:CPAR2_402770:CPAR2_503440:CPAR2_600210:CPAR2_803150	46933:43531:5198:5524:46961:16887
36442	hydrogen-exporting ATPase activity	12 out of 590 genes, 2.0%	22 out of 5984 background genes, 0.4%	6.16e-05	0	CPAR2_104130:CPAR2_104710:ATP1:CPAR2_200290:CPAR2_201840:CPAR2_208740:CPAR2_213170:CPAR2_402220:CPAR2_402770:CPAR2_503440:CPAR2_600210:CPAR2_803150	46933:43531:5198:5524:46961:16887
5198	structural molecule activity	49 out of 590 genes, 8.3%	256 out of 5984 background genes, 4.3%	0.00092	0	CPAR2_103030:CPAR2_103890:CPAR2_105600:CPAR2_106440:CPAR2_109350:CPAR2_109940:CPAR2_200270:CPAR2_201840:CPAR2_202200:CPAR2_202330:CPAR2_202550:CPAR2_203410:CPAR2_203600:CPAR2_204190:CPAR2_205880:CPAR2_206780:CPAR2_207320:CPAR2_208930:CPAR2_209360:CPAR2_209410:CPAR2_210020:CPAR2_300230:CPAR2_302470:CPAR2_302710:CPAR2_303360:CPAR2_303640:CPAR2_304090:CPAR2_304170:CPAR2_401430:CPAR2_402770:CPAR2_403…	3735:32947:1106:19843:978:5198:17025:46961:15450:5546:3723:16740:5078
19829	cation-transporting ATPase activity	14 out of 590 genes, 2.4%	36 out of 5984 background genes, 0.6%	0.00108	0	CPAR2_104130:CPAR2_104710:ATP1:CPAR2_200290:CPAR2_201840:CPAR2_208740:CPAR2_213170:CPAR2_303120:CPAR2_402220:CPAR2_402770:CPAR2_503440:CPAR2_600210:CPAR2_700780:CPAR2_803150	46933:5507:43531:5198:5524:166:46961:16887:19829
42625	ATPase activity, coupled to transmembrane movement of ions	14 out of 590 genes, 2.4%	37 out of 5984 background genes, 0.6%	0.00159	0	CPAR2_104130:CPAR2_104710:ATP1:CPAR2_200290:CPAR2_201840:CPAR2_208740:CPAR2_213170:CPAR2_303120:CPAR2_402220:CPAR2_402770:CPAR2_503440:CPAR2_600210:CPAR2_700780:CPAR2_803150	46933:5507:43531:5198:5524:166:46961:16887:19829
22890	inorganic cation transmembrane transporter activity	26 out of 590 genes, 4.4%	104 out of 5984 background genes, 1.7%	0.00173	0	CPAR2_101410:CPAR2_103180:CPAR2_103800:CPAR2_103940:CPAR2_104130:CPAR2_104710:ATP1:CPAR2_200290:CPAR2_200610:CPAR2_201840:COX4:CPAR2_208740:CPAR2_209870:CPAR2_209880:CPAR2_213170:CPAR2_400800:CPAR2_402220:CPAR2_402770:SMF12:CPAR2_503440:CPAR2_600210:CPAR2_600370:CPAR2_602990:CPAR2_700780:CPAR2_803150:CPAR2_806050	46933:8270:43531:8121:4129:46872:5198:5524:22890:46961:16887:15295:15088:51537
16679	oxidoreductase activity, acting on diphenols and related substances as donors	7 out of 590 genes, 1.2%	10 out of 5984 background genes, 0.2%	0.00256	0	CPAR2_101410:CPAR2_103180:CPAR2_103800:CPAR2_103940:CPAR2_400800:AOX2:CPAR2_806050	8121:9916:46872:51537
4298	threonine-type endopeptidase activity	8 out of 590 genes, 1.4%	14 out of 5984 background genes, 0.2%	0.00475	0	CPAR2_100380:CPAR2_204240:CPAR2_204750:CPAR2_404530:CPAR2_502990:CPAR2_503510:CPAR2_701350:CPAR2_702390	4175:4298
70003	threonine-type peptidase activity	8 out of 590 genes, 1.4%	14 out of 5984 background genes, 0.2%	0.00475	0	CPAR2_100380:CPAR2_204240:CPAR2_204750:CPAR2_404530:CPAR2_502990:CPAR2_503510:CPAR2_701350:CPAR2_702390	4175:4298
16681	oxidoreductase activity, acting on diphenols and related substances as donors, cytochrome as acceptor	6 out of 590 genes, 1.0%	8 out of 5984 background genes, 0.1%	0.00671	0	CPAR2_101410:CPAR2_103180:CPAR2_103800:CPAR2_103940:CPAR2_400800:CPAR2_806050	8121:46872:51537
8121	ubiquinol-cytochrome-c reductase activity	6 out of 590 genes, 1.0%	8 out of 5984 background genes, 0.1%	0.00671	0	CPAR2_101410:CPAR2_103180:CPAR2_103800:CPAR2_103940:CPAR2_400800:CPAR2_806050	8121:46872:51537
22804	active transmembrane transporter activity	25 out of 590 genes, 4.2%	106 out of 5984 background genes, 1.8%	0.00781	0	CPAR2_104030:CPAR2_104130:CPAR2_104710:ATP1:CPAR2_200290:CPAR2_201840:CPAR2_205440:CPAR2_208740:CPAR2_213170:CPAR2_213230:CPAR2_213250:CPAR2_303120:AAC1:CPAR2_402220:CPAR2_402770:CPAR2_404450:CPAR2_406100:SMF12:CPAR2_503440:CPAR2_600210:YHM2:CPAR2_700780:CPAR2_801330:CPAR2_803150:CPAR2_808530	46933:227:5507:43531:1901235:15297:15238:5198:5524:22890:8271:42626:15266:15421:166:15220:46961:3677:16887:5471:15450:34228:5315:19829:15295:5371:34658
Cellular Component
44429	mitochondrial part	128 out of 590 genes, 21.7%	435 out of 5984 background genes, 7.3%	5.37e-31	0	CPAR2_100240:CPAR2_100440:CPAR2_101390:CPAR2_101410:CPAR2_101680:KGD1:CPAR2_102810:CPAR2_103030:CPAR2_103180:CPAR2_103250:CPAR2_103800:CPAR2_103940:CPAR2_104030:CPAR2_104130:CPAR2_104710:CPAR2_104970:CPAR2_105050:ATP1:CPAR2_105820:CPAR2_105870:CPAR2_108460:CPAR2_108670:CPAR2_109120:CPAR2_109350:CPAR2_200270:CPAR2_200290:CPAR2_200610:CPAR2_201110:CPAR2_201840:CPAR2_202200:CPAR2_202330:CPAR2_202900…	31942:274:32473:5763:9986:276:5744:5745:97002:42645:31966:9514:5762:329:16021:5967:5759:5886:5750:790:5756:72380:42719:22625:5742:34098:5962:97249:30445:9353:30446:36266:31307:5761:1405:1990112:44284:5829:5758:5783:5777:5739:42653:42652:837:275:5743:31305:5730:5754:5740:5749:5634:43332:31314:5751:42721:17087:5576:5741
5739	mitochondrion	201 out of 590 genes, 34.1%	943 out of 5984 background genes, 15.8%	4.32e-29	0	CPAR2_100240:CPAR2_100390:CPAR2_100440:CPAR2_101070:CPAR2_101110:CPAR2_101390:CPAR2_101410:CPAR2_101680:CPAR2_102470:CPAR2_102630:KGD1:CPAR2_102810:CPAR2_103030:CPAR2_103180:CPAR2_103190:CPAR2_103250:CPAR2_103280:CPAR2_103800:CPAR2_103910:CPAR2_103940:CPAR2_104030:CPAR2_104130:CPAR2_104710:CPAR2_104970:CPAR2_105050:CPAR2_105130:ATP1:CPAR2_105600:CPAR2_105790:CPAR2_105820:CPAR2_105870:CPAR2_106030…	5763:9986:276:5744:5745:19773:42645:324:31966:5762:329:5967:5759:5750:5886:790:5756:786:5945:22625:9353:36266:31307:46695:44284:5840:5777:42653:71595:42652:837:275:5743:5960:5749:31934:5740:5754:15:34515:43332:31314:5751:17087:45239:31942:274:42175:32473:812:5789:97002:31011:30874:9514:16021:72380:42719:5811:5742:34098:5962:97249:30445:30446:5761:124:1405:1990112:5829:5758:5739:5783:5835:31305:16…
5743	mitochondrial inner membrane	59 out of 590 genes, 10.0%	158 out of 5984 background genes, 2.6%	1.2e-18	0	CPAR2_100240:CPAR2_101410:CPAR2_102810:CPAR2_103180:CPAR2_103800:CPAR2_103940:CPAR2_104030:CPAR2_104130:CPAR2_104710:CPAR2_105050:ATP1:CPAR2_105820:CPAR2_105870:CPAR2_109120:CPAR2_200290:CPAR2_201840:CPAR2_203760:CPAR2_204190:CPAR2_204580:CPAR2_206680:COX4:CPAR2_208740:CPAR2_209870:CPAR2_209880:CPAR2_210070:CPAR2_210500:CPAR2_211580:CPAR2_213130:CPAR2_213170:CPAR2_303070:AAC1:CPAR2_400600:CPAR2_4…	9986:276:5744:5745:42645:5762:5759:5886:5750:5756:31307:44284:42653:42652:275:5743:5749:5754:31314:5751:31942:274:97002:16021:72380:42719:97249:30445:30446:5761:1405:5829:5758:31305:5634:42721:5576:5741
5740	mitochondrial envelope	86 out of 590 genes, 14.6%	305 out of 5984 background genes, 5.1%	2.07e-18	0	CPAR2_100240:CPAR2_100440:CPAR2_101390:CPAR2_101410:CPAR2_102810:CPAR2_103180:CPAR2_103800:CPAR2_103940:CPAR2_104030:CPAR2_104130:CPAR2_104710:CPAR2_105050:ATP1:CPAR2_105820:CPAR2_105870:CPAR2_108460:CPAR2_109120:CPAR2_200290:CPAR2_200610:CPAR2_201110:CPAR2_201840:CPAR2_202200:CPAR2_202900:CPAR2_203760:CPAR2_204190:CPAR2_204580:CPAR2_205840:CPAR2_206680:COX4:CPAR2_208740:CPAR2_209870:CPAR2_209880…	5763:9986:276:5744:5745:42645:31966:5762:329:5967:5759:5750:5886:790:5756:22625:36266:31307:44284:42653:42652:837:275:5743:5749:5740:5754:43332:31314:5751:31942:274:32473:97002:16021:72380:42719:5742:34098:5962:97249:30445:30446:5761:1405:1990112:5829:5758:5783:5739:31305:5634:42721:5576:5741
19866	organelle inner membrane	59 out of 590 genes, 10.0%	165 out of 5984 background genes, 2.8%	1.48e-17	0	CPAR2_100240:CPAR2_101410:CPAR2_102810:CPAR2_103180:CPAR2_103800:CPAR2_103940:CPAR2_104030:CPAR2_104130:CPAR2_104710:CPAR2_105050:ATP1:CPAR2_105820:CPAR2_105870:CPAR2_109120:CPAR2_200290:CPAR2_201840:CPAR2_203760:CPAR2_204190:CPAR2_204580:CPAR2_206680:COX4:CPAR2_208740:CPAR2_209870:CPAR2_209880:CPAR2_210070:CPAR2_210500:CPAR2_211580:CPAR2_213130:CPAR2_213170:CPAR2_303070:AAC1:CPAR2_400600:CPAR2_4…	9986:276:5744:5745:42645:5762:5759:5886:5750:5756:31307:44284:42653:42652:275:5743:5749:5754:31314:5751:31942:274:97002:16021:72380:42719:97249:30445:30446:5761:1405:5829:5758:31305:5634:42721:5576:5741
44455	mitochondrial membrane part	52 out of 590 genes, 8.8%	137 out of 5984 background genes, 2.3%	1.3e-16	0	CPAR2_100240:CPAR2_101410:CPAR2_102810:CPAR2_103180:CPAR2_103800:CPAR2_103940:CPAR2_104030:CPAR2_104130:CPAR2_104710:CPAR2_105050:ATP1:CPAR2_105820:CPAR2_105870:CPAR2_200290:CPAR2_201840:CPAR2_203760:CPAR2_204580:CPAR2_205840:CPAR2_206680:COX4:CPAR2_208740:CPAR2_209870:CPAR2_209880:CPAR2_210070:CPAR2_210500:CPAR2_213130:CPAR2_213170:CPAR2_303070:CPAR2_400600:CPAR2_400800:CPAR2_401240:CPAR2_401680…	9986:276:5744:5745:42645:5759:5886:5750:790:5756:22625:36266:31307:44284:42653:42652:837:275:5743:5749:5754:43332:31314:5751:31942:274:32473:97002:16021:72380:42719:5742:34098:97249:30445:30446:1405:1990112:5829:5758:5739:31305:5634:42721:5741
5759	mitochondrial matrix	55 out of 590 genes, 9.3%	154 out of 5984 background genes, 2.6%	3.16e-16	0	CPAR2_101680:KGD1:CPAR2_103030:CPAR2_103250:CPAR2_104970:CPAR2_105050:ATP1:CPAR2_108670:CPAR2_109350:CPAR2_200270:CPAR2_202200:CPAR2_202330:HSP60:CPAR2_203410:CPAR2_203600:CPAR2_204190:ARG5,6:COX4:CPAR2_209250:CPAR2_209910:CPAR2_210020:CPAR2_211560:CPAR2_211610:CPAR2_300230:CPAR2_302470:CPAR2_302710:CPAR2_303360:CPAR2_303640:CPAR2_304090:CPAR2_400470:CPAR2_401730:PDB1:CPAR2_403460:MNP1:PDA1:CPAR2…	5763:9986:42645:31966:5762:329:5967:5750:5886:5759:9353:5777:5743:5749:5754:5751:17087:9514:72380:5962:30445:30446:5761:1405:5829:5758:5730:5634:5576
31966	mitochondrial membrane	73 out of 590 genes, 12.4%	260 out of 5984 background genes, 4.3%	3.35e-15	0	CPAR2_100240:CPAR2_101410:CPAR2_102810:CPAR2_103180:CPAR2_103800:CPAR2_103940:CPAR2_104030:CPAR2_104130:CPAR2_104710:CPAR2_105050:ATP1:CPAR2_105820:CPAR2_105870:CPAR2_109120:CPAR2_200290:CPAR2_201110:CPAR2_201840:CPAR2_202200:CPAR2_203760:CPAR2_204190:CPAR2_204580:CPAR2_205840:CPAR2_206680:COX4:CPAR2_208740:CPAR2_209870:CPAR2_209880:CPAR2_210070:CPAR2_210500:CPAR2_211580:CPAR2_211610:CPAR2_213130…	5763:9986:276:5744:5745:42645:31966:5762:5967:5759:5886:5750:790:5756:22625:36266:31307:44284:42653:42652:837:275:5743:5749:5754:43332:31314:5751:31942:274:32473:97002:16021:72380:42719:5742:34098:5962:97249:30445:30446:5761:1405:1990112:5829:5758:5739:5783:31305:5634:42721:5576:5741
31967	organelle envelope	91 out of 590 genes, 15.4%	440 out of 5984 background genes, 7.4%	2.81e-10	0	CPAR2_100240:CPAR2_100440:CPAR2_101340:CPAR2_101390:CPAR2_101410:CPAR2_102810:CPAR2_103180:CPAR2_103800:CPAR2_103940:CPAR2_104030:CPAR2_104130:CPAR2_104710:CPAR2_105050:ATP1:CPAR2_105820:CPAR2_105870:CPAR2_107180:CPAR2_108240:CPAR2_108460:CPAR2_109120:CPAR2_200290:CPAR2_200610:CPAR2_201110:CPAR2_201840:CPAR2_202200:CPAR2_202900:CPAR2_203760:CPAR2_204190:CPAR2_204580:CPAR2_205840:CPAR2_206680:CPAR…	5763:778:9986:276:5744:5745:5654:42645:31966:5762:329:5967:5759:5750:5886:790:5756:33597:22625:5641:36266:31307:5737:44284:42653:42652:5635:837:275:5743:5749:5740:5754:43332:31314:5751:31942:274:32473:97002:16021:72380:42719:5742:34098:5962:97249:776:30445:30446:5761:1405:1990112:5829:5758:5739:5783:31305:5643:5634:42721:5576:5741
31975	envelope	91 out of 590 genes, 15.4%	440 out of 5984 background genes, 7.4%	2.81e-10	0	CPAR2_100240:CPAR2_100440:CPAR2_101340:CPAR2_101390:CPAR2_101410:CPAR2_102810:CPAR2_103180:CPAR2_103800:CPAR2_103940:CPAR2_104030:CPAR2_104130:CPAR2_104710:CPAR2_105050:ATP1:CPAR2_105820:CPAR2_105870:CPAR2_107180:CPAR2_108240:CPAR2_108460:CPAR2_109120:CPAR2_200290:CPAR2_200610:CPAR2_201110:CPAR2_201840:CPAR2_202200:CPAR2_202900:CPAR2_203760:CPAR2_204190:CPAR2_204580:CPAR2_205840:CPAR2_206680:CPAR…	5763:778:9986:276:5744:5745:5654:42645:31966:5762:329:5967:5759:5750:5886:790:5756:33597:22625:5641:36266:31307:5737:44284:42653:42652:5635:837:275:5743:5749:5740:5754:43332:31314:5751:31942:274:32473:97002:16021:72380:42719:5742:34098:5962:97249:776:30445:30446:5761:1405:1990112:5829:5758:5739:5783:31305:5643:5634:42721:5576:5741
5753	mitochondrial proton-transporting ATP synthase complex	13 out of 590 genes, 2.2%	15 out of 5984 background genes, 0.3%	1.84e-09	0	CPAR2_104130:CPAR2_104710:ATP1:CPAR2_200290:CPAR2_201840:CPAR2_208740:CPAR2_213170:CPAR2_402220:CPAR2_402770:CPAR2_503440:CPAR2_600210:CPAR2_700780:CPAR2_803150	9986:276:42645:5886:5756:275:5754:274:30446:5829:5741
5746	mitochondrial respiratory chain	17 out of 590 genes, 2.9%	26 out of 5984 background genes, 0.4%	2.43e-09	0	CPAR2_101410:CPAR2_103180:CPAR2_103800:CPAR2_103940:CPAR2_105870:CPAR2_204580:CPAR2_206680:COX4:CPAR2_209870:CPAR2_209880:CPAR2_210070:CPAR2_210500:CPAR2_303070:CPAR2_400800:CPAR2_600370:CPAR2_803970:CPAR2_806050	9986:42645:5759:5886:5750:42653:42652:5749:5751:97249:30445:5829:5758:31305:5634
70469	respiratory chain	17 out of 590 genes, 2.9%	27 out of 5984 background genes, 0.5%	5.98e-09	0	CPAR2_101410:CPAR2_103180:CPAR2_103800:CPAR2_103940:CPAR2_105870:CPAR2_204580:CPAR2_206680:COX4:CPAR2_209870:CPAR2_209880:CPAR2_210070:CPAR2_210500:CPAR2_303070:CPAR2_400800:CPAR2_600370:CPAR2_803970:CPAR2_806050	9986:42645:5759:5886:5750:42653:42652:5749:5751:97249:30445:5829:5758:31305:5634
45259	proton-transporting ATP synthase complex	13 out of 590 genes, 2.2%	17 out of 5984 background genes, 0.3%	3.47e-08	0	CPAR2_104130:CPAR2_104710:ATP1:CPAR2_200290:CPAR2_201840:CPAR2_208740:CPAR2_213170:CPAR2_402220:CPAR2_402770:CPAR2_503440:CPAR2_600210:CPAR2_700780:CPAR2_803150	9986:276:42645:5886:5756:275:5754:274:30446:5829:5741
313	organellar ribosome	28 out of 590 genes, 4.7%	76 out of 5984 background genes, 1.3%	5.45e-08	0	CPAR2_103030:CPAR2_104970:CPAR2_109350:CPAR2_200270:CPAR2_202200:CPAR2_202330:CPAR2_203410:CPAR2_203600:CPAR2_204190:CPAR2_210020:CPAR2_300230:CPAR2_302470:CPAR2_302710:CPAR2_303360:CPAR2_303640:CPAR2_304090:CPAR2_401730:CPAR2_403460:MNP1:CPAR2_501830:CPAR2_601460:CPAR2_602170:MRPL4:CPAR2_702190:CPAR2_704230:CPAR2_800110:CPAR2_802920:CPAR2_803720	5763:42645:31966:5762:5886:5743:5761:5829:5758:5730:5634
5761	mitochondrial ribosome	28 out of 590 genes, 4.7%	76 out of 5984 background genes, 1.3%	5.45e-08	0	CPAR2_103030:CPAR2_104970:CPAR2_109350:CPAR2_200270:CPAR2_202200:CPAR2_202330:CPAR2_203410:CPAR2_203600:CPAR2_204190:CPAR2_210020:CPAR2_300230:CPAR2_302470:CPAR2_302710:CPAR2_303360:CPAR2_303640:CPAR2_304090:CPAR2_401730:CPAR2_403460:MNP1:CPAR2_501830:CPAR2_601460:CPAR2_602170:MRPL4:CPAR2_702190:CPAR2_704230:CPAR2_800110:CPAR2_802920:CPAR2_803720	5763:42645:31966:5762:5886:5743:5761:5829:5758:5730:5634
70069	cytochrome complex	13 out of 590 genes, 2.2%	19 out of 5984 background genes, 0.3%	3.28e-07	0	CPAR2_101410:CPAR2_103180:CPAR2_103800:CPAR2_103940:COX4:CPAR2_209870:CPAR2_209880:CPAR2_210070:CPAR2_210500:CPAR2_303070:CPAR2_400800:CPAR2_600370:CPAR2_806050	42645:5759:5886:5750:5751:97249:5829:5758:31305:5634
1990204	oxidoreductase complex	17 out of 590 genes, 2.9%	33 out of 5984 background genes, 0.6%	4.68e-07	0	CPAR2_101410:KGD1:CPAR2_103180:CPAR2_103800:CPAR2_103940:CPAR2_105870:CPAR2_201550:CPAR2_204580:CPAR2_206680:CPAR2_210070:CPAR2_211610:CPAR2_400800:PDB1:PDA1:CPAR2_803970:LAT1:CPAR2_806050	9986:42645:31966:5967:5759:5886:5750:9353:42653:42652:5960:5749:5962:30445:5829:5758:5739
315	organellar large ribosomal subunit	17 out of 590 genes, 2.9%	41 out of 5984 background genes, 0.7%	2.85e-05	0	CPAR2_103030:CPAR2_109350:CPAR2_200270:CPAR2_202330:CPAR2_203410:CPAR2_203600:CPAR2_204190:CPAR2_210020:CPAR2_300230:CPAR2_302710:CPAR2_303360:CPAR2_303640:CPAR2_403460:CPAR2_501830:MRPL4:CPAR2_704230:CPAR2_803720	31966:5762:5743:5730
5762	mitochondrial large ribosomal subunit	17 out of 590 genes, 2.9%	41 out of 5984 background genes, 0.7%	2.85e-05	0	CPAR2_103030:CPAR2_109350:CPAR2_200270:CPAR2_202330:CPAR2_203410:CPAR2_203600:CPAR2_204190:CPAR2_210020:CPAR2_300230:CPAR2_302710:CPAR2_303360:CPAR2_303640:CPAR2_403460:CPAR2_501830:MRPL4:CPAR2_704230:CPAR2_803720	31966:5762:5743:5730
276	mitochondrial proton-transporting ATP synthase complex, coupling factor F(o)	8 out of 590 genes, 1.4%	10 out of 5984 background genes, 0.2%	9.25e-05	0	CPAR2_104130:CPAR2_104710:CPAR2_201840:CPAR2_208740:CPAR2_213170:CPAR2_402770:CPAR2_503440:CPAR2_700780	276:5886:274
1990351	transporter complex	9 out of 590 genes, 1.5%	13 out of 5984 background genes, 0.2%	0.00011	0	CPAR2_101410:CPAR2_103180:CPAR2_103800:CPAR2_103940:CPAR2_210070:CPAR2_400600:CPAR2_400800:CPAR2_806050:CPAR2_807840	5759:5886:5750:42719:5829:5758:5634:42721
31970	organelle envelope lumen	20 out of 590 genes, 3.4%	60 out of 5984 background genes, 1.0%	0.00015	0	CPAR2_100440:CPAR2_101340:CPAR2_101390:CPAR2_103180:CPAR2_200610:CPAR2_202900:CPAR2_211810:CPAR2_303180:CPAR2_400600:CPAR2_401730:CYC1:CPAR2_500070:CPAR2_503120:CPAR2_600370:CPAR2_601800:CPAR2_602110:CPAR2_603020:CPAR2_702000:CPAR2_802570:CPAR2_807840	9986:329:5759:5750:5886:5641:31307:5737:5743:5751:31314:42719:30446:5761:5829:5758:5634:42721:5576:5741
5758	mitochondrial intermembrane space	19 out of 590 genes, 3.2%	55 out of 5984 background genes, 0.9%	0.00015	0	CPAR2_100440:CPAR2_101390:CPAR2_103180:CPAR2_200610:CPAR2_202900:CPAR2_211810:CPAR2_303180:CPAR2_400600:CPAR2_401730:CYC1:CPAR2_500070:CPAR2_503120:CPAR2_600370:CPAR2_601800:CPAR2_602110:CPAR2_603020:CPAR2_702000:CPAR2_802570:CPAR2_807840	9986:329:5759:5750:5886:31307:5743:5751:31314:42719:30446:5761:5829:5758:5634:42721:5576:5741
31597	cytosolic proteasome complex	11 out of 590 genes, 1.9%	20 out of 5984 background genes, 0.3%	0.00016	0	CPAR2_100140:CPAR2_100380:CPAR2_202670:CPAR2_204240:CPAR2_204750:CPAR2_210030:CPAR2_403750:CPAR2_404530:CPAR2_503510:CPAR2_701350:CPAR2_702390	8180:19773:8540:8541:34515:42175:5739:5783:19774:5634:5576
34515	proteasome storage granule	11 out of 590 genes, 1.9%	20 out of 5984 background genes, 0.3%	0.00016	0	CPAR2_100140:CPAR2_100380:CPAR2_202670:CPAR2_204240:CPAR2_204750:CPAR2_210030:CPAR2_403750:CPAR2_404530:CPAR2_503510:CPAR2_701350:CPAR2_702390	8180:19773:8540:8541:34515:42175:5739:5783:19774:5634:5576
15934	large ribosomal subunit	22 out of 590 genes, 3.7%	71 out of 5984 background genes, 1.2%	0.00017	0	CPAR2_103030:CPAR2_109350:CPAR2_200270:CPAR2_202330:CPAR2_203410:CPAR2_203600:CPAR2_204190:CPAR2_209360:CPAR2_209410:CPAR2_210020:CPAR2_300230:CPAR2_302710:CPAR2_303360:CPAR2_303640:CPAR2_403460:CPAR2_501830:CPAR2_503450:CPAR2_602580:MRPL4:CPAR2_704230:CPAR2_803720:CPAR2_804190	9986:31966:5762:5886:790:15934:22625:36266:837:5743:43332:34098:5829:1990112:5739:5730:5634
42645	mitochondrial nucleoid	12 out of 590 genes, 2.0%	25 out of 5984 background genes, 0.4%	0.00033	0	KGD1:CPAR2_105050:ATP1:HSP60:COX4:CPAR2_209910:PDB1:MNP1:PDA1:ILV5:YHM2:LAT1	9986:42645:31966:5967:5886:9353:5777:5754:5751:72380:30445:30446:5761:1405:5829:5576
44391	ribosomal subunit	31 out of 590 genes, 5.3%	129 out of 5984 background genes, 2.2%	0.00049	0	CPAR2_103030:CPAR2_109350:CPAR2_200270:CPAR2_202200:CPAR2_202330:CPAR2_203410:CPAR2_203600:CPAR2_204190:CPAR2_205880:CPAR2_206780:CPAR2_209360:CPAR2_209410:CPAR2_210020:CPAR2_300230:CPAR2_302470:CPAR2_302710:CPAR2_303360:CPAR2_303640:CPAR2_304090:CPAR2_403460:CPAR2_501830:CPAR2_503450:CPAR2_601460:CPAR2_602170:CPAR2_602580:MRPL4:CPAR2_704230:CPAR2_800110:CPAR2_802920:CPAR2_803720:CPAR2_804190	5763:9986:31966:5762:5886:790:15934:22625:22627:36266:837:5743:43332:34098:5829:1990112:5739:5730:5634
1902495	transmembrane transporter complex	7 out of 590 genes, 1.2%	9 out of 5984 background genes, 0.2%	0.00076	0	CPAR2_101410:CPAR2_103180:CPAR2_103800:CPAR2_103940:CPAR2_210070:CPAR2_400800:CPAR2_806050	5759:5886:5750:5758
45275	respiratory chain complex III	7 out of 590 genes, 1.2%	9 out of 5984 background genes, 0.2%	0.00076	0	CPAR2_101410:CPAR2_103180:CPAR2_103800:CPAR2_103940:CPAR2_210070:CPAR2_400800:CPAR2_806050	5759:5886:5750:5758
5750	mitochondrial respiratory chain complex III	7 out of 590 genes, 1.2%	9 out of 5984 background genes, 0.2%	0.00076	0	CPAR2_101410:CPAR2_103180:CPAR2_103800:CPAR2_103940:CPAR2_210070:CPAR2_400800:CPAR2_806050	5759:5886:5750:5758
16469	proton-transporting two-sector ATPase complex	13 out of 590 genes, 2.2%	31 out of 5984 background genes, 0.5%	0.00081	0	CPAR2_104130:CPAR2_104710:ATP1:CPAR2_200290:CPAR2_201840:CPAR2_208740:CPAR2_213170:CPAR2_402220:CPAR2_402770:CPAR2_503440:CPAR2_600210:CPAR2_700780:CPAR2_803150	9986:276:42645:5886:5756:275:5754:274:30446:5829:5741
45263	proton-transporting ATP synthase complex, coupling factor F(o)	8 out of 590 genes, 1.4%	12 out of 5984 background genes, 0.2%	0.00084	0	CPAR2_104130:CPAR2_104710:CPAR2_201840:CPAR2_208740:CPAR2_213170:CPAR2_402770:CPAR2_503440:CPAR2_700780	276:5886:274
19773	proteasome core complex, alpha-subunit complex	6 out of 590 genes, 1.0%	7 out of 5984 background genes, 0.1%	0.00165	0	CPAR2_204240:CPAR2_204750:CPAR2_404530:CPAR2_502990:CPAR2_701350:CPAR2_702390	19773:34515:42175:5829:5739:5634:5576
275	mitochondrial proton-transporting ATP synthase complex, catalytic core F(1)	5 out of 590 genes, 0.8%	5 out of 5984 background genes, 0.1%	0.00264	0	ATP1:CPAR2_200290:CPAR2_402220:CPAR2_600210:CPAR2_803150	9986:42645:5886:5756:275:5754:30446:5829:5741
45261	proton-transporting ATP synthase complex, catalytic core F(1)	5 out of 590 genes, 0.8%	5 out of 5984 background genes, 0.1%	0.00264	0	ATP1:CPAR2_200290:CPAR2_402220:CPAR2_600210:CPAR2_803150	9986:42645:5886:5756:275:5754:30446:5829:5741
44444	cytoplasmic part	336 out of 590 genes, 56.9%	2905 out of 5984 background genes, 48.5%	0.00293	0.0005	CPAR2_100140:HIS1:CPAR2_100240:CPAR2_100380:CPAR2_100390:CPAR2_100440:CPAR2_100660:CPAR2_101070:CPAR2_101110:CPAR2_101120:CPAR2_101390:CPAR2_101410:CPAR2_101680:CPAR2_102320:SAPP1:CPAR2_102470:CPAR2_102630:CPAR2_102660:CPAR2_102770:KGD1:CPAR2_102810:CPAR2_102860:CPAR2_103030:CPAR2_103180:CPAR2_103190:CPAR2_103250:CPAR2_103280:CPAR2_103800:CPAR2_103850:CPAR2_103890:CPAR2_103910:CPAR2_103940:CPAR2_…	5666:5763:9986:276:5744:30122:42645:407:46658:31966:51286:785:329:5967:5826:5759:5750:71006:5688:5945:22625:32153:243:22627:30121:17053:31560:31463:9353:36266:46695:44284:5940:5840:5797:42653:71595:19005:932:8541:5635:275:71020:71014:5960:32177:31982:5801:15:34515:5751:43332:31201:5784:31942:42175:32473:812:5789:32432:31011:30134:30874:35327:42719:34098:5935:30445:5776:5686:5761:124:131:5768:1990…
9277	fungal-type cell wall	25 out of 590 genes, 4.2%	104 out of 5984 background genes, 1.7%	0.00498	0.0005	SAPP1:CPAR2_105050:ATP1:XOG1:KRE1:CPAR2_202950:CPAR2_204580:CPAR2_207210:CPAR2_207990:CPAR2_211810:CPAR2_213080:CPAR2_300120:CPAR2_302620:CPAR2_402920:CPAR2_403210:CPAR2_500920:PDC11:CPAR2_602950:CPAR2_703150:CPAR2_802800:CPAR2_804740:WSC1:CPAR2_806310:CPAR2_807980:CPAR2_808670	9986:42645:46658:935:15:30445:16020:5634:9897:5576:324:5886:5737:9277:5933:5749:5754:9514:72380:5811:30446:1405:5829:5758:5739:5783
9986	cell surface	25 out of 590 genes, 4.2%	104 out of 5984 background genes, 1.7%	0.00498	0.0005	CPAR2_105050:ATP1:XOG1:CPAR2_106440:CPAR2_202600:CPAR2_202950:CPAR2_204580:CPAR2_207210:CPAR2_207990:CPAR2_211810:CPAR2_213080:CPAR2_300120:CPAR2_401740:CPAR2_402220:CPAR2_500920:PDC11:CPAR2_602950:CPAR2_603590:CPAR2_703150:CPAR2_802800:CPAR2_804190:CPAR2_804740:CPAR2_806310:CPAR2_807980:CPAR2_808670	9986:42645:46658:22625:36266:5840:935:15:43332:34098:30445:1990112:5634:9897:5576:5741:324:5886:790:5737:837:9277:5933:5749:5754:9514:72380:5811:30446:1405:5829:5758:5739
30312	external encapsulating structure	25 out of 590 genes, 4.2%	105 out of 5984 background genes, 1.8%	0.00594	0.0005	SAPP1:CPAR2_105050:ATP1:XOG1:KRE1:CPAR2_202950:CPAR2_204580:CPAR2_207210:CPAR2_207990:CPAR2_211810:CPAR2_213080:CPAR2_300120:CPAR2_302620:CPAR2_402920:CPAR2_403210:CPAR2_500920:PDC11:CPAR2_602950:CPAR2_703150:CPAR2_802800:CPAR2_804740:WSC1:CPAR2_806310:CPAR2_807980:CPAR2_808670	9986:42645:46658:935:15:30445:16020:5634:9897:5576:324:5886:5737:9277:5933:5749:5754:9514:72380:5811:30446:1405:5829:5758:5739:5783
5618	cell wall	25 out of 590 genes, 4.2%	105 out of 5984 background genes, 1.8%	0.00594	0.0005	SAPP1:CPAR2_105050:ATP1:XOG1:KRE1:CPAR2_202950:CPAR2_204580:CPAR2_207210:CPAR2_207990:CPAR2_211810:CPAR2_213080:CPAR2_300120:CPAR2_302620:CPAR2_402920:CPAR2_403210:CPAR2_500920:PDC11:CPAR2_602950:CPAR2_703150:CPAR2_802800:CPAR2_804740:WSC1:CPAR2_806310:CPAR2_807980:CPAR2_808670	9986:42645:46658:935:15:30445:16020:5634:9897:5576:324:5886:5737:9277:5933:5749:5754:9514:72380:5811:30446:1405:5829:5758:5739:5783
502	proteasome complex	15 out of 590 genes, 2.5%	47 out of 5984 background genes, 0.8%	0.0073	0.0005	CPAR2_100140:CPAR2_100380:CPAR2_202340:CPAR2_202670:CPAR2_204240:CPAR2_204750:CPAR2_210030:CPAR2_403750:CPAR2_404530:CPAR2_502990:CPAR2_503510:CPAR2_600330:CPAR2_701350:CPAR2_702390:CPAR2_808990	8541:34515:42175:502:5634:5576:8180:19773:8540:5829:5739:5783:19774
5839	proteasome core complex	8 out of 590 genes, 1.4%	15 out of 5984 background genes, 0.3%	0.00842	0.0005	CPAR2_100380:CPAR2_204240:CPAR2_204750:CPAR2_404530:CPAR2_502990:CPAR2_503510:CPAR2_701350:CPAR2_702390	34515:42175:5634:5576:19773:5829:5739:19774
5840	ribosome	45 out of 590 genes, 7.6%	249 out of 5984 background genes, 4.2%	0.00995	0.0004	CPAR2_103030:CPAR2_104970:CPAR2_105600:CPAR2_106440:CPAR2_109350:CPAR2_109940:CPAR2_200270:CPAR2_202200:CPAR2_202330:CPAR2_202550:CPAR2_203410:CPAR2_203600:CPAR2_204190:CPAR2_205880:CPAR2_206780:CPAR2_207320:CPAR2_208930:CPAR2_209360:CPAR2_209410:CPAR2_210020:CPAR2_300230:CPAR2_302470:CPAR2_302710:CPAR2_303360:CPAR2_303640:CPAR2_304090:CPAR2_304170:CPAR2_401430:CPAR2_401730:CPAR2_403460:MNP1:CPAR…	5763:9986:42645:31966:22625:22627:36266:5840:43332:34098:5761:1990112:5634:5762:5886:790:15934:837:5743:5829:5758:5739:5730
Results for CPH2 KO (downregulated genes)
GOID	GO_term	Cluster frequency	Background frequency	Corrected P-value	False discovery rate	Gene(s) annotated to the term	Directly Annotated GOID List
Biological Process
55085	transmembrane transport	81 out of 669 genes, 12.1%	408 out of 5984 background genes, 6.8%	8.24e-05	0	TNA1:CPAR2_100330:CPAR2_100560:SFC1:CPAR2_101860:CPAR2_102760:CPAR2_103130:CPAR2_104450:CPAR2_105530:CPAR2_106080:CPAR2_106670:CPAR2_106680:CPAR2_106690:CPAR2_106700:CPAR2_108060:CPAR2_108340:CPAR2_108370:CPAR2_109920:CPAR2_200830:CPAR2_202130:CPAR2_203150:CPAR2_206870:MLT1:CPAR2_210150:CPAR2_210740:CPAR2_212620:CPAR2_212850:CPAR2_300730:CPAR2_300740:CPAR2_300930:CPAR2_301390:CPAR2_301640:HIP1:CP…	36178:43200:15840:70778:6635:19740:15802:35879:15794:35672:33215:15833:15813:15744:6631:6849:48315:55085:15753:316:15903:1402:6863:15741:10106:40009:32975:15861:55114:71216:72530:72488:6556:35442:6808:6847:71805:9062:45733:6855:15890:34605:15812:97080:15893:15850:6827:15846:15976:15847:31670:36244:10509:72489:15758:71383:34224:16560:6457:36168:44182:36180:1902274:45916:70509:44690:16562:15696:683…
16054	organic acid catabolic process	23 out of 669 genes, 3.4%	67 out of 5984 background genes, 1.1%	0.00042	0	CPAR2_100820:SFC1:CPAR2_101230:CPAR2_104190:CPAR2_108570:CPAR2_110400:CPAR2_203160:CPAR2_203270:CPAR2_203450:CPAR2_203970:GCV2:CPAR2_210960:CPAR2_211040:CPAR2_211400:CPAR2_402710:CPAR2_404100:CPAR2_405810:ADH1:CPAR2_503040:CPAR2_701650:MLS1:CPAR2_807600:CPAR2_807700	30448:6543:9437:6635:42760:45944:15744:44416:55085:6567:15741:6207:42183:55114:6559:6537:9062:45733:9074:45984:19464:6807:10133:45329:6541:6066:6552:19551:19654:15976:949:6085:1300:16560:6536:45333:90368:43605:6523:9450:19631:6351:46677:6524:6545:6097:44011:16573:122:70409:6068:19547:950:951:43418:6730:19427:42318:6508:6569:9405:44407:35690
46395	carboxylic acid catabolic process	23 out of 669 genes, 3.4%	67 out of 5984 background genes, 1.1%	0.00042	0	CPAR2_100820:SFC1:CPAR2_101230:CPAR2_104190:CPAR2_108570:CPAR2_110400:CPAR2_203160:CPAR2_203270:CPAR2_203450:CPAR2_203970:GCV2:CPAR2_210960:CPAR2_211040:CPAR2_211400:CPAR2_402710:CPAR2_404100:CPAR2_405810:ADH1:CPAR2_503040:CPAR2_701650:MLS1:CPAR2_807600:CPAR2_807700	30448:6543:9437:6635:42760:45944:15744:44416:55085:6567:15741:6207:42183:55114:6559:6537:9062:45733:9074:45984:19464:6807:10133:45329:6541:6066:6552:19551:19654:15976:949:6085:1300:16560:6536:45333:90368:43605:6523:9450:19631:6351:46677:6524:6545:6097:44011:16573:122:70409:6068:19547:950:951:43418:6730:19427:42318:6508:6569:9405:44407:35690
44282	small molecule catabolic process	25 out of 669 genes, 3.7%	82 out of 5984 background genes, 1.4%	0.00171	0	CPAR2_100820:SFC1:CPAR2_101230:CPAR2_104190:CPAR2_105520:CPAR2_108570:CPAR2_110400:CPAR2_203160:CPAR2_203270:CPAR2_203450:CPAR2_203970:GCV2:CPAR2_210960:CPAR2_211040:CPAR2_211400:CPAR2_402710:CPAR2_404100:CPAR2_405810:CPAR2_406450:ADH1:CPAR2_503040:CPAR2_701650:MLS1:CPAR2_807600:CPAR2_807700	71469:30448:6543:9437:6635:19740:42760:45944:15744:44416:55085:6567:15741:43419:6207:42183:55114:6559:6537:9062:45733:9074:45984:19464:6807:10133:45329:6541:6066:6552:19551:19654:15976:949:6085:1300:46952:16560:6536:45333:90368:43605:6523:9450:19631:6351:46677:6524:6545:6097:44011:16573:122:70409:6068:19547:950:951:43418:6730:19427:42318:6508:6569:44407:35690:9405
15893	drug transport	8 out of 669 genes, 1.2%	12 out of 5984 background genes, 0.2%	0.0083	0	CPAR2_202130:CPAR2_209780:CPAR2_300730:CPAR2_403600:CDR1:CPAR2_602760:CPAR2_703330:CPAR2_806580	15833:15903:6863:15861:71216:72530:6556:6855:15893:15847:10509:71383:46618:34599:15848:15862:45332:296:35690:15856
3333	amino acid transmembrane transport	18 out of 669 genes, 2.7%	53 out of 5984 background genes, 0.9%	0.00941	0	CPAR2_100560:CPAR2_101860:CPAR2_103130:CPAR2_106670:CPAR2_106680:CPAR2_106690:CPAR2_106700:CPAR2_108060:CPAR2_200830:CPAR2_203150:CPAR2_212620:HIP1:CPAR2_401360:CPAR2_403640:CPAR2_403820:GAP2:CPAR2_603080:CPAR2_801820	43200:70778:15802:15813:55085:32975:6808:15812:15846:44182:1902274:44690:15824:1902269:3333:6865:35690
6577	amino-acid betaine metabolic process	6 out of 669 genes, 0.9%	7 out of 5984 background genes, 0.1%	0.01308	0	CPAR2_101360:CPAR2_103260:CPAR2_110400:CPAR2_203970:CPAR2_203980:CPAR2_703500	36178:9437:6567:71216:55114:45733:6066:45329:36244:45333:36180:6545
9437	carnitine metabolic process	6 out of 669 genes, 0.9%	7 out of 5984 background genes, 0.1%	0.01308	0	CPAR2_101360:CPAR2_103260:CPAR2_110400:CPAR2_203970:CPAR2_203980:CPAR2_703500	36178:9437:6567:71216:55114:45733:6066:45329:36244:45333:36180:6545
15849	organic acid transport	24 out of 669 genes, 3.6%	86 out of 5984 background genes, 1.4%	0.01515	0	CPAR2_100560:SFC1:CPAR2_101860:CPAR2_103130:CPAR2_104450:CPAR2_106670:CPAR2_106680:CPAR2_106690:CPAR2_106700:CPAR2_108060:CPAR2_200830:CPAR2_203150:CPAR2_212620:CPAR2_301640:HIP1:CPAR2_401360:CPAR2_402040:CPAR2_403440:CPAR2_403640:CPAR2_403820:GAP2:CPAR2_603080:CPAR2_801820:CPAR2_808410	36178:43200:70778:19740:15802:35879:15813:15744:6849:55085:6888:15741:32975:71216:6808:6847:9062:45733:34605:15812:36187:97080:15846:1900436:43090:15976:36244:6457:36168:44182:36180:1902274:44690:6835:15696:15824:31669:1902269:15809:3333:6865:9405:35690
46942	carboxylic acid transport	24 out of 669 genes, 3.6%	86 out of 5984 background genes, 1.4%	0.01515	0	CPAR2_100560:SFC1:CPAR2_101860:CPAR2_103130:CPAR2_104450:CPAR2_106670:CPAR2_106680:CPAR2_106690:CPAR2_106700:CPAR2_108060:CPAR2_200830:CPAR2_203150:CPAR2_212620:CPAR2_301640:HIP1:CPAR2_401360:CPAR2_402040:CPAR2_403440:CPAR2_403640:CPAR2_403820:GAP2:CPAR2_603080:CPAR2_801820:CPAR2_808410	36178:43200:70778:19740:15802:35879:15813:15744:6849:55085:6888:15741:32975:71216:6808:6847:9062:45733:34605:15812:36187:97080:15846:1900436:43090:15976:36244:6457:36168:44182:36180:1902274:44690:6835:15696:15824:31669:1902269:15809:3333:6865:9405:35690
6865	amino acid transport	20 out of 669 genes, 3.0%	65 out of 5984 background genes, 1.1%	0.01631	0	CPAR2_100560:CPAR2_101860:CPAR2_103130:CPAR2_106670:CPAR2_106680:CPAR2_106690:CPAR2_106700:CPAR2_108060:CPAR2_200830:CPAR2_203150:CPAR2_212620:CPAR2_301640:HIP1:CPAR2_401360:CPAR2_403440:CPAR2_403640:CPAR2_403820:GAP2:CPAR2_603080:CPAR2_801820	36178:43200:70778:15802:15813:55085:6888:32975:71216:6808:34605:15812:36187:15846:1900436:43090:36244:6457:36168:44182:36180:1902274:44690:15824:31669:1902269:15809:3333:6865:9405:35690
15711	organic anion transport	28 out of 669 genes, 4.2%	116 out of 5984 background genes, 1.9%	0.05702	0.005	CPAR2_100560:SFC1:CPAR2_101860:CPAR2_103130:CPAR2_104450:CPAR2_106670:CPAR2_106680:CPAR2_106690:CPAR2_106700:CPAR2_108060:CPAR2_200830:CPAR2_203150:CPAR2_212620:CPAR2_301640:HIP1:CPAR2_401360:CPAR2_402040:CPAR2_403440:CPAR2_403600:CPAR2_403640:CPAR2_403820:CDR1:CPAR2_407640:GAP2:CPAR2_600610:CPAR2_603080:CPAR2_801820:CPAR2_808410	36178:43200:70778:19740:15802:35879:15794:15813:15744:6849:46488:55085:15903:45717:6888:15741:32975:71216:15914:6808:6847:9062:45733:6855:34605:15812:36187:97080:15846:1900436:43090:15976:36244:71383:6457:36168:44182:36180:2001247:1902274:44690:6835:15696:15824:43001:1901352:46618:1407:31669:34599:1902269:15809:3333:45332:6865:9405:35690
34470	ncRNA processing	54 out of 669 genes, 8.1%	288 out of 5984 background genes, 4.8%	0.07507	0.0077	CPAR2_101190:CPAR2_101430:CPAR2_101450:CPAR2_105010:CPAR2_105060:CPAR2_107130:CPAR2_109180:CPAR2_109810:CPAR2_110040:CPAR2_200430:CPAR2_201600:CPAR2_202180:CPAR2_203250:CPAR2_204650:CPAR2_205670:CPAR2_205890:CPAR2_206510:CPAR2_207510:CPAR2_207670:CPAR2_208860:CPAR2_210170:CPAR2_210520:CPAR2_210920:CPAR2_212540:CPAR2_300390:CPAR2_300820:CPAR2_302060:CPAR2_304200:CPAR2_400150:CPAR2_401800:CPAR2_403…	45943:16075:51083:80:6413:7346:31167:6382:55:27:7049:44416:463:31119:447:379:462:55114:71216:71038:1990120:42149:480:31120:30174:467:1900435:30010:6450:6400:31118:54:910:6461:44182:469:36180:466:184:6446:8033:9267:6267:30488:6364:6302:2181:6412:464:154:48025:494:71042:42273:36170:31591:956:472:9405:35690
Molecular Function
22857	transmembrane transporter activity	63 out of 669 genes, 9.4%	309 out of 5984 background genes, 5.2%	0.00029	0	TNA1:CPAR2_100560:SFC1:CPAR2_103130:CPAR2_104450:CPAR2_105530:CPAR2_106670:CPAR2_106680:CPAR2_106690:CPAR2_106700:CPAR2_108060:CPAR2_108230:CPAR2_108340:CPAR2_108370:CPAR2_109920:CPAR2_200830:FCY23:CPAR2_202130:CPAR2_203150:CPAR2_203720:CPAR2_206870:MLT1:CPAR2_209780:CPAR2_210150:CPAR2_210740:CPAR2_212620:CPAR2_212850:CPAR2_300730:CPAR2_301390:HIP1:CPAR2_400790:CPAR2_401360:CPAR2_401450:CPAR2_402…	15182:4008:15123:15200:7:5313:71916:4012:15398:10174:166:42937:15212:34257:51183:15169:15193:15181:15355:8559:8519:297:15293:15203:15191:15204:15489:15244:5216:5355:5290:15188:15606:319:15183:5469:22891:15297:15129:35673:15572:5385:8144:15663:5548:97079:46872:15238:15295:15079:5427:15185:1406:15205:5415:15665:5524:15189:15171:22890:1901584:42626:5310
16491	oxidoreductase activity	77 out of 669 genes, 11.5%	412 out of 5984 background genes, 6.9%	0.00065	0	CPAR2_100510:CPAR2_101230:CPAR2_101310:CPAR2_101360:CPAR2_101810:CPAR2_102140:MNX1:CPAR2_103450:CPAR2_104190:CPAR2_104530:CPAR2_105380:CPAR2_105480:CPAR2_105690:CPAR2_106080:CPAR2_109390:CPAR2_109470:CPAR2_110150:CPAR2_201040:CPAR2_201240:CPAR2_201540:CPAR2_203440:CPAR2_203450:CPAR2_203780:CPAR2_203980:CPAR2_204160:CPAR2_204220:CPAR2_205820:CPAR2_206990:CPAR2_207030:GCV2:CPAR2_207700:CPAR2_207780…	31418:51287:5506:8270:5507:4090:8198:4032:18678:47560:4506:8692:16641:16491:16747:8379:4364:18685:3997:9916:4029:287:4096:4491:1990042:18576:4109:8199:48038:4616:50353:3857:8442:4300:20037:293:50660:4022:4392:8131:16616:4352:4367:3729:51864:3995:16712:35064:4030:9055:42803:8398:140:4602:104:8144:8336:19825:18669:4657:16651:42393:4450:10181:80132:50662:16706:17150:16156:8863:15035:4375:30170
15238	drug transmembrane transporter activity	9 out of 669 genes, 1.3%	15 out of 5984 background genes, 0.3%	0.00218	0	CPAR2_202130:CPAR2_209780:CPAR2_300730:CDR1:CPAR2_600750:CPAR2_602760:CPAR2_603080:CPAR2_703330:CPAR2_806580	15203:297:15293:5290:15606:15297:15238:5415:5524:4012:10174:15212:15181:8559:15244:8144:15205:15189
90484	drug transporter activity	9 out of 669 genes, 1.3%	15 out of 5984 background genes, 0.3%	0.00218	0	CPAR2_202130:CPAR2_209780:CPAR2_300730:CDR1:CPAR2_600750:CPAR2_602760:CPAR2_603080:CPAR2_703330:CPAR2_806580	15203:297:15293:5290:15606:15297:15238:5415:5524:4012:10174:15212:15181:8559:15244:8144:15205:15189
22891	substrate-specific transmembrane transporter activity	55 out of 669 genes, 8.2%	275 out of 5984 background genes, 4.6%	0.00272	0	TNA1:CPAR2_100560:SFC1:CPAR2_103130:CPAR2_104450:CPAR2_105530:CPAR2_106670:CPAR2_106680:CPAR2_106690:CPAR2_106700:CPAR2_108060:CPAR2_108230:CPAR2_108340:CPAR2_108370:CPAR2_109920:CPAR2_200830:FCY23:CPAR2_203150:CPAR2_203720:CPAR2_206870:CPAR2_209780:CPAR2_210150:CPAR2_210740:CPAR2_212620:CPAR2_212850:CPAR2_300730:CPAR2_301390:HIP1:CPAR2_400790:CPAR2_401360:CPAR2_401450:CPAR2_402040:CPAR2_402410:C…	15182:4008:15123:7:5313:42937:15169:297:15293:15203:15204:15191:5355:5216:5290:15606:22891:35673:97079:46872:15238:15079:5415:15665:22890:15200:71916:15398:10174:166:15212:34257:51183:15193:15181:15355:8519:15489:15188:319:15183:5469:15129:15572:5385:15663:15295:5427:15185:1406:15205:15189:15171:1901584:5310
46943	carboxylic acid transmembrane transporter activity	21 out of 669 genes, 3.1%	71 out of 5984 background genes, 1.2%	0.00574	0	CPAR2_100560:SFC1:CPAR2_103130:CPAR2_104450:CPAR2_106670:CPAR2_106680:CPAR2_106690:CPAR2_106700:CPAR2_108060:CPAR2_200830:CPAR2_203150:CPAR2_212620:HIP1:CPAR2_401360:CPAR2_402040:CPAR2_403640:CPAR2_403820:GAP2:CPAR2_603080:CPAR2_801820:CPAR2_808410	15182:15123:5313:15203:15191:5290:97079:15193:15181:15355:8519:15188:15183:5469:15129:15185:15189:15171:5310
5342	organic acid transmembrane transporter activity	21 out of 669 genes, 3.1%	72 out of 5984 background genes, 1.2%	0.00727	0	CPAR2_100560:SFC1:CPAR2_103130:CPAR2_104450:CPAR2_106670:CPAR2_106680:CPAR2_106690:CPAR2_106700:CPAR2_108060:CPAR2_200830:CPAR2_203150:CPAR2_212620:HIP1:CPAR2_401360:CPAR2_402040:CPAR2_403640:CPAR2_403820:GAP2:CPAR2_603080:CPAR2_801820:CPAR2_808410	15182:15123:5313:15203:15191:5290:97079:15193:15181:15355:8519:15188:15183:5469:15129:15185:15189:15171:5310
8514	organic anion transmembrane transporter activity	23 out of 669 genes, 3.4%	84 out of 5984 background genes, 1.4%	0.0093	0	TNA1:CPAR2_100560:SFC1:CPAR2_103130:CPAR2_104450:CPAR2_106670:CPAR2_106680:CPAR2_106690:CPAR2_106700:CPAR2_108060:CPAR2_200830:CPAR2_203150:CPAR2_212620:HIP1:CPAR2_401360:CPAR2_402040:CPAR2_403640:CPAR2_403820:CPAR2_407640:GAP2:CPAR2_603080:CPAR2_801820:CPAR2_808410	15182:15123:5313:15169:15203:15191:5290:97079:15193:15181:15355:8519:15188:15183:5469:15129:15663:15185:1406:15189:15171:5310
22892	substrate-specific transporter activity	61 out of 669 genes, 9.1%	333 out of 5984 background genes, 5.6%	0.01511	0.0022	TNA1:CPAR2_100560:SFC1:CPAR2_103130:CPAR2_104450:CPAR2_105530:CPAR2_106670:CPAR2_106680:CPAR2_106690:CPAR2_106700:CPAR2_107390:CPAR2_108060:CPAR2_108230:CPAR2_108340:CPAR2_108370:CPAR2_109920:CPAR2_200830:FCY23:CPAR2_203150:CPAR2_203720:CPAR2_206870:CPAR2_209780:CPAR2_210150:CPAR2_210740:CPAR2_212620:CPAR2_212850:CPAR2_300730:CPAR2_301380:CPAR2_301390:HIP1:CPAR2_400790:CPAR2_401360:CPAR2_401450:C…	15182:4008:15123:7:5313:42937:15169:297:15293:15203:15204:15191:5355:5216:42936:5290:15606:22891:8565:35673:5548:97079:46872:15238:15079:5415:15665:5524:22890:42626:15200:71916:8536:4012:15398:10174:166:15212:34257:51183:15193:15181:15355:8559:8519:15489:15244:8139:15188:319:15183:5469:15129:15572:5385:8144:15663:8526:15295:5427:15185:1406:15205:15189:15171:1901584:5310
30515	snoRNA binding	10 out of 669 genes, 1.5%	22 out of 5984 background genes, 0.4%	0.01651	0.002	CPAR2_101190:CPAR2_202230:CPAR2_203130:CPAR2_203250:CPAR2_210520:CPAR2_700350:CPAR2_701770:CPAR2_703340:CPAR2_803700:CPAR2_803990	30515:19843:43047:42134:34511:3723
20037	heme binding	14 out of 669 genes, 2.1%	40 out of 5984 background genes, 0.7%	0.01881	0.0018	CPAR2_104080:CPAR2_105070:CPAR2_201540:CPAR2_202280:CPAR2_203780:CPAR2_204220:CPAR2_206990:CPAR2_207780:CPAR2_210420:ERG11:CPAR2_500730:CPAR2_503950:CPAR2_600870:CPAR2_803850	5506:18685:4096:20037:8047:16712:9055:8398:104:8144:19825:80132:16156
46906	tetrapyrrole binding	14 out of 669 genes, 2.1%	40 out of 5984 background genes, 0.7%	0.01881	0.0017	CPAR2_104080:CPAR2_105070:CPAR2_201540:CPAR2_202280:CPAR2_203780:CPAR2_204220:CPAR2_206990:CPAR2_207780:CPAR2_210420:ERG11:CPAR2_500730:CPAR2_503950:CPAR2_600870:CPAR2_803850	5506:18685:4096:20037:8047:16712:9055:8398:104:8144:19825:80132:16156
15171	amino acid transmembrane transporter activity	17 out of 669 genes, 2.5%	55 out of 5984 background genes, 0.9%	0.01935	0.0015	CPAR2_100560:CPAR2_103130:CPAR2_106670:CPAR2_106680:CPAR2_106690:CPAR2_106700:CPAR2_108060:CPAR2_200830:CPAR2_203150:CPAR2_212620:HIP1:CPAR2_401360:CPAR2_403640:CPAR2_403820:GAP2:CPAR2_603080:CPAR2_801820	15182:5313:15203:15191:5290:15193:15181:15188:15183:15185:15189:15171
5215	transporter activity	69 out of 669 genes, 10.3%	393 out of 5984 background genes, 6.6%	0.01968	0.0014	TNA1:CPAR2_100560:SFC1:CPAR2_103130:CPAR2_104450:CPAR2_105530:CPAR2_106670:CPAR2_106680:CPAR2_106690:CPAR2_106700:CPAR2_107390:CPAR2_108060:CPAR2_108230:CPAR2_108340:CPAR2_108370:CPAR2_109920:CPAR2_200830:FCY23:CPAR2_202130:CPAR2_203150:CPAR2_203720:CPAR2_206870:MLT1:CPAR2_209780:CPAR2_210150:CPAR2_210740:CPAR2_212620:CPAR2_212850:CPAR2_300730:CPAR2_301380:CPAR2_301390:HIP1:CPAR2_400100:CPAR2_400…	15182:4008:15123:7:5313:42937:15169:297:15293:15203:15204:15191:5355:5216:42936:5290:15606:5215:22891:8565:15297:35673:5548:97079:46872:15238:15079:5415:15665:5524:22890:42626:15200:71916:8536:4012:15398:10174:166:15212:34257:51183:15193:15181:15355:8559:8519:15489:15244:8139:15188:319:15183:5469:15129:15572:5385:8144:15663:8526:15295:5427:15185:1406:15205:15189:15171:1901584:5310
8509	anion transmembrane transporter activity	25 out of 669 genes, 3.7%	101 out of 5984 background genes, 1.7%	0.02675	0.0013	TNA1:CPAR2_100560:SFC1:CPAR2_103130:CPAR2_104450:CPAR2_106670:CPAR2_106680:CPAR2_106690:CPAR2_106700:CPAR2_108060:CPAR2_200830:CPAR2_203150:CPAR2_212620:HIP1:CPAR2_401360:CPAR2_402040:CPAR2_402870:CPAR2_403640:CPAR2_403820:CPAR2_407640:GAP2:CPAR2_603080:CPAR2_701220:CPAR2_801820:CPAR2_808410	15182:15123:5313:15169:15203:15191:5290:97079:15200:15398:15193:15181:15355:8519:15188:319:15183:5469:15129:15663:15185:1406:15189:15171:5310
16705	oxidoreductase activity, acting on paired donors, with incorporation or reduction of molecular oxygen	16 out of 669 genes, 2.4%	56 out of 5984 background genes, 0.9%	0.08828	0.01	CPAR2_101360:MNX1:CPAR2_104530:CPAR2_105690:CPAR2_201040:CPAR2_203780:CPAR2_204220:CPAR2_206990:CPAR2_210480:ERG11:CPAR2_402640:CPAR2_503950:CPAR2_600870:CPAR2_703500:MNX2:CPAR2_804110	31418:5506:8270:18678:4506:8379:18685:50353:20037:50660:4392:51864:16712:35064:9055:8398:8336:8144:19825:18669:16706
Cellular Component
30684	preribosome	37 out of 669 genes, 5.5%	140 out of 5984 background genes, 2.3%	5.93e-05	0	CPAR2_101190:CPAR2_101430:CPAR2_105010:CPAR2_107130:CPAR2_110040:CPAR2_200430:CPAR2_201600:CPAR2_202100:CPAR2_203130:CPAR2_203250:CPAR2_204570:CPAR2_204650:CPAR2_205890:CPAR2_206510:CPAR2_210520:CPAR2_210920:CPAR2_212540:CPAR2_300300:CPAR2_300820:CPAR2_301670:CPAR2_302060:CPAR2_404000:CPAR2_405940:CPAR2_406360:CPAR2_503340:CPAR2_600040:CPAR2_600560:CPAR2_603240:CPAR2_700350:CPAR2_700790:CPAR2_700…	5737:5829:33553:502:5840:5654:32040:5783:5739:30692:70545:34388:5635:34457:30687:30684:15934:30688:228:5819:31428:5730:5634:32153:30691:44732:30686:34455:34399:30690
30686	90S preribosome	25 out of 669 genes, 3.7%	81 out of 5984 background genes, 1.4%	0.00023	0	CPAR2_101190:CPAR2_101430:CPAR2_105010:CPAR2_107130:CPAR2_200430:CPAR2_201600:CPAR2_202100:CPAR2_203130:CPAR2_204570:CPAR2_204650:CPAR2_205890:CPAR2_210520:CPAR2_210920:CPAR2_300300:CPAR2_300820:CPAR2_301670:CPAR2_302060:CPAR2_404000:CPAR2_405940:CPAR2_406360:CPAR2_503340:CPAR2_700350:CPAR2_703340:CPAR2_803700:CPAR2_803990	5737:5829:33553:5840:32040:5783:5739:30692:70545:34388:5635:34457:30687:15934:30688:228:31428:5819:5730:32153:30691:44732:30686:34455:30690
5730	nucleolus	54 out of 669 genes, 8.1%	279 out of 5984 background genes, 4.7%	0.00535	0	CPAR2_101190:CPAR2_101430:CPAR2_101450:CPAR2_103920:CPAR2_105010:CPAR2_107130:CPAR2_109610:CPAR2_110040:CPAR2_200430:CPAR2_201600:CPAR2_202100:CPAR2_203130:CPAR2_203250:CPAR2_204570:CPAR2_204650:CPAR2_205890:CPAR2_206510:CPAR2_206590:CPAR2_207510:CPAR2_208860:CPAR2_210160:CPAR2_210170:CPAR2_210520:CPAR2_210920:CPAR2_211150:CPAR2_212540:CPAR2_300300:CPAR2_300390:CPAR2_300700:CPAR2_300820:CPAR2_301…	5737:5829:33553:502:5840:5654:32040:5783:5739:30692:5736:70545:34388:5635:34457:30687:30684:15934:31429:30688:228:31428:5819:5730:32153:30691:44732:30686:34455:34399:30690
34388	Pwp2p-containing subcomplex of 90S preribosome	5 out of 669 genes, 0.7%	6 out of 5984 background genes, 0.1%	0.01792	0	CPAR2_101190:CPAR2_210520:CPAR2_210920:CPAR2_300820:CPAR2_803990	5829:32040:34388:32153:44732
30687	preribosome, large subunit precursor	15 out of 669 genes, 2.2%	50 out of 5984 background genes, 0.8%	0.04593	0.008	CPAR2_101430:CPAR2_107130:CPAR2_110040:CPAR2_204570:CPAR2_206510:CPAR2_212540:CPAR2_301670:CPAR2_405940:CPAR2_600040:CPAR2_600560:CPAR2_603240:CPAR2_700790:CPAR2_700820:CPAR2_802080:CPAR2_808540	5829:502:5654:5739:70545:5635:30687:15934:30688:5730:5634:32153:30691:44732:30686:34399:30690
Results for CZF1 KO (upregulated genes)
GOID	GO_term	Cluster frequency	Background frequency	Corrected P-value	False discovery rate	Gene(s) annotated to the term	Directly Annotated GOID List
Biological Process
6826	iron ion transport	8 out of 319 genes, 2.5%	14 out of 5984 background genes, 0.2%	0.0001	0	CPAR2_210100:CPAR2_213200:CPAR2_300620:CPAR2_301500:FRP1:CPAR2_602990:FET3:FTR1	44117:55114:33212:44182:70627:6826:1516:15677:33215:1900461:6897:6827:6879:45732:9405:35690:6878:10106
34755	iron ion transmembrane transport	6 out of 319 genes, 1.9%	7 out of 5984 background genes, 0.1%	0.00011	0	CPAR2_210100:CPAR2_301500:FRP1:CPAR2_602990:FET3:FTR1	44117:55114:33212:44182:70627:1516:15677:33215:1900461:6897:6827:45732:9405:35690:6878:10106
6827	high-affinity iron ion transport	6 out of 319 genes, 1.9%	7 out of 5984 background genes, 0.1%	0.00011	0	CPAR2_210100:CPAR2_301500:FRP1:CPAR2_602990:FET3:FTR1	44117:55114:33212:44182:70627:1516:15677:33215:1900461:6897:6827:45732:9405:35690:6878:10106
55114	oxidation-reduction process	44 out of 319 genes, 13.8%	405 out of 5984 background genes, 6.8%	0.00254	0	CPAR2_100440:CPAR2_103450:CPAR2_105550:CPAR2_108460:CPAR2_110150:CPAR2_203440:CPAR2_203600:CPAR2_206680:OLE1:COX4:CPAR2_209870:CPAR2_209880:CPAR2_210130:CPAR2_210140:CPAR2_210480:CPAR2_210630:CPAR2_213080:CPAR2_300130:CPAR2_300620:CPAR2_300630:CPAR2_303330:ERG11:CPAR2_400970:CPAR2_401730:FRP1:CPAR2_403430:CPAR2_404240:CPAR2_405900:CPAR2_500330:SCR3:SOU2:CPAR2_602410:CPAR2_603590:FET3:AOX2:CPAR2_7…	9060:1410:30448:36178:71210:6636:12501:44262:15677:33215:30447:6801:7623:45454:6882:6116:6123:10106:55114:71216:6744:16558:6094:70627:71472:36187:34389:6827:51668:90002:1766:6915:36244:30437:6461:45333:10230:6783:30148:36180:6112:1516:71451:19430:6696:16117:52059:71214:7124:9267:44011:6826:43153:22904:71585:71276:6675:36171:34613:70301:36170:6108:35690:9405:6633:71456
16129	phytosteroid biosynthetic process	9 out of 319 genes, 2.8%	26 out of 5984 background genes, 0.4%	0.00346	0.004	CPAR2_105550:CPAR2_201490:UPC2:CPAR2_210480:ERG11:CPAR2_405010:CPAR2_405900:CPAR2_406760:CPAR2_703970	71210:55114:71216:7163:36187:51668:90002:1766:35961:45892:36180:6696:8610:35969:9267:36171:36170:35690:9405:6633:71456
44108	cellular alcohol biosynthetic process	9 out of 319 genes, 2.8%	26 out of 5984 background genes, 0.4%	0.00346	0.0033	CPAR2_105550:CPAR2_201490:UPC2:CPAR2_210480:ERG11:CPAR2_405010:CPAR2_405900:CPAR2_406760:CPAR2_703970	71210:55114:71216:7163:36187:51668:90002:1766:35961:45892:36180:6696:8610:35969:9267:36171:36170:35690:9405:6633:71456
6696	ergosterol biosynthetic process	9 out of 319 genes, 2.8%	26 out of 5984 background genes, 0.4%	0.00346	0.0029	CPAR2_105550:CPAR2_201490:UPC2:CPAR2_210480:ERG11:CPAR2_405010:CPAR2_405900:CPAR2_406760:CPAR2_703970	71210:55114:71216:7163:36187:51668:90002:1766:35961:45892:36180:6696:8610:35969:9267:36171:36170:35690:9405:6633:71456
41	transition metal ion transport	10 out of 319 genes, 3.1%	33 out of 5984 background genes, 0.6%	0.00396	0.0025	CPAR2_205460:CPAR2_210100:CPAR2_213200:CPAR2_300620:CPAR2_301500:CPAR2_303120:FRP1:CPAR2_602990:FET3:FTR1	15677:33215:34759:10106:55114:33212:70627:6827:45732:6825:44117:44182:43324:1516:1900461:34599:6826:6897:60003:6879:9405:35690:6878
33212	iron assimilation	6 out of 319 genes, 1.9%	11 out of 5984 background genes, 0.2%	0.00644	0.0044	CPAR2_209090:CPAR2_300130:CPAR2_301500:FRP1:CPAR2_407560:FTR1	71469:33215:55085:10106:55114:33212:6827:90375:45732:44117:44182:1900461:34757:42928:35690:9405:6878
16128	phytosteroid metabolic process	9 out of 319 genes, 2.8%	28 out of 5984 background genes, 0.5%	0.00696	0.004	CPAR2_105550:CPAR2_201490:UPC2:CPAR2_210480:ERG11:CPAR2_405010:CPAR2_405900:CPAR2_406760:CPAR2_703970	71210:55114:71216:7163:36187:51668:90002:1766:35961:45892:36180:6696:8610:35969:9267:36171:36170:35690:9405:6633:71456
8204	ergosterol metabolic process	9 out of 319 genes, 2.8%	28 out of 5984 background genes, 0.5%	0.00696	0.0036	CPAR2_105550:CPAR2_201490:UPC2:CPAR2_210480:ERG11:CPAR2_405010:CPAR2_405900:CPAR2_406760:CPAR2_703970	71210:55114:71216:7163:36187:51668:90002:1766:35961:45892:36180:6696:8610:35969:9267:36171:36170:35690:9405:6633:71456
16126	sterol biosynthetic process	9 out of 319 genes, 2.8%	29 out of 5984 background genes, 0.5%	0.00963	0.0067	CPAR2_105550:CPAR2_201490:UPC2:CPAR2_210480:ERG11:CPAR2_405010:CPAR2_405900:CPAR2_406760:CPAR2_703970	71210:55114:71216:7163:36187:51668:90002:1766:35961:45892:36180:6696:8610:35969:9267:36171:36170:35690:9405:6633:71456
6694	steroid biosynthetic process	9 out of 319 genes, 2.8%	29 out of 5984 background genes, 0.5%	0.00963	0.0062	CPAR2_105550:CPAR2_201490:UPC2:CPAR2_210480:ERG11:CPAR2_405010:CPAR2_405900:CPAR2_406760:CPAR2_703970	71210:55114:71216:7163:36187:51668:90002:1766:35961:45892:36180:6696:8610:35969:9267:36171:36170:35690:9405:6633:71456
6879	cellular iron ion homeostasis	10 out of 319 genes, 3.1%	37 out of 5984 background genes, 0.6%	0.01233	0.0071	CPAR2_205460:CPAR2_209090:CPAR2_213200:CPAR2_300120:CPAR2_300130:CPAR2_301500:CPAR2_303120:FRP1:CPAR2_407560:FTR1	71469:33215:55085:34759:10106:55114:33212:6827:90375:45732:6825:44117:44182:43324:1900461:34757:34599:44011:6826:42928:60003:6879:35690:9405:6878
55072	iron ion homeostasis	10 out of 319 genes, 3.1%	38 out of 5984 background genes, 0.6%	0.01596	0.0107	CPAR2_205460:CPAR2_209090:CPAR2_213200:CPAR2_300120:CPAR2_300130:CPAR2_301500:CPAR2_303120:FRP1:CPAR2_407560:FTR1	71469:33215:55085:34759:10106:55114:33212:6827:90375:45732:6825:44117:44182:43324:1900461:34757:34599:44011:6826:42928:60003:6879:35690:9405:6878
44107	cellular alcohol metabolic process	9 out of 319 genes, 2.8%	31 out of 5984 background genes, 0.5%	0.01763	0.0112	CPAR2_105550:CPAR2_201490:UPC2:CPAR2_210480:ERG11:CPAR2_405010:CPAR2_405900:CPAR2_406760:CPAR2_703970	71210:55114:71216:7163:36187:51668:90002:1766:35961:45892:36180:6696:8610:35969:9267:36171:36170:35690:9405:6633:71456
6812	cation transport	19 out of 319 genes, 6.0%	136 out of 5984 background genes, 2.3%	0.07548	0.0318	CPAR2_200290:CPAR2_201840:CPAR2_202900:CPAR2_205460:CPAR2_210100:CPAR2_212610:CPAR2_213170:CPAR2_213200:CPAR2_300620:CPAR2_301500:CPAR2_303120:FRP1:CPAR2_600210:CPAR2_602480:CPAR2_602990:FET3:FTR1:CPAR2_700780:TPO3	32:15677:33215:55085:35786:15986:34759:10106:55114:33212:7035:70627:6827:45732:6825:15991:42407:6461:44117:44182:43324:1516:1900461:6812:34599:30001:6826:6897:33615:60003:6879:296:9405:35690:33617:6878
46916	cellular transition metal ion homeostasis	12 out of 319 genes, 3.8%	63 out of 5984 background genes, 1.1%	0.07804	0.03	CPAR2_205460:CPAR2_209090:CPAR2_213200:CPAR2_300120:CPAR2_300130:CPAR2_301500:CPAR2_303120:CPAR2_401370:FRP1:CPAR2_407560:CPAR2_500330:FTR1	71469:33215:7623:55085:45454:34759:6882:10106:55114:33212:6827:90375:45732:6825:44117:44182:43324:19430:1900461:16117:34757:34599:44011:6826:42928:43153:60003:6879:35690:9405:6878
16125	sterol metabolic process	9 out of 319 genes, 2.8%	37 out of 5984 background genes, 0.6%	0.08189	0.0316	CPAR2_105550:CPAR2_201490:UPC2:CPAR2_210480:ERG11:CPAR2_405010:CPAR2_405900:CPAR2_406760:CPAR2_703970	71210:55114:71216:7163:36187:51668:90002:1766:35961:45892:36180:6696:8610:35969:9267:36171:36170:35690:9405:6633:71456
8202	steroid metabolic process	9 out of 319 genes, 2.8%	37 out of 5984 background genes, 0.6%	0.08189	0.03	CPAR2_105550:CPAR2_201490:UPC2:CPAR2_210480:ERG11:CPAR2_405010:CPAR2_405900:CPAR2_406760:CPAR2_703970	71210:55114:71216:7163:36187:51668:90002:1766:35961:45892:36180:6696:8610:35969:9267:36171:36170:35690:9405:6633:71456
55076	transition metal ion homeostasis	12 out of 319 genes, 3.8%	64 out of 5984 background genes, 1.1%	0.09154	0.0305	CPAR2_205460:CPAR2_209090:CPAR2_213200:CPAR2_300120:CPAR2_300130:CPAR2_301500:CPAR2_303120:CPAR2_401370:FRP1:CPAR2_407560:CPAR2_500330:FTR1	71469:33215:7623:55085:45454:34759:6882:10106:55114:33212:6827:90375:45732:6825:44117:44182:43324:19430:1900461:16117:34757:34599:44011:6826:42928:43153:60003:6879:35690:9405:6878
Molecular Function
5507	copper ion binding	7 out of 319 genes, 2.2%	16 out of 5984 background genes, 0.3%	0.00177	0	CPAR2_202900:CPAR2_205460:CPAR2_301500:CPAR2_303120:CPAR2_401730:CPAR2_603590:FET3	1159:16531:5507:166:1077:4322:19829:16491
16491	oxidoreductase activity	43 out of 319 genes, 13.5%	412 out of 5984 background genes, 6.9%	0.00241	0	CPAR2_103450:CPAR2_105550:CPAR2_107920:CPAR2_108460:CPAR2_110150:CPAR2_201550:CPAR2_203440:OLE1:COX4:CPAR2_209870:CPAR2_209880:CPAR2_210130:CPAR2_210140:CPAR2_210480:CPAR2_210630:CPAR2_213080:CPAR2_300130:CPAR2_300620:CPAR2_300630:CPAR2_303330:ERG11:CPAR2_400970:FRP1:CPAR2_403430:CPAR2_405900:CPAR2_500330:SCR3:SOU2:CPAR2_600370:CPAR2_602410:CPAR2_603590:FET3:AOX2:CPAR2_702750:CPAR2_703970:CPAR2_8…	50613:170:50660:51287:5506:8270:5507:4090:4768:16616:4506:3959:16641:16491:16747:249:9055:3677:46914:4322:4129:8398:51920:8177:8144:4497:32542:9916:16651:46872:4784:10181:4109:248:30060:4375:8137:20037:293
31386	protein tag	4 out of 319 genes, 1.3%	8 out of 5984 background genes, 0.1%	0.09633	0.0333	CPAR2_102660:CPAR2_207880:CPAR2_209130:CPAR2_403050	31386
Cellular Component
5743	mitochondrial inner membrane	23 out of 319 genes, 7.2%	158 out of 5984 background genes, 2.6%	0.00176	0.02	CPAR2_104030:CPAR2_105820:CPAR2_108530:CPAR2_200290:CPAR2_201840:CPAR2_206680:COX4:CPAR2_209870:CPAR2_209880:CPAR2_213170:CPAR2_303070:CPAR2_303330:CPAR2_400600:CPAR2_401240:CPAR2_401730:CPAR2_401760:CPAR2_500070:CPAR2_503820:CPAR2_600210:CPAR2_600370:CPAR2_700590:CPAR2_700780:CPAR2_800850	1405:44284:5829:276:5758:5744:42645:42653:275:5886:5756:5743:31305:42719:5634:31314:97249:5751:42721:5761
44455	mitochondrial membrane part	21 out of 319 genes, 6.6%	137 out of 5984 background genes, 2.3%	0.00193	0.01	CPAR2_104030:CPAR2_105820:CPAR2_200290:CPAR2_201840:CPAR2_205840:CPAR2_206680:COX4:CPAR2_209870:CPAR2_209880:CPAR2_213170:CPAR2_303070:CPAR2_400600:CPAR2_401240:CPAR2_401760:CPAR2_500070:CPAR2_503820:CPAR2_600210:CPAR2_600370:CPAR2_700590:CPAR2_700780:CPAR2_808490	1405:44284:5829:276:5758:5744:42645:42653:275:5886:5756:31305:42719:5634:31314:97249:5751:42721:32592:31307
19866	organelle inner membrane	23 out of 319 genes, 7.2%	165 out of 5984 background genes, 2.8%	0.00365	0.0067	CPAR2_104030:CPAR2_105820:CPAR2_108530:CPAR2_200290:CPAR2_201840:CPAR2_206680:COX4:CPAR2_209870:CPAR2_209880:CPAR2_213170:CPAR2_303070:CPAR2_303330:CPAR2_400600:CPAR2_401240:CPAR2_401730:CPAR2_401760:CPAR2_500070:CPAR2_503820:CPAR2_600210:CPAR2_600370:CPAR2_700590:CPAR2_700780:CPAR2_800850	1405:44284:5829:276:5758:5744:42645:42653:275:5886:5756:5743:31305:42719:5634:31314:97249:5751:42721:5761
5740	mitochondrial envelope	34 out of 319 genes, 10.7%	305 out of 5984 background genes, 5.1%	0.00549	0.005	CPAR2_100440:CPAR2_104030:CPAR2_105820:CPAR2_108460:CPAR2_108530:CPAR2_200290:CPAR2_201840:CPAR2_202900:CPAR2_205840:CPAR2_206680:COX4:CPAR2_209870:CPAR2_209880:CPAR2_213170:CPAR2_300140:CPAR2_303070:CPAR2_303330:CPAR2_400600:CPAR2_401240:CPAR2_401730:CPAR2_401760:CPAR2_405010:CPAR2_406760:CPAR2_500070:CPAR2_503120:CPAR2_503820:CPAR2_600210:CPAR2_600370:CPAR2_700590:CPAR2_700780:CPAR2_702500:CPAR…	1405:44284:5829:276:5744:5758:5789:5783:5777:5739:42645:42653:275:16021:5886:5756:5743:31305:42719:5740:5634:5811:31314:97249:5751:42721:32592:5741:5761:31307
31966	mitochondrial membrane	30 out of 319 genes, 9.4%	260 out of 5984 background genes, 4.3%	0.00875	0.004	CPAR2_104030:CPAR2_105820:CPAR2_108530:CPAR2_200290:CPAR2_201840:CPAR2_205840:CPAR2_206680:COX4:CPAR2_209870:CPAR2_209880:CPAR2_213170:CPAR2_300140:CPAR2_303070:CPAR2_303330:CPAR2_400600:CPAR2_401240:CPAR2_401730:CPAR2_401760:CPAR2_405010:CPAR2_406760:CPAR2_500070:CPAR2_503820:CPAR2_600210:CPAR2_600370:CPAR2_700590:CPAR2_700780:CPAR2_702500:CPAR2_800850:CPAR2_801770:CPAR2_808490	1405:44284:5829:276:5758:5744:5789:5783:5777:42645:42653:275:16021:5886:5756:5743:31305:42719:5634:5811:31314:97249:5751:42721:32592:5741:5761:31307
45277	respiratory chain complex IV	5 out of 319 genes, 1.6%	10 out of 5984 background genes, 0.2%	0.0171	0.01	COX4:CPAR2_209870:CPAR2_209880:CPAR2_303070:CPAR2_600370	5829:5758:42645:5886:31305:5634:97249:5751
5751	mitochondrial respiratory chain complex IV	5 out of 319 genes, 1.6%	10 out of 5984 background genes, 0.2%	0.0171	0.0086	COX4:CPAR2_209870:CPAR2_209880:CPAR2_303070:CPAR2_600370	5829:5758:42645:5886:31305:5634:97249:5751
44429	mitochondrial part	41 out of 319 genes, 12.9%	435 out of 5984 background genes, 7.3%	0.04025	0.0125	CPAR2_100440:CPAR2_104030:CPAR2_105820:CPAR2_108460:CPAR2_108530:CPAR2_200290:CPAR2_201840:CPAR2_202900:CPAR2_203600:CPAR2_205840:CPAR2_206680:COX4:CPAR2_209870:CPAR2_209880:CPAR2_213170:CPAR2_300140:CPAR2_302470:CPAR2_302710:CPAR2_303070:CPAR2_303330:CPAR2_304090:CPAR2_400600:CPAR2_401240:CPAR2_401730:CPAR2_401760:CPAR2_405010:CPAR2_406760:CPAR2_500070:CPAR2_503120:CPAR2_503820:CPAR2_503970:CPAR…	5763:276:5744:5789:42645:5762:16021:5759:5886:5756:42719:5811:97249:5761:31307:1405:5829:44284:5758:5739:5777:5783:42653:275:5743:31305:5740:5634:5751:31314:42721:32592:5741
Results for CZF1 KO (downregulated genes)
GOID	GO_term	Cluster frequency	Background frequency	Corrected P-value	False discovery rate	Gene(s) annotated to the term	Directly Annotated GOID List
Biological Process
55085	transmembrane transport	53 out of 373 genes, 14.2%	408 out of 5984 background genes, 6.8%	0.0001	0	CPAR2_100330:CPAR2_101860:CPAR2_103130:CPAR2_105760:CPAR2_106080:CPAR2_106680:CPAR2_106690:CPAR2_108060:CPAR2_108340:CPAR2_200830:CPAR2_202130:CPAR2_206870:MLT1:CPAR2_207540:CPAR2_209680:CPAR2_209690:CPAR2_212620:CPAR2_212850:CPAR2_300590:CPAR2_300670:CPAR2_300680:CPAR2_301390:CPAR2_301640:MDR1:CPAR2_400160:CPAR2_400790:CPAR2_401360:CPAR2_401450:CPAR2_402040:CPAR2_403820:CDR1:CPAR2_406250:CPAR2_4…	71383:6457:30448:36180:43200:71248:70778:1902274:19740:6813:15802:35879:35672:15813:44690:6835:6849:15824:55085:19631:15903:46618:32974:51454:6863:34599:15861:71216:9267:72530:6808:71805:15848:6855:1902269:15812:6995:3333:15809:97080:15893:15846:6865:45332:15764:36170:6814:35690:70588:45041:9405:15856
3333	amino acid transmembrane transport	13 out of 373 genes, 3.5%	53 out of 5984 background genes, 0.9%	0.01125	0.04	CPAR2_101860:CPAR2_103130:CPAR2_106680:CPAR2_106690:CPAR2_108060:CPAR2_200830:CPAR2_212620:CPAR2_401360:CPAR2_403820:GAP2:CPAR2_603080:CPAR2_603530:CPAR2_804540	43200:70778:1902274:15802:15813:44690:15824:55085:32974:6808:1902269:15812:6995:3333:6865:15846:35690
15849	organic acid transport	17 out of 373 genes, 4.6%	86 out of 5984 background genes, 1.4%	0.01268	0.04	CPAR2_101860:CPAR2_103130:CPAR2_106680:CPAR2_106690:CPAR2_108060:CPAR2_200830:CPAR2_212620:CPAR2_301640:CPAR2_401360:CPAR2_402040:CPAR2_403820:GAP2:CPAR2_603080:CPAR2_603530:ACB1:CPAR2_804540:CPAR2_808410	43200:70778:1902274:15802:35879:15813:44690:6835:6849:15824:55085:32974:6808:1902269:15812:6995:15809:3333:97080:15909:6865:15846:35690:1300
46942	carboxylic acid transport	17 out of 373 genes, 4.6%	86 out of 5984 background genes, 1.4%	0.01268	0.03	CPAR2_101860:CPAR2_103130:CPAR2_106680:CPAR2_106690:CPAR2_108060:CPAR2_200830:CPAR2_212620:CPAR2_301640:CPAR2_401360:CPAR2_402040:CPAR2_403820:GAP2:CPAR2_603080:CPAR2_603530:ACB1:CPAR2_804540:CPAR2_808410	43200:70778:1902274:15802:35879:15813:44690:6835:6849:15824:55085:32974:6808:1902269:15812:6995:15809:3333:97080:15909:6865:15846:35690:1300
15711	organic anion transport	20 out of 373 genes, 5.4%	116 out of 5984 background genes, 1.9%	0.01954	0.028	CPAR2_101860:CPAR2_103130:CPAR2_106680:CPAR2_106690:CPAR2_108060:CPAR2_200830:CPAR2_212620:CPAR2_301640:CPAR2_401360:CPAR2_402040:CPAR2_403600:CPAR2_403820:CDR1:GAP2:CPAR2_600610:CPAR2_603080:CPAR2_603530:ACB1:CPAR2_804540:CPAR2_808410	71383:43200:2001247:70778:1902274:15802:35879:15813:44690:6835:6849:46488:15824:55085:43001:15903:1901352:45717:46618:32974:34599:15914:6808:6855:1902269:15812:6995:15809:3333:97080:15909:45332:6865:15846:35690:1300
6865	amino acid transport	14 out of 373 genes, 3.8%	65 out of 5984 background genes, 1.1%	0.02597	0.03	CPAR2_101860:CPAR2_103130:CPAR2_106680:CPAR2_106690:CPAR2_108060:CPAR2_200830:CPAR2_212620:CPAR2_301640:CPAR2_401360:CPAR2_403820:GAP2:CPAR2_603080:CPAR2_603530:CPAR2_804540	43200:70778:1902274:15802:15813:44690:15824:55085:32974:6808:1902269:15812:6995:15809:3333:6865:15846:35690
15893	drug transport	6 out of 373 genes, 1.6%	12 out of 5984 background genes, 0.2%	0.02854	0.0286	CPAR2_202130:CPAR2_209780:MDR1:CPAR2_403600:CDR1:CPAR2_806580	71383:15903:46618:6863:34599:15861:72530:6855:15862:15893:45332:9405:35690:15856
7018	microtubule-based movement	7 out of 373 genes, 1.9%	20 out of 5984 background genes, 0.3%	0.09965	0.0525	CPAR2_105880:CPAR2_203010:CPAR2_204850:CPAR2_214070:CPAR2_405870:CPAR2_407060:CPAR2_807050	743:7019:70:31534:43935:70462:30473:36180:31122:7018:6184:7126:48315:92:51228:7052:48288:30472:71216:9267:2000582:51258:30541:48312:30474:742:10570:51292:34613:36170:40001:7026:35690:132:73:36166:7064:71963
Molecular Function
3777	microtubule motor activity	6 out of 373 genes, 1.6%	8 out of 5984 background genes, 0.1%	0.00029	0	CPAR2_203010:CPAR2_204850:CPAR2_214070:CPAR2_405870:CPAR2_407060:CPAR2_807050	8569:51010:5524:5200:46982:70463:3777:8017:8574
22857	transmembrane transporter activity	40 out of 373 genes, 10.7%	309 out of 5984 background genes, 5.2%	0.00122	0	CPAR2_103130:CPAR2_105760:CPAR2_106680:CPAR2_106690:CPAR2_108060:CPAR2_108340:CPAR2_200830:CPAR2_202130:CPAR2_203720:CPAR2_206870:MLT1:CPAR2_209780:CPAR2_212620:CPAR2_212850:CPAR2_301390:MDR1:CPAR2_400790:CPAR2_401360:CPAR2_401450:CPAR2_402040:CPAR2_403600:CPAR2_403820:CDR1:CPAR2_407200:CPAR2_501010:CPAR2_502100:GAP2:CPAR2_503880:CPAR2_504080:CPAR2_600460:CPAR2_601050:CPAR2_603080:CPAR2_603530:CP…	4008:5313:4012:10174:166:15212:15193:15181:15355:8559:15293:15203:8554:15191:15244:15105:5290:15188:15250:15606:5345:15183:22891:15297:15129:8508:35673:15572:8144:5548:97079:46872:15238:15079:15185:15205:5415:15186:5524:15189:15171:5302:15104:8556:42626:5310
15179	L-amino acid transmembrane transporter activity	7 out of 373 genes, 1.9%	15 out of 5984 background genes, 0.3%	0.00299	0	CPAR2_103130:CPAR2_106690:CPAR2_403820:GAP2:CPAR2_603080:CPAR2_603530:CPAR2_804540	5313:15193:15181:15203:15191:5290:15188:15183:15186:15189:5302
3774	motor activity	6 out of 373 genes, 1.6%	11 out of 5984 background genes, 0.2%	0.00414	0	CPAR2_203010:CPAR2_204850:CPAR2_214070:CPAR2_405870:CPAR2_407060:CPAR2_807050	51010:5200:3777:8574:8569:5524:70463:46982:8017
46943	carboxylic acid transmembrane transporter activity	15 out of 373 genes, 4.0%	71 out of 5984 background genes, 1.2%	0.00479	0	CPAR2_103130:CPAR2_106680:CPAR2_106690:CPAR2_108060:CPAR2_200830:CPAR2_212620:CPAR2_401360:CPAR2_402040:CPAR2_403820:GAP2:CPAR2_601050:CPAR2_603080:CPAR2_603530:CPAR2_804540:CPAR2_808410	5313:15193:15181:15355:15203:15191:15105:5290:15188:15183:15297:15129:8508:97079:15185:15186:15189:15171:5302:15104:5310
5342	organic acid transmembrane transporter activity	15 out of 373 genes, 4.0%	72 out of 5984 background genes, 1.2%	0.00571	0	CPAR2_103130:CPAR2_106680:CPAR2_106690:CPAR2_108060:CPAR2_200830:CPAR2_212620:CPAR2_401360:CPAR2_402040:CPAR2_403820:GAP2:CPAR2_601050:CPAR2_603080:CPAR2_603530:CPAR2_804540:CPAR2_808410	5313:15193:15181:15355:15203:15191:15105:5290:15188:15183:15297:15129:8508:97079:15185:15186:15189:15171:5302:15104:5310
22892	substrate-specific transporter activity	40 out of 373 genes, 10.7%	333 out of 5984 background genes, 5.6%	0.00739	0	CPAR2_103130:CPAR2_105760:CPAR2_106680:CPAR2_106690:CPAR2_108060:CPAR2_108340:CPAR2_200830:CPAR2_203720:CPAR2_206870:CPAR2_209780:CPAR2_212620:CPAR2_212850:CPAR2_301390:CPAR2_400790:CPAR2_401360:CPAR2_401450:CPAR2_402040:CPAR2_403600:CPAR2_403820:CDR1:CPAR2_501010:CPAR2_502100:GAP2:CPAR2_503880:CPAR2_504080:CPAR2_600460:CPAR2_600610:CPAR2_601050:CPAR2_603080:CPAR2_603530:CPAR2_700420:CPAR2_701650…	4008:5313:5324:4012:10174:166:42937:15212:15193:15181:15355:8559:15293:15203:8554:15191:15244:15105:42936:5290:15188:15250:15606:5345:15183:8565:22891:15297:15129:8508:35673:15572:8144:5548:97079:46872:8526:15238:15079:15185:15205:5415:15186:5524:15189:15171:5302:15104:8556:62:42626:5310
22891	substrate-specific transmembrane transporter activity	34 out of 373 genes, 9.1%	275 out of 5984 background genes, 4.6%	0.01648	0	CPAR2_103130:CPAR2_105760:CPAR2_106680:CPAR2_106690:CPAR2_108060:CPAR2_108340:CPAR2_200830:CPAR2_203720:CPAR2_206870:CPAR2_209780:CPAR2_212620:CPAR2_212850:CPAR2_301390:CPAR2_400790:CPAR2_401360:CPAR2_401450:CPAR2_402040:CPAR2_403820:CPAR2_501010:CPAR2_502100:GAP2:CPAR2_503880:CPAR2_504080:CPAR2_600460:CPAR2_601050:CPAR2_603080:CPAR2_603530:CPAR2_701650:CPAR2_800150:CPAR2_800240:CPAR2_804540:CPAR…	4008:5313:10174:166:15212:15193:15181:15355:15293:15203:8554:15191:15105:5290:15188:15250:15606:5345:15183:22891:15297:15129:8508:35673:15572:97079:46872:15238:15079:15185:15205:5415:15186:15189:15171:5302:15104:8556:5310
5215	transporter activity	44 out of 373 genes, 11.8%	393 out of 5984 background genes, 6.6%	0.01662	0	CPAR2_103130:CPAR2_105760:CPAR2_106680:CPAR2_106690:CPAR2_108060:CPAR2_108340:CPAR2_200830:CPAR2_202130:CPAR2_203720:CPAR2_206870:MLT1:CPAR2_209780:CPAR2_212620:CPAR2_212850:CPAR2_301390:MDR1:CPAR2_400790:CPAR2_401360:CPAR2_401450:CPAR2_402040:CPAR2_403600:CPAR2_403820:CDR1:CPAR2_407200:CPAR2_501010:CPAR2_502100:GAP2:CPAR2_503880:CPAR2_504080:CPAR2_600460:CPAR2_600610:CPAR2_601050:CPAR2_603080:CP…	4008:5313:5324:4012:10174:166:42937:15212:15193:15181:15355:8559:15293:15203:8554:15191:15244:15105:42936:5290:15188:15250:15606:5345:15183:8565:22891:15297:15129:8508:35673:15572:8144:5548:97079:46872:8526:15238:15079:15185:15205:5415:15186:5524:15189:15171:5302:15104:8556:62:42626:5310
16712	oxidoreductase activity, acting on paired donors, with incorporation or reduction of molecular oxygen, reduced flavin or flavoprotein as one donor, and incorporation of one atom of oxygen	5 out of 373 genes, 1.3%	9 out of 5984 background genes, 0.2%	0.01948	0	CPAR2_203780:CPAR2_204210:CPAR2_204220:CPAR2_206990:CPAR2_600870	5506:16712:9055:18685:19825:20037
15171	amino acid transmembrane transporter activity	12 out of 373 genes, 3.2%	55 out of 5984 background genes, 0.9%	0.02276	0.0018	CPAR2_103130:CPAR2_106680:CPAR2_106690:CPAR2_108060:CPAR2_200830:CPAR2_212620:CPAR2_401360:CPAR2_403820:GAP2:CPAR2_603080:CPAR2_603530:CPAR2_804540	5313:15193:15181:15203:15191:5290:15188:15183:15185:15186:15189:15171:5302
15238	drug transmembrane transporter activity	6 out of 373 genes, 1.6%	15 out of 5984 background genes, 0.3%	0.03621	0.0033	CPAR2_202130:CPAR2_209780:MDR1:CDR1:CPAR2_603080:CPAR2_806580	4012:10174:15212:15181:8559:15293:15244:5290:8144:15238:15205:5415:5524:15189
90484	drug transporter activity	6 out of 373 genes, 1.6%	15 out of 5984 background genes, 0.3%	0.03621	0.0031	CPAR2_202130:CPAR2_209780:MDR1:CDR1:CPAR2_603080:CPAR2_806580	4012:10174:15212:15181:8559:15293:15244:5290:8144:15238:15205:5415:5524:15189
8514	organic anion transmembrane transporter activity	15 out of 373 genes, 4.0%	84 out of 5984 background genes, 1.4%	0.03682	0.0029	CPAR2_103130:CPAR2_106680:CPAR2_106690:CPAR2_108060:CPAR2_200830:CPAR2_212620:CPAR2_401360:CPAR2_402040:CPAR2_403820:GAP2:CPAR2_601050:CPAR2_603080:CPAR2_603530:CPAR2_804540:CPAR2_808410	5313:15193:15181:15355:15203:15191:15105:5290:15188:15183:15297:15129:8508:97079:15185:15186:15189:15171:5302:15104:5310
15193	L-proline transmembrane transporter activity	3 out of 373 genes, 0.8%	3 out of 5984 background genes, 0.1%	0.04999	0.0067	CPAR2_403820:GAP2:CPAR2_603530	15193:15203
8574	plus-end-directed microtubule motor activity	3 out of 373 genes, 0.8%	3 out of 5984 background genes, 0.1%	0.04999	0.0062	CPAR2_214070:CPAR2_405870:CPAR2_807050	8574:5524:70463:46982:8017
Cellular Component
5875	microtubule associated complex	8 out of 373 genes, 2.1%	15 out of 5984 background genes, 0.3%	0.00015	0	CPAR2_202310:CPAR2_203010:CPAR2_204850:CPAR2_214070:CPAR2_405870:CPAR2_407060:CPAR2_806610:CPAR2_807050	5871:5829:5739:5777:5938:5868:5869:5881:5816:235:5875:5880:5643:5634:5876:51285
5874	microtubule	10 out of 373 genes, 2.7%	32 out of 5984 background genes, 0.5%	0.00245	0	CPAR2_105880:CPAR2_108480:CPAR2_202310:CPAR2_203010:CPAR2_204200:CPAR2_204850:CPAR2_214070:CPAR2_405870:CPAR2_407060:CPAR2_807050	72687:5871:5628:131:5829:32160:5739:5777:5938:5868:144:5869:5881:235:5816:5875:5880:45298:5643:31105:5634:42729:1411:30428:43332:5876:1400:51285
5881	cytoplasmic microtubule	7 out of 373 genes, 1.9%	16 out of 5984 background genes, 0.3%	0.00404	0	CPAR2_105880:CPAR2_202310:CPAR2_204850:CPAR2_214070:CPAR2_405870:CPAR2_407060:CPAR2_807050	5871:5829:5739:5777:5938:5868:5869:5881:235:5816:5875:5880:45298:5643:5634:5876:51285
16021	integral component of membrane	52 out of 373 genes, 13.9%	528 out of 5984 background genes, 8.8%	0.08095	0.025	CPAR2_100330:SLS1:CPAR2_101860:CPAR2_105760:CPAR2_106560:CPAR2_106690:CPAR2_108050:CPAR2_108340:CPAR2_202130:CPAR2_203720:MLT1:CPAR2_207540:CPAR2_208900:CPAR2_209680:CPAR2_209690:CPAR2_210290:CPAR2_212850:CPAR2_214070:CPAR2_300590:CPAR2_300670:CPAR2_300680:CPAR2_301390:CPAR2_301640:MDR1:CPAR2_400160:CPAR2_400790:CPAR2_401450:CPAR2_402040:CPAR2_403600:CPAR2_403820:CDR1:CPAR2_405690:CPAR2_406250:CP…	30176:9986:5789:42645:30134:506:51286:5881:30427:329:16021:5816:5886:5771:32153:5887:5639:5737:5829:328:5739:5783:5777:5794:5938:5868:32126:5743:5643:5634:5576:45121
5887	integral component of plasma membrane	6 out of 373 genes, 1.6%	18 out of 5984 background genes, 0.3%	0.09187	0.032	CPAR2_101860:CPAR2_108050:CPAR2_210290:MDR1:GAP2:CPAR2_602600	30176:9986:5789:30134:51286:30427:329:5771:5887:5737:328:5739:5794:5938:32126:5634:5576:45121
Results for EFG1 KO (upregulated genes)
GOID	GO_term	Cluster frequency	Background frequency	Corrected P-value	False discovery rate	Gene(s) annotated to the term	Directly Annotated GOID List
Biological Process
15758	glucose transport	7 out of 672 genes, 1.0%	9 out of 5984 background genes, 0.2%	0.00893	0	CPAR2_106120:CPAR2_108370:CPAR2_206020:CPAR2_212860:CPAR2_400190:CPAR2_700080:CPAR2_808020	6096:15758:44406:44117:6006:36168:30448:44182:46323:36178:36180:45916:6000:45944:6043:44114:51156:1900429:6013:6002:55085:45835:71216:9267:6468:1302:122:9749:46015:34605:32445:7165:7070:10515:8361:6046:46835:36170:9405:35690:36244
8645	hexose transport	8 out of 672 genes, 1.2%	13 out of 5984 background genes, 0.2%	0.02595	0.03	CPAR2_106120:GAL1:CPAR2_108370:CPAR2_206020:CPAR2_212860:CPAR2_400190:CPAR2_700080:CPAR2_808020	6096:15758:44406:44117:6006:36168:30448:44182:46323:36178:36180:45916:6000:45944:6043:44114:51156:1900429:6013:6002:55085:33499:45835:15757:9267:71216:6468:1302:122:9749:46015:34605:32445:7165:8361:7070:10515:6046:46835:36170:9405:35690:411:36244
15749	monosaccharide transport	8 out of 672 genes, 1.2%	14 out of 5984 background genes, 0.2%	0.05462	0.02	CPAR2_106120:GAL1:CPAR2_108370:CPAR2_206020:CPAR2_212860:CPAR2_400190:CPAR2_700080:CPAR2_808020	6096:15758:44406:44117:6006:36168:30448:44182:46323:36178:36180:45916:6000:45944:6043:44114:51156:1900429:6013:6002:55085:33499:45835:15757:9267:71216:6468:1302:122:9749:46015:34605:32445:7165:8361:7070:10515:6046:46835:36170:9405:35690:411:36244
Molecular Function
1159	core promoter proximal region DNA binding	16 out of 672 genes, 2.4%	47 out of 5984 background genes, 0.8%	0.00989	0.02	CPAR2_100540:CPAR2_101340:CPAR2_106900:CPAR2_202710:CPAR2_204370:CPAR2_204990:CAT8:CPAR2_210960:CPAR2_301500:CPAR2_400190:CPAR2_405030:CPAR2_406510:CPAR2_407400:CPAR2_407920:CPAR2_501030:CPAR2_805930	982:8270:5507:3714:43565:3697:3729:1159:1078:3690:3677:42162:3700:19237:8234:4197:31492:51880:1085:987:978:1132:1094:1135:46983:8301:1102:1133:1103:46982:1076:1191:1077
982	RNA polymerase II core promoter proximal region sequence-specific DNA binding transcription factor activity	16 out of 672 genes, 2.4%	47 out of 5984 background genes, 0.8%	0.00989	0.01	CPAR2_101340:CPAR2_102740:CPAR2_106900:CPAR2_202710:CPAR2_203990:CPAR2_204370:CAT8:CPAR2_301500:CPAR2_400090:CPAR2_400190:CPAR2_405030:CPAR2_407400:CPAR2_407920:CPAR2_501030:CPAR2_700450:CPAR2_805930	982:8270:5507:3714:43565:51864:1159:1078:3690:42162:19237:31492:51880:1085:987:32454:978:1132:1135:1094:46983:8301:1102:1103:1133:1076:1191:1077
1067	regulatory region nucleic acid binding	21 out of 672 genes, 3.1%	74 out of 5984 background genes, 1.2%	0.01372	0.0067	CPAR2_100540:CPAR2_101340:CPAR2_103510:CPAR2_106900:CPAR2_202710:CPAR2_204370:CPAR2_204990:CAT8:CPAR2_209090:CPAR2_210960:CPAR2_301500:CPAR2_303750:CPAR2_400190:CPAR2_405030:CPAR2_406510:CPAR2_407400:CPAR2_407920:CPAR2_501030:CPAR2_601630:CPAR2_801430:CPAR2_805930	982:1002:8270:5507:166:3714:43565:3697:3729:3713:43035:1005:1159:1078:1008:3690:3677:42162:3700:19237:8234:981:31492:4197:51880:1085:44212:987:978:1132:1135:1094:46983:995:8301:1068:1102:1003:1103:1133:1076:46982:1191:1077
44212	transcription regulatory region DNA binding	20 out of 672 genes, 3.0%	72 out of 5984 background genes, 1.2%	0.02914	0.005	CPAR2_100540:CPAR2_101340:CPAR2_103510:CPAR2_106900:CPAR2_202710:CPAR2_204370:CPAR2_204990:CAT8:CPAR2_209090:CPAR2_210960:CPAR2_301500:CPAR2_303750:CPAR2_400190:CPAR2_405030:CPAR2_406510:CPAR2_407400:CPAR2_407920:CPAR2_501030:CPAR2_801430:CPAR2_805930	982:1002:8270:5507:3714:43565:3697:3729:3713:43035:1005:1159:1078:1008:3690:3677:42162:3700:19237:8234:981:31492:4197:51880:1085:44212:987:978:1132:1135:1094:46983:995:8301:1102:1003:1103:1133:1076:46982:1191:1077
975	regulatory region DNA binding	20 out of 672 genes, 3.0%	72 out of 5984 background genes, 1.2%	0.02914	0.004	CPAR2_100540:CPAR2_101340:CPAR2_103510:CPAR2_106900:CPAR2_202710:CPAR2_204370:CPAR2_204990:CAT8:CPAR2_209090:CPAR2_210960:CPAR2_301500:CPAR2_303750:CPAR2_400190:CPAR2_405030:CPAR2_406510:CPAR2_407400:CPAR2_407920:CPAR2_501030:CPAR2_801430:CPAR2_805930	982:1002:8270:5507:3714:43565:3697:3729:3713:43035:1005:1159:1078:1008:3690:3677:42162:3700:19237:8234:981:31492:4197:51880:1085:44212:987:978:1132:1135:1094:46983:995:8301:1102:1003:1103:1133:1076:46982:1191:1077
987	core promoter proximal region sequence-specific DNA binding	15 out of 672 genes, 2.2%	46 out of 5984 background genes, 0.8%	0.03099	0.0033	CPAR2_100540:CPAR2_101340:CPAR2_106900:CPAR2_202710:CPAR2_204370:CPAR2_204990:CAT8:CPAR2_210960:CPAR2_400190:CPAR2_405030:CPAR2_406510:CPAR2_407400:CPAR2_407920:CPAR2_501030:CPAR2_805930	982:8270:3714:43565:3697:3729:1078:3690:3677:42162:3700:19237:8234:31492:4197:51880:1085:987:978:1132:1135:1094:46983:8301:1102:1103:1133:1076:46982:1191:1077
4190	aspartic-type endopeptidase activity	10 out of 672 genes, 1.5%	24 out of 5984 background genes, 0.4%	0.04718	0.0114	CPAR2_100750:CPAR2_102400:SAPP1:SAPP3:SAPP2:CPAR2_102590:CPAR2_102600:CPAR2_500920:CPAR2_702040:CPAR2_805340	8233:4190
70001	aspartic-type peptidase activity	10 out of 672 genes, 1.5%	24 out of 5984 background genes, 0.4%	0.04718	0.01	CPAR2_100750:CPAR2_102400:SAPP1:SAPP3:SAPP2:CPAR2_102590:CPAR2_102600:CPAR2_500920:CPAR2_702040:CPAR2_805340	8233:4190
978	RNA polymerase II core promoter proximal region sequence-specific DNA binding	13 out of 672 genes, 1.9%	39 out of 5984 background genes, 0.7%	0.07112	0.0089	CPAR2_100540:CPAR2_101340:CPAR2_106900:CPAR2_202710:CPAR2_204990:CAT8:CPAR2_210960:CPAR2_400190:CPAR2_405030:CPAR2_406510:CPAR2_407920:CPAR2_501030:CPAR2_805930	8270:3714:43565:3697:3729:1078:3690:3677:3700:19237:8234:4197:1085:978:1135:46983:1102:1103:1133:1076:46982:1191:1077
3968	RNA-directed RNA polymerase activity	7 out of 672 genes, 1.0%	13 out of 5984 background genes, 0.2%	0.07155	0.008	CPAR2_109340:CPAR2_110000:CPAR2_204030:CPAR2_401530:CPAR2_406490:CPAR2_500440:GLK1	31369:1055:8270:3697:3727:3677:3899:1056:3968:46983:1054
Cellular Component
5743	mitochondrial inner membrane	38 out of 672 genes, 5.7%	158 out of 5984 background genes, 2.6%	0.00088	0	CPAR2_100450:CPAR2_102810:CPAR2_104030:CPAR2_105820:CPAR2_108530:CPAR2_201840:CPAR2_202470:CPAR2_203760:CPAR2_206680:COX4:CPAR2_209870:CPAR2_209880:CPAR2_210340:CPAR2_210500:CPAR2_211490:CPAR2_211580:CPAR2_213170:CPAR2_213630:CPAR2_300080:CPAR2_303330:CPAR2_304360:CPAR2_400600:CPAR2_401240:CPAR2_401510:CPAR2_401680:CPAR2_401730:CPAR2_401760:CPAR2_404380:CPAR2_407040:CPAR2_500070:CPAR2_502520:CPAR…	31942:30061:1405:44284:5829:276:5758:5744:42720:97002:42645:31304:42653:275:329:16021:5759:5886:5743:31305:42719:5634:5751:31314:97249:42721:30446:5761:31307
44455	mitochondrial membrane part	34 out of 672 genes, 5.1%	137 out of 5984 background genes, 2.3%	0.0014	0	CPAR2_100450:CPAR2_102810:CPAR2_104030:CPAR2_105820:CPAR2_107160:CPAR2_201840:CPAR2_202470:CPAR2_203760:CPAR2_205840:CPAR2_206680:COX4:CPAR2_209870:CPAR2_209880:CPAR2_210340:CPAR2_210500:CPAR2_211490:CPAR2_212700:CPAR2_213170:CPAR2_304360:CPAR2_400600:CPAR2_401240:CPAR2_401510:CPAR2_401680:CPAR2_401760:CPAR2_404380:CPAR2_407040:CPAR2_500070:CPAR2_502520:CPAR2_503820:CPAR2_600210:CPAR2_600370:CPAR…	31942:30061:1405:44284:5829:276:5758:5744:42720:97002:42645:31304:42653:275:329:16021:5759:5886:5743:31305:42719:32865:5634:97249:31314:5751:42721:32592:5576:30446:31307
19866	organelle inner membrane	38 out of 672 genes, 5.7%	165 out of 5984 background genes, 2.8%	0.00266	0	CPAR2_100450:CPAR2_102810:CPAR2_104030:CPAR2_105820:CPAR2_108530:CPAR2_201840:CPAR2_202470:CPAR2_203760:CPAR2_206680:COX4:CPAR2_209870:CPAR2_209880:CPAR2_210340:CPAR2_210500:CPAR2_211490:CPAR2_211580:CPAR2_213170:CPAR2_213630:CPAR2_300080:CPAR2_303330:CPAR2_304360:CPAR2_400600:CPAR2_401240:CPAR2_401510:CPAR2_401680:CPAR2_401730:CPAR2_401760:CPAR2_404380:CPAR2_407040:CPAR2_500070:CPAR2_502520:CPAR…	31942:30061:1405:44284:5829:276:5758:5744:42720:97002:42645:31304:42653:275:329:16021:5759:5886:5743:31305:42719:5634:97249:31314:5751:42721:30446:5761:31307
5665	DNA-directed RNA polymerase II, core complex	7 out of 672 genes, 1.0%	12 out of 5984 background genes, 0.2%	0.03009	0	CPAR2_109340:CPAR2_110000:CPAR2_204030:CPAR2_401530:CPAR2_406490:CPAR2_500440:GLK1	5666:5829:5736:932:5665
44429	mitochondrial part	73 out of 672 genes, 10.9%	435 out of 5984 background genes, 7.3%	0.05685	0.008	CPAR2_100440:CPAR2_100450:CPAR2_102810:CPAR2_104030:CPAR2_104970:CPAR2_105820:CPAR2_107160:MTP1:CPAR2_108460:CPAR2_108530:CPAR2_201820:CPAR2_201840:CPAR2_202470:CPAR2_202900:CPAR2_203600:CPAR2_203760:CPAR2_205790:CPAR2_205840:CPAR2_206680:COX4:CPAR2_209250:CPAR2_209870:CPAR2_209880:CPAR2_210340:CPAR2_210500:CPAR2_210770:CPAR2_211490:CPAR2_211560:CPAR2_211580:CPAR2_212700:CPAR2_213170:CPAR2_213630…	31942:5763:276:5744:97002:42645:5762:329:16021:5759:5886:42719:5811:97249:30446:31307:5761:30061:1405:44284:5829:5758:42720:5739:5777:5783:31304:42653:275:5743:31305:5740:32865:5634:5751:31314:42721:32592:5576:5741
31966	mitochondrial membrane	48 out of 672 genes, 7.1%	260 out of 5984 background genes, 4.3%	0.08318	0.0133	CPAR2_100450:CPAR2_102810:CPAR2_104030:CPAR2_105820:CPAR2_107160:CPAR2_108530:CPAR2_201840:CPAR2_202470:CPAR2_203760:CPAR2_205840:CPAR2_206680:COX4:CPAR2_209870:CPAR2_209880:CPAR2_210340:CPAR2_210500:CPAR2_211490:CPAR2_211580:CPAR2_212700:CPAR2_213170:CPAR2_213630:CPAR2_300080:CPAR2_300140:CPAR2_301960:CPAR2_303330:CPAR2_304360:CPAR2_400600:CPAR2_401240:CPAR2_401510:CPAR2_401680:CPAR2_401730:CPAR…	31942:276:5744:97002:42645:329:16021:5759:5886:42719:5811:97249:30446:5761:31307:30061:1405:44284:5829:5758:42720:5783:5777:31304:42653:275:5743:31305:32865:5634:31314:5751:42721:32592:5576:5741
Results for EFG1 KO (downregulated genes)
GOID	GO_term	Cluster frequency	Background frequency	Corrected P-value	False discovery rate	Gene(s) annotated to the term	Directly Annotated GOID List
Biological Process
No significant results.
Molecular Function
4386	helicase activity	20 out of 577 genes, 3.5%	85 out of 5984 background genes, 1.4%	0.04152	0.04	CPAR2_100150:CPAR2_101900:CPAR2_104750:CPAR2_108410:CPAR2_202500:CPAR2_204820:CPAR2_205750:CPAR2_207840:CPAR2_401880:CPAR2_404140:CPAR2_406610:CPAR2_500050:CPAR2_503680:CPAR2_603170:CPAR2_603480:CPAR2_700330:CPAR2_701950:CPAR2_702030:CPAR2_801020:CPAR2_807550	4004:43142:17108:3676:3684:386:8270:3678:43138:4842:70336:8186:3724:43140:3697:8094:3682:5524:822:14:3688:4386:3677:42162:405:3723:4003:8026
22857	transmembrane transporter activity	49 out of 577 genes, 8.5%	309 out of 5984 background genes, 5.2%	0.09206	0.02	CPAR2_100560:CPAR2_103130:CPAR2_103160:CPAR2_104280:ATP1:CPAR2_106680:CPAR2_107280:CPAR2_108060:CPAR2_108070:CPAR2_108210:CPAR2_108220:CPAR2_109860:CPAR2_200150:CPAR2_200830:CPAR2_203330:CPAR2_204940:CPAR2_205330:CPAR2_205610:CPAR2_207430:CPAR2_210610:CPAR2_300840:CPAR2_400790:CPAR2_401360:CPAR2_401450:CPAR2_402040:CPAR2_402870:CPAR2_403600:CPAR2_403820:CPAR2_405240:CPAR2_406990:CPAR2_407200:CPAR…	15127:5262:46933:15200:15093:5351:30943:15398:166:8121:15212:15169:15193:15355:8559:15184:15086:15203:15662:46961:15191:15105:15116:15188:15606:5345:22891:15297:15129:8508:35673:5509:5548:97079:46872:5315:19829:15238:8324:15079:5427:15185:15205:1406:15186:5524:5384:15171:5302:15104:1901584:42626:5310:15266
Cellular Component
No significant results.
Results for UME6 KO (upregulated genes)
GOID	GO_term	Cluster frequency	Background frequency	Corrected P-value	False discovery rate	Gene(s) annotated to the term	Directly Annotated GOID List
Biological Process
6457	protein folding	31 out of 537 genes, 5.8%	87 out of 5984 background genes, 1.5%	5.56e-09	0	CPAR2_103750:CPAR2_105050:CPAR2_106290:CPAR2_106940:CPAR2_109560:CPAR2_200120:CPAR2_200160:CPAR2_200580:HSP60:CPAR2_204330:CPAR2_205020:CPAR2_206000:CPAR2_209200:CPAR2_210450:CPAR2_211560:CPAR2_303530:CPAR2_303650:MDJ1:CPAR2_400300:CPAR2_404840:CPAR2_407620:CPAR2_500400:CPAR2_501270:CPAR2_601260:CPAR2_601620:CPAR2_602330:CPAR2_700360:CPAR2_700380:CPAR2_703150:MGE1:CPAR2_806300	7010:51131:51701:6413:723:7346:97316:15833:161:44416:45454:6458:40009:55114:71216:1319:492:70370:7021:7163:30474:77:50821:34605:8361:6950:30150:42981:31505:7088:70843:43335:43248:9847:70414:42744:6457:44182:34975:2:33619:36180:70389:51972:33194:32212:1900429:6355:42262:42026:51085:9267:32872:6515:51604:44011:6364:1302:71630:10892:43433:6616:9636:9408:32079:36171:36170:45041:35690:9405:30518:30260
42026	protein refolding	9 out of 537 genes, 1.7%	11 out of 5984 background genes, 0.2%	2.03e-05	0	CPAR2_103750:CPAR2_105050:CPAR2_200120:HSP60:CPAR2_204330:CPAR2_211560:MDJ1:CPAR2_700360:MGE1	51131:6458:1319:70370:34605:50821:30150:7088:43335:9847:70414:2:34975:70389:6355:51085:42026:6515:44011:51604:10892:9408:32079:45041:35690:9405
6826	iron ion transport	9 out of 537 genes, 1.7%	14 out of 5984 background genes, 0.2%	0.00057	0	CPAR2_210100:CPAR2_213200:CPAR2_300620:CPAR2_301500:CPAR2_401740:SMF12:CPAR2_602990:FET3:FTR1	15677:33215:10106:6876:55114:15691:33212:70627:30026:6827:45732:6825:44117:71421:44182:1516:1900461:6826:6897:6879:9405:35690:6878
41	transition metal ion transport	13 out of 537 genes, 2.4%	33 out of 5984 background genes, 0.6%	0.00277	0	CPAR2_203490:CPAR2_205460:CPAR2_210100:CPAR2_213200:CPAR2_300620:CPAR2_301500:CPAR2_303120:CPAR2_401740:SMF12:CPAR2_602990:FET3:FTR1:CPAR2_701290	15677:33215:34759:10106:6876:55114:15691:6877:33212:70627:30026:6827:45732:6825:8535:6461:44117:6824:71421:44182:43324:1516:1900461:6828:34599:6826:6897:60003:6879:9405:35690:6878
55114	oxidation-reduction process	63 out of 537 genes, 11.7%	405 out of 5984 background genes, 6.8%	0.00785	0.004	CPAR2_100060:CPAR2_100440:CPAR2_102080:CPAR2_102780:CPAR2_102830:CPAR2_103450:CPAR2_108460:CPAR2_109220:CPR-C1:CPAR2_110430:CPAR2_200520:CPAR2_203440:CPAR2_203450:CPAR2_203520:CPAR2_203530:CPAR2_203600:CPAR2_203760:CPAR2_206620:CPAR2_206630:OLE1:CPAR2_207830:CPAR2_209250:CPAR2_209880:CPAR2_210130:CPAR2_210140:CPAR2_210480:CPAR2_210630:CPAR2_212690:CPAR2_213080:CPAR2_300130:CPAR2_300580:CPAR2_3006…	42180:9060:1410:36178:30448:71210:51701:6636:15677:44114:33215:61407:30447:6801:7623:6567:45454:19418:6882:6116:6123:10106:71216:42183:55114:6744:42149:70627:19379:77:36187:71472:34389:6827:51668:90002:31505:1766:46686:36244:1300:30437:9051:6461:18171:10230:42744:45333:6457:30148:6783:36180:6112:1516:33194:909:19430:71451:46512:6696:16071:19655:16117:42262:52059:7009:2000377:71214:34599:7124:9267…
8535	respiratory chain complex IV assembly	9 out of 537 genes, 1.7%	20 out of 5984 background genes, 0.3%	0.02955	0.0033	CPAR2_200610:CPAR2_202900:CPAR2_203760:CPAR2_208880:CPAR2_502520:CPAR2_503120:CPAR2_503820:CPAR2_600370:CPAR2_701290	9060:30448:6825:8535:6461:32979:30001:33617:6878
Molecular Function
51082	unfolded protein binding	24 out of 537 genes, 4.5%	60 out of 5984 background genes, 1.0%	2.21e-08	0	CPAR2_105050:CPAR2_106290:CPAR2_106940:CPAR2_109560:CPAR2_200120:HSP60:CPAR2_203760:CPAR2_204330:CPAR2_205020:CPAR2_206000:CPAR2_209200:CPAR2_210450:CPAR2_300510:CPAR2_303650:MDJ1:CPAR2_400300:CPAR2_400600:CPAR2_404840:CPAR2_501270:CPAR2_601620:CPAR2_700360:CPAR2_700380:CPAR2_703150:CPAR2_806300	43022:51087:31072:1671:43531:3697:42277:51787:8134:51082:5524:3755:8379:3688:19901:30985:15631:8565:30234:16887:42623
16491	oxidoreductase activity	62 out of 537 genes, 11.5%	412 out of 5984 background genes, 6.9%	0.00658	0	CPAR2_100040:CPAR2_100060:CPAR2_102080:CPAR2_102780:CPAR2_102830:CPAR2_103450:CPAR2_105790:CPAR2_108460:CPR-C1:CPAR2_110430:CPAR2_200520:CPAR2_200610:CPAR2_201550:CPAR2_203440:CPAR2_203450:CPAR2_203520:CPAR2_206620:CPAR2_206630:OLE1:CPAR2_207830:CPAR2_209880:CPAR2_210130:CPAR2_210140:CPAR2_210480:CPAR2_210630:CPAR2_212690:CPAR2_213080:CPAR2_300130:CPAR2_300580:CPAR2_300620:CPAR2_300630:CPAR2_3033…	170:43022:3954:16652:42284:51287:5506:8270:5507:16717:4090:4768:47018:16722:4506:16641:16491:16972:43892:15036:16747:8379:4364:4322:4129:51920:9916:32542:46872:4784:4109:4616:46568:20037:293:4022:50660:16616:50661:43565:47019:51864:3756:4130:35064:1078:249:9055:3677:46914:33754:8398:8177:4602:8144:4497:32454:8823:16705:10181:1102:51082:50662:30985:8863:4375:15035
5507	copper ion binding	8 out of 537 genes, 1.5%	16 out of 5984 background genes, 0.3%	0.00794	0	CPAR2_201510:CPAR2_202900:CPAR2_205460:CPAR2_301500:CPAR2_303120:CPAR2_401730:FET3:CPAR2_701290	16531:5507:4322:981:1077:166:1159:3677:19829
51087	chaperone binding	8 out of 537 genes, 1.5%	18 out of 5984 background genes, 0.3%	0.02297	0.015	CPAR2_200580:HSP60:CPAR2_204330:CPAR2_601260:CPAR2_602330:CPAR2_700360:CPAR2_703150:MGE1	43531:51087:8134:5524:3688:774:42623:3697:42803:16887:1671:51082
1159	core promoter proximal region DNA binding	13 out of 537 genes, 2.4%	47 out of 5984 background genes, 0.8%	0.05046	0.012	CPAR2_103890:CPAR2_106900:CPAR2_205120:CAT8:CPAR2_301500:CPAR2_400190:CPAR2_400410:CPAR2_405260:CPAR2_407160:CPAR2_407400:CPAR2_407920:CPAR2_501030:CPAR2_805930	8270:5507:1106:988:987:978:1132:1094:46983:5198:17025:1076:1191:1077:982:3714:43565:1159:1078:42162:19237:31492:51880:1085:1135:8301:1102:1103:1133
60590	ATPase regulator activity	8 out of 537 genes, 1.5%	21 out of 5984 background genes, 0.4%	0.08377	0.0233	CPAR2_103750:CPAR2_200580:CPAR2_303530:MDJ1:CPAR2_602330:CPAR2_602960:CPAR2_702150:MGE1	42030:31072:51087:5524:774:30544:3729:42277:51879:42803:1671:51082
Cellular Component
5758	mitochondrial intermembrane space	18 out of 537 genes, 3.4%	55 out of 5984 background genes, 0.9%	0.00015	0	CPAR2_100440:CPAR2_102830:CPAR2_200610:CPAR2_200870:CPAR2_202900:CPAR2_400600:CPAR2_401510:CPAR2_401730:CPAR2_500070:CPAR2_503120:CPAR2_503820:CPAR2_600370:CPAR2_603020:CPAR2_603400:CPAR2_702000:CPAR2_801120:CPAR2_802350:CPAR2_807840	30061:5829:5758:97002:31304:31966:329:5759:5886:5743:19898:31305:42719:5634:31314:5751:42721:5761
5832	chaperonin-containing T-complex	7 out of 537 genes, 1.3%	9 out of 5984 background genes, 0.2%	0.00032	0	CPAR2_106940:CPAR2_109560:CPAR2_210450:CPAR2_303650:CPAR2_400300:CPAR2_501270:CPAR2_806300	5829:9986:5739:329:5886:5844:5634:5832:30446
31970	organelle envelope lumen	18 out of 537 genes, 3.4%	60 out of 5984 background genes, 1.0%	0.00063	0	CPAR2_100440:CPAR2_102830:CPAR2_200610:CPAR2_200870:CPAR2_202900:CPAR2_400600:CPAR2_401510:CPAR2_401730:CPAR2_500070:CPAR2_503120:CPAR2_503820:CPAR2_600370:CPAR2_603020:CPAR2_603400:CPAR2_702000:CPAR2_801120:CPAR2_802350:CPAR2_807840	30061:5829:5758:97002:31304:31966:329:5759:5886:5743:19898:31305:42719:5634:5751:31314:42721:5761
5740	mitochondrial envelope	50 out of 537 genes, 9.3%	305 out of 5984 background genes, 5.1%	0.00338	0	CPAR2_100440:CPAR2_102780:CPAR2_102810:CPAR2_102830:CPAR2_104030:CPAR2_105050:CPAR2_108460:CPAR2_108530:CPAR2_109220:CPAR2_200610:CPAR2_200870:CPAR2_202900:CPAR2_203760:CPAR2_205840:CPAR2_209880:CPAR2_211490:CPAR2_212700:CPAR2_300080:CPAR2_300140:CPAR2_303330:MDJ1:CPAR2_400600:CPAR2_401510:CPAR2_401680:CPAR2_401730:CPAR2_401760:CPAR2_404280:CPAR2_500070:CPAR2_500400:CPAR2_502270:CPAR2_502520:CPAR…	31942:276:9986:5744:97002:42645:31966:329:16021:5759:5886:72380:19898:42719:30445:5761:31307:1405:30061:5829:44284:5758:5739:5777:31304:214:275:5743:31305:5740:32865:5634:31314:5751:42721:32592:5741
44429	mitochondrial part	63 out of 537 genes, 11.7%	435 out of 5984 background genes, 7.3%	0.01459	0.004	CPAR2_100440:CPAR2_102780:CPAR2_102810:CPAR2_102830:CPAR2_104030:CPAR2_105050:CPAR2_108460:CPAR2_108530:CPAR2_109220:CPAR2_200610:CPAR2_200870:CPAR2_202900:HSP60:CPAR2_203600:CPAR2_203760:CPAR2_205840:CPAR2_209250:CPAR2_209880:CPAR2_211490:CPAR2_211560:CPAR2_212700:CPAR2_300080:CPAR2_300140:ECM42:CPAR2_302710:CPAR2_303330:CPAR2_304090:MDJ1:CPAR2_400460:CPAR2_400600:CPAR2_401510:CPAR2_401680:CPAR2…	31942:5763:276:9986:5744:97002:42645:31966:5762:329:16021:5759:5886:72380:19898:42719:30445:5761:31307:30061:1405:44284:5829:5758:5777:5739:31304:214:275:5743:31305:32865:5740:5634:5751:31314:42721:32592:5741
5743	mitochondrial inner membrane	29 out of 537 genes, 5.4%	158 out of 5984 background genes, 2.6%	0.03085	0.0033	CPAR2_102810:CPAR2_104030:CPAR2_105050:CPAR2_108530:CPAR2_109220:CPAR2_200870:CPAR2_203760:CPAR2_209880:CPAR2_211490:CPAR2_300080:CPAR2_303330:MDJ1:CPAR2_400600:CPAR2_401510:CPAR2_401680:CPAR2_401730:CPAR2_401760:CPAR2_500070:CPAR2_500400:CPAR2_502520:CPAR2_503820:CPAR2_600210:CPAR2_600370:CPAR2_700590:CPAR2_700780:CPAR2_701290:MGE1:CPAR2_805860:CPAR2_807640	31942:276:9986:5744:97002:42645:16021:329:5759:5886:72380:42719:30445:5761:31307:30061:1405:44284:5829:5758:31304:275:5743:31305:5634:5751:31314:42721
19866	organelle inner membrane	29 out of 537 genes, 5.4%	165 out of 5984 background genes, 2.8%	0.0672	0.0029	CPAR2_102810:CPAR2_104030:CPAR2_105050:CPAR2_108530:CPAR2_109220:CPAR2_200870:CPAR2_203760:CPAR2_209880:CPAR2_211490:CPAR2_300080:CPAR2_303330:MDJ1:CPAR2_400600:CPAR2_401510:CPAR2_401680:CPAR2_401730:CPAR2_401760:CPAR2_500070:CPAR2_500400:CPAR2_502520:CPAR2_503820:CPAR2_600210:CPAR2_600370:CPAR2_700590:CPAR2_700780:CPAR2_701290:MGE1:CPAR2_805860:CPAR2_807640	31942:276:9986:5744:97002:42645:16021:329:5759:5886:72380:42719:30445:5761:31307:30061:1405:44284:5829:5758:31304:275:5743:31305:5634:5751:31314:42721
5739	mitochondrion	113 out of 537 genes, 21.0%	943 out of 5984 background genes, 15.8%	0.0933	0.0025	CPAR2_100390:CPAR2_100440:SFC1:CPAR2_100890:CPAR2_101620:CPAR2_102780:CPAR2_102810:CPAR2_102830:CPAR2_103280:CPAR2_103450:CPAR2_104030:CPAR2_104450:CPAR2_105050:CPAR2_105490:CPAR2_105760:CPAR2_105790:CPAR2_106030:CPAR2_106280:CPAR2_106940:CPAR2_108460:CPAR2_108530:CPAR2_109220:CPAR2_109550:CPAR2_200610:CPAR2_200870:CPAR2_201170:CPAR2_201550:CPAR2_202900:HSP60:CPAR2_203490:CPAR2_203520:CPAR2_20353…	31942:778:5763:276:9986:33553:5744:812:97002:42645:31011:407:46658:31966:5762:9514:16021:329:5816:5759:5886:790:5844:786:31390:72380:19898:42719:776:5832:30445:30446:5761:31307:30061:1405:44284:5829:5758:5777:5783:5739:5794:31304:16023:214:275:5743:5960:9277:31305:32865:16020:5740:32044:5634:5751:31314:42721:32592:5576:5741:43596
44455	mitochondrial membrane part	25 out of 537 genes, 4.7%	137 out of 5984 background genes, 2.3%	0.09712	0.0044	CPAR2_102810:CPAR2_104030:CPAR2_105050:CPAR2_109220:CPAR2_200870:CPAR2_203760:CPAR2_205840:CPAR2_209880:CPAR2_211490:CPAR2_212700:MDJ1:CPAR2_400600:CPAR2_401510:CPAR2_401680:CPAR2_401760:CPAR2_500070:CPAR2_500400:CPAR2_502520:CPAR2_503820:CPAR2_600210:CPAR2_600370:CPAR2_700590:CPAR2_700780:MGE1:CPAR2_808490	31942:276:9986:5744:97002:42645:329:5759:5886:72380:42719:30445:31307:30061:1405:44284:5829:5758:31304:275:5743:31305:32865:5634:5751:31314:42721:32592
Results for UME6 KO (downregulated genes)
GOID	GO_term	Cluster frequency	Background frequency	Corrected P-value	False discovery rate	Gene(s) annotated to the term	Directly Annotated GOID List
Biological Process
6271	DNA strand elongation involved in DNA replication	11 out of 496 genes, 2.2%	27 out of 5984 background genes, 0.5%	0.00448	0	CPAR2_101420:CPAR2_105020:CPAR2_201880:CPAR2_202500:CPAR2_212890:CPAR2_300470:CPAR2_401880:CPAR2_404670:CPAR2_603480:CPAR2_801440:CPAR2_805280	6272:60543:1302:6267:6279:727:723:6270:36297:725:733:84:6278:6268:706:51097:31860:6271:7062:6357:30466:6348:33567:43137:86
22616	DNA strand elongation	11 out of 496 genes, 2.2%	29 out of 5984 background genes, 0.5%	0.0102	0	CPAR2_101420:CPAR2_105020:CPAR2_201880:CPAR2_202500:CPAR2_212890:CPAR2_300470:CPAR2_401880:CPAR2_404670:CPAR2_603480:CPAR2_801440:CPAR2_805280	6272:60543:1302:6267:6279:727:723:6270:36297:725:733:84:6278:6268:706:51097:31860:7062:6271:6357:6348:30466:33567:43137:86
51320	S phase	6 out of 496 genes, 1.2%	10 out of 5984 background genes, 0.2%	0.05105	0.02	CPAR2_104750:CPAR2_105020:CPAR2_201880:CPAR2_202500:CPAR2_404670:CPAR2_801440	6267:6279:30174:727:6343:6270:31939:84:6268:51097:6271:6357:30466:6348
84	mitotic S phase	6 out of 496 genes, 1.2%	10 out of 5984 background genes, 0.2%	0.05105	0.015	CPAR2_104750:CPAR2_105020:CPAR2_201880:CPAR2_202500:CPAR2_404670:CPAR2_801440	6267:6279:30174:727:6343:6270:31939:84:6268:51097:6271:6357:30466:6348
6310	DNA recombination	22 out of 496 genes, 4.4%	111 out of 5984 background genes, 1.9%	0.09058	0.028	CPAR2_101900:CPAR2_102110:CPAR2_103920:CPAR2_104750:CPAR2_105020:CPAR2_200400:CPAR2_201880:CPAR2_202500:CPAR2_202810:CPAR2_300470:CPAR2_301520:CPAR2_400330:CPAR2_401150:CPAR2_401880:CPAR2_403500:CPAR2_404670:CPAR2_404760:CPAR2_801440:CPAR2_801900:CPAR2_802330:CPAR2_806690:CPAR2_807670	60543:6261:31292:7131:734:36180:6279:727:6312:737:6343:71165:6270:34184:713:31939:84:7076:6281:710:6268:706:7062:30435:42138:30466:6348:722:33567:6284:34599:9267:71216:7130:6298:2000720:6267:10526:6302:6303:70058:51177:6310:30174:32078:77:71139:51304:36297:725:51598:45842:30261:51097:36170:6271:6357:35690:724:7064:30437
6260	DNA replication	21 out of 496 genes, 4.2%	104 out of 5984 background genes, 1.7%	0.09868	0.0233	CPAR2_101420:CPAR2_104750:CPAR2_104870:CPAR2_105020:CPAR2_200400:CPAR2_200950:CPAR2_201880:CPAR2_202500:CPAR2_207920:CPAR2_211690:CPAR2_212890:CPAR2_300470:CPAR2_301520:CPAR2_401880:CPAR2_404670:CPAR2_405800:CPAR2_500370:CPAR2_500980:CPAR2_603480:CPAR2_801440:CPAR2_805280	6269:6272:60543:6261:36180:6279:727:723:6343:71165:6270:27:42276:31939:84:6281:48478:6268:706:45184:31860:7062:7004:30466:6348:33567:43570:71216:55114:9267:90329:1302:6364:10526:43111:6267:6260:30174:77:70987:36297:725:9263:45132:733:45005:6278:34087:731:51097:36170:6271:6357:35690:724:43137:76:86:7064:54
Molecular Function
43566	structure-specific DNA binding	19 out of 496 genes, 3.8%	93 out of 5984 background genes, 1.6%	0.05133	0	CPAR2_104750:CPAR2_200950:CPAR2_201880:CPAR2_202500:CPAR2_202810:ACO1:CPAR2_400330:CPAR2_401150:CPAR2_401880:CPAR2_404670:CPAR2_500980:CPAR2_801440:CPAR2_801760:CPAR2_801900:CPAR2_802330:CPAR2_803330:CPAR2_806260:CPAR2_806690:CPAR2_807670	1002:17116:43142:3684:43047:3994:70336:9378:3887:3697:51539:43035:3896:1005:400:1008:3690:14:3680:32138:16887:404:51880:217:30983:3678:32139:43138:4017:995:43140:3682:1003:5524:3688:46982:71443:3691:3712:32137
3697	single-stranded DNA binding	12 out of 496 genes, 2.4%	45 out of 5984 background genes, 0.8%	0.06163	0	CPAR2_104750:CPAR2_200950:CPAR2_201880:CPAR2_202500:ACO1:CPAR2_401150:CPAR2_404670:CPAR2_500980:CPAR2_801440:CPAR2_802330:CPAR2_806260:CPAR2_807670	17116:43142:3684:43047:3994:9378:3887:3697:51539:3896:3690:16887:404:51880:3678:32139:4017:43140:3682:5524:3688:46982:3691:3712
Cellular Component
42555	MCM complex	6 out of 496 genes, 1.2%	6 out of 5984 background genes, 0.1%	8.23e-05	0	CPAR2_104750:CPAR2_105020:CPAR2_201880:CPAR2_202500:CPAR2_404670:CPAR2_801440	790:5737:31298:5829:31261:42555:784:5656:30875:97373
31298	replication fork protection complex	9 out of 496 genes, 1.8%	21 out of 5984 background genes, 0.4%	0.00532	0	CPAR2_104750:CPAR2_104870:CPAR2_105020:CPAR2_201880:CPAR2_202500:CPAR2_300470:CPAR2_301520:CPAR2_404670:CPAR2_801440	811:790:5737:31298:5829:31261:42555:784:30875:5656:97373
43596	nuclear replication fork	11 out of 496 genes, 2.2%	37 out of 5984 background genes, 0.6%	0.03462	0.0133	CPAR2_104750:CPAR2_104870:CPAR2_105020:CPAR2_200950:CPAR2_201880:CPAR2_202500:CPAR2_300470:CPAR2_301520:CPAR2_404670:CPAR2_500980:CPAR2_801440	811:790:5737:31298:5829:31261:5658:42555:784:5635:30875:5656:97373:8622
31261	DNA replication preinitiation complex	8 out of 496 genes, 1.6%	22 out of 5984 background genes, 0.4%	0.06185	0.015	CPAR2_104750:CPAR2_105020:CPAR2_201880:CPAR2_202500:CPAR2_300470:CPAR2_301520:CPAR2_404670:CPAR2_801440	811:790:5737:31298:5829:31261:42555:784:30875:5656:97373
32040	small-subunit processome	12 out of 496 genes, 2.4%	46 out of 5984 background genes, 0.8%	0.06832	0.016	CPAR2_101940:CPAR2_109630:CPAR2_203250:CPAR2_211200:CPAR2_213320:CPAR2_302160:CPAR2_406150:CPAR2_700350:CPAR2_700720:CPAR2_803400:CPAR2_803700:CPAR2_803990	5737:9986:5829:33553:5840:5654:32040:5739:34388:34457:15934:30688:5730:16020:5634:44732:30686:22627:30445:34455
5657	replication fork	12 out of 496 genes, 2.4%	47 out of 5984 background genes, 0.8%	0.08499	0.0133	CPAR2_104750:CPAR2_104870:CPAR2_105020:CPAR2_200950:CPAR2_201880:CPAR2_202500:CPAR2_212890:CPAR2_300470:CPAR2_301520:CPAR2_404670:CPAR2_500980:CPAR2_801440	5737:31298:5829:5658:42555:5635:5663:30875:5656:8622:811:790:31389:31390:31261:5634:784:31391:97373
