# Supplementary material for: Comparative Phenotypic Analysis of the Major Fungal Pathogens Candida parapsilosis and Candida albicans
Source: PLoS Pathog. 2014 Sep 18;10(9):e1004365. doi: 10.1371/journal.ppat.1004365 (PMC4169492; doi:10.1371/journal.ppat.1004365)
Supplement: Table S6 — List of primers used. (XLS) [file ppat.1004365.s010.xls]

## Sheet: Deletion primers
Table S6. List of primers used
Deletion strain	C. parapsilosis ID	C. albicans orthologue	Gene Name	Primer 1	Primer 2 (universal)	Primer 3	Primer 5	Primer 4	Primer 6	5' Check	3' Check	5' ORF	3' ORF
ckb1Δ	CPAR2_213480	orf19.2102	CKB1	TGTATGTGTGTGTGTATGCCATT	ccgctgctaggcgcgccgtgACCAGTGTGATGGATATCTGC	cacggcgcgcctagcagcggTTGATTGTGGAGTTATGTAGTTGATT	gcagggatgcggccgctgacATAATGCCGGTCAACGGAGCagctcggatccactagtaacg	gtcagcggccgcatccctgcCCATGGCTAGCGAGTAGAGAA	CGACGATGCAGTATCGAAAT	CGACACTCCATTCAGAGGAA	AAATCACCCGGATGTGTCAT	TGAAGATCACGCCAATACCA	CTTTGGATGCTGCCTTAACC
ckb2Δ	CPAR2_501900	orf19.4297	CKB2	TTGGTTTGGCGATTAGCTCT		cacggcgcgcctagcagcggAGTTTCTAGTTGGTTAAGATAG	gcagggatgcggccgctgacATGAGGCGTCGAACTCTTCCagctcggatccactagtaacg	gtcagcggccgcatccctgcTATGATCGTAGCATAGCTTTGG	CAACTCAGTAGCGGGTTTGA	AAATTGGACCCACCATTTTG	TGCTGTGCTTTCAGTTTCCA	CGGGGCTAAATCAAGAAGTG	CGAGGCACATACGTTTCCTT
vps34Δ	CPAR2_206880	orf19.6243	VPS34	TGGATTCATGGAGGAAATTCAA		cacggcgcgcctagcagcggGGAGATAAAAGTTGGTTTGTAA	gcagggatgcggccgctgacTGCGACTCACTCTCATATTGagctcggatccactagtaacg	gtcagcggccgcatccctgcGAGCATAGATGGAAAGAGAAC	GCTGTGTTGTGGTGTGTCGT	CAAGTTTGGCACCCAAGTCT	TGCAAGGGTGTAAATGCAAA	CTGCTAATGCCAATGCGATA	TGCAAGTGGAAGATTCATGC
tpk1Δ	CPAR2_804950	orf19.4892	TPK1	CGTTGAAAACGATTGTCCATT		cacggcgcgcctagcagcggATTGTGAAGTGATTGCGTAT	gcagggatgcggccgctgacAACTACTATGAAGCGGGAGCagctcggatccactagtaacg	gtcagcggccgcatccctgcAGAGCGGGGAAGAGTTGATT	GGGGGAAATGATGTGAGAGG	TTGGTGTATGGATGCAATGA	TGATTGGTGATTATGACACAAGG	GCCCAGGGTACAGGACTACA	ATCCCAAATGACCACCAATC
kin4Δ	CPAR2_801360	orf19.3751	KIN4	TCTCCTTTAACCAACAGATCTTGA		cacggcgcgcctagcagcggGCCGACATGCTTCTGCTGTA	gcagggatgcggccgctgacAATTTCCGCGAAGCGTGAGCagctcggatccactagtaacg	gtcagcggccgcatccctgcTGAGAAACACGAAGTGAAAG	TCCAAATCACATCAAACCAAA	CACGAGAAAATGGTTGTGTGA	TCTGAAGCTTTGGGGTTGTC	TTGGTCAGCGGTGTTGATTA	AGATGGTTTCTTTGGCGATG
kis1Δ	CPAR2_806320	orf19.4084	KIS1	GAAGGAACGAACGAACGAAC		cacggcgcgcctagcagcggCCTCCAGTCTCTGTATCCATCA	gcagggatgcggccgctgacAATAGCCTTCAACGTCTAGCagctcggatccactagtaacg	gtcagcggccgcatccctgcGTATGCACCATTGTAAAGTA	TCATCAAACAAGAGAGGTGGAA	GAGACCAATTGACAGAGAAGACAA	TCAAACAGATCTGGCAATTCA	GAAGTGGAGGTGATGCTGGT	TGGCTCCTCCTAATCCATTG
ste11Δ	CPAR2_211250	orf19.844	STE11	TCTCGGAAGGTGTTATTGGAA		cacggcgcgcctagcagcggGATAGGTGTGCTCATTATAA	gcagggatgcggccgctgacATCGAACGTGTGTCAAACGCagctcggatccactagtaacg	gtcagcggccgcatccctgcTCGAAGCAGTAAGAGGAACAA	TGGTTTCAAAGTTGATTGTGGA	GTTGGATTGGGTGGATATGG	TGAAACTTTTGGCTGGGACT	GGCATTGAATCCAAGAGCAT	TTGCTTTTCTGGGCACTCTT
yck3Δ	CPAR2_404320	orf19.2222	YCK3	TTCCAAAGACTCTGGCTGTTG		cacggcgcgcctagcagcggTGCATTTGTATTGGTGGAAT	gcagggatgcggccgctgacAAAGGAATCTGTCTCAACGCagctcggatccactagtaacg	gtcagcggccgcatccctgcTATAAATTGAAGGGGCATTG	CCAGTTCCCGACTCTGCTTA	AACACGTTTTCTTTTCGTCAA	TGGTCGGTTTAATAAGCAGCA	TTGGAAGACCAGACACACCA	TCCAAATCTCGGTCTTGTCC
hst7Δ	CPAR2_202440	orf19.469	HST7	TCTGCAAAGTTTGAGCATCG		cacggcgcgcctagcagcggAACTCATGTGTGGCCTACTT	gcagggatgcggccgctgacACATCGAGGGAATACGACGCagctcggatccactagtaacg	gtcagcggccgcatccctgcGGAAGCTAACGAAGCTGAAAA	GATGAGGGTGATGGGAAGAC	TCAAAAGGAATTGGCAATCA	TTGAGCATGTTGTGGGATACA	GAAACCGAAGCTTCAACAGC	TTCGTCATCGTCATCGTCAT
mss2Δ	CPAR2_502710	orf19.4001	MSS2	TTCCTCATACTGCTTCAACTGC		cacggcgcgcctagcagcggAAGCGTAGCATTGTGGGTAT	gcagggatgcggccgctgacATAGACACCGGGAATGACGCagctcggatccactagtaacg	gtcagcggccgcatccctgcTATATAAACAAAGGGCTCTT	TCATGGTCAACAGAACCAACT	TTGGTGGGAATGGTGATTTT	TGTTCAATTTGTTGGGCATT	GACAATGACTCCCCCATCAC	GCCCATTGCTTCATTTTGAT
cla4Δ	CPAR2_804640	orf19.4890	CLA4	ATTTGCATTTGCACCAACC		cacggcgcgcctagcagcggTTTTTGAGTTTAGCCCTAGCC	gcagggatgcggccgctgacAGGTAATATACACTCACCGCagctcggatccactagtaacg	gtcagcggccgcatccctgcGAATAAGTGAGAAATAGCAAG	TTCGGCGGGTAAATTGTATT	GGGTATGGTTTCACACTCTATGC	GCGCTTTCATTTGGAAAACA	TCACAATTTGGCATTGTCGT	TTGTGACTCCAGTGGTGAGC
swe1Δ	CPAR2_700800	orf19.4867	SWE1	GAGCCCATAAGACACCATCC		cacggcgcgcctagcagcggCGATTCCTCATGGTGGGAGC	gcagggatgcggccgctgacCGAGAGATGGTACACTATTGagctcggatccactagtaacg	gtcagcggccgcatccctgcCCGATGATGAAACGCAATAA	GGAGAATGAAGTTGGTGACGA	ATGACGCGTTTGTTGTGATT	CCCAATGCCAGAAAACTGAA	ACGGAAACCCAATACACCAA	GCAATTCCACAGGGTTGTCT
sip3Δ	CPAR2_108820	orf19.3047	SIP3	CGCTCCAAACTGTATTCACG		cacggcgcgcctagcagcggGATTCCCATCCCTATGCTAT	gcagggatgcggccgctgacAGTAATATCTAAGCACCCGCagctcggatccactagtaacg	gtcagcggccgcatccctgcTACTATGAGTGTTTGCCCTT	CGATGAGCTCTTTGGCCTAT	TGGCAATCACCACTCAGTTT	TTGTCCTTTGGAAATGCTACG	ATGCGTTATGCACCAAATGA	AAAGTCGGCTTGACCTGAGA
yck2Δ	CPAR2_806980	orf19.7001	YCK2	CTACTCCACCACCGACTGTT		cacggcgcgcctagcagcggATTGGACATGTAGGTGCGGG	gcagggatgcggccgctgacATATGTAGTGAACCGCCCGCagctcggatccactagtaacg	gtcagcggccgcatccctgcGTCATTAGTAATGAGTGGAG	CGAAATGATTCACTCTTTGCTG	ATGTTGTCGTTGGATGCTGA	GCGCTTGCTTCTTTGTTTTG	TCGTTGGCTTGCATTACAAA	TCATCCAATGCTGAAACCAA
mkc1Δ	CPAR2_800090	orf19.7523	MKC1	ACATGTTTCCCCTGTTGCAT		cacggcgcgcctagcagcggTTTGGATGTGCTGTGGAAGAA	gcagggatgcggccgctgacAGATTAGTTCAAGCGCCCGCagctcggatccactagtaacg	gtcagcggccgcatccctgcGCGTTTGACAATTTCAATCA	AAGCAAACCACGCGAAAGTA	TTCGGATCAATTTCTCACTGG	CTCGGTCAAGGCAATTCAA	ATCAAGGAGTTGGGTCATGG	GCATTGGGGAACAAGTGTCT
nrg1Δ	CPAR2_300790	orf19.7150	NRG1	AAATACCACAATCCCACAATCT		cacggcgcgcctagcagcggGTTGCTGCTGTTTATGGTAC	gcagggatgcggccgctgacTATAATCTTGGCGAACGGGCagctcggatccactagtaacg	gtcagcggccgcatccctgcGACGACGAAGAAAGGGGAGG	TTGCAGTATTCCTTGGTTCTTG	ACGTCAAGTACCACCACCAA	GGGTGACACGAAAAAGGACT	CCAAAGCAAGTGCAAGATCA	TTTGTGCTTACGCTCACCTG
wor2Δ	CPAR2_405400	orf19.5992	WOR2	GCACTCATACCCTCCTCCAC		cacggcgcgcctagcagcggTTTGCAATTAGCGATAATATGG	gcagggatgcggccgctgacAAGGATCTTTCAACAGCTCCagctcggatccactagtaacg	gtcagcggccgcatccctgcCATTCAAGAGGTGTGCTAGGT	TTCGTAGACAGGCGAGACCT	GGTTTGTTCCTGTGCAACTT	GCCCGCAATTCACATAGTTA	GCAACCAGATGGGGCTATAA	AAGGGCATTGTTTTCGTCAC
tec1Δ	CPAR2_805930	orf19.5908	TEC1	CCCCAATCTCACCAGATTTT		cacggcgcgcctagcagcggAGCGTGTATGAACTCATCTT	gcagggatgcggccgctgacAATGACGAGGAAGTTGCTCCagctcggatccactagtaacg	gtcagcggccgcatccctgcACGCTTCTTTTCCTTTCACATTC	CCACTATCATACGACCAAGCTG	CAACAAATTCGGATGTCAAGG	GATTTGCTTGGCTGGTGATT	TGATGTTGGATCTGGGTTCA	TATAAAGTGCGGCGGGTATC
csr1Δ	CPAR2_403080	orf19.3794	CSR1	CCATTGCAAAGAAACATGGA		cacggcgcgcctagcagcggCGTCATATCATAAACCAACT	gcagggatgcggccgctgacACATTTAGGGAACGCAGAGCagctcggatccactagtaacg	gtcagcggccgcatccctgcGGTAGCATAGAGACATTTCT	CGCCTTGAACACGTTTGAT	CAGCGTTCAAAAGCATCAAC	CGCAAGTCAGTGAGTGGGTA	CCAAAGTGCAGCGAATACAA	GTGACTTGGTAGCGGATGGT
aaf1Δ	CPAR2_404190	orf19.7436	AAF1	CCCCTCCTTCTTCCAAAGAG		cacggcgcgcctagcagcggGGGCAACATGTTTTCAAACAAC	gcagggatgcggccgctgacAAATGGGCTTCAAGATGTCCagctcggatccactagtaacg	gtcagcggccgcatccctgcTGAACAGAGGAAGTGATGAT	CATTTTGCATTTGAATATGTCG	TTGAAGAAACTTTTTCCCATCC	GGTGTTGTTCGAATTCAGAGTG	TAGTCAGCGCCAATCACAAC	ACCCGAACCATTTCCCTTAC
tup1Δ	CPAR2_109520	orf19.6109	TUP1	TCGAAGCAACATTTTGAAAGAA		cacggcgcgcctagcagcggATATTATGAGGAAAGCAAAAATG	gcagggatgcggccgctgacAGATGTAGACCACCGTGTCCagctcggatccactagtaacg	gtcagcggccgcatccctgcGAGGAAGGAGAGAGCAGTTG	AAATCAGGCGATGTTGATGC	CGTGAATGTCGTGAAATTGG	ATGGTGAGGTAGGCAACTGG	TTCCACCACCAGTTTCATCA	GAATCCCAAACACGGACTGT
cph2Δ	CPAR2_603440	orf19.1187	CPH2	AACATTGTTTGTACGCTTTACG		cacggcgcgcctagcagcggTATCTGGATTTGCGTTCGAT	gcagggatgcggccgctgacAGAGTACAGCACCTAGTTCCagctcggatccactagtaacg	gtcagcggccgcatccctgcTTGTTGCTTTACAAGGGAAAGA	CCCAAAGGTATACTGCATGG	CCGCATGCAAATCAAAAACT	CGATTCCACCACAATTCCTC	CAACCGTTGTATGCCACAAG	TCACCTGAACCACCAAACAA
rim101Δ	CPAR2_700450	orf19.7247	RIM101	CGCACACACTCCCAACAATA		cacggcgcgcctagcagcggTGCATTCAAATACGAGACAGG	gcagggatgcggccgctgacATACCCACGGAAGTTGCAGCagctcggatccactagtaacg	gtcagcggccgcatccctgcGAGGAAGTTGATGAATTGAAA	TGGAACATTGGTGAAAGCAA	GGGGGTCCTTGCTATATGTG	GGAGAAGAATGTCGCCAAGA	GCTCAGCTTTGACTGCCTCT	GATGTCCATTGGCAACAGTG
ndt80Δ	CPAR2_213640	orf19.2119	NDT80	AATCAAAGAACAAGGTCGGTTT		cacggcgcgcctagcagcggGCCACTACCATCATCATTAGCA	gcagggatgcggccgctgacAACACGCAGTAATTCCGAGCagctcggatccactagtaacg	gtcagcggccgcatccctgcGTAGTGCTTCGCCTGCAGTT	ACCCACTCGCGACTCTAAAA	TCATCATCCTTCAAACTCATTG	TAGCATCCGGAATCTCCATT	CACAACAACAAGCGCAAACT	AGCTGGGTAAATTGGTGGTG
cas5Δ	CPAR2_400410	orf19.4670	CAS5	AATCATTCTTTCCCATCATAGAGA		cacggcgcgcctagcagcggTGAAATAGTCGAATCATCAAACG	gcagggatgcggccgctgacACCCAGTAGTGAACAGGAGCagctcggatccactagtaacg	gtcagcggccgcatccctgcACGAACGGGGAAGGAAAATCA	GCGTCAACGCATTTTAGAGA	TGCTCTTTCCCATGTACCAA	TGTTGTGGTTCAGGACAAGG	ACAATTCTCCACCCAGCAAC	CTCAGCCAGCAACAAATCAA
ssn6Δ	CPAR2_808810	orf19.6798	SSN6	GGGTTTGAAGCAAATGTCGT		cacggcgcgcctagcagcggTGCAAGTGGAATCTAATCGG	gcagggatgcggccgctgacAATCATTCGGAAGGAGCCGCagctcggatccactagtaacg	gtcagcggccgcatccctgcTGAATAAAGGAAGACTTTGTCTC	AACTCCTCGTGGCAAACATT	CCGACTGGTAATCTCACAACAA	CGTAAGTCATGGCCCAAGTA	AACAACCTGGTCAAGGCAAC	AGTCGGATCAATTTCCAACG
cup9Δ	CPAR2_301340	orf19.6514	CUP9	AACGCCGTTTTAGGTCAGC		cacggcgcgcctagcagcggAAGTTGCATATTGTTGTAGC	gcagggatgcggccgctgacAATTATGTCGAACGCGCCGCagctcggatccactagtaacg	gtcagcggccgcatccctgcAGAACAGAAGCGTATGATGCAC	TGAACCGGGTCCGATATTT	CAAGGTTTGAAGGAAGATCCA	TTTTTGCATCAAAATTGCACA	CTCCTCCACCTACGCAGCTA	GCCAACGCAACAAGACATAG
sfl1Δ	CPAR2_205120	orf19.454	SFL1	CGTGCATACATTGTTGCGTA		cacggcgcgcctagcagcggGCACTTTAGACATCTGTGTT	gcagggatgcggccgctgacATAGTATCGGAACTCGCCGCagctcggatccactagtaacg	gtcagcggccgcatccctgcCGTTCGGAATAATGTACACA	GATGATGATAAACTTTCGGTGGA	GATATTAGGCGACCGGCTTC	TTGTCCATCGATGAAGACTCA	AGGGAGCAAAAGATTGCTGA	TCTCTGTGGTTTCCGTAGCC
fgr15Δ	CPAR2_213110	orf19.2054	FGR15	ATAGGCCCCTGTACAAAGCA		cacggcgcgcctagcagcggACCCAAGCGTAATACGTAGC	gcagggatgcggccgctgacATTCGATGGGAACGATCCGCagctcggatccactagtaacg	gtcagcggccgcatccctgcCCAGCTTCTTCATAAACGGA	GCCAGCAACTTTGGTTGACTA	AAATCTCCCACCAAAGAAAAA	TGATTTTTGGGAACAACGTG	AGGATTTGAATCGCACCAAG	GGTGCATGAACTGGCTTTTT
wor1Δ	CPAR2_805000	orf19.4884	WOR1	TGGCAGAAGGAAACTTGAAA		cacggcgcgcctagcagcggATTTGAAGCAACTGCTTGAA	gcagggatgcggccgctgacAGAAGGTCATCGAACTCCGCagctcggatccactagtaacg	gtcagcggccgcatccctgcCACTTTTGGAGACTGCACAAT	GCACAAACACGTTGTGGTTA	TGGGTTGGTATTGGTTAGACG	CGTCCATCAATATTGGACAAA	TTGACCACCACCACAAGTGA	CCCGTCTGGGGTATTATTCA
efg1Δ	CPAR2_701620	orf19.610	EFG1	TTAAACGCCGACTGGAAATA		cacggcgcgcctagcagcggGAATTTAAATACAGGTAGTTG	gcagggatgcggccgctgacACATAACTTTCCAGAAGCGCagctcggatccactagtaacg	gtcagcggccgcatccctgcAGAGGTGCCATCGAAAGAAG	AGTGCCCGATGAAACAGAAC	CAAACAAGACAAACCGTCCTG	GCAGAGCGAAAGAGCAAAGA	CACAACACGCAACTCCATCT	GGTAGCCGTACGGTTGTTGT
czf1Δ	CPAR2_501290	orf19.3127	CZF1	CAAAGATAAGCGGGAGTCAA		cacggcgcgcctagcagcggTCATGTTTTGTAATAAACGT	gcagggatgcggccgctgacATACTCACTGAAGGTCCGGCagctcggatccactagtaacg	gtcagcggccgcatccctgcGTAGAGTAACTCTAAGAGTA	TTGTTGGTTGTCAAAAGAGCA	AAAAACAACAATTGCCCTTCA	TCGCAATTTGACGATTCCTT
efh1Δ	CPAR2_104660	orf19.5498	EFH1	TGGTCGGTATCCTTTTCGAG		cacggcgcgcctagcagcggTTATTCACGTGTGTAGTGAT	gcagggatgcggccgctgacAAGTAGACTGAACTCCGCGCagctcggatccactagtaacg	gtcagcggccgcatccctgcTAAGGCAGTTGATTTTGGCTAA	TGGCTCACGATGAAAATCAG	AAACTGGGCCGAAAAAGATT	ATTGGAAAAGTCGGTCGTTG	AGCCTCTTCAGTGTCCTCCA	TGGTATGCAGCTGCTAATGG
brg1Δ	CPAR2_107940	orf19.4056	BRG1	CTTGTGCAGGAAGGCAGAGC		cacggcgcgcctagcagcggCTGACATTGATTGGATACTA	gcagggatgcggccgctgacAATACTCTGGGAACAGGCGCagctcggatccactagtaacg	gtcagcggccgcatccctgcAAGATTTGGCGGCTGGTTTTG	AATTTTCACACACCCCTCAA	CGTTCCGTGAATCGAAAGTT	GCGTTACAAAAACTGCCACA	TTGCGCTCAACAATTCAAAC	TCTCGCTTCTGTGATGATGC
bcr1Δ	CPAR2_205990	orf19.723	BCR1	CACAGCAGATACACCCGTCA		cacggcgcgcctagcagcggATTTTAGCTTCCGTATCAAG	gcagggatgcggccgctgacATACTCTCGGAAGGTTGCGCagctcggatccactagtaacg	gtcagcggccgcatccctgcTCGAGGAAAGTGGGGATGTA	TCCCGTTGGTTCTGTTTTGT	TTTTCCAGGACTGGATGAGC	CCACTGGATCTCTCTCTGACG	AGAATCAGCTGCCCTGTCAT	GCTGCTGTTGATCCACTTGA
upc2Δ	CPAR2_207280	orf19.391	UPC2	GGTTCCGAGTTCGTCGTATAA		cacggcgcgcctagcagcggATTGAACCAAGACGCGCGTA	gcagggatgcggccgctgacAATCGCTTTCAACGGATCGCagctcggatccactagtaacg	gtcagcggccgcatccctgcTGAGATATGGATGGGAAATG	AGCTCCACTATGCACGTTTT	AGCAGCACCCACACCTCTAC	TGGCTGTCACTGACTGTGGT	CAGGGAGGAGTTCCATCAAA	GATGACTGTGGCTGTGGTTG
ace2Δ	CPAR2_204370	orf19.6124	ACE2	GGCAAGTTGATTGCAAAAGA		cacggcgcgcctagcagcggCTCCATGGTTGTTGGATGTT	gcagggatgcggccgctgacAAGATAGTCGCCGAACTCGCagctcggatccactagtaacg	gtcagcggccgcatccctgcGTGAAGAGCTAATTCTGAAA	CCATTTGATTGTCCCAAATGT	TGCCGTCTCATATTCAATCAA	ACCAAGATTTTTCCCACAGC	ACCCAAGTGACGACGATGAT	GGTGTTGCTTTTCTGGCAAT
cph1Δ	CPAR2_208600	orf19.4433	CPH1	GACCACAACAAACAGAACAAACA		cacggcgcgcctagcagcggTGTCTGCGTTGCTGTCGACA	gcagggatgcggccgctgacAAGAGTCATTAACACCTCGCagctcggatccactagtaacg	gtcagcggccgcatccctgcCTGAGACAACTTCTTCCACT	TGCCAATTGGACAGCATCT	TGCTCAATAGTTCCTCTTTCG	TGATGAAGTGTATTTGCTCTGGA	GGCTGATGCCTTAGAACGAG	TCCAAGGGGAAGTCATCATC
cap1Δ	CPAR2_405030	orf19.1623	CAP1	CCTATGGTCGTGTATTTCGTG		cacggcgcgcctagcagcggACGTTTGATATCAGTCATTT	gcagggatgcggccgctgacAATTGATGGGAAGTCCTCGCagctcggatccactagtaacg	gtcagcggccgcatccctgcGTAGGTGAATTTAGTGTTGT	GGAAGAATCCTCCAATGACG	TCAGACAGAAGCCTGGTTTAAG	TACGAATCGAACGTCAGCAA	GTCGAAGCGTACAGCACAAA	AGACCAAGGCGTACCAAATG
gzf3Δ	CPAR2_800210	orf19.2842	GZF3	TCACACGTGGCCACTAAAAA		cacggcgcgcctagcagcggCATGGTTGAAGTAATAGTTA	gcagggatgcggccgctgacATAAGTCGTAGGAATGTCGCagctcggatccactagtaacg	gtcagcggccgcatccctgcTAGAGAAAGGGGGAGGAGGA	TGGATGGATCAGTATCTTCCAA	AAGCACCAAACAAAAAGATCG	TCGCTTGGTTAAACTTGTTGG	CTCGTTGCACCATACACCAC	TGCTCTGAGCCAATTTGTTG
mig1Δ	CPAR2_101340	orf19.4318	MIG1	TGAGTTAAGCTTCATCCTGCAT		cacggcgcgcctagcagcggCTTGAAATGAGGGTCTAGTG	gcagggatgcggccgctgacACAGCAAAGGAAGTTGTCGCagctcggatccactagtaacg	gtcagcggccgcatccctgcTTGTTGAGCTAGAAAAGAAA	CCGAGTGTCTGATTGCCTTC	CCACATCGTGCACTGAAAAA	AGTGGGGTGGGGTTCATATT	GAGCAGAGAACCCACACCAT	AAGCATCGCTGTCTGGAGAT
rme1Δ	CPAR2_212670	orf19.4438	RME1	TCCGCCCAATTATGTTCTAAA		cacggcgcgcctagcagcggGATAACGAATAGCTATAGGA	gcagggatgcggccgctgacACGCGAATAGTGTTCAAGGCagctcggatccactagtaacg	gtcagcggccgcatccctgcTAGTTGATTGCTTGTTTTGTA	CATGGAACGTGTTGTGTGAA	TCGCATTTGCTCAACAATGA	TGGCATTATTCAGAAACACGA	CACAAGCTACCCCGACAAAT	CTCCGAAACACCCTTGTCAT
hap2Δ	CPAR2_208290	orf19.1228	HAP2	GCACCTACGACAAAGGTCAA		cacggcgcgcctagcagcggCATATTTTTTCAATGCAAGA	gcagggatgcggccgctgacACAGTCATGGAAGTTAAGGCagctcggatccactagtaacg	gtcagcggccgcatccctgcGCTGATAATAACACTATTGA	GTGCTGCTGCTGGTGGAT	TGATGCGCCATGATTGTTAT	TTGCGTACTTCATCAGTATTGG	CGGTGGTGTATCTCCGACTT	GCATGTCATTATTGGCGGTA
hap5Δ	CPAR2_100540	orf19.1973	HAP5	AATTGGGGATTCATTTGTGC		cacggcgcgcctagcagcggGTCCATATTCAAATCAAAA	gcagggatgcggccgctgacAACGTATCGGAAGCATAGGCagctcggatccactagtaacg	gtcagcggccgcatccctgcAAGTGAGGGAAGTCAGCTGG	ACACGACCGGATTTAGCACT	TGTTTTCCCCAAAAACACAA	AATTGACAAAATGGCCTTCC	CGCACTTACCTCCCCATTTA	GCCAATGGTAGCTGATGATTC
gis2Δ	CPAR2_303450	orf19.3182	GIS2	CCCAACCCTTTGCTCATACA		cacggcgcgcctagcagcggCTTTATCACTTGTAAAACTC	gcagggatgcggccgctgacACGTATAGCATAAGGTAGGCagctcggatccactagtaacg	gtcagcggccgcatccctgcGATTAAGTTAGTACATCTTA	AAACATTGATCCGCCCATT	CAGCTCAATCCGAGCAATTA	TGACAGTTCCGTTCAATCCA	GTCCTAACCAAGCCCAAGGT	GTGACCTGGTTTACCGCAAG
hap3Δ	CPAR2_400930	orf19.4647	HAP3	TTGTGCAAATGATCTCAAATGT		cacggcgcgcctagcagcggTGCTAACGAATTGCACAGTT	gcagggatgcggccgctgacATATGACCTGAACCGACGGCagctcggatccactagtaacg	gtcagcggccgcatccctgcCGTGACTGGAGGTATGAAAT	TCCACAATCGCAGTTTCACT	TGCCAGATCCAAGATTTTACG	CACCATGCCAGTTGAACGTA	CAAGCAGCCGACAGATGTAA	CTGTGGCTGTTGTTGTTGCT
sfu1Δ	CPAR2_700810	orf19.4869	SFU1	CCAAGCTCGTCAACAGGATT		cacggcgcgcctagcagcggAGGCATTATATTTTGAAATG	gcagggatgcggccgctgacAAATGCTCTTCAACTACGGCagctcggatccactagtaacg	gtcagcggccgcatccctgcACTGAAGAAGTTGAAGGGTG	TCTTCCTTCTTTTTGGCCTTT	AATGCAACACTCAGCCATTAG	GAGAGGGAAGGGGCACTATC	AAGTCGCCCAAGATTGAAGA	TGTACTGCCAAAGCAAGTGG
hap31Δ	CPAR2_202040	orf19.517	HAP31	ATGGGTGGTGGGATTATGAA		cacggcgcgcctagcagcggCCATAATGTGGTGTATTATA	gcagggatgcggccgctgacATACTTGCGGAAGCTACGGCagctcggatccactagtaacg	gtcagcggccgcatccctgcGTTTGGATAGTTTTCTTCAA	TGTTTTTCCCTTTTCGCAAC	GGGCGATACGTTGTACTGCT	TGACAAACCCAGTCACCAAA	CCACCCACAGCTAAAGTGTC	TTGTTTCGCCTCTCTCTTGC
hap43Δ	CPAR2_209090	orf19.681	HAP43	ACTTTTTCTGTCCCATTTTGTG		cacggcgcgcctagcagcggGGTCATTTATATATAGTTAG	gcagggatgcggccgctgacACAGCGATGGAACTTACGGCagctcggatccactagtaacg	gtcagcggccgcatccctgcTTGAGATGACGAAACGTGGA	CAACGACTGGTTCTGGTGAA	AAGGGGCTGTCCTTTTTGTT	GAAGCGAAACCAAGGAAGAA	GCAAATGTCACCACGACAAC	ACGAAGCGTTACAGCAGGTT
sef2Δ	CPAR2_303270	orf19.1926	SEF2	AGCAGTTTGCGATATTCGGTA		cacggcgcgcctagcagcggCATGGAGTTATATTAGCTTG	gcagggatgcggccgctgacATAATACGTCTGCAACCGGCagctcggatccactagtaacg	gtcagcggccgcatccctgcGAAATAGCATAGACGTTGCA	ATGACCCAATCATTCCCAAG	AGGAAAAGGTCCATCGTCAA	CAGCCACGGTTAGAACAAAGA	TCGCTTGTGGTTGAAAAGTG	CAGAACCAAATGCATCATCG
hap1Δ	CPAR2_501640	orf19.4145	HAP1/ZCF20	GGCAACGGAATTCTTACTGTG		cacggcgcgcctagcagcggCACCATGTTTGCAGGGGAGG	gcagggatgcggccgctgacAAGATACCGTAACATGCGGCagctcggatccactagtaacg	gtcagcggccgcatccctgcAGTATAGACTAAATGATAAG	TTGGTAACTCAACAATGTGTTTTT	TTTGATCGGACTTGGGTAGG	AAAGGAACGCCATGAAACTG	TACCCTTTGCACCATTGACA	TTCGGCAGAGCCAGTATTTT
cpar2_404850Δ	Cpar2_404850	N/A		TGAGGAGCTGTGCTGCTTTA		cacggcgcgcctagcagcggTGTTCGTAATTGGTAATGAG	gcagggatgcggccgctgacACTAATCTTGAATTGGCGGCagctcggatccactagtaacg	gtcagcggccgcatccctgcTATATATATCTTTGCGTATG	TTGCCAGTTGGTAGATCAGTTG	TGGAAGCTTTGTGTCTCGTC	GGATGCTGAAGTTTTGTTTGC	GTTACTACTGGGGCGGCTATT	GTAGTAGTTGGGGTCGCTTCA
cth1Δ	CPAR2_407950	orf19.5334	CTH1	TCGGAGAAGAAACTGGTGGA		cacggcgcgcctagcagcggACATTTTTCAACCAGAAAAT	gcagggatgcggccgctgacATATCCTTGGAAGCCTGGGCagctcggatccactagtaacg	gtcagcggccgcatccctgcAAGTATGAAACTATGTAGCAT	GCAAGTTCTTATTGAAAGCGAGA	GCTTGCATTTGATTGGTTGA	CGGCATTTCTTGAATCAGTG	TGGCAAACGTCGTCTAATGA	GATTGAGGGGGTGAAGTGTC
flo8Δ	CPAR2_601080	orf19.1093	FLO8	TCTCCCTCTTGCTTTTGGAA		cacggcgcgcctagcagcggGTTCATTTTCTAAGAACAAT	gcagggatgcggccgctgacAGCCTAAGCACACTTTGGGCagctcggatccactagtaacg	gtcagcggccgcatccctgcATGGCGACTAGGAGAGAGAA	GGTGGAATTTTGAAGCTTGG	ATTTTGTGCGCATAGACACG	CATGGCCATCACTAACCTCA	CCGGCATCCATGTCTAGTTT	CTGGACCACCAAGTCCAGTT
ume6Δ	CPAR2_803820	orf19.1822	UME6	TCTCAACCAGTCACCCAACA		cacggcgcgcctagcagcggACCATACGTGGCGACGAAAT	gcagggatgcggccgctgacACATGATAACCCGTACTGGCagctcggatccactagtaacg	gtcagcggccgcatccctgcTAGTAAGAGTATTTTCAACC	TAATCCACATTCCGGCTGTT	TTGATCAGCTGTGCGTTTTT	CCTATACCACACGGAGAAGCA	TTGACCCCACACTTCAACAA	TGACTCGTTCGCTGAAAATG
sko1Δ	CPAR2_110380	orf19.1032	SKO1	GGGAAAGATGAAAATAAGAA		cacggcgcgcctagcagcggGACTCACGGGGTATAATTCT	gcagggatgcggccgctgacATCATTAGCAGAGCAGTGAGagctcggatccactagtaacg	gtcagcggccgcatccctgcTGAGGGACGATGATACCTAA	CTGATTTCAAATTCTTTCTA	GTACGTTTTCAACACCGAAG	GGCAATCTTGCCCAAAAGTA	GCTCCGCTTATTCAAGCAAC	TCCATTCAAAAGTCCACTGG
fcr3Δ	CPAR2_303540	orf19.3193	FCR3	CACAACGCTACACACATGGG		cacggcgcgcctagcagcggTTGCTTGTGAAAAAGTGTGT	gcagggatgcggccgctgacCAAGATACGTTTCCGAAGTGagctcggatccactagtaacg	gtcagcggccgcatccctgcTGTAGTGATTGGGCTGGATT	CAACTCTGTTGTAACCTTTA	CAGCGATATTACATGATGAG	AACTCACTTGTTTTTGGATT	ACAGCAAGTGAATCCCCATC	ATTGCGGGAAATGAAACTTG
sef1Δ	CPAR2_801430	orf19.3753	SEF1	ATATTAAAACTTCATTAAAT		cacggcgcgcctagcagcggGGTGAAGGGGTGTATTAACG	gcagggatgcggccgctgacCAGCGATACGCATGTGTACGagctcggatccactagtaacg	gtcagcggccgcatccctgcAAGTGGAGCTAGGGGGGATG	GCTTTTTCCCAATAGGAATA	CTTTGAGGGCGAGAGCGACA	CCCCTCTCGACTTTTGAACA	CACCTCGTGCACATTTTGTC	GTGTATAGGAGTATTTGTTT
rbf1Δ	CPAR2_600470	orf19.5558	RBF1	ATTTGCTTGTAGTTTATTTC		cacggcgcgcctagcagcggGAGGTTGATACTTTAGTTCA	gcagggatgcggccgctgacAACACGCTTTAACTACTGCGagctcggatccactagtaacg	gtcagcggccgcatccctgcGAGGGGGGGGAACTGGTGTC	CACTTTAATTTGCAAATGCT	AGTGTTGCATGGGCAAGATG	ATTGATTTCCCCCTATCAGG	AAACAAGAAGGCAACGATGG	TTGACTCAAATGGCCAATCA
cwt1Δ	CPAR2_204560	orf19.5849	CWT1	GAAAGTGGTGTTACCGAAGG		cacggcgcgcctagcagcggATGGCGATGCTTGTGTTGCT	gcagggatgcggccgctgacCTGATCGAGAGATAGTTACGagctcggatccactagtaacg	gtcagcggccgcatccctgcATGAGACAGCTTTGTTATTA	CACTCCGGCTGTTCTTGGAT	GGATGATTACTTTAGAGCAT	TGTCATCCACAGCCATCACT	ACCATCCAACTCCAGACAGC	AGTTGTTGGATCGGCTGCCG
mnl1Δ	CPAR2_204380	orf19.6121	MNL1	AGTTTGTTTAGCTATATAAA		cacggcgcgcctagcagcggAGCAGAAAAGGGAGTGTTGA	gcagggatgcggccgctgacCTCTTAATTGAAGGTGGTGCagctcggatccactagtaacg	gtcagcggccgcatccctgcGTGGCAGAAAAAGTGATGGC	GTTTGTTAGAGTTGATGCCA	TTAGACAATATACGGGACTT	CAGGCCCAACCAAGGATAAG	ATGGGTGATCGGAGTCAGTC	CACTTGACGCTTGTCCAGAA
fgr27Δ	CPAR2_302880	orf19.6680	FGR27	ATGCTTGTAACACTCTCGCC		cacggcgcgcctagcagcggTGAGGGAAAGGTAGTGAGGT	gcagggatgcggccgctgacATTGCTCGACGGCTACGTGTagctcggatccactagtaacg	gtcagcggccgcatccctgcTGAGGTGAGGTAGTGGGTAA	ATGACAGAACCCATGAGGAT	AGGGACAAAGGGGGGTCTTC	CAAGGTAAAGGCATATCAAC	CGCAACAATATCCACCACAG	CAAAGGATGGAGCACCGTAT
fcr1Δ	CPAR2_808620	orf19.6817	FCR1	GGTCATTCATCTGCAAAAAC		cacggcgcgcctagcagcggTTTATCTCGGTTCAAATTTG	gcagggatgcggccgctgacCCTCCGAACTAAGAAGGTTAagctcggatccactagtaacg	gtcagcggccgcatccctgcGTTATTGTTTCGAGGCTCTT	ATCCCTCATCCTGTTTTGAG	ACTGAAAGTAAAAGTCTCAT	TCAATCTAGATGCACCACAC	AGCCAATTTCTCCAGCTTCA	GGTGATGGGCAATACAGCTT
crz1Δ	CPAR2_807110	orf19.7359	CRZ1	CGTCACACCATATTGTAGAG		cacggcgcgcctagcagcggGGTACAATTCACTTGTATAC	gcagggatgcggccgctgacAGTTAGCACCCACATTTGGCagctcggatccactagtaacg	gtcagcggccgcatccctgcCCTATGTGGGGATATGGTAT	ATCCACAATGGACAAGTATCG	GCTTTTCCACCCAAGCTAGA	TCACCTTCTCCATTCCCAAT	GATTAGAATTTGGCGCTGGA	CTGTTGGTTCGGGACAAGTT
mrr1Δ	CPAR2_807270	orf19.7372	MRR1	AAGGTCAAGCATACACTACT		cacggcgcgcctagcagcggGGCTGTTTGATTCTAGGCTG	gcagggatgcggccgctgacCCGGACGATAAAGATTCTCAagctcggatccactagtaacg	gtcagcggccgcatccctgcATTGTATTGTACTGTACTTA	TCGCCAATGATGTTGACCCA	ACAAGTAATCAAAACACGGG	CTCAGATTGAAAGTCCCACCA	CAGAAATTCGGCCGTATGAG	TGAACTACTAATTGGGGACT
cta4Δ	CPAR2_405260	orf19.7374	CTA4	TTCTGGTTTTTTTCAATCTT		cacggcgcgcctagcagcggGGTTGATGGTGGTCATAGAC	gcagggatgcggccgctgacTCGAGCATAGAACGCGAGACagctcggatccactagtaacg	gtcagcggccgcatccctgcAAAAGAAAGGGATATTGGAT	ATAAAACGACGTCAACAAAG	ACGTGCTAAGAACGAGGGTC	GAAACCATCGACGATGCATC	ATTGCCCTTTGCTTCATTTG	AACGCTGCCCATATTTTACG
isw2Δ	CPAR2_404600	orf19.7401	ISW2	CAAATACATTAGAGATCGAT		cacggcgcgcctagcagcggACTGTGAGAGTGTAGATTTG	gcagggatgcggccgctgacTCCAGGCATATCCAGAGCAGagctcggatccactagtaacg	gtcagcggccgcatccctgcAAATGACGAGGACGATTTTA	GGTTAGTTGGACAGCAAATA	ATCGGGGATTTTTCAACCTG	AAGTACGTCAAGATTGTCTT	TTTGACTTCGGCTGATGTTG	GGTTTCCCGAGTTTTCCTTC
stp4Δ	CPAR2_211740	orf19.909	STP4	TAATGCGGAATATGAAGGAA		cacggcgcgcctagcagcggAATAAGGTATATGGTTTAGT	gcagggatgcggccgctgacGCCATCCATACAAGGGTAGAagctcggatccactagtaacg	gtcagcggccgcatccctgcATGGGGAAAAAAAGAGGACG	TTGTGGACCGGAGAACTACT	GATCCGGATAAAGGATTGAT	TTAGTTGTTTCGTAGAATCG	TCAGCAGTTGTTTTGCCATC	GAGGAACCATCGTGGTCAGT
cas1Δ	CPAR2_804490	orf19.1135	CAS1	ATCAACTTCACAAACATTAT		cacggcgcgcctagcagcggGACTTTTGTAAAAAAAAACG	gcagggatgcggccgctgacCCAGCGGATATGAGATTCTGagctcggatccactagtaacg	gtcagcggccgcatccctgcAGAAAATAATAGTTTGACGG	TAGAGCTATTACATTAGGTA	ACTGATAAATCTATAGGTCA	CAATAGCCCTTCTTCTAGAA	AGGGGTCGTTCAAGACACAC	CCCAATTCAAACCCCTTTTT
ada2Δ	CPAR2_210550	orf19.2331	ADA2	CTTTAATGTATGTTACTCTC		cacggcgcgcctagcagcggGAATGTGTGTGTGTGTGTGT	gcagggatgcggccgctgacGCAGCGACTACGTTGCACATagctcggatccactagtaacg	gtcagcggccgcatccctgcTGCTATCTTTCCTAGACGGC	TCGAGGAAGAAGATCTGTCA	TTGATTGGATAACGGCAATT	CCCCACAAAAACCAACCTTT	CATTCGGTTTGGGTAATTGG	CTTCCTATACTCAAGTAGAT
rfg1Δ	CPAR2_801100	orf19.2823	RFG1	CTTTTACACAAAGCTAATAT		cacggcgcgcctagcagcggTTATCAATGTATATCAACCA	gcagggatgcggccgctgacCAGAGTTAGCGACATCGTAGagctcggatccactagtaacg	gtcagcggccgcatccctgcATGATGAAATTGTGAGAGAG	GGTTCAATTAAAGGGGGAGG	TATAAAAAAGGGAAACGTAA	GAACTAGGGGCACAGACCAA	TCCCACTGATGCTAATGGTG	TTGTTTGGCTAGTTGTTTGG
siz1Δ	CPAR2_109320	orf19.3345	SIZ1	ATCATCACCGTAAGATTTTG		cacggcgcgcctagcagcggTTTTCCATCGCTGGGTAACT	gcagggatgcggccgctgacATATCACACGTCACTCATGGagctcggatccactagtaacg	gtcagcggccgcatccctgcTAACAATCGTTCACCTCAAA	CTGTGGACGCTTTAGTGTTT	CACATATACGCAAACAAAAT	GATCCTTCCTGCACATCACC	GACTCACACCCGGTAAAGGA	AGGGCCAAGTAAATATTCCG
bre1Δ	CPAR2_304220	orf19.976	BRE1	GGTTCTGGCATCACGAACTT		cacggcgcgcctagcagcggCATTCATTGTGAATTCTATTTG	gcagggatgcggccgctgacATAGTCCGGGAACTGTATGCagctcggatccactagtaacg	gtcagcggccgcatccctgcGTGAAATGTTGTCGTTGCTG	AAACTCACCAACCAGCCATC	TCCCTCATCAAAGAATCCAAA	ACGACCTTCGATGGCAAA	GCAGCAATTGAGCAAGAGTG	TCTTGTGATTTCGCAACCTG
crz2Δ	CPAR2_203050	or19.2356	CRZ2	TTCACTTTTGGGCAGCTATACA		cacggcgcgcctagcagcggGATGCTAGTCTGTTCAAGAG	gcagggatgcggccgctgacAAGACGACGTAAGCCCATGCagctcggatccactagtaacg	gtcagcggccgcatccctgcGATTGCATTTCTTTCAGTTC	GTATTCAAATTATTCAAAGAGCA	GGGAATGCCGTTCTCTTAAA	TAATGGTGAAGGAGCCAAGG	CACAGCAATCACTGCAACAA	TGAGCGCAGGTAGAGTGTGT
cfem1-4Δ	CPAR2_402920	orf19.5636	CFEM1	TAGAGGAGTCGGGATTGCAC		cacggcgcgcctagcagcggGACTGCGGGTGTGGTGTTGA	gcagggatgcggccgctgacATAGACCTGGAATCCGTGGCagctcggatccactagtaacg	gtcagcggccgcatccctgcAGAGCAATTTTTGTTATACC	CATTACAGCGAAAGGCGTTA	TTGATTGGCGGAAATATCGT	CCCCTTTTTGTTGTTGTCGT	CTGCTGAAGAGGAGGGTGTC	TTTTGCGGTAGCTGACTCCT
	CPAR2_402910		CFEM2									TCCCACAATGTGCTCAAGAA	GGGTAGTTTCAGCAGCTTCG
	CPAR2_402900	orf19.5635	CFEM3									CCATATTGGGATACCGGTTG	GGAGCAGTAACCCATTGCAT
	CPAR2_402890		CFEM4									TACCCGCAAGTTCCAAAAAC	AAATAGACGCAGGCATCCAC
cfem5,6Δ	CPAR2_300110	orf19.7114	CFEM5	TTCTTCAAGCACTTTTCCCATAA		cacggcgcgcctagcagcggCTTGCTAAGCGATTGAGGTG	gcagggatgcggccgctgacAATATACTTGAAGGCGTGGCagctcggatccactagtaacg	gtcagcggccgcatccctgcGATGATCTTCATTCTTCGGT	TTGCAGTTTCTGCTTCAACG	AGATTCTGCGTCCTTTGAGC	CAAAGCTACAGCCATTTGAGTT	TTCCACGTTAACCACAACCA	CTTGAGACGCTTCAACAGCA
	CPAR2_300120		CFEM6									CAACAAGTGGATGGGGACTT	TGGTTGTGGTTAACGTGGAA
cfem7Δ	CPAR2_500080		CFEM7	GCGACACCCTTACATCTCGT		cacggcgcgcctagcagcggATATCTTCATGGCTTTGTGT	gcagggatgcggccgctgacAAGCTCGTCGAATAGTTGGCagctcggatccactagtaacg	gtcagcggccgcatccctgcATCTGCTTGTGTAGATACCA	GCGATACCGGGTAACACTTG	TGATCTGGTGGGATTCCTTC	TTGCCTTTTGTTGCATTTTG	CAAAGACCGCTTCCATCAAT	CAATGAGGTTGCTGAACGAA
tpk2Δ	CPAR2_406480	orf19.2277	TPK2	TGTTTTGTACATAATATATA		cacggcgcgcctagcagcggTGACTTGTCTTGACTGTAAT	gcagggatgcggccgctgacTGACTATACACAGATGTCCCagctcggatccactagtaacg	gtcagcggccgcatccctgcACCCTACAATTGATACTGAT	AAGATCAACGTCTACTCTAC	ATCGGAACCAACCCCTACTG	GTGGTGGTGGTGCTCTAGGT	TGGGAACAGGTTCATTTGGT	CGGTTTCAAGTCCCGATAAA
cpar2_600640Δ	CPAR2_600640	N/A	N/A	GTGAAACACTTTTCGTAAAT		cacggcgcgcctagcagcggTTTTCTGGGAGTTGGTTGTA	gcagggatgcggccgctgacAACATCCGTCGCATTTCGATagctcggatccactagtaacg	gtcagcggccgcatccctgcGTCTTACATTCAAGTTGGCT	CCAATGCGGCGGTATATACT	CTAGAACAGGGATATGTAAC	AAACAAACAGAAAAGACCAT	TTCAAAAAGAGGTGGGTTCG	AATGAGCAGCATCAACATCG
cpar2_703890Δ	CPAR2_703890	N/A	N/A	ATTTTTGTCATTACTTATCA		cacggcgcgcctagcagcggTGTATCTTTTCTTGTACACG	gcagggatgcggccgctgacGGCTTGTTCAAATCCCTTCAagctcggatccactagtaacg	gtcagcggccgcatccctgcAAAGAGGAGATTGTGGAAAC	ACACCTATGGGTGATTAGTT	TCTAGCACGATTCTTTTGAT	AAGTAAAACACAAACACGTC	GGCAAGTGGTGGAACAAACT	CCACAACCTTTTGTTGCTGA
cpar2_401970Δ	CPAR2_401970	N/A	N/A	GGCTGCTCAATCGCCCATTC		cacggcgcgcctagcagcggACACTTGTAACTACTATCCT	gcagggatgcggccgctgacTATCCCTACGGCATTGCGTGagctcggatccactagtaacg	gtcagcggccgcatccctgcTAGTAATTACACTCATTTGT	TTGTCACTCATGCGGTGGGT	GGTTTCCGAGTTTAGAAATT	TTCTTCAGTAAATGAAGCAA	GCGATTTTGACACAGCAAGA	CAATAGCTCGGCCATACCAT
cpar2_703890Δ	CPAR2_704370	N/A	N/A	TTTTGAGGGGGTTTTTTTTA		cacggcgcgcctagcagcggTACAGTTGATGTGACTGCAT	gcagggatgcggccgctgacGGGCCTCATTTCCGTAACATagctcggatccactagtaacg	gtcagcggccgcatccctgcCGGATGTGTATATCCACATT	GCAATAGCAAACAAATGAGC	TTGAGGTTCCGCGTTAATAG	ATTGTCTAATCATACTGACT	CGCCAAGAGACCTAGCTGAC	ATTCGTATTGCCAAGCCAAC
cpar2_302900Δ	CPAR2_302900	N/A	N/A	ATTGTGAGCACCATGATGGT		cacggcgcgcctagcagcggAATGATTCAAACAATGAGAT	gcagggatgcggccgctgacATTGGACCGTCGTCAGACCTgctcggatccactagtaacg	gtcagcggccgcatccctgcCCAATGGGTTGCCGGACTGG	AAATTGTGATTGAAGCTGTT	GCTTTAGAAGCTGAAGAAGG	TGTGGGGCTAAAAAGTTTCG	CAAGCATGCCAAGTACGAAA	CAAGTGCTGGATCGAATGCT
leu3Δ	CPAR2_101730	orf19.4225	LEU3	GTCCTATGCTCTGGATGAGC		cacggcgcgcctagcagcggGTTTCGTAGTGAATGAAAGT	gcagggatgcggccgctgacACCGCTGGACGATTTGTTGTagctcggatccactagtaacg	gtcagcggccgcatccctgcTAATACCTGGCGGTGAATAT	CGGAAATGTCAGGATTGGTT	CATCTGCCAACCCACAAAGA	CCTGGTTCAGGACACTCTGG	CATATTGGCCACCAATCACA	TCTTCGGGAATTTGAACGTC
cup2Δ	CPAR2_201510	orf19.5001	CUP2	CTTAATTTTCCTGGTCAGCC		cacggcgcgcctagcagcggTTTGCTTTGTGCGGTGATAC	gcagggatgcggccgctgacCGCCCTATTATACAATCGGAagctcggatccactagtaacg	gtcagcggccgcatccctgcATCGAAGTGCAGATGATCTT	GTAAAATCACCCGACAACAA	GGATCTCAAGCAGCAGCGGC	AAATACGACTTGAAATGGGT	CCAGCAGTTTAGCATCGTCA	CTGGTATTCCCAGCAATGGT
cat8Δ	CPAR2_207400	orf19.5097	CAT8	ATTTTTGTGACGTTCGGCTC		cacggcgcgcctagcagcggTTTGTTGGCGTGGATATAGG	gcagggatgcggccgctgacGAGCAGACTACAGTTATGTCagctcggatccactagtaacg	gtcagcggccgcatccctgcCGGAGCAACCTCCATTATTT	AGAAATCGATGCTATCTTTG	GACAATCTCATTATAGATTG	GACGACATTACAACCTTTTT	GGAGACTGCATTTTGCATCA	GATGGCTGGCTTTGAATCAT
tea1Δ	CPAR2_405770	orf19.6985	TEA1	GGTAAATACAACCCGCAAGT		cacggcgcgcctagcagcggCGCTTTGGTAAGAGCTATTT	gcagggatgcggccgctgacTCTAGGGTACTACGCATCGGagctcggatccactagtaacg	gtcagcggccgcatccctgcATTCCTAGATTAGATTATTT	TCCGTTGGTGCTGCATCAGG	TGCATTCGGTGATAAGGTCA	CAAGCCACCAACCCTTGACC	AAGATGGCTGACTCGTCGAT	TCCATTGTTGGATTTGAGCA
yox1Δ	CPAR2_300250	orf19.7017	YOX1	ATACTTGTATTTCTTCTCCT		cacggcgcgcctagcagcggTGTGGAATAAAATGTGGGAC	gcagggatgcggccgctgacATCGAGGGACGAGTCTTCATagctcggatccactagtaacg	gtcagcggccgcatccctgcAAAAGAGAGAGGTATTGTAT	TTCCCTTTGTCACAATAGTG	TATATAATGATAACTTCGGC	GGGTTTTATGCATCTTTGCT	CAACAACAGCAGCAACCACT	GCGTTGGTAAGGGGGATAAT
suc1Δ	CPAR2_700130	orf19.7319	SUC1	CGCGTTTCTTTCGAGTTGGT		cacggcgcgcctagcagcggGTGGCTTGATTCCATCTCGT	gcagggatgcggccgctgacGCGGCTAACATACAATTCGAagctcggatccactagtaacg	gtcagcggccgcatccctgcTGTTTAATGGATATTTATGA	CGATATCGGTTACTAATTAT	TGATGATTCCACTTTCAGTA	GCTTTGCTTACTATTCGGTA	ATGCCTTGAGTTGTGCTGTG	CACCCTATCAAGACCGAGGA
kar4Δ	CPAR2_801280	orf19.3736	KAR4	TTTGTCTGGCACGTAACTCC		cacggcgcgcctagcagcggGGCCGTTGCTTCCCCTCCTT	gcagggatgcggccgctgacCAGCAGGTGAAACGATGCCAagctcggatccactagtaacg	gtcagcggccgcatccctgcGTTGGTTAGTATTTAATTGG	TAGTTTGGAAAAAAAGGAGA	GTAACTCTCGTAATTTCTCA	GGGAGCTGGTGGAGCTGGTG	CATGATTGGTGCTTTGGTTG	GGTGTCGATATTGCAGTGGA
hal9Δ	CPAR2_303520	orf19.3190	HAL9	CAAAATTCTGCTTGCAAACT		cacggcgcgcctagcagcggTTAAAGTTTAATATGTTGTT	gcagggatgcggccgctgacCAACTTTACCGAATAGGTGCagctcggatccactagtaacg	gtcagcggccgcatccctgcAGTACTTCGATGCACGTGTG	TTGGCTTCACATTTGGAATT	AAGTTAAATTGCCACCACTA	GCATTACAAGAGCACATGAA	GTCCAGTGAAGGGGTTGAAA	GCAAAGGTTTCCCATAACGA
tac1Δ	CPAR2_303510	orf19.3188	TAC1	GTGTCCTACGATCGTATAAT		cacggcgcgcctagcagcggGTTGCAGTAAAACCAATAGT	gcagggatgcggccgctgacCAACTTGTAGGGACGATGATagctcggatccactagtaacg	gtcagcggccgcatccctgcAAAAGGCGCCTGTGCCTGTC	GGAGTGAGCTTTGAGTAACA	TTGACTTGGATAAGTTGTTA	CGGGTGTTTCATCTCGGAGG	GGGGCTGAATGTATCACACC	ACCGACGTCATCATCAACAA
znc1Δ	CPAR2_303500	orf19.3187	ZNC1	TGTTGGCATCATCACAACAA		cacggcgcgcctagcagcggCTTACAGTAGCTTGTTCAAG	gcagggatgcggccgctgacCAACTTCCGGTAATATCCTGagctcggatccactagtaacg	gtcagcggccgcatccctgcCGGTAGCGTATTTAGTTCTA	AATTTTTGTTGTTTTTGATA	ATTCACAAATCCTTCCAGAT	GTTCCGGGGCTATGATTTTC	AAACGCAATGAGGGGTACAG	TCAAGGTGGTCACATCCTCA
opi1Δ	CPAR2_206390	orf19.1543	OPI1	GTAATACAAACGTTTTTTTT		cacggcgcgcctagcagcggGATATTATGAGATGTGCTGT	gcagggatgcggccgctgacGACGAGGCCGTACTGCTAATagctcggatccactagtaacg	gtcagcggccgcatccctgcGGTTTGATTGATTGAATTTG	GTCTGAGAGTGGTGAGTACC	TGCACTTTGTGAACTTGTTT	CCAACTTTCGCTCTTCATTA	GACTCGAAGTGCCACTCCTC	GTCGCTTGGTTTGGTGTCTT
gat1Δ	CPAR2_500590	orf19.1275	GAT1	CACTTTGTGTTTGACTTGAC		cacggcgcgcctagcagcggTGACATGTTCGATAATTGTT	gcagggatgcggccgctgacGGTCCAGACATACCAACGGAagctcggatccactagtaacg	gtcagcggccgcatccctgcAGGTATTGAAAGAAAGAAAA	ATCCAAATCGGCGCCATCCT	AGTGTGATAATTCTCTAGTG	ACTTTTCGTGTGGTTCGCAC	GATCCATTGGCATTTGAAGG	AATGTGAACGGTTGGGGTAA
rpn4Δ	CPAR2_106900	orf19.1069	RPN4	CCACCTACTACTAGTCATCT		cacggcgcgcctagcagcggGCTGTTGTGGTTGCTATTGA	gcagggatgcggccgctgacAGGCATCTCACATACTGTTCagctcggatccactagtaacg	gtcagcggccgcatccctgcGGAGGGCAATGGGAGAGAGA	CCGGGTTATTTCAAATGAGC	CCTAAAATGGAAGATGGTGG	CTAATGTTCCATAATAATGT	CATCGCAAGCATTTTCTCAA	ACCCGGTGGAACATAAAATG
war1Δ	CPAR2_110360	orf19.1035	WAR1	GAAAGGGGTAGTAAACAGTA		cacggcgcgcctagcagcggTGTGTGTGCAATAAGGCTTT	gcagggatgcggccgctgacATCATGTCTCAAGGTCGGCCagctcggatccactagtaacg	gtcagcggccgcatccctgcTAGAGTTTATACATTTTTGT	TCACATTCTTTTTCATCCAA	GTTGATCTAGCTTCTACGCA	TGAGTTGTTGGAAGTGTTTA	TTTCCAAATCGGACCTTGAG	TCGTGCAAAAGTGACACACA
rgt1Δ	CPAR2_400190	orf19.2747	RGT1	GAAAAATCGGATTGAACTGC		cacggcgcgcctagcagcggGATCATCCTGTCATAAGCAA	gcagggatgcggccgctgacTAGAGCCTCAGCATTCATCGagctcggatccactagtaacg	gtcagcggccgcatccctgcGAAAAAGAAAATGAAAATAT	AGCGGTATCTTTCCCTTTGG	GGTTTATGAATTTGATTCGA	TTTCTTTTTGATCTCAGTTG	CCATTTTGGAAAGTGCCCTA	CCATGGGAGAAGTTTGCATT
sfl1Δ	CPAR2_101060	orf19.3969	SFL2	AGCAGAAACCACAGCGTATT		cacggcgcgcctagcagcggGCTGGAGAACGTTCTTTGGT	gcagggatgcggccgctgacACATCTGCGAAATGCGGCCAagctcggatccactagtaacg	gtcagcggccgcatccctgcGCTCACTTTCCAACTTTGGA	AAACACAAAGTAACAACAAT	AGCAGAAACCACAGCGTATT	TATATACAAATCACTACACA	AGAACACCACCTCCATCGTC	GCACTTGCTAACCCACCAAT
CPRI				CpHIS1KO1		cacggcgcgcctagcagcggTGATTGACTAAATCCATGTTAAGG	gcagggatgcggccgctgacACGGCAGTCACCTACTATTGagctcggatccactagtaacg	gtcagcggccgcatccctgcCTCAAACTGTAGAGTATAAAATA	CpHIS1KO7	CpHIS1KO5
Barcodes are highted in red and bold.

## Sheet: Other primers
Primer Name	Sequence
LEUcheck 1	GAAGTTGGTGACGCGATTGT	check primers for fusion deletion strains
LEUcheck 2	TTCCCCTTCAATGTATGCAA
HIScheck 1	AAAATCAATGGGCATTCTCG
HIScheck 2	TGGGAAGCAGACATTCAACA
CpHIS1KO1	GGGGGGTACCCGAGTTCAAACCATGGGATA (KpnI)	C. parapsilosis HIS1 deletion
CpHIS1KO2	GGGGGGGCCCTTTGGGACTGCAAACAACAA (ApaI)
CpHIS1KO3	GGGGCCGCGGTGAGGAAGACTGGGTGGCTA (SacII)
CpHIS1KO4	GGGGGAGCTCTGCTGCTTTTTACACAATGTCA (SacI)
CpHIS1KO5	ACGAAATGACACATGCCGTA
CpHIS1KO6	TTTCAAATTGGTCCGACTCC
CpHIS1KO7	GAGAGGCGGGTGATACCATA	re-integration of CdHIS1
CpLEU2-KO1	GGGGGGTACCGGTCATTAAGGGGGTGGAAG (KpnI)	C. parapsilosis LEU2 deletion
CpLEU2-KO2	GGGGGGGCCCACCAACGTGATCACCAGGTA (ApaI)
CpLEU2-KO3	GGGGCCGCGGGGCGATTTGAAGGGAAGTAA (SacII)
CpLEU2-KO4	GGGGGAGCTCTTTGGGGAGGAGTCACATTT (SacI)
CpLEU2-KO5	GATGACGCTTTGGCTCATTC
CpLEU2-KO6	AGTACCCCATTTGGGTCCAC
BUT237	GCTGTTCCGTTATGTGTAATCATCC
Ace2-pSFS2(KpnI)-F	ggagGGTACCTTCATTTAAAACAGCCGTTGG	Complementation of ace2
Ace2-pSFS2(ApaI)-R	ggagGGGCCCCGGAATACACACAAAGGAACC
Ace2-Chk-F	TGAGAGATTGAGTAATGTAGT	upstream check primer
Ace2-check-R	TGGCAAATCCACTAGGAACA	internal check primer
Czf1-pSFS2(ApaI)-F2	ggagGGGCCCTCTAGAATATGGGACGCATAGG	Complementation of czf1
CZF1-pSFS2(Xho1)	ggggCTCGAGTTGTTGGTTGTCAAAAGAGCA
Czf1-Chk-F(2)	TTCACACCTGTGCCCAATAA	upstream check primer
CpCZF1-COMPcheck	GCTGGTTGTGGAGGGTACTG	internal check primer
UME6-pSFS2(ApaI)_2	ggcgGGGCCCAAAAGCGCTCACTTTTCAGG	Complementation of ume6
UME6-pSFS2(XhoI)	ggggCTCGAGCATTTACGCAAAACCGACAA
UME6-Fcheck_2	CAATGGCTCTAAGGGCTCAA	upstream check primer
CpUME6-COMPcheck	TGCAAGCCTGTTGAGCATAC	internal check primer
Cph2-pSFS2(KpnI)-F	ggagGGTACCGTCCCGAAACGTACACCAGT	Complementation of cph2
Cph2-pSFS2(XhoI)-R	ggggCTCGAGCCCAAAGGTATACTGCATGG
Cph2-check-F	AAGCTGTTGTTGATGGTTTCG	upstream check primer
Cph2-check-R	TTCGCCAAGTCAGGCTTATT	internal check primer
Gzf3-pSFS2(ApaI)-F	ggagGGGCCCCGACTAAACTTTTTGCCTAACTCC	Complementation of gzf3
Gzf3-pSFS2(XhoI)-R	ggggCTCGAGCAGATTTATGACGTGGGTGCT
Gzf3-Chk-F	GCAGCAATCACTCTCCACCT	upstream check primer
CpGZF3-COMPcheck	GTTGGCAAAGGGTGAGAAAT	internal check primer
Mkc1-pSFS2(ApaI)-F	ggagGGGCCCACCGTAACATGCGACGAAA	Complementation of mkc1
Mkc1-pSFS2(XhoI)-R	ggggCTCGAGGTAAGAATGGCGATCTATTCAAA
Mkc1-Chk-F	GAGACTTTCATGCGCAGTTG	upstream check primer
CpMKC1-COMPcheck	AATCTCCCTCAAAGCTCGTTT	internal check primer
